# Supplementary material for: Proteomic Changes in Rat Spermatogenesis in Response to In Vivo Androgen Manipulation; Impact on Meiotic Cells
Source: PubMed Central journal article supplement (PMC3408499; doi:10.1371/journal.pone.0041718), 2012-07-30
Supplement: pone.0041718.s003.pdf [file pone.0041718.s003.pdf]

Stanton, Sluka et al: Proteomic changes in rat spermatogenesis in response to in vivo androgen manipulation; impact on meiotic cells.

## Table S3 Mass Spectra for Identified Proteins

### Spot 1 (A3 20080606) – Phosphatidylethanolamine-binding protein 1 (Pebp1)

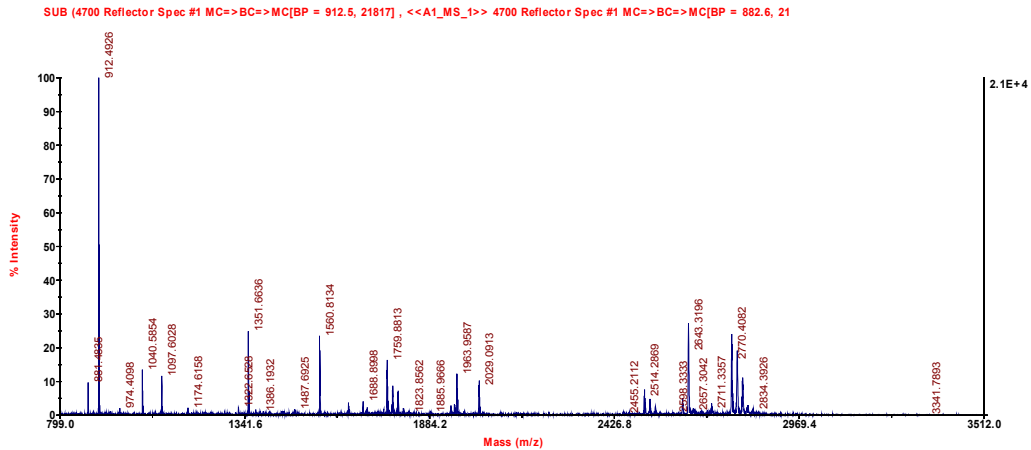

| Spot 1 (20080606-A3) Pebp1 |           |        |       |     |                           |           |                    |
|----------------------------|-----------|--------|-------|-----|---------------------------|-----------|--------------------|
| MS•MS/MS                   |           |        |       |     |                           |           |                    |
| Calculated                 | Observed  | +/-ppm | start | end | Sequence                  | Ion Score | C.I.% Modification |
| 881.4839                   | 881.4835  | 0      | 180   | 187 | LHDGLAGK                  |           |                    |
| 912.4937                   | 912.4913  | -3     | 149   | 155 | FKVESFR                   |           |                    |
| 912.4937                   | 912.4913  | -3     | 149   | 155 | FKVESFR                   | 55        | 100                |
| 1351.674                   | 1351.6621 | -9     | 27    | 39  | VDYGGVTVDLGGK             |           |                    |
| 1351.674                   | 1351.6621 | -9     | 27    | 39  | VDYGGVTVDLGGK             | 50        | 99.999             |
| 1560.8268                  | 1560.8151 | -7     | 63    | 76  | LYTLVLTDPDAPSR            | 33        | 99.949             |
| 1560.8268                  | 1560.8151 | -7     | 63    | 76  | LYTLVLTDPDAPSR            |           |                    |
| 1688.9218                  | 1688.9044 | -10    | 63    | 77  | LYTLVLTDPDAPSRK           |           |                    |
| 1758.8896                  | 1758.8826 | -4     | 81    | 93  | FREWHHFLVNMK              |           | Oxidation (M)      |
| 1758.8896                  | 1758.8826 | -4     | 81    | 93  | FREWHHFLVNMK              |           | Oxidation (M)      |
| 1963.9607                  | 1963.9598 | 0      | 94    | 113 | GNDISSGTVLSEYVGSPPK       | 91        | 100                |
| 1963.9607                  | 1963.9598 | 0      | 94    | 113 | GNDISSGTVLSEYVGSPPK       |           |                    |
| 2514.2656                  | 2514.29   | 10     | 40    | 62  | VLPTQVMNRPSSISWDGLDPGK    |           | Oxidation (M)      |
| 2643.3008                  | 2643.3284 | 10     | 94    | 119 | GNDISSGTVLSEYVGSPPKDTGLHR |           |                    |
| 2643.3008                  | 2643.3284 | 10     | 94    | 119 | GNDISSGTVLSEYVGSPPKDTGLHR | 55        | 100                |

| Spot 1 (20080606-A3) Pebp1 |           |        |       |     |                               |           |                    |
|----------------------------|-----------|--------|-------|-----|-------------------------------|-----------|--------------------|
| PMF/MALDI                  |           |        |       |     |                               |           |                    |
| Calculated                 | Observed  | +/-ppm | start | end | Sequence                      | Ion Score | C.I.% Modification |
| 1350.6667                  | 1351.6636 | -8     | 27    | 39  | R.VDYGGVTVDLGGK.V             |           |                    |
| 2513.2584                  | 2514.2871 | 9      | 40    | 62  | K.VLPTQVMNRPSSISWDGLDPGK.L    |           | Oxidation (M)      |
| 1559.8195                  | 1560.8134 | -9     | 63    | 76  | K.LYTLVLTDPDAPSR.K            |           |                    |
| 1687.9145                  | 1688.8999 | -13    | 63    | 77  | K.LYTLVLTDPDAPSRK.D           |           |                    |
| 2028.0891                  | 2029.0914 | -2     | 63    | 80  | K.LYTLVLTDPDAPSRKDPK.F        |           |                    |
| 1757.8824                  | 1758.8802 | -5     | 81    | 93  | K.FREWHHFLVNMK.G              |           | Oxidation (M)      |
| 1454.7129                  | 1455.6968 | -16    | 83    | 93  | R.EWHHFLVNMK.G                |           | Oxidation (M)      |
| 1962.9635                  | 1963.9589 | -1     | 94    | 113 | K.GNDISSGTVLSEYVGSPPK.D       |           |                    |
| 2642.2936                  | 2643.3196 | 7      | 94    | 119 | K.GNDISSGTVLSEYVGSPPKDTGLHR.Y |           |                    |
| 1096.6029                  | 1097.6028 | -7     | 147   | 155 | R.GKFVESFR.K                  |           |                    |
| 911.4865                   | 912.4926  | -1     | 149   | 155 | K.FKVESFR.K                   |           |                    |
| 1039.5815                  | 1040.6954 | -3     | 149   | 156 | K.FKVESFRK.K                  |           |                    |
| 2704.2955                  | 2705.303  | 0      | 156   | 179 | R.KKYHLGAPYAGTCFQAEWDDSVPK.L  |           |                    |
| 880.4767                   | 881.4835  | 0      | 180   | 187 | K.LHDGLAGK.                   |           |                    |

## Spot 1 (D4 20080815) - Phosphatidylethanolamine-binding protein 1 (Pebp1)

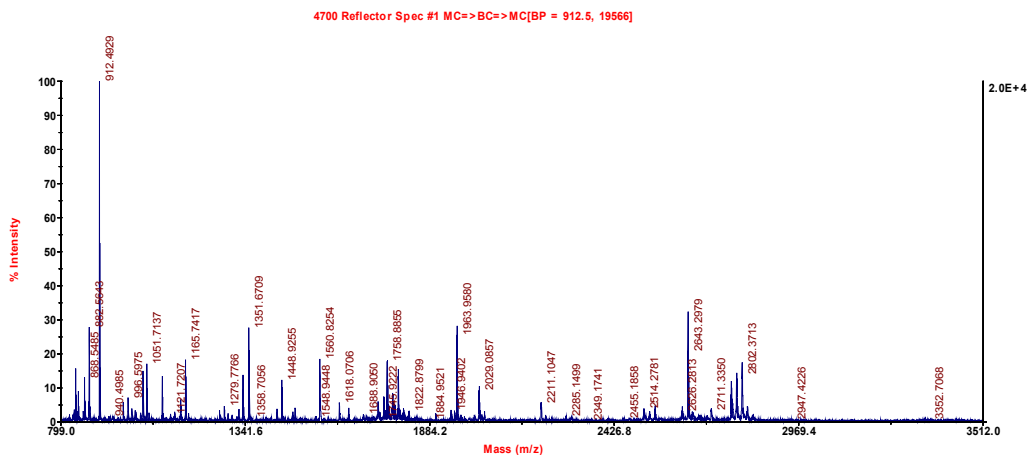

| Spot 1 (20080815-D4) Pebp1 |           |        |       |     |                           |               |
|----------------------------|-----------|--------|-------|-----|---------------------------|---------------|
| MS•MS/MS                   |           |        |       |     |                           |               |
| Calculated                 | Observed  | +/-ppm | start | end | Sequence                  |               |
| 881.4839                   | 881.4843  | 0      | 180   | 187 | LHDQLAGK                  |               |
| 912.4937                   | 912.4923  | -2     | 149   | 155 | FKVESFR                   |               |
| 912.4937                   | 912.4923  | -2     | 149   | 155 | FKVESFR                   | 34            |
| 1351.674                   | 1351.6698 | -3     | 27    | 39  | VYGGVTVDELGK              | 99.957        |
| 1351.674                   | 1351.6698 | -3     | 27    | 39  | VYGGVTVDELGK              | 54            |
| 1560.8268                  | 1560.8223 | -3     | 63    | 76  | LYTLVLTDPDAPSR            | 100           |
| 1560.8268                  | 1560.8223 | -3     | 63    | 76  | LYTLVLTDPDAPSR            | 26            |
| 1758.8896                  | 1758.8821 | -4     | 81    | 93  | FREWHFLVNMK               | 99.727        |
| 1758.8896                  | 1758.8821 | -4     | 81    | 93  | FREWHFLVNMK               |               |
| 1963.9607                  | 1963.9541 | -3     | 94    | 113 | GNDISSGTVLSEYVGSPPK       | Oxidation (M) |
| 1963.9607                  | 1963.9541 | -3     | 94    | 113 | GNDISSGTVLSEYVGSPPK       | 66            |
| 1963.9607                  | 1963.9541 | -3     | 94    | 113 | GNDISSGTVLSEYVGSPPK       | 100           |
| 2514.2656                  | 2514.2722 | 3      | 40    | 62  | VLTPQVMNRPSSISWDGLDPGK    | Oxidation (M) |
| 2643.3008                  | 2643.2937 | -3     | 94    | 119 | GNDISSGTVLSEYVGSPPKDTGLHR |               |
| 2643.3008                  | 2643.2937 | -3     | 94    | 119 | GNDISSGTVLSEYVGSPPKDTGLHR | 57            |

## Spot 1 (D18 20080815) - Phosphatidylethanolamine-binding protein 1 (Pebp1)

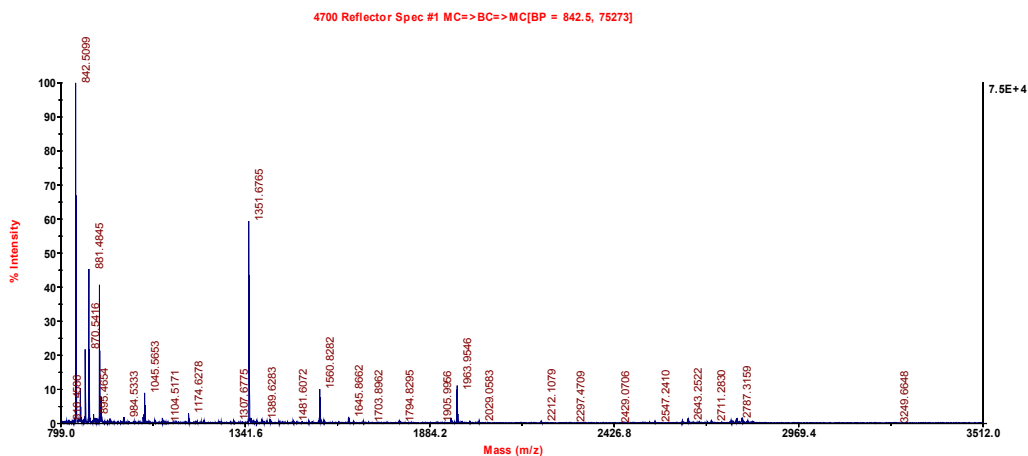

| Spot 1 (20080815-D18) Pebp1 |           |        |       |     |                               |               |
|-----------------------------|-----------|--------|-------|-----|-------------------------------|---------------|
| PMF/MALDI                   |           |        |       |     |                               |               |
| Calculated                  | Observed  | +/-ppm | start | end | Sequence                      |               |
| 1350.6667                   | 1351.6765 | 2      | 27    | 39  | R.VYGGVTVDELGK.V              |               |
| 2513.2584                   | 2514.2517 | -6     | 40    | 62  | K.VLTPQVMNRPSSISWDGLDPGK.L    | Oxidation (M) |
| 1559.8195                   | 1560.8282 | 1      | 63    | 76  | K.LYTLVLTDPDAPSR.K            |               |
| 1687.9145                   | 1688.9125 | -5     | 63    | 77  | K.LYTLVLTDPDAPSRK.D           |               |
| 2028.0891                   | 2029.0584 | -19    | 63    | 80  | K.LYTLVLTDPDAPSRKDPK.F        |               |
| 1757.8824                   | 1758.83   | -34    | 81    | 93  | K.FREWHFLVNMK.G               | Oxidation (M) |
| 1438.718                    | 1439.754  | 20     | 83    | 93  | R.EWHFLVNMK.G                 |               |
| 1962.9535                   | 1963.9546 | -3     | 94    | 113 | K.GNDISSGTVLSEYVGSPPK.D       |               |
| 2642.2936                   | 2643.2522 | -18    | 94    | 119 | K.GNDISSGTVLSEYVGSPPKDTGLHR.Y |               |
| 1096.6029                   | 1097.6086 | -1     | 147   | 155 | R.GKFVESFR.K                  |               |
| 911.4865                    | 912.495   | 1      | 149   | 155 | K.FKVESFR.K                   |               |
| 1039.5815                   | 1040.5895 | 1      | 149   | 156 | K.FKVESFRK.K                  |               |
| 892.513                     | 893.4838  | -41    | 151   | 157 | K.VESFRKK.Y                   |               |
| 880.4767                    | 881.4845  | 1      | 180   | 187 | K.LHDQLAGK.-                  |               |

## Spot 4 (C20 20080606) - Alpha-enolase (Eno1)

SUB (4700 Reflector Spec #1 MC=>BC=>MC[BP = 1929.3, 9947] , <<C1\_MS\_1>> 4700 Reflector Spec #1 MC=>BC=>MC[BP = 882.6, 67

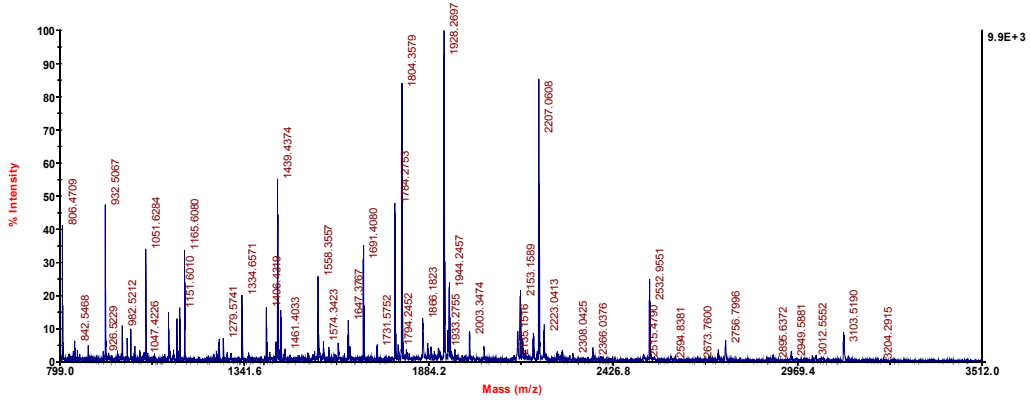

| Spot 4 (20080606.C20) Eno1 |           |        |       |     |                |               |
|----------------------------|-----------|--------|-------|-----|----------------|---------------|
| MS•MS/MS                   |           |        |       |     |                |               |
| Calculated                 | Observed  | +/-ppm | start | end | Sequence       |               |
| 806.4518                   | 806.4478  | -5     | 407   | 412 | YNGILR         |               |
| 806.4518                   | 806.4478  | -5     | 407   | 412 | YNGILR         | 22            |
| 932.5311                   | 932.5351  | 4      | 427   | 434 | SFRNPLAK       |               |
| 932.5311                   | 932.5351  | 4      | 427   | 434 | SFRNPLAK       | 3             |
| 1118.6681                  | 1118.6691 | 1      | 404   | 412 | LAKYNQILR      |               |
| 1143.6156                  | 1143.6167 | 1      | 184   | 193 | IGAEVYHNLK     |               |
| 1259.7106                  | 1259.7148 | 3      | 121   | 132 | AGAVEKGVPLRY   |               |
| 1406.7162                  | 1406.6876 | -20    | 16    | 26  | GNPTVEVDLYTAK  |               |
| 1439.7417                  | 1439.7106 | -22    | 270   | 281 | YITPDQLADLYK   | 47            |
| 1439.7417                  | 1439.7106 | -22    | 270   | 281 | YITPDQLADLYK   | 99.999        |
| 1646.8319                  | 1646.7548 | -47    | 180   | 193 | EAMRIGAEVYHNLK |               |
| 1691.8962                  | 1691.8134 | -49    | 407   | 420 | YNGILRIEELGSK  | Oxidation (M) |
| 1691.8962                  | 1691.8134 | -49    | 407   | 420 | YNGILRIEELGSK  |               |

## Spot 4 (D15 20070719) – Alpha-enolase (Eno1)

4700 Reflector Spec #1 MC=>BC=>MC[BP = 1786.6, 4233]

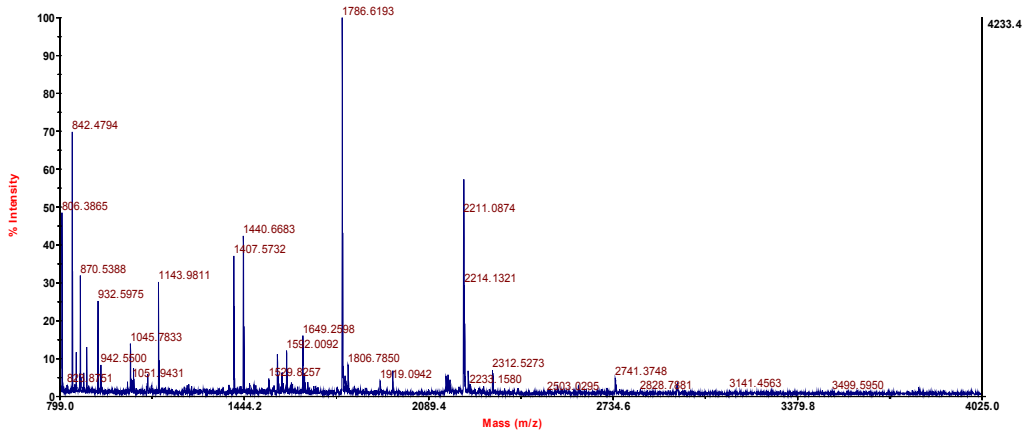

| Spot 4 (20070719.D15) Eno1 |           |        |       |     |                     |               |
|----------------------------|-----------|--------|-------|-----|---------------------|---------------|
| MS•MS/MS                   |           |        |       |     |                     |               |
| Calculated                 | Observed  | +/-ppm | start | end | Sequence            |               |
| 806.4518                   | 806.4626  | 13     | 406   | 411 | YNGILR              |               |
| 806.4518                   | 806.4626  | 13     | 406   | 411 | YNGILR              | 3             |
| 932.5311                   | 932.5218  | -10    | 426   | 433 | SFRNPLAK            | 12            |
| 932.5311                   | 932.5218  | -10    | 426   | 433 | SFRNPLAK            | 95.732        |
| 1056.536                   | 1056.531  | -5     | 253   | 261 | AGKYDLDFK           |               |
| 1143.6156                  | 1143.6307 | 13     | 183   | 192 | IGAEVYHNLK          | 27            |
| 1143.6156                  | 1143.6307 | 13     | 183   | 192 | IGAEVYHNLK          | 99.88         |
| 2192.0327                  | 2192.1135 | 37     | 233   | 252 | AGYTDQVIGMDVAASEFYR |               |
| 2208.0278                  | 2208.1079 | 36     | 233   | 252 | AGYTDQVIGMDVAASEFYR | Oxidation (M) |

## Spot 9 (P1014-16) – mixture of: Aldose reductase (Akr1b1), Palmitoyl-protein thioesterase 1 (Ppt-1) and L-lactate dehydrogenase C chain (Ldhc)

| Spot 9 (P1014-16) Akr1b1, Ppt-1 & Ldhc<br>LCMS/MS (Scaffold) |         |                                                                              |                         |                   |                      |                           |               |                 |                           |              |                     |
|--------------------------------------------------------------|---------|------------------------------------------------------------------------------|-------------------------|-------------------|----------------------|---------------------------|---------------|-----------------|---------------------------|--------------|---------------------|
| Sample Name                                                  | Acc No. | Proteins(s) inferred                                                         | No. Peptides identified | Sequence Coverage | Position in sequence | Peptide Sequence          | Precursor m/z | Charge observed | Calculated mass (neutral) | Mascot score | Mascot Expect value |
| P1014-16                                                     | P07943  | sp P07943 Aldose reductase Tax_id=101116 [Rattus norvegicus]                 | 1                       | 4.43%             | 156 - 169            | (K)AIGVSNFNPLQIER(I)      | 779.22        | 2               | 1556.42                   | 78.3         | 5.48E-005           |
|                                                              | P45479  | sp P45479 Palmitoyl-protein thioesterase 1 Tax_id=101116 [Rattus norvegicus] | 1                       | 4.90%             | 254 - 268            | (K)ETIPLQETTLYTEDR(L)     | 905.22        | 2               | 1808.43                   | 91.4         | 2.39E-006           |
|                                                              | P19629  | sp P19629 L-lactate dehydrogenase C chain Tax_id=101116 [Rattus norvegicus]  | 1                       | 5.72%             | 2 - 20               | (M)STVKEQLIQNLAPDEKQSR(C) | 742.56        | 3               | 2224.66                   | 58.0         | 5.87E-003           |

| Spot 9 [P1014-16 (75965 Rattus)] Akr1b1<br>LCMS/MS |          |        |       |     |                    |           |                    |
|----------------------------------------------------|----------|--------|-------|-----|--------------------|-----------|--------------------|
| Calculated                                         | Observed | +/-ppm | start | end | Sequence           | Ion Score | C.I.% Modification |
| 1212.7078                                          | 606.9384 | 1      | 54    | 64  | K.EVGVALGEK(L)K.E  | 9         |                    |
| 1567.6799                                          | 523.7704 | 0      | 79    | 90  | K.LWCTFHDGSMVK.G   | 7         | Oxidation (M)      |
| 1556.8311                                          | 779.2179 | 0      | 156   | 169 | K.AIGVSNFNPLQIER.I | 78        |                    |
| 1556.8311                                          | 779.2619 | 0      | 156   | 169 | K.AIGVSNFNPLQIER.I | 50        |                    |

| Spot 9 [P1014-16 (75965 Rattus)] Ppt-1<br>LCMS/MS |           |        |       |     |                                    |           |                    |
|---------------------------------------------------|-----------|--------|-------|-----|------------------------------------|-----------|--------------------|
| Calculated                                        | Observed  | +/-ppm | start | end | Sequence                           | Ion Score | C.I.% Modification |
| 952.4549                                          | 476.9599  |        | 1     | 8   | - .MASPGYRR.L                      | 11        | Oxidation (M)      |
| 3121.5624                                         | 1041.2379 |        | 123   | 151 | R.AVAGRCPTPPMMLTISVGGQHGQVGFGLPR.C | 10        | Oxidation (M)      |
| 1037.5505                                         | 519.8224  |        | 165   | 174 | R.KSLNAGAYSK.V                     | 33        |                    |
| 2279.1281                                         | 760.6489  |        | 249   | 268 | R.SGQAKETIPLQETTLYTEDR.L           | 22        |                    |
| 1807.884                                          | 905.2199  |        | 254   | 268 | K.ETIPLQETTLYTEDR.L                | 91        |                    |
| 1335.7584                                         | 446.9589  |        | 274   | 285 | K.MDKAGKLVFLAK.E                   | 15        | Oxidation (M)      |

| Spot 9 [P1014-16 (75075 Rodent)] Ldhc<br>LCMS/MS |          |        |       |     |                         |           |                         |
|--------------------------------------------------|----------|--------|-------|-----|-------------------------|-----------|-------------------------|
| Calculated                                       | Observed | +/-ppm | start | end | Sequence                | Ion Score | C.I.% Modification      |
| 2225.1651                                        | 742.5602 |        | 2     | 20  | M.STVKEQLIQNLAPDEKQSR.C | 58        | Acetyl (Protein N-term) |

**Spot 16 (D14 20080815) - mCG11326, isoform CRA\_b [Mus musculus] (Hnrnp3)  
and or Heterogeneous nuclear ribonucleoprotein H3 [Mus musculus]  
(MCG11326, isoform CRA\_a) (Hnrnp3)**

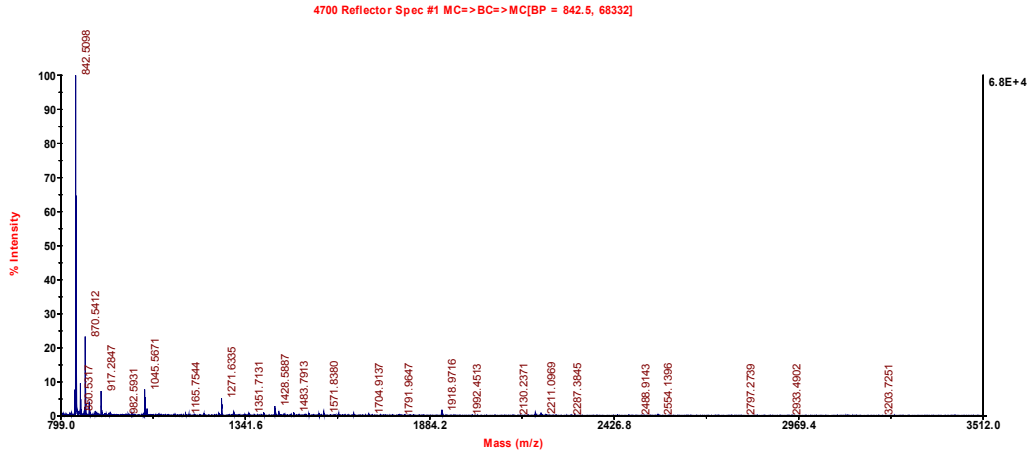

**Spot 16 (20080815-D14) Hnrnp3 (mCG11326, isoform CRA\_b)**

| PMF/MALDI  |           |        |       |     |                               |           |                    |
|------------|-----------|--------|-------|-----|-------------------------------|-----------|--------------------|
| Calculated | Observed  | +/-ppm | start | end | Sequence                      | Ion Score | C.I.% Modification |
| 1338.5913  | 1339.6135 | 11     | 7     | 19  | K.HNGPNDASDGTVR.L             |           |                    |
| 1270.6194  | 1271.6335 | 5      | 56    | 67  | R.STGEAFVGFASK.E              |           |                    |
| 2196.1062  | 2197.0503 | -29    | 56    | 76  | R.STGEAFVGFASKEIAENALGK.H     |           |                    |
| 943.4974   | 944.5088  | 4      | 68    | 76  | K.EIAENALGK.H                 |           |                    |
| 839.4541   | 840.4645  | 4      | 85    | 90  | R.YIEIFR.S                    |           |                    |
| 805.4294   | 806.4384  | 2      | 91    | 97  | R.SSRSEIK.G                   |           |                    |
| 1307.651   | 1308.6807 | 17     | 94    | 104 | R.SEIKGFYDPPR.R               |           |                    |
| 850.3974   | 851.4062  | 4      | 98    | 104 | K.GFYDPPR.R                   |           |                    |
| 1006.4985  | 1007.5095 | 4      | 98    | 105 | K.GFYDPPR.L                   |           |                    |
| 1917.9585  | 1918.9716 | 3      | 191   | 207 | R.ATENDIANFFSPLNPIR.V         |           |                    |
| 1051.5411  | 1052.5562 | 7      | 208   | 217 | R.VHDIGADGR.A                 |           |                    |
| 2192.9896  | 2194.0154 | 8      | 218   | 238 | R.ATGEADVEFVTHEDAVAAMSK.D     |           | Oxidation (M)      |
| 2553.1265  | 2554.1396 | 2      | 247   | 272 | R.YIEFLNSTPGGGSGMGGSGMGGYGR.D |           | 2 Oxidation (M)    |
| 1427.5736  | 1428.5887 | 6      | 273   | 286 | R.DGMNDQGGYGSVGR.M            |           | Oxidation (M)      |

**Spot 16 (20080815-D14) Hnrnp3 (mCG11326, isoform CRA\_a)**

| PMF/MALDI  |           |        |       |     |                               |           |                    |
|------------|-----------|--------|-------|-----|-------------------------------|-----------|--------------------|
| Calculated | Observed  | +/-ppm | start | end | Sequence                      | Ion Score | C.I.% Modification |
| 1338.5913  | 1339.6135 | 11     | 7     | 19  | K.HNGPNDASDGTVR.L             |           |                    |
| 1270.6194  | 1271.6335 | 5      | 56    | 67  | R.STGEAFVGFASK.E              |           |                    |
| 2196.1062  | 2197.0503 | -29    | 56    | 76  | R.STGEAFVGFASKEIAENALGK.H     |           |                    |
| 943.4974   | 944.5088  | 4      | 68    | 76  | K.EIAENALGK.H                 |           |                    |
| 839.4541   | 840.4645  | 4      | 85    | 90  | R.YIEIFR.S                    |           |                    |
| 805.4294   | 806.4384  | 2      | 91    | 97  | R.SSRSEIK.G                   |           |                    |
| 1307.651   | 1308.6807 | 17     | 94    | 104 | R.SEIKGFYDPPR.R               |           |                    |
| 850.3974   | 851.4062  | 4      | 98    | 104 | K.GFYDPPR.R                   |           |                    |
| 1006.4985  | 1007.5095 | 4      | 98    | 105 | K.GFYDPPR.L                   |           |                    |
| 1917.9585  | 1918.9716 | 3      | 206   | 222 | R.ATENDIANFFSPLNPIR.V         |           |                    |
| 1051.5411  | 1052.5562 | 7      | 223   | 232 | R.VHDIGADGR.A                 |           |                    |
| 2192.9896  | 2194.0154 | 8      | 233   | 253 | R.ATGEADVEFVTHEDAVAAMSK.D     |           | Oxidation (M)      |
| 2553.1265  | 2554.1396 | 2      | 262   | 287 | R.YIEFLNSTPGGGSGMGGSGMGGYGR.D |           | 2 Oxidation (M)    |
| 1427.5736  | 1428.5887 | 6      | 288   | 301 | R.DGMNDQGGYGSVGR.M            |           | Oxidation (M)      |

# Spot 23 (D16 20070719) – Alpha-enolase (Eno1)

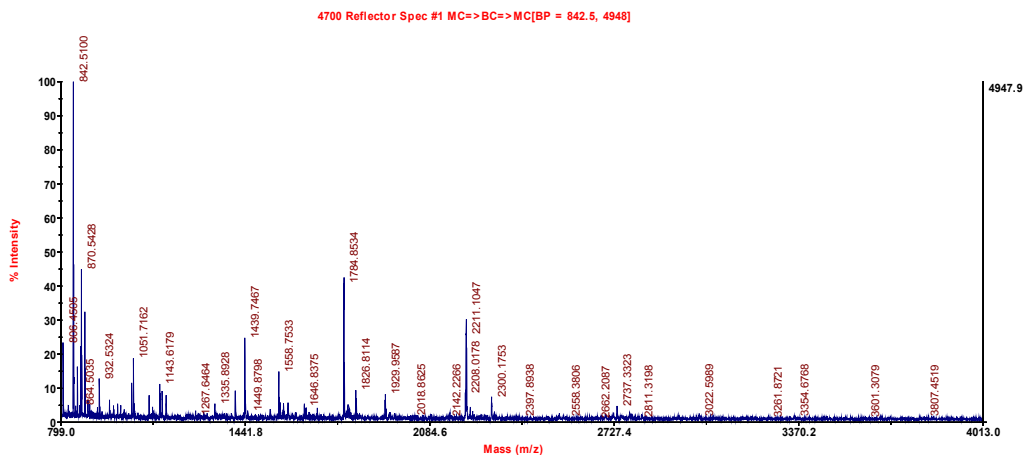

| Spot 23 (20070719-D16) Eno1 |           |        |       |     |                          |           |                    |
|-----------------------------|-----------|--------|-------|-----|--------------------------|-----------|--------------------|
| MS•MS/MS                    |           |        |       |     |                          |           |                    |
| Calculated                  | Observed  | +/-ppm | start | end | Sequence                 | Ion Score | C.I.% Modification |
| 806.4518                    | 806.4495  | -3     | 406   | 411 | YNOILR                   |           |                    |
| 806.4518                    | 806.4495  | -3     | 406   | 411 | YNOILR                   |           |                    |
| 899.5556                    | 899.5547  | -1     | 71    | 79  | TIAPALVSK                |           |                    |
| 932.5311                    | 932.5314  | 0      | 426   | 433 | SFRNPLAK                 |           |                    |
| 932.5311                    | 932.5314  | 0      | 426   | 433 | SFRNPLAK                 |           |                    |
| 1118.6681                   | 1118.678  | 9      | 403   | 411 | LAKYNOILR                |           |                    |
| 1143.6156                   | 1143.6194 | 3      | 183   | 192 | IGAEVYHNLK               |           |                    |
| 1406.7162                   | 1406.7246 | 6      | 15    | 27  | GNPTVEVDLYTAK            |           |                    |
| 1439.7417                   | 1439.75   | 6      | 269   | 280 | YITPDQLADLYK             |           |                    |
| 1439.7417                   | 1439.75   | 6      | 269   | 280 | YITPDQLADLYK             |           |                    |
| 1528.6914                   | 1528.6998 | 5      | 256   | 268 | YDLDFKSPDDASR            |           |                    |
| 1557.759                    | 1557.7505 | -5     | 358   | 371 | LAQSNQWGVVMVSHR          |           | Oxidation (M)      |
| 1646.8319                   | 1646.8419 | 6      | 179   | 192 | EAMRIGAEVYHNLK           |           | Oxidation (M)      |
| 1652.7506                   | 1652.8015 | 31     | 89    | 102 | IDQLMIEMDGTENK           |           | Oxidation (M) [5]  |
| 1784.845                    | 1784.8573 | 7      | 253   | 268 | AGKYDLDFKSPDDASR         |           |                    |
| 1784.845                    | 1784.8573 | 7      | 253   | 268 | AGKYDLDFKSPDDASR         | 13        | 95.649             |
| 1804.9438                   | 1804.9683 | 14     | 32    | 49  | AAVPSGASTGIYEALRLR       |           |                    |
| 1928.9608                   | 1928.9613 | 0      | 162   | 178 | LAMGEFMILPVGASSFR        |           | 2 Oxidation (M)    |
| 1960.9246                   | 1960.9446 | 10     | 202   | 220 | DATNVGDEGGFAPNILENK      |           |                    |
| 2208.0278                   | 2208.0281 | 0      | 233   | 252 | AGYTDQVVIQMDVAASEFYR     |           | Oxidation (M)      |
| 2208.0278                   | 2208.0281 | 0      | 233   | 252 | AGYTDQVVIQMDVAASEFYR     |           | Oxidation (M)      |
| 2309.1042                   | 2309.1313 | 12     | 199   | 220 | YGKDATNVGDEGGFAPNILENK   |           |                    |
| 2534.2844                   | 2534.3169 | 13     | 32    | 55  | AAVPSGASTGIYEALRLRDNDKTR |           |                    |

| Spot 23 (20070719-D16) Eno1 |           |        |       |     |                              |           |                    |
|-----------------------------|-----------|--------|-------|-----|------------------------------|-----------|--------------------|
| PMF/MALDI                   |           |        |       |     |                              |           |                    |
| Calculated                  | Observed  | +/-ppm | start | end | Sequence                     | Ion Score | C.I.% Modification |
| 1405.7089                   | 1406.7225 | 5      | 16    | 26  | R.GNPTVEVDLYTAK.G            |           |                    |
| 1803.9366                   | 1804.9624 | 10     | 33    | 50  | R.AAVPSGASTGIYEALRLR.D       |           |                    |
| 898.5488                    | 899.5552  | -1     | 72    | 80  | K.TIAPALVSK.K                |           |                    |
| 1651.7433                   | 1652.7972 | 26     | 90    | 103 | K.IDQLMIEMDGTENK.S           |           | Oxidation (M)      |
| 1667.7382                   | 1668.8114 | 40     | 90    | 103 | K.IDQLMIEMDGTENK.S           |           | 2 Oxidation (M)    |
| 1927.9536                   | 1928.9573 | -2     | 163   | 179 | K.LAMGEFMILPVGASSFR.E        |           | 2 Oxidation (M)    |
| 1645.8246                   | 1646.8374 | 3      | 180   | 193 | R.EAMRIGAEVYHNLK.N           |           | Oxidation (M)      |
| 1142.8084                   | 1143.6179 | 2      | 184   | 193 | R.IGAEVYHNLK.N               |           |                    |
| 2308.0971                   | 2309.113  | 4      | 200   | 221 | K.YGKDATNVGDEGGFAPNILENK.E   |           |                    |
| 1959.9174                   | 1960.9355 | 6      | 203   | 221 | K.DATNVGDEGGFAPNILENK.E      |           |                    |
| 2661.3108                   | 2662.2097 | -41    | 229   | 253 | K.SAAKAGYTDQVVIQMDVAASEFYR.A |           |                    |
| 2207.0205                   | 2208.0178 | -5     | 234   | 253 | K.AGYTDQVVIQMDVAASEFYR.A     |           | Oxidation (M)      |
| 1527.6841                   | 1528.693  | 1      | 257   | 269 | K.YDLDFKSPDDASR.Y            |           |                    |
| 1438.7344                   | 1439.7467 | 4      | 270   | 281 | R.YITPDQLADLYK.S             |           |                    |
| 1556.7518                   | 1557.7461 | -8     | 359   | 372 | K.LAQSNQWGVVMVSHR.S          |           | Oxidation (M)      |
| 1117.6607                   | 1118.6769 | 8      | 404   | 412 | R.LAKYNOILR.I                |           |                    |
| 805.4446                    | 806.4505  | -2     | 407   | 412 | K.YNOILR.I                   |           |                    |
| 1690.8889                   | 1691.9098 | 8      | 407   | 420 | K.YNOILRIEELGSK.A            |           |                    |
| 903.4549                    | 904.4266  | -39    | 413   | 420 | R.IEELGSK.A                  |           |                    |
| 931.5239                    | 932.5324  | 1      | 427   | 434 | R.SFRNPLAK.-                 |           |                    |

## Spot 29 (P1014-09) – 14-3-3 protein epsilon (Ywhae)

| Spot 29 (P1014-09) Ywhae<br>LCMS/MS (Scaffold) |         |                                                                       |                         |                   |                      |                     |               |                 |                           |              |                     |
|------------------------------------------------|---------|-----------------------------------------------------------------------|-------------------------|-------------------|----------------------|---------------------|---------------|-----------------|---------------------------|--------------|---------------------|
| Sample Name                                    | Acc No. | Protein(s) inferred                                                   | No. Peptides identified | Sequence Coverage | Position in sequence | Peptide Sequence    | Precursor m/z | Charge observed | Calculated mass (neutral) | Mascot score | Mascot Expect value |
| P1014-09                                       | P62260  | sp P62260 14-3-3 protein epsilon<br>Tax_id=101116 [Rattus norvegicus] | 3                       | 14.10%            | 143 - 153            | (K)EAAENSLVAYK(A)   | 597.66        | 2               | 1193.30                   | 53.2         | 1.99E-002           |
|                                                |         |                                                                       |                         |                   | 30 - 42              | (K)VAGMDVELTVEER(N) | 732.10        | 2               | 1462.19                   | 49.9         | 3.88E-002           |
|                                                |         |                                                                       |                         |                   | 1 - 12               | (-)MDDREDLVYQAK(L)  | 762.70        | 2               | 1523.39                   | 52.5         | 2.08E-002           |

| Spot 29 [P1014.9 (75067 Rodent) Ywhae<br>LCMS/MS |          |        |       |     |                       |           |        |                                        |  |  |
|--------------------------------------------------|----------|--------|-------|-----|-----------------------|-----------|--------|----------------------------------------|--|--|
| Calculated                                       | Observed | +/-ppm | start | end | Sequence              | Ion Score | C.I. % | Modification                           |  |  |
| 1523.6926                                        | 762.7021 |        | 1     | 12  | -MDDREDLVYQAK.L       | 52        |        | Acetyl (Protein N-term)                |  |  |
| 1539.6875                                        | 770.7592 |        | 1     | 12  | -MDDREDLVYQAK.L       | 41        |        | Acetyl (Protein N-term); Oxidation (M) |  |  |
| 1539.6875                                        | 771.7377 |        | 1     | 12  | -MDDREDLVYQAK.L       | 24        |        | Acetyl (Protein N-term); Oxidation (M) |  |  |
| 1927.8665                                        | 644.1605 |        | 13    | 26  | K.LAEQAERYDEMVESMK.K  | 21        |        |                                        |  |  |
| 2071.9554                                        | 691.4199 |        | 13    | 29  | K.LAEQAERYDEMVESMKK.V | 9         |        | Oxidation (M)                          |  |  |
| 1574.7974                                        | 526.1412 |        | 29    | 42  | K.VAGMDVELTVEER.N     | 27        |        |                                        |  |  |
| 1462.6974                                        | 732.1017 |        | 30    | 42  | K.VAGMDVELTVEER.N     | 50        |        | Oxidation (M)                          |  |  |
| 1193.5928                                        | 597.6581 |        | 143   | 153 | K.EAAENSLVAYK.A       | 53        |        |                                        |  |  |
| 1288.5419                                        | 645.1182 |        | 245   | 255 | K.EALQDVEDENG.-       | 35        |        |                                        |  |  |

# Spot 30 (E13 20070719) – Ferritin light chain 1 (Ftl1)

SUB (4700 Reflector Spec #1 MC=>BC=>MC[BP = 842.5, 8386] , <<E15\_MS\_1>> 4700 Reflector Spec #1 MC=>BC=>MC[BP = 842.5, 88

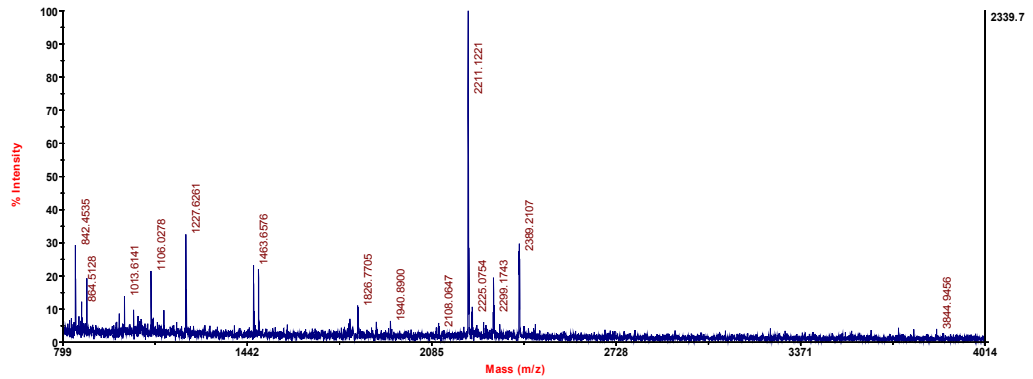

## Spot 30 (20070719-D14) Ftl1

| PMF/MALDI  |           |         |       |     |                            |           |                    |
|------------|-----------|---------|-------|-----|----------------------------|-----------|--------------------|
| Calculated | Observed  | +/- ppm | start | end | Sequence                   | Ion Score | C.I.% Modification |
| 1479.6954  | 1480.6949 | -5      | 7     | 19  | R.QNYSVEEAAVNR.L           |           |                    |
| 863.5341   | 864.5128  | -33     | 20    | 26  | R.LVNLHLR.A                |           |                    |
| 1012.6029  | 1013.6141 | 4       | 66    | 73  | R.LLKLGNER.G               |           |                    |
| 1070.5291  | 1071.5247 | -11     | 145   | 153 | K.MGNHLTLNR.R              |           | Oxidation (M)      |
| 1226.6302  | 1227.6261 | -9      | 145   | 154 | K.MGNHLTLNR.V              |           | Oxidation (M)      |
| 2388.2074  | 2389.2107 | -2      | 155   | 177 | R.VAGPQAQTGVAGASLGEYLFER.L |           |                    |





**Spot 46 (A12 20080606) – mCG11326, isoform CRA\_b [Mus musculus] (Hnrnp3) and or Heterogeneous nuclear ribonucleoprotein H3 [Mus musculus] (MCG11326, isoform CRA\_a) (Hnrnp3)**

SUB (4700 Reflector Spec #1 MC=>BC=>MC[BP = 842.5, 52979] , <<A1\_MS\_1>> 4700 Reflector Spec #1 MC=>BC=>MC[BP = 882.6, 21

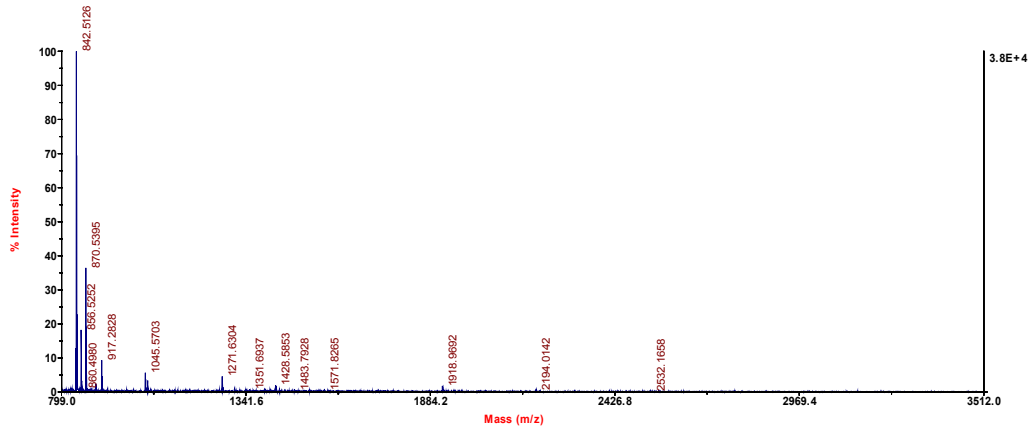

| Spot 46 (20080606.A12) Hnrnp3 (mCG11326, isoform CRA_b) |           |        |       |     |                           |                              |
|---------------------------------------------------------|-----------|--------|-------|-----|---------------------------|------------------------------|
| PMF/MALDI                                               |           |        |       |     |                           |                              |
| Calculated                                              | Observed  | +/-ppm | start | end | Sequence                  |                              |
| 1270.6194                                               | 1271.6304 | 3      | 56    | 67  | R.STGEAFVQFASK.E          | Ion Score C.I.% Modification |
| 839.4541                                                | 840.4634  | 2      | 85    | 90  | R.YIEIFR.S                |                              |
| 1917.9595                                               | 1918.9692 | 2      | 191   | 207 | R.ATENDIANFFSPLNPIR.V     |                              |
| 1051.5411                                               | 1052.5513 | 3      | 208   | 217 | R.VHIDIGADGR.A            |                              |
| 2192.9896                                               | 2194.0142 | 8      | 218   | 236 | R.ATGEADVEFVTHEDAVAAMSK.D | Oxidation (M)                |
| 1427.5736                                               | 1428.5853 | 3      | 273   | 286 | R.DGMDNQGGYGSVGR.M        | Oxidation (M)                |

| Spot 46 (20080606.A12) Hnrnp3 (mCG11326, isoform CRA_a) |           |        |       |     |                           |                              |
|---------------------------------------------------------|-----------|--------|-------|-----|---------------------------|------------------------------|
| PMF/MALDI                                               |           |        |       |     |                           |                              |
| Calculated                                              | Observed  | +/-ppm | start | end | Sequence                  |                              |
| 1270.6194                                               | 1271.6304 | 3      | 56    | 67  | R.STGEAFVQFASK.E          | Ion Score C.I.% Modification |
| 839.4541                                                | 840.4634  | 2      | 85    | 90  | R.YIEIFR.S                |                              |
| 1917.9595                                               | 1918.9692 | 2      | 206   | 222 | R.ATENDIANFFSPLNPIR.V     |                              |
| 1051.5411                                               | 1052.5513 | 3      | 223   | 232 | R.VHIDIGADGR.A            |                              |
| 2192.9896                                               | 2194.0142 | 6      | 233   | 253 | R.ATGEADVEFVTHEDAVAAMSK.D | Oxidation (M)                |
| 1427.5736                                               | 1428.5853 | 3      | 289   | 301 | R.DGMDNQGGYGSVGR.M        | Oxidation (M)                |



| Spot 47 (20080606-B14) Tubb3 |           |        |       |     |                      |           |        |               |  |
|------------------------------|-----------|--------|-------|-----|----------------------|-----------|--------|---------------|--|
| MS•MS/MS                     |           |        |       |     |                      |           |        |               |  |
| Calculated                   | Observed  | +/-ppm | start | end | Sequence             | Ion Score | C.I.%  | Modification  |  |
| 1069.604                     | 1069.6357 | 30     | 310   | 318 | YLTVATVFR            |           |        |               |  |
| 1069.604                     | 1069.6357 | 30     | 310   | 318 | YLTVATVFR            | 34        | 99.945 |               |  |
| 1130.5953                    | 1130.6346 | 35     | 242   | 251 | FPGQLNADLR           |           |        |               |  |
| 1159.6292                    | 1159.6686 | 34     | 253   | 262 | LAVNMVPPFR           |           |        | Oxidation (M) |  |
| 1159.6292                    | 1159.6686 | 34     | 253   | 262 | LAVNMVPPFR           | 8         | 78.035 | Oxidation (M) |  |
| 1245.5933                    | 1245.6399 | 37     | 381   | 390 | ISEQFTAMFR           |           |        | Oxidation (M) |  |
| 1245.5933                    | 1245.6399 | 37     | 381   | 390 | ISEQFTAMFR           | 3         | 29.736 | Oxidation (M) |  |
| 1258.6902                    | 1258.7437 | 43     | 242   | 252 | FPGQLNADLRK          |           |        |               |  |
| 1267.7241                    | 1267.7717 | 37     | 252   | 262 | KLAVNMVPPFR          |           |        | Oxidation (M) |  |
| 1267.7241                    | 1267.7717 | 37     | 252   | 262 | KLAVNMVPPFR          |           |        | Oxidation (M) |  |
| 1401.6943                    | 1401.7499 | 40     | 381   | 391 | ISEQFTAMFRR          |           |        | Oxidation (M) |  |
| 1401.6943                    | 1401.7499 | 40     | 380   | 390 | RISEQFTAMFR          |           |        | Oxidation (M) |  |
| 1406.6831                    | 1406.7379 | 39     | 325   | 336 | EVDEQMLAIQSK         |           |        | Oxidation (M) |  |
| 1620.8354                    | 1620.8877 | 32     | 263   | 276 | LHFFMPGFAPLTAR       |           |        | Oxidation (M) |  |
| 1631.8309                    | 1631.8868 | 34     | 63    | 77  | ALLVDLEPGTMDSVR      |           |        | Oxidation (M) |  |
| 1696.8329                    | 1696.8901 | 34     | 337   | 350 | NSSYFVEWIPNNVK       |           |        | Oxidation (M) |  |
| 1707.8622                    | 1707.9181 | 33     | 283   | 297 | ALTYPELTQQMFDK       |           |        | Oxidation (M) |  |
| 1707.8622                    | 1707.9181 | 33     | 283   | 297 | ALTYPELTQQMFDK       | 3         | 38.378 | Oxidation (M) |  |
| 1912.9552                    | 1912.9902 | 18     | 47    | 62  | ISVYNEASSHKYVPR      |           |        |               |  |
| 1912.9552                    | 1912.9902 | 18     | 47    | 62  | ISVYNEASSHKYVPR      | 16        | 97.023 |               |  |
| 1958.9817                    | 1959.0077 | 13     | 104   | 121 | GHYTEGAEALVDSVLDVVR  |           |        |               |  |
| 2030.0375                    | 2030.061  | 12     | 363   | 380 | MSSTFIGNSTAIQELFKR   | 23        | 99.31  |               |  |
| 2030.0375                    | 2030.061  | 12     | 363   | 380 | MSSTFIGNSTAIQELFKR   |           |        |               |  |
| 2046.0325                    | 2046.0509 | 9      | 363   | 380 | MSSTFIGNSTAIQELFKR   | 30        | 99.876 | Oxidation (M) |  |
| 2046.0325                    | 2046.0509 | 9      | 363   | 380 | MSSTFIGNSTAIQELFKR   |           |        | Oxidation (M) |  |
| 2087.0767                    | 2087.0896 | 6      | 104   | 122 | GHYTEGAEALVDSVLDVVRK | 20        | 98.633 |               |  |
| 2087.0767                    | 2087.0896 | 6      | 104   | 122 | GHYTEGAEALVDSVLDVVRK |           |        |               |  |

| Spot 47 (20080606-B14) Tubb3 |           |        |       |     |                          |           |       |               |  |
|------------------------------|-----------|--------|-------|-----|--------------------------|-----------|-------|---------------|--|
| PMF/MALDI                    |           |        |       |     |                          |           |       |               |  |
| Calculated                   | Observed  | +/-ppm | start | end | Sequence                 | Ion Score | C.I.% | Modification  |  |
| 1396.6623                    | 1397.7332 | 46     | 47    | 58  | R.ISVYNEASSHK.Y          |           |       |               |  |
| 1911.9479                    | 1912.9895 | 18     | 47    | 62  | R.ISVYNEASSHKYVPR.A      |           |       |               |  |
| 1614.8287                    | 1615.882  | 28     | 63    | 77  | R.AILVDLEPGTMDSVR.S      |           |       |               |  |
| 1630.8236                    | 1631.8865 | 34     | 63    | 77  | R.AILVDLEPGTMDSVR.S      |           |       | Oxidation (M) |  |
| 1957.9745                    | 1959.0085 | 14     | 104   | 121 | K.GHYTEGAEALVDSVLDVVR.K  |           |       |               |  |
| 2086.0695                    | 2087.0894 | 6      | 104   | 122 | K.GHYTEGAEALVDSVLDVVRK.E |           |       |               |  |
| 1129.588                     | 1130.6376 | 37     | 242   | 251 | R.FPGQLNADLR.K           |           |       |               |  |
| 1257.683                     | 1258.7448 | 43     | 242   | 252 | R.FPGQLNADLRK.L          |           |       |               |  |
| 1286.7169                    | 1287.7751 | 40     | 252   | 262 | R.KLAVNMVPPFR.L          |           |       | Oxidation (M) |  |
| 1142.627                     | 1143.6765 | 37     | 253   | 262 | K.LAVNMVPPFR.L           |           |       |               |  |
| 1158.6219                    | 1159.6727 | 38     | 253   | 262 | K.LAVNMVPPFR.L           |           |       | Oxidation (M) |  |
| 1619.8283                    | 1620.8884 | 33     | 263   | 276 | R.LHFFMPGFAPLTAR.G       |           |       | Oxidation (M) |  |
| 1706.8549                    | 1707.9186 | 33     | 283   | 297 | R.ALTYPELTQQMFDK.N       |           |       | Oxidation (M) |  |
| 1068.5968                    | 1069.6383 | 32     | 310   | 318 | R.YLTVATVFR.G            |           |       | Oxidation (M) |  |
| 1405.6759                    | 1406.739  | 40     | 325   | 336 | K.EVDEQMLAIQSK.N         |           |       | Oxidation (M) |  |
| 1695.8257                    | 1696.8905 | 34     | 337   | 350 | K.NSSYFVEWIPNNV.V        |           |       |               |  |
| 1872.9291                    | 1873.9821 | 24     | 363   | 379 | K.MSSTFIGNSTAIQELFKR.R   |           |       |               |  |
| 2029.0302                    | 2030.0596 | 11     | 363   | 380 | K.MSSTFIGNSTAIQELFKR.I   |           |       |               |  |
| 2045.0252                    | 2046.0491 | 8      | 363   | 380 | K.MSSTFIGNSTAIQELFKR.I   |           |       | Oxidation (M) |  |
| 1228.591                     | 1229.647  | 40     | 381   | 390 | R.ISEQFTAMFR.R           |           |       |               |  |
| 1244.586                     | 1245.642  | 39     | 381   | 390 | R.ISEQFTAMFR.R           |           |       | Oxidation (M) |  |
| 1400.6871                    | 1401.7511 | 41     | 381   | 391 | R.ISEQFTAMFRR.K          |           |       | Oxidation (M) |  |

| Spot 47 (20080606-B14) Tubb5 |           |        |       |     |                      |           |        |               |  |
|------------------------------|-----------|--------|-------|-----|----------------------|-----------|--------|---------------|--|
| MS•MS/MS                     |           |        |       |     |                      |           |        |               |  |
| Calculated                   | Observed  | +/-ppm | start | end | Sequence             | Ion Score | C.I.%  | Modification  |  |
| 1039.5935                    | 1039.6211 | 27     | 310   | 310 | YLTVAAVFR            | 44        | 99.995 |               |  |
| 1039.5935                    | 1039.6211 | 27     | 310   | 310 | YLTVAAVFR            |           |        |               |  |
| 1130.5953                    | 1130.6346 | 35     | 242   | 242 | FPGQLNADLR           |           |        |               |  |
| 1159.6292                    | 1159.6686 | 34     | 253   | 253 | LAVNMVPPFR           |           |        | Oxidation (M) |  |
| 1159.6292                    | 1159.6686 | 34     | 253   | 253 | LAVNMVPPFR           | 8         | 78.035 | Oxidation (M) |  |
| 1245.5933                    | 1245.6399 | 37     | 381   | 381 | ISEQFTAMFR           |           |        | Oxidation (M) |  |
| 1245.5933                    | 1245.6399 | 37     | 381   | 390 | ISEQFTAMFR           | 3         | 29.736 | Oxidation (M) |  |
| 1258.6902                    | 1258.7437 | 43     | 242   | 252 | FPGQLNADLRK          |           |        |               |  |
| 1267.7241                    | 1267.7717 | 37     | 252   | 262 | KLAVNMVPPFR          |           |        | Oxidation (M) |  |
| 1267.7241                    | 1267.7717 | 37     | 252   | 262 | KLAVNMVPPFR          |           |        | Oxidation (M) |  |
| 1401.6943                    | 1401.7499 | 40     | 381   | 391 | ISEQFTAMFRR          |           |        | Oxidation (M) |  |
| 1401.6943                    | 1401.7499 | 40     | 380   | 390 | RISEQFTAMFR          |           |        | Oxidation (M) |  |
| 1620.8356                    | 1620.8877 | 32     | 263   | 276 | LHFFMPGFAPLTAR       |           |        | Oxidation (M) |  |
| 1631.8309                    | 1631.8868 | 34     | 63    | 77  | ALLVDLEPGTMDSVR      |           |        | Oxidation (M) |  |
| 1636.8304                    | 1636.8895 | 34     | 263   | 276 | LHFFMPGFAPLTAR       |           |        | Oxidation (M) |  |
| 1636.8304                    | 1636.8895 | 34     | 263   | 276 | LHFFMPGFAPLTAR       |           |        | Oxidation (M) |  |
| 1693.8951                    | 1693.9377 | 26     | 283   | 297 | ALTYPELTQQMFDK       |           |        |               |  |
| 1696.8329                    | 1696.8901 | 34     | 337   | 350 | NSSYFVEWIPNNVK       |           |        |               |  |
| 1958.9817                    | 1959.0077 | 13     | 104   | 121 | GHYTEGAEALVDSVLDVVR  |           |        |               |  |
| 2087.0767                    | 2087.0896 | 6      | 104   | 122 | GHYTEGAEALVDSVLDVVRK | 20        | 98.633 |               |  |
| 2087.0767                    | 2087.0896 | 6      | 104   | 122 | GHYTEGAEALVDSVLDVVRK |           |        |               |  |

| Spot 47 (20080606-B14) Tubb5 |           |        |       |     |                         |           |       |                 |  |
|------------------------------|-----------|--------|-------|-----|-------------------------|-----------|-------|-----------------|--|
| PMF/MALDI                    |           |        |       |     |                         |           |       |                 |  |
| Calculated                   | Observed  | +/-ppm | start | end | Sequence                | Ion Score | C.I.% | Modification    |  |
| 1815.9155                    | 1816.9652 | 23     | 47    | 62  | R.ISVYNEATGGKYVPR.A     |           |       |                 |  |
| 1614.8287                    | 1615.882  | 28     | 63    | 77  | R.AILVDLEPGTMDSVR.S     |           |       |                 |  |
| 1630.8236                    | 1631.8865 | 34     | 63    | 77  | R.AILVDLEPGTMDSVR.S     |           |       | Oxidation (M)   |  |
| 1957.9745                    | 1959.0085 | 14     | 104   | 121 | K.GHYTEGAELVDSVLDVVR.K  |           |       |                 |  |
| 2086.0695                    | 2087.0894 | 6      | 104   | 122 | K.GHYTEGAELVDSVLDVVRK.E |           |       |                 |  |
| 1076.525                     | 1077.5687 | 34     | 155   | 162 | K.IREEYPDR.I            |           |       |                 |  |
| 1129.588                     | 1130.6376 | 37     | 242   | 251 | R.FPGQLNADLR.K          |           |       |                 |  |
| 1257.683                     | 1258.7448 | 43     | 242   | 252 | R.FPGQLNADLRK.L         |           |       |                 |  |
| 1286.7169                    | 1287.7751 | 40     | 252   | 262 | R.KLAVNMVFPFR.L         |           |       | Oxidation (M)   |  |
| 1142.627                     | 1143.6765 | 37     | 253   | 262 | K.LAVNMVFPFR.L          |           |       |                 |  |
| 1158.6219                    | 1159.6727 | 38     | 253   | 262 | K.LAVNMVFPFR.L          |           |       | Oxidation (M)   |  |
| 1619.8283                    | 1620.8884 | 33     | 263   | 276 | R.LHFFMPGFAPLTSR.G      |           |       |                 |  |
| 1635.8232                    | 1636.8861 | 34     | 263   | 276 | R.LHFFMPGFAPLTSR.G      |           |       | Oxidation (M)   |  |
| 1658.8879                    | 1659.9366 | 25     | 283   | 297 | R.ALTVPQLTQGVFDAQ.N     |           |       |                 |  |
| 1038.5952                    | 1039.6241 | 30     | 310   | 318 | R.YLTVAAVFR.G           |           |       |                 |  |
| 1970.8747                    | 1971.9418 | 30     | 321   | 336 | R.MSMKEVDEQMLNVGNK.N    |           |       | 3 Oxidation (M) |  |
| 1695.8257                    | 1696.8905 | 34     | 337   | 350 | K.NSSYFVEWIPNNVK.T      |           |       |                 |  |
| 2025.0717                    | 2026.1169 | 19     | 363   | 380 | K.MSATFIGNSTAIQELFKR.I  |           |       |                 |  |
| 2041.0666                    | 2042.0702 | -2     | 363   | 380 | K.MSATFIGNSTAIQELFKR.I  |           |       | Oxidation (M)   |  |
| 1228.591                     | 1229.647  | 40     | 381   | 390 | R.ISEQFTAMFR.R          |           |       |                 |  |
| 1244.586                     | 1245.642  | 39     | 381   | 390 | R.ISEQFTAMFR.R          |           |       | Oxidation (M)   |  |
| 1400.6871                    | 1401.7511 | 41     | 381   | 391 | R.ISEQFTAMFRR.K         |           |       | Oxidation (M)   |  |

| Spot 47 (20080606-B14) Tubb2b |           |        |       |     |                     |           |        |               |  |
|-------------------------------|-----------|--------|-------|-----|---------------------|-----------|--------|---------------|--|
| MS+MS/MS                      |           |        |       |     |                     |           |        |               |  |
| Calculated                    | Observed  | +/-ppm | start | end | Sequence            | Ion Score | C.I.%  | Modification  |  |
| 1130.5953                     | 1130.6346 | 35     | 242   | 251 | FPGQLNADLR          |           |        |               |  |
| 1159.6292                     | 1159.6686 | 34     | 253   | 262 | LAVNMVFPFR          |           |        | Oxidation (M) |  |
| 1159.6292                     | 1159.6686 | 34     | 253   | 262 | LAVNMVFPFR          | 8         | 78.035 | Oxidation (M) |  |
| 1245.5933                     | 1245.6399 | 37     | 381   | 390 | ISEQFTAMFR          |           |        | Oxidation (M) |  |
| 1245.5933                     | 1245.6399 | 37     | 381   | 390 | ISEQFTAMFR          | 3         | 29.736 | Oxidation (M) |  |
| 1258.6902                     | 1258.7437 | 43     | 242   | 252 | FPGQLNADLRK         |           |        |               |  |
| 1287.7241                     | 1287.7717 | 37     | 252   | 262 | KLAVNMVFPFR         |           |        | Oxidation (M) |  |
| 1287.7241                     | 1287.7717 | 37     | 252   | 262 | KLAVNMVFPFR         |           |        | Oxidation (M) |  |
| 1401.6843                     | 1401.7499 | 40     | 381   | 391 | ISEQFTAMFR          |           |        | Oxidation (M) |  |
| 1401.6843                     | 1401.7499 | 40     | 380   | 390 | RISEQFTAMFR         |           |        | Oxidation (M) |  |
| 1620.8356                     | 1620.8877 | 32     | 263   | 276 | LHFFMPGFAPLTSR      |           |        |               |  |
| 1631.8309                     | 1631.8888 | 34     | 63    | 77  | AILVDLEPGTMDSVR     |           |        | Oxidation (M) |  |
| 1636.8304                     | 1636.8855 | 34     | 263   | 276 | LHFFMPGFAPLTSR      |           |        | Oxidation (M) |  |
| 1636.8304                     | 1636.8855 | 34     | 263   | 276 | LHFFMPGFAPLTSR      |           |        | Oxidation (M) |  |
| 1696.8329                     | 1696.8901 | 34     | 337   | 350 | NSSYFVEWIPNNVK      |           |        |               |  |
| 1707.8622                     | 1707.9181 | 33     | 283   | 297 | ALTVPQLTQGMFDSK     |           |        |               |  |
| 1707.8622                     | 1707.9181 | 33     | 283   | 297 | ALTVPQLTQGMFDSK     | 3         | 38.378 |               |  |
| 1958.9817                     | 1959.0077 | 13     | 104   | 121 | GHYTEGAELVDSVLDVVR  |           |        |               |  |
| 2030.0375                     | 2030.061  | 12     | 363   | 380 | MSATFIGNSTAIQELFKR  | 23        | 99.31  | Oxidation (M) |  |
| 2030.0375                     | 2030.061  | 12     | 363   | 380 | MSATFIGNSTAIQELFKR  |           |        | Oxidation (M) |  |
| 2087.0767                     | 2087.0896 | 6      | 104   | 122 | GHYTEGAELVDSVLDVVRK | 20        | 98.633 |               |  |
| 2087.0767                     | 2087.0896 | 6      | 104   | 122 | GHYTEGAELVDSVLDVVRK |           |        |               |  |

| Spot 47 (20080606-B14) Tubb2b |           |        |       |     |                         |           |       |                 |  |
|-------------------------------|-----------|--------|-------|-----|-------------------------|-----------|-------|-----------------|--|
| PMF/MALDI                     |           |        |       |     |                         |           |       |                 |  |
| Calculated                    | Observed  | +/-ppm | start | end | Sequence                | Ion Score | C.I.% | Modification    |  |
| 1614.8287                     | 1615.882  | 28     | 63    | 77  | R.AILVDLEPGTMDSVR.S     |           |       |                 |  |
| 1630.8236                     | 1631.8865 | 34     | 63    | 77  | R.AILVDLEPGTMDSVR.S     |           |       | Oxidation (M)   |  |
| 1957.9745                     | 1959.0085 | 14     | 104   | 121 | K.GHYTEGAELVDSVLDVVR.K  |           |       |                 |  |
| 2086.0695                     | 2087.0894 | 6      | 104   | 122 | K.GHYTEGAELVDSVLDVVRK.E |           |       |                 |  |
| 1076.525                      | 1077.5687 | 34     | 155   | 162 | K.IREEYPDR.I            |           |       |                 |  |
| 1129.588                      | 1130.6376 | 37     | 242   | 251 | R.FPGQLNADLR.K          |           |       |                 |  |
| 1257.683                      | 1258.7448 | 43     | 242   | 252 | R.FPGQLNADLRK.L         |           |       |                 |  |
| 1286.7169                     | 1287.7751 | 40     | 252   | 262 | R.KLAVNMVFPFR.L         |           |       | Oxidation (M)   |  |
| 1142.627                      | 1143.6765 | 37     | 253   | 262 | K.LAVNMVFPFR.L          |           |       |                 |  |
| 1158.6219                     | 1159.6727 | 38     | 253   | 262 | K.LAVNMVFPFR.L          |           |       | Oxidation (M)   |  |
| 1619.8283                     | 1620.8884 | 33     | 263   | 276 | R.LHFFMPGFAPLTSR.G      |           |       |                 |  |
| 1635.8232                     | 1636.8861 | 34     | 263   | 276 | R.LHFFMPGFAPLTSR.G      |           |       | Oxidation (M)   |  |
| 1706.8549                     | 1707.9186 | 33     | 283   | 297 | R.ALTVPQLTQGMFDSK.N     |           |       |                 |  |
| 1722.8498                     | 1723.9098 | 31     | 283   | 297 | R.ALTVPQLTQGMFDSK.N     |           |       | Oxidation (M)   |  |
| 1970.8747                     | 1971.9418 | 30     | 321   | 336 | R.MSMKEVDEQMLNVGNK.N    |           |       | 3 Oxidation (M) |  |
| 1695.8257                     | 1696.8905 | 34     | 337   | 350 | K.NSSYFVEWIPNNVK.T      |           |       |                 |  |
| 1872.9291                     | 1873.9821 | 24     | 363   | 379 | K.MSATFIGNSTAIQELFKR    |           |       | Oxidation (M)   |  |
| 2029.0302                     | 2030.0596 | 11     | 363   | 380 | K.MSATFIGNSTAIQELFKR.I  |           |       | Oxidation (M)   |  |
| 1228.591                      | 1229.647  | 40     | 381   | 390 | R.ISEQFTAMFR.R          |           |       |                 |  |
| 1244.586                      | 1245.642  | 39     | 381   | 390 | R.ISEQFTAMFR.R          |           |       | Oxidation (M)   |  |
| 1400.6871                     | 1401.7511 | 41     | 381   | 391 | R.ISEQFTAMFRR.K         |           |       | Oxidation (M)   |  |

| Spot 47 (20080606-B14) Tubb2a |           |        |       |     |                         |           |       |                 |  |
|-------------------------------|-----------|--------|-------|-----|-------------------------|-----------|-------|-----------------|--|
| PMF/MALDI                     |           |        |       |     |                         |           |       |                 |  |
| Calculated                    | Observed  | +/-ppm | start | end | Sequence                | Ion Score | C.I.% | Modification    |  |
| 1614.8287                     | 1615.882  | 28     | 63    | 77  | R.AILVDLEPGTMDSVR.S     |           |       |                 |  |
| 1630.8236                     | 1631.8865 | 34     | 63    | 77  | R.AILVDLEPGTMDSVR.S     |           |       | Oxidation (M)   |  |
| 1957.9745                     | 1959.0085 | 14     | 104   | 121 | K.GHYTEGAELVDSVLDVVR.K  |           |       |                 |  |
| 2086.0695                     | 2087.0894 | 6      | 104   | 122 | K.GHYTEGAELVDSVLDVVRK.E |           |       |                 |  |
| 1076.525                      | 1077.5687 | 34     | 155   | 162 | K.IREEYPDR.I            |           |       |                 |  |
| 1129.588                      | 1130.6376 | 37     | 242   | 251 | R.FPGQLNADLR.K          |           |       |                 |  |
| 1257.683                      | 1258.7448 | 43     | 242   | 252 | R.FPGQLNADLRK.L         |           |       |                 |  |
| 1286.7169                     | 1287.7751 | 40     | 252   | 262 | R.KLAVNMVFPFR.L         |           |       | Oxidation (M)   |  |
| 1142.627                      | 1143.6765 | 37     | 253   | 262 | K.LAVNMVFPFR.L          |           |       |                 |  |
| 1158.6219                     | 1159.6727 | 38     | 253   | 262 | K.LAVNMVFPFR.L          |           |       | Oxidation (M)   |  |
| 1619.8283                     | 1620.8884 | 33     | 263   | 276 | R.LHFFMPGFAPLTSR.G      |           |       |                 |  |
| 1635.8232                     | 1636.8861 | 34     | 263   | 276 | R.LHFFMPGFAPLTSR.G      |           |       | Oxidation (M)   |  |
| 1706.8549                     | 1707.9186 | 33     | 283   | 297 | R.ALTVPQLTQGMFDSK.N     |           |       |                 |  |
| 1722.8498                     | 1723.9098 | 31     | 283   | 297 | R.ALTVPQLTQGMFDSK.N     |           |       | Oxidation (M)   |  |
| 1970.8747                     | 1971.9418 | 30     | 321   | 336 | R.MSMKEVDEQMLNVGNK.N    |           |       | 3 Oxidation (M) |  |
| 1695.8257                     | 1696.8905 | 34     | 337   | 350 | K.NSSYFVEWIPNNVK.T      |           |       |                 |  |
| 1872.9291                     | 1873.9821 | 24     | 363   | 379 | K.MSATFIGNSTAIQELFKR    |           |       | Oxidation (M)   |  |
| 2029.0302                     | 2030.0596 | 11     | 363   | 380 | K.MSATFIGNSTAIQELFKR.I  |           |       | Oxidation (M)   |  |
| 1228.591                      | 1229.647  | 40     | 381   | 390 | R.ISEQFTAMFR.R          |           |       |                 |  |
| 1244.586                      | 1245.642  | 39     | 381   | 390 | R.ISEQFTAMFR.R          |           |       | Oxidation (M)   |  |
| 1400.6871                     | 1401.7511 | 41     | 381   | 391 | R.ISEQFTAMFRR.K         |           |       | Oxidation (M)   |  |

# Spot 48 (D6 20080606) - Lactate dehydrogenase B (Ldhb)

SUB (4700 Reflector Spec #1 MC=>BC=>MC[BP = 882.6, 5549] , <<C1\_MS\_1>> 4700 Reflector Spec #1 MC=>BC=>MC[BP = 882.6, 673

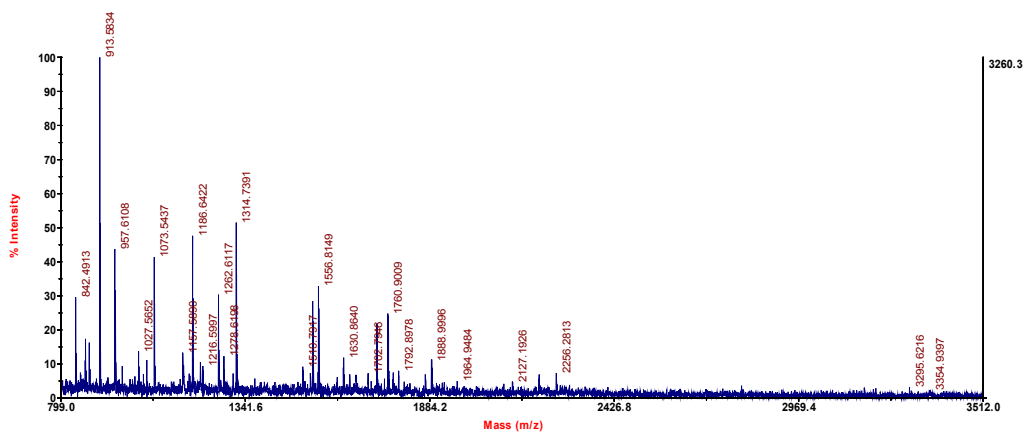

| Spot 48 (20080606-D6) Ldhb |           |        |       |     |                          |           |       |                 |
|----------------------------|-----------|--------|-------|-----|--------------------------|-----------|-------|-----------------|
| PMF/MALDI                  |           |        |       |     |                          |           |       |                 |
| Calculated                 | Observed  | +/-ppm | start | end | Sequence                 | Ion Score | C.I.% | Modification    |
| 1665.8573                  | 1666.8582 | -4     | 8     | 23  | K.LIAPVADDETAVPNNK.I     |           |       |                 |
| 1628.8509                  | 1629.8608 | 2      | 44    | 58  | K.SLADELALVDVLEDK.L      |           |       |                 |
| 1870.0299                  | 1871.0557 | 10     | 44    | 60  | K.SLADELALVDVLEDK.L.G    |           |       |                 |
| 2204.097                   | 2205.1138 | 4      | 59    | 77  | K.LKGEMMDLGHGSLFLGTPK.I  |           |       | 2 Oxidation (M) |
| 1509.7675                  | 1510.7917 | 11     | 78    | 91  | K.IVADKDYVTANSK.I        |           |       |                 |
| 912.5757                   | 913.5834  | 1      | 92    | 100 | K.IVVVTAGV.R.Q           |           |       |                 |
| 1726.9326                  | 1727.9368 | -2     | 92    | 107 | K.IVVVTAGV.R.QEGES.R.L   |           |       |                 |
| 1555.8086                  | 1556.8149 | 1      | 101   | 113 | R.QQEGESRLNLVQR.N        |           |       |                 |
| 956.6059                   | 957.6108  | -2     | 120   | 127 | K.FIIPQIVK.Y             |           |       |                 |
| 1072.5375                  | 1073.5437 | -1     | 171   | 178 | R.FRYLMAEK.L             |           |       | Oxidation (M)   |
| 1761.8971                  | 1762.9047 | 0      | 230   | 244 | K.EVHKMVDVSAYEVK.L       |           |       | Oxidation (M)   |
| 1026.5532                  | 1027.5652 | 5      | 271   | 279 | R.IHPVSTMV.K.G           |           |       | Oxidation (M)   |
| 958.5447                   | 959.5489  | -3     | 300   | 308 | R.GLTSVINGK.L            |           |       |                 |
| 2126.1695                  | 2127.1926 | 7      | 300   | 318 | R.GLTSVINGK.LKDDEVAQLR.K |           |       |                 |
| 1185.6353                  | 1186.6422 | 0      | 309   | 318 | K.LKDDEVAQLR.K           |           |       |                 |
| 1313.7303                  | 1314.7391 | 1      | 309   | 319 | K.LKDDEVAQLR.K.S         |           |       |                 |
| 1175.5822                  | 1176.5886 | -1     | 320   | 329 | K.SADTLWDIGK.D           |           |       |                 |
| 1531.7882                  | 1532.7867 | -6     | 320   | 332 | K.SADTLWDIGKDLK.D        |           |       |                 |
| 1759.8992                  | 1760.9009 | -3     | 320   | 334 | K.SADTLWDIGKDLKDL.-      |           |       |                 |

# Spot 54 (E9 20070719) – Protein DJ-1 (Park 7, Cap1)

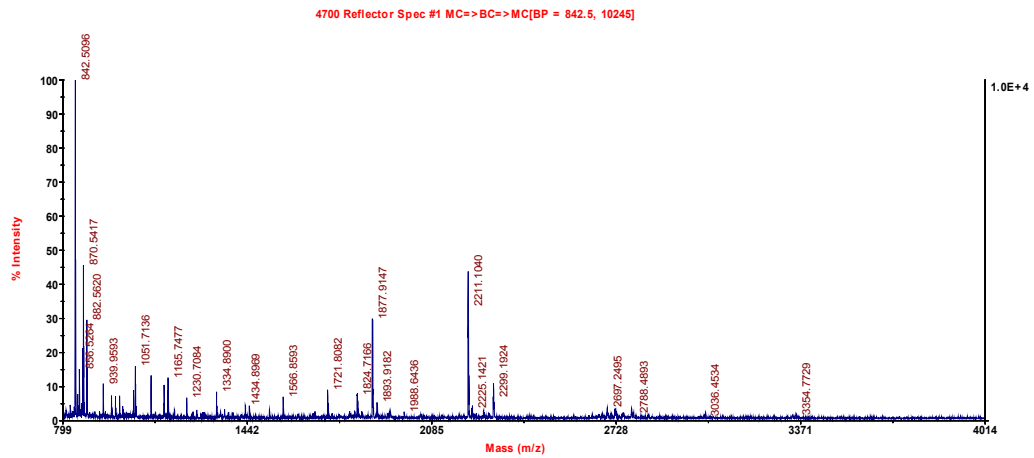

| Spot 54 (20070719-E9) Park7/Cap1 |           |        |       |     |                                 |                 |
|----------------------------------|-----------|--------|-------|-----|---------------------------------|-----------------|
| PMF/MALDI                        |           |        |       |     |                                 |                 |
| Calculated                       | Observed  | +/-ppm | start | end | Sequence                        |                 |
| 1720.8012                        | 1721.8082 | 0      | 13    | 27  | K.GAEEMETVIPVDIMR.R             |                 |
| 1876.9023                        | 1877.9147 | 3      | 13    | 26  | K.GAEEMETVIPVDIMRR.A            | 2 Oxidation (M) |
| 2725.4267                        | 2726.3196 | -43    | 63    | 89  | K.TQGPYDVVLPGGNLGAGNLSALVK.E    | 2 Oxidation (M) |
| 1157.604                         | 1158.6464 | 30     | 90    | 98  | K.EILKEQENR.K                   |                 |
| 1285.699                         | 1286.7001 | -5     | 90    | 99  | K.EILKEQENR.K                   |                 |
| 851.4865                         | 852.5152  | 25     | 123   | 130 | K.VTSHPLAK.D                    |                 |
| 1229.6979                        | 1230.7084 | 3      | 146   | 156 | R.VEKDGLILTSR.G                 |                 |
| 873.492                          | 874.5032  | 4      | 149   | 156 | K.DGLILTSR.G                    |                 |
| 1892.9864                        | 1893.9182 | -41    | 157   | 175 | R.GPGTSFEFALAIVEALSGK.D         |                 |
| 2695.3527                        | 2696.2808 | -29    | 157   | 182 | R.GPGTSFEFALAIVEALSGKDMANQV.K.A | Oxidation (M)   |

# Spot 57 (A22 20080606) - Inner membrane protein, mitochondrial, isoform CRA\_a (Immt)

SUB (4700 Reflector Spec #1 MC=>BC=>MC[BP] = 842.5, 59476) , <<A1\_MS\_1>> 4700 Reflector Spec #1 MC=>BC=>MC[BP] = 882.6, 21

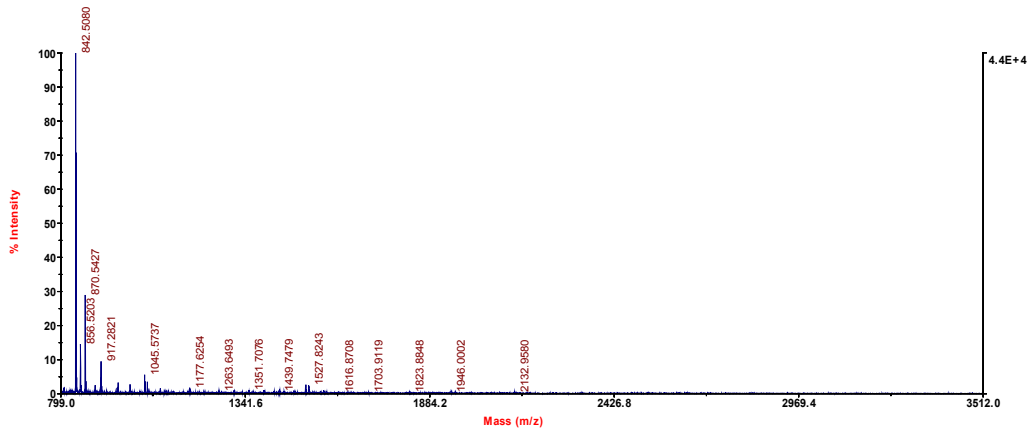

| Spot 57 (20080606.A22) Immt (isoform CRA_a) |           |        |       |     |                         |               |
|---------------------------------------------|-----------|--------|-------|-----|-------------------------|---------------|
| PMF/MALDI                                   |           |        |       |     |                         |               |
| Calculated                                  | Observed  | +/-ppm | start | end | Sequence                |               |
| 1394.6929                                   | 1395.7205 | 15     | 73    | 84  | R.ESVEKTIPYSDK.L        |               |
| 966.5862                                    | 967.5955  | -2     | 102   | 110 | K.KPIQSGPLK.I           |               |
| 1306.6075                                   | 1307.6754 | 46     | 196   | 206 | K.QEQVEMESLAK.S         | Oxidation (M) |
| 1517.7685                                   | 1518.7817 | 4      | 207   | 220 | K.SLEDALNGTATVTR.Q      |               |
| 1001.5505                                   | 1002.559  | 1      | 260   | 268 | R.TVEGALKER.R           |               |
| 1526.8205                                   | 1527.8243 | -2     | 338   | 350 | K.VVSGYHELVQAR.D        |               |
| 1570.7879                                   | 1571.833  | 24     | 356   | 369 | K.ELDSITPDITPGWK.G      |               |
| 1454.7841                                   | 1455.8057 | 10     | 391   | 402 | R.IDQLNRELAQQK.A        |               |
| 963.5138                                    | 964.5222  | 1      | 422   | 430 | K.RAFDSAVAK.A           |               |
| 807.4127                                    | 808.4177  | -3     | 423   | 430 | R.AFDSAVAK.A            |               |
| 1442.7266                                   | 1443.8011 | 47     | 496   | 506 | K.LSEGELEFHRR.S         |               |
| 2131.948                                    | 2132.958  | 1      | 507   | 524 | R.SQEQMDNFTLDINTAYAR.L  | Oxidation (M) |
| 1822.8809                                   | 1823.8848 | -2     | 527   | 543 | R.GIEQAVQSHAVAEER.K     |               |
| 1944.9826                                   | 1946.0002 | 5      | 561   | 579 | K.TSSAEMPTIPLGSAVEAIR.V | Oxidation (M) |
| 1052.5138                                   | 1053.5222 | 1      | 603   | 611 | R.GVYSEETLR.A           |               |
| 1176.6251                                   | 1177.6254 | -6     | 688   | 697 | K.FVNOLKGESR.R          |               |



# Spot 59 (D14 20080606) - Protein phosphatase 2A, regulatory subunit B (PR 53) (Ppp2r4)

SUB (4700 Reflector Spec #1 MC=>BC=>MC[BP = 842.5, 55745] , <<C1\_MS\_1>> 4700 Reflector Spec #1 MC=>BC=>MC[BP = 882.6, 67

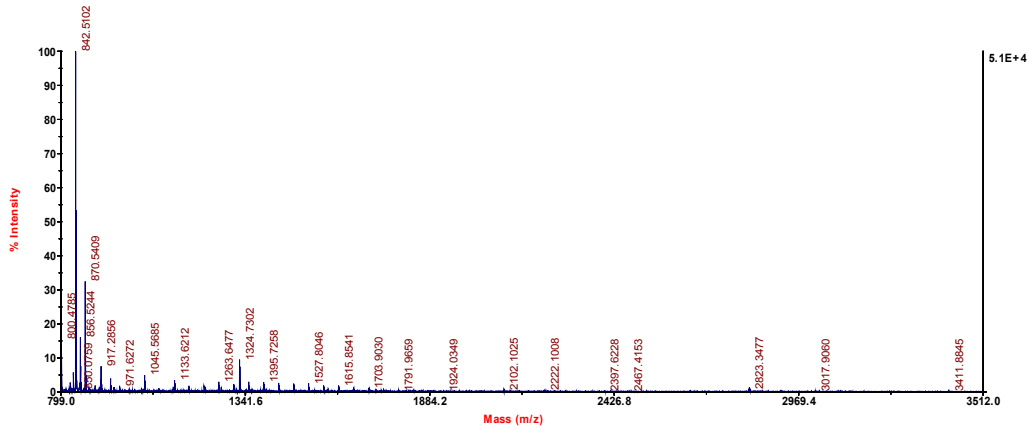

| Spot 59 (20080606.D14) Ppp2r4 |           |        |       |     |                         |           |       |               |  |
|-------------------------------|-----------|--------|-------|-----|-------------------------|-----------|-------|---------------|--|
| PMF/MALDI                     |           |        |       |     |                         |           |       |               |  |
| Calculated                    | Observed  | +/-ppm | start | end | Sequence                | Ion Score | C.I.% | Modification  |  |
| 2238.1056                     | 2239.0869 | -12    | 7     | 27  | R.QPPDSEETPSATPTFIIPK.K |           |       |               |  |
| 1269.6387                     | 1270.6415 | -4     | 28    | 38  | K.KEIHVPDMGK.W          |           |       | Oxidation (M) |  |
| 1141.5438                     | 1142.5446 | -6     | 29    | 38  | K.EIHVPDMGK.W           |           |       | Oxidation (M) |  |
| 2101.0732                     | 2102.0969 | 8      | 42    | 60  | R.SQAYADYIGFILTLNEGK.G  |           |       |               |  |
| 913.4909                      | 914.4963  | -2     | 63    | 69  | K.KLTFDYK.V             |           |       |               |  |
| 1127.655                      | 1128.6655 | 3      | 77    | 86  | K.LVALLDLDR.W           |           |       |               |  |
| 854.4399                      | 855.4548  | 9      | 100   | 106 | R.FGNKAYR.T             |           |       |               |  |
| 832.4039                      | 833.4106  | -1     | 141   | 148 | K.EAVGNSTR.I            |           |       |               |  |
| 1132.6128                     | 1133.6224 | 2      | 174   | 183 | R.VDDGVAVFK.V           |           |       |               |  |
| 1326.6754                     | 1327.7374 | 41     | 184   | 193 | K.VFDRYLEVMR.K          |           |       |               |  |
| 825.4055                      | 826.4168  | 5      | 188   | 193 | R.YLEVMR.K              |           |       | Oxidation (M) |  |
| 953.5004                      | 954.5128  | 5      | 188   | 194 | R.YLEVMRK.L             |           |       | Oxidation (M) |  |
| 1220.6699                     | 1221.6624 | -12    | 267   | 296 | K.VNQGIRMK.A            |           |       |               |  |
| 1014.5651                     | 1015.5662 | -6     | 303   | 310 | K.FPVIQHF.K.F           |           |       |               |  |
| 1323.7187                     | 1324.7302 | 3      | 311   | 323 | K.FGSLPIHPVTSG.-        |           |       |               |  |

# Spot 62 (E4 20070719) – Glutathione S-transferase Mu 5 (Gstm5)

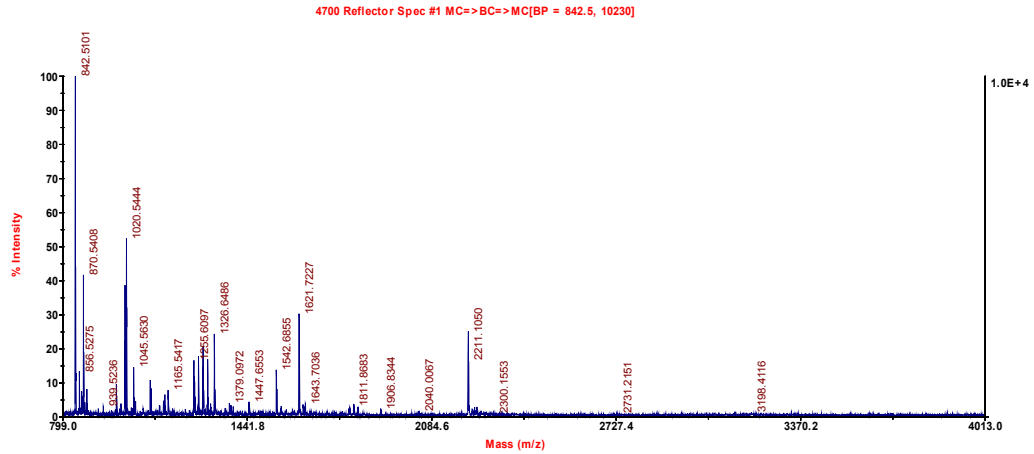

| Spot 62 (20070719.E4) Gstm5 |           |        |       |     |                    |                 |
|-----------------------------|-----------|--------|-------|-----|--------------------|-----------------|
| PMF/MALDI                   |           |        |       |     |                    |                 |
| Calculated                  | Observed  | +/-ppm | start | end | Sequence           |                 |
| 1254.6067                   | 1255.6097 | -3     | 6     | 15  | K.SMVLGYWDIR.G     |                 |
| 1604.728                    | 1605.7363 | 1      | 23    | 35  | R.MLLEFTDTSYEEK.Q  | Oxidation (M)   |
| 1620.7229                   | 1621.7227 | -5     | 23    | 35  | R.MLLEFTDTSYEEK.Q  |                 |
| 874.4549                    | 875.4564  | -7     | 48    | 54  | R.SQWLDV.K.F       | Oxidation (M)   |
| 1256.72                     | 1257.7225 | -4     | 72    | 82  | K.NKITGSNAILR.Y    |                 |
| 1014.5822                   | 1015.5909 | 1      | 74    | 82  | K.ITGSNAILR.Y      |                 |
| 1634.6664                   | 1635.7501 | 47     | 88    | 100 | K.HNMC.GDTEEEKIR.V | Oxidation (M)   |
| 1810.8706                   | 1811.8683 | -5     | 99    | 112 | K.IRVDIMENQIMDFR.M | 2 Oxidation (M) |
| 1541.6854                   | 1542.6855 | -5     | 101   | 112 | R.VDIMENQIMDFR.M   | 2 Oxidation (M) |
| 938.5226                    | 939.5236  | -7     | 141   | 148 | K.QFSLFLGK.F       |                 |
| 984.4705                    | 985.4709  | -7     | 149   | 156 | K.FTWFLGK.L        |                 |
| 1019.54                     | 1020.5444 | -3     | 198   | 206 | K.IAAFLGSDR.C      |                 |
| 1077.5311                   | 1078.5499 | 11     | 210   | 218 | K.MPINNKMAK.W      | 2 Oxidation (M) |

# Spot 63 (D8 20080815) – Leucine zipper transcription factor-like protein 1 (Lztf11)

4700 Reflector Spec #1 MC=>BC=>MC[BP = 842.5, 58853]

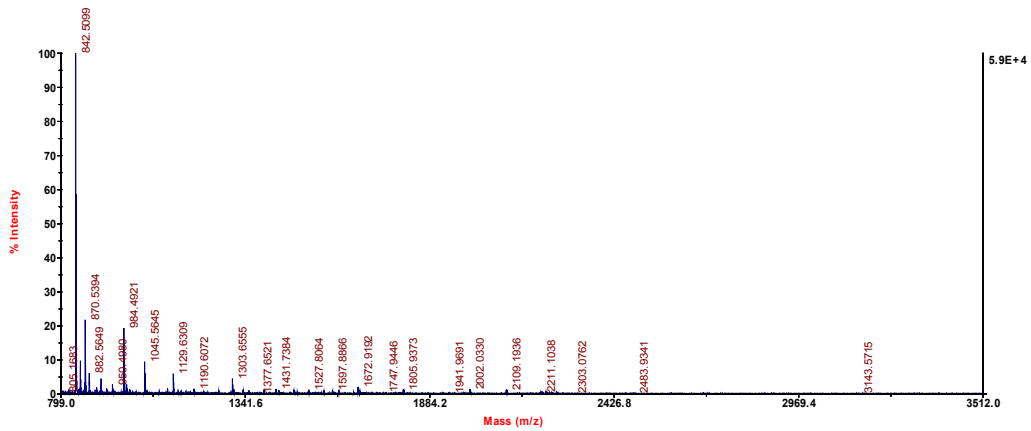

| Spot 63 (20080815-D8) Lztf11 |           |        |       |     |                     |           |        |               |  |
|------------------------------|-----------|--------|-------|-----|---------------------|-----------|--------|---------------|--|
| MS+MS/MS                     |           |        |       |     |                     |           |        |               |  |
| Calculated                   | Observed  | +/-ppm | start | end | Sequence            | Ion Score | C.I. % | Modification  |  |
| 950.4941                     | 950.4993  | 5      | 86    | 93  | QLFSQAEK            |           |        |               |  |
| 950.4941                     | 950.4993  | 5      | 86    | 93  | QLFSQAEK            |           |        |               |  |
| 954.4414                     | 954.4524  | 12     | 292   | 299 | LAKYESED            |           |        |               |  |
| 984.4897                     | 984.4936  | 4      | 265   | 272 | FQQTAAAYR           |           |        |               |  |
| 984.4897                     | 984.4936  | 4      | 265   | 272 | FQQTAAAYR           | 11        | 89.653 |               |  |
| 992.5444                     | 992.5486  | 4      | 273   | 280 | NMKEILTK            | 0         | 0      | Oxidation (M) |  |
| 992.5444                     | 992.5486  | 4      | 273   | 280 | NMKEILTK            |           |        |               |  |
| 1001.5374                    | 1001.5446 | 7      | 262   | 269 | NDQIKDLR            |           |        |               |  |
| 1045.5524                    | 1045.5641 | 11     | 235   | 244 | SLEENLAAAK          |           |        |               |  |
| 1112.5847                    | 1112.5924 | 7      | 264   | 272 | KFQQTAAAYR          |           |        |               |  |
| 1129.6212                    | 1129.6324 | 10     | 157   | 165 | LOGENEKLIK          |           |        |               |  |
| 1129.6212                    | 1129.6324 | 10     | 157   | 165 | LOGENEKLIK          | 14        | 94.79  |               |  |
| 1190.6012                    | 1190.609  | 7      | 225   | 234 | TLNDKTENQK          |           |        |               |  |
| 1190.6012                    | 1190.609  | 7      | 225   | 234 | TLNDKTENQK          |           |        |               |  |
| 1303.6488                    | 1303.6569 | 6      | 98    | 108 | LQTDVSELENR         |           |        |               |  |
| 1303.6488                    | 1303.6569 | 6      | 98    | 108 | LQTDVSELENR         | 39        | 99.983 |               |  |
| 1334.6838                    | 1334.6913 | 6      | 109   | 119 | ELLEQVAEFEK         |           |        |               |  |
| 1431.7325                    | 1431.7405 | 6      | 170   | 182 | TIETQAVNALDEK       |           |        |               |  |
| 1597.8795                    | 1597.8882 | 5      | 138   | 152 | LVPINEGGTTELLNK     |           |        |               |  |
| 1615.8174                    | 1615.849  | 20     | 205   | 219 | AQDLDLENTVAALK      |           |        |               |  |
| 1672.9116                    | 1672.9194 | 5      | 168   | 182 | LKTIETQAVNALDEK     | 18        | 98.015 |               |  |
| 1672.9116                    | 1672.9194 | 5      | 168   | 182 | LKTIETQAVNALDEK     |           |        |               |  |
| 1677.9363                    | 1677.9435 | 4      | 250   | 263 | VOEQLSMAEKELEK      |           |        | Oxidation (M) |  |
| 2002.024                     | 2002.0345 | 5      | 188   | 204 | VLQDLQLDQGNQDFIK    |           |        |               |  |
| 2002.024                     | 2002.0345 | 5      | 188   | 204 | VLQDLQLDQGNQDFIK    | 1         | 0      |               |  |
| 2109.1914                    | 2109.1963 | 2      | 138   | 156 | LVPINEGGTTELLNKEILR |           |        |               |  |
| 2109.1914                    | 2109.1963 | 2      | 138   | 156 | LVPINEGGTTELLNKEILR | 30        | 99.87  |               |  |

| Spot 63 (20080815-D8) Lztf11 |           |        |       |     |                         |           |        |               |  |
|------------------------------|-----------|--------|-------|-----|-------------------------|-----------|--------|---------------|--|
| PMF/MALDI                    |           |        |       |     |                         |           |        |               |  |
| Calculated                   | Observed  | +/-ppm | start | end | Sequence                | Ion Score | C.I. % | Modification  |  |
| 1825.888                     | 1826.844  | -26    | 29    | 43  | R LKTVDSFCFDLKEISR.L    |           |        |               |  |
| 949.4869                     | 950.498   | 4      | 86    | 93  | R QLFSQAEK.W            |           |        |               |  |
| 1302.6415                    | 1303.6555 | 5      | 98    | 108 | K LQTDVSELENR.E         |           |        |               |  |
| 1333.6765                    | 1334.6891 | 4      | 109   | 119 | R ELLEQVAEFEK.A         |           |        |               |  |
| 1596.8723                    | 1597.8866 | 4      | 138   | 152 | K LVPINEGGTTELLNK.E     |           |        |               |  |
| 2109.1841                    | 2109.1936 | 1      | 138   | 156 | K LVPINEGGTTELLNKEILR.L |           |        |               |  |
| 1671.9043                    | 1672.9192 | 5      | 168   | 182 | R LKTIETQAVNALDEK.S     |           |        |               |  |
| 1430.7253                    | 1431.7384 | 4      | 170   | 182 | K TIETQAVNALDEK.S       |           |        |               |  |
| 2001.0167                    | 2002.033  | 4      | 188   | 204 | R VLQDLQLDQGNQDFIK.A    |           |        |               |  |
| 1614.8101                    | 1615.8475 | 19     | 205   | 219 | K AQDLDLENTVAALK.S      |           |        |               |  |
| 2234.1066                    | 2235.1006 | -6     | 205   | 224 | K AQDLDLENTVAALKSEFGK.T |           |        |               |  |
| 1189.5939                    | 1190.6072 | 5      | 225   | 234 | K TLNDKTENQK.S          |           |        |               |  |
| 1044.5451                    | 1045.5645 | 12     | 235   | 244 | K SLEENLAAAK.H          |           |        |               |  |
| 1177.5649                    | 1178.595  | 19     | 250   | 259 | R VOEQLSMAEK.E          |           |        | Oxidation (M) |  |
| 1676.8291                    | 1677.8413 | 3      | 250   | 263 | R VOEQLSMAEKELEK.K      |           |        | Oxidation (M) |  |
| 1804.924                     | 1805.9373 | 3      | 250   | 264 | R VOEQLSMAEKELEK.F      |           |        | Oxidation (M) |  |
| 1111.5774                    | 1112.5927 | 7      | 264   | 272 | K KFQQTAAAYR.N          |           |        |               |  |
| 1484.7558                    | 1485.7847 | 15     | 264   | 275 | K KFQQTAAAYRNMK.E       |           |        |               |  |
| 983.4825                     | 984.4921  | 2      | 265   | 272 | K FQQTAAAYR.N           |           |        |               |  |
| 1941.0142                    | 1941.9691 | -27    | 265   | 280 | K FQQTAAAYRNKKEILTK.K   |           |        |               |  |
| 1957.0091                    | 1957.9229 | -48    | 265   | 280 | K FQQTAAAYRNKKEILTK.K   |           |        | Oxidation (M) |  |
| 991.5372                     | 992.5472  | 3      | 273   | 280 | R NMKEILTK.K            |           |        | Oxidation (M) |  |
| 1000.5301                    | 1001.5446 | 7      | 262   | 269 | K NDQIKDLR.K            |           |        |               |  |
| 1128.6251                    | 1129.6309 | -1     | 262   | 290 | K NDQIKDLRK.R           |           |        |               |  |
| 1109.5363                    | 1110.55   | 7      | 291   | 299 | K RLAKYESED.-           |           |        |               |  |
| 953.4342                     | 954.4532  | 12     | 292   | 299 | R LAKYESED.-            |           |        |               |  |

## Spot 63 (A5 20080606) - Actin, cytoplasmic 2 (Actg1)

SUB (4700 Reflector Spec #1 MC=>BC=>MC[BP = 842.5, 70698] , <<A1\_MS\_1>> 4700 Reflector Spec #1 MC=>BC=>MC[BP = 882.6, 21

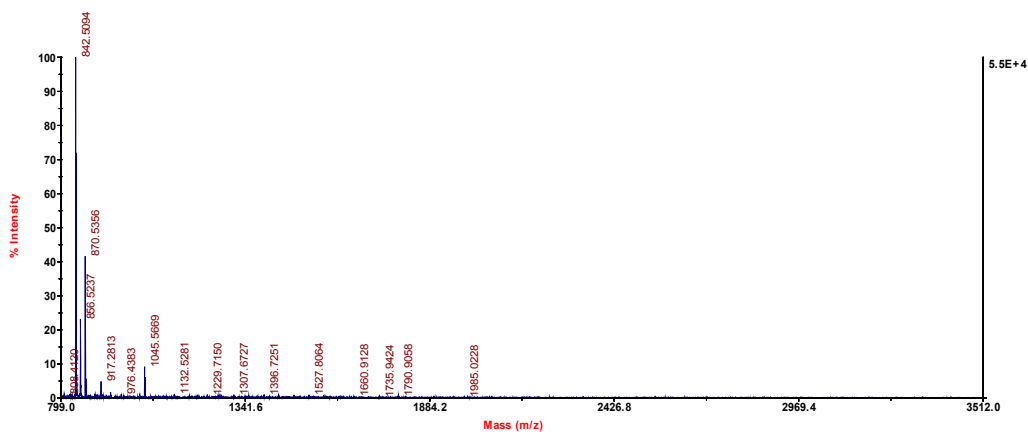

| Spot 63 (20080606.A5) Actg1 |           |        |       |     |                  |                 |
|-----------------------------|-----------|--------|-------|-----|------------------|-----------------|
| MS+MS/MS                    |           |        |       |     |                  |                 |
| Calculated                  | Observed  | +/-ppm | start | end | Sequence         |                 |
| 923.5672                    | 923.5668  | 0      | 329   | 336 | IIAPPERK         |                 |
| 976.4482                    | 976.4392  | -9     | 19    | 26  | AGFAGDDAPR       |                 |
| 976.4482                    | 976.4392  | -9     | 19    | 26  | AGFAGDDAPR       | 26              |
| 1132.527                    | 1132.5323 | 5      | 197   | 206 | GYSFTTAAER       | 99.611          |
| 1177.6133                   | 1177.6042 | -8     | 316   | 326 | EITALAPSTMK      |                 |
| 1203.5609                   | 1203.5585 | -2     | 40    | 50  | HQGVVMVGMGQK     | Oxidation (M)   |
| 1790.8918                   | 1790.9001 | 5      | 239   | 254 | SYELPDGQVITIGNER | 2 Oxidation (M) |
| 1790.8918                   | 1790.9001 | 5      | 239   | 254 | SYELPDGQVITIGNER |                 |

## Spot 63 (A4 20080606) - Galactokinase 1 (Galk1)

SUB (4700 Reflector Spec #1 MC=>BC=>MC[BP = 842.5, 72031] , <<A1\_MS\_1>> 4700 Reflector Spec #1 MC=>BC=>MC[BP = 882.6, 21

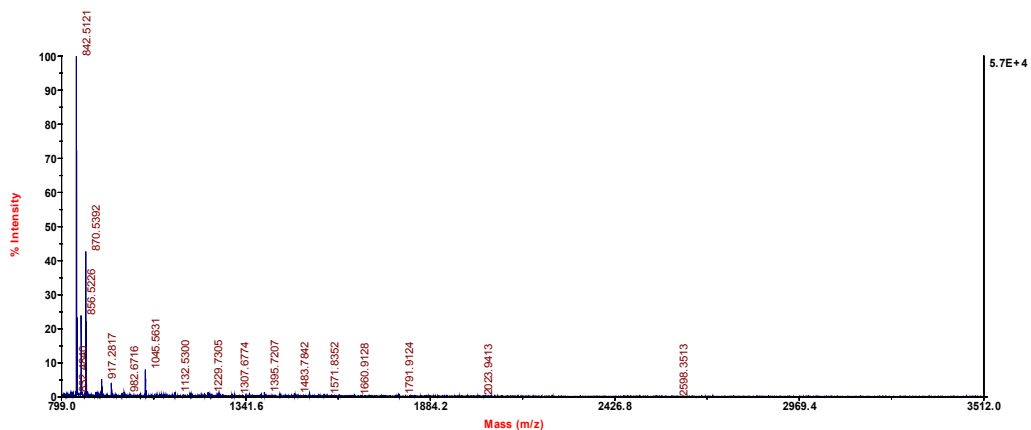

| Spot 63 (20080606.A4) Galk1 |           |        |       |     |                       |               |
|-----------------------------|-----------|--------|-------|-----|-----------------------|---------------|
| PMF/MALDI                   |           |        |       |     |                       |               |
| Calculated                  | Observed  | +/-ppm | start | end | Sequence              |               |
| 1028.5502                   | 1029.556  | -1     | 9     | 17  | R.VEELLAEAR R         |               |
| 2022.9357                   | 2023.9412 | -1     | 19    | 37  | R.AFMEEFGAEPALVAPGR.V | Oxidation (M) |
| 1233.6816                   | 1234.6881 | -1     | 69    | 80  | R.IDGLVSLTTSK.D       |               |
| 1384.7449                   | 1385.7507 | -1     | 205   | 217 | R.SLETSLVPLSDPK.L     |               |
| 1228.7139                   | 1229.7305 | 8      | 218   | 228 | K.LTVLITNSNVR.H       |               |
| 1258.6306                   | 1259.632  | -5     | 229   | 239 | R.HSLASSEYPIR.R       |               |
| 944.5039                    | 945.512   | 1      | 288   | 297 | R.TAQGAAALSR.G        |               |

# Spot 64 (E12 20070719) – Ferritin light chain 1 (Ftl1)

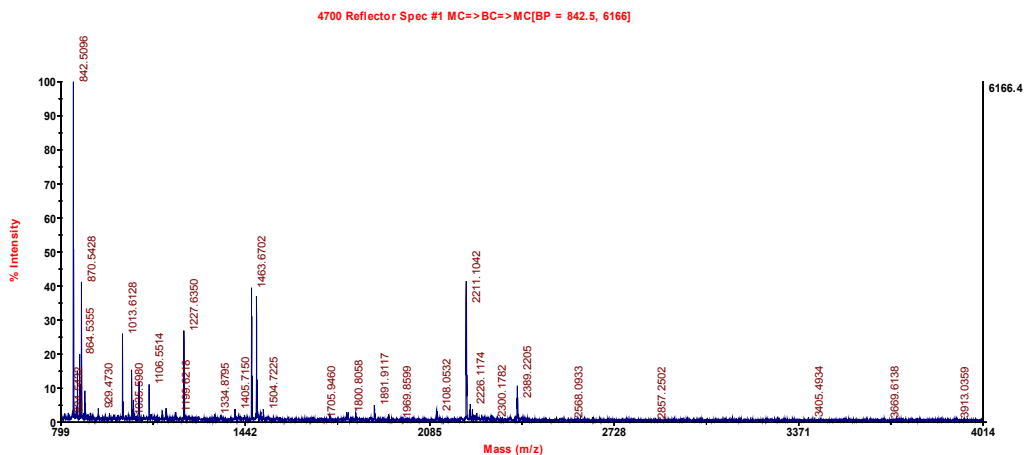

| Spot 64 (20070719-E12) Fd1 |           |        |       |     |               |           |
|----------------------------|-----------|--------|-------|-----|---------------|-----------|
| MS•MS/MS                   |           |        |       |     |               |           |
| Calculated                 | Observed  | +/-ppm | start | end | Sequence      | Ion Score |
| 864.5413                   | 864.5333  | -9     | 19    | 25  | LVNLHLR       |           |
| 864.5413                   | 864.5333  | -9     | 19    | 25  | LVNLHLR       |           |
| 929.4911                   | 929.4706  | -22    | 68    | 75  | LQNERGGR      |           |
| 1013.6102                  | 1013.6099 | 0      | 65    | 72  | LLKLNQR       |           |
| 1013.6102                  | 1013.6099 | 0      | 65    | 72  | LLKLNQR       | 19        |
| 1071.5364                  | 1071.5326 | -4     | 144   | 152 | MGNHLTNLR     | 96.681    |
| 1071.5364                  | 1071.5326 | -4     | 144   | 152 | MGNHLTNLR     |           |
| 1199.6313                  | 1199.6202 | -9     | 143   | 152 | KMGNHLTNLR    |           |
| 1227.6375                  | 1227.6312 | -5     | 144   | 153 | MGNHLTNLRR    |           |
| 1227.6375                  | 1227.6312 | -5     | 144   | 153 | MGNHLTNLRR    | 12        |
| 1405.7242                  | 1405.7131 | -8     | 92    | 104 | TLEAMEAALALEK | 92.9      |
| 1480.7026                  | 1480.6964 | -4     | 6     | 18  | QNYSTEVEAAVNR |           |
| 1480.7026                  | 1480.6964 | -4     | 6     | 18  | QNYSTEVEAAVNR | 27        |
|                            |           |        |       |     |               | 99.77     |

| Spot 64 (20070719-E12) Fd1 |           |        |       |     |                             |           |
|----------------------------|-----------|--------|-------|-----|-----------------------------|-----------|
| PMF/MALDI                  |           |        |       |     |                             |           |
| Calculated                 | Observed  | +/-ppm | start | end | Sequence                    | Ion Score |
| 1479.6954                  | 1480.6982 | -3     | 7     | 19  | R.QNYSTEVEAAVNR.L           |           |
| 863.5341                   | 864.5355  | -7     | 20    | 26  | R.LVNLHLR.A                 |           |
| 1012.6029                  | 1013.6128 | 3      | 66    | 73  | R.LLKLNQR.G                 |           |
| 928.4839                   | 929.473   | -20    | 69    | 76  | K.LQNERGGR.A                |           |
| 1404.717                   | 1405.715  | -7     | 93    | 105 | K.TLEAMEAALALEK.N           |           |
| 1704.9271                  | 1705.946  | 7      | 106   | 121 | K.NLNQALLDLHALGSAR.T        |           |
| 1198.6241                  | 1199.6218 | -8     | 144   | 153 | K.KMGNHLTNLR.R              |           |
| 1070.5291                  | 1071.5363 | 0      | 145   | 153 | K.MGNHLTNLR.R               |           |
| 1226.6302                  | 1227.635  | -2     | 145   | 154 | K.MGNHLTNLRR.V              |           |
| 2388.2074                  | 2389.2207 | 3      | 155   | 177 | R.VAGPQPAQTGVAQASLGEYLFER.L |           |

## Spot 68 (P1014-11) – Diablo homolog (Drosophila) (larger C-terminal fragment) (Diablo)

| Spot 68 (P1014-11) Diablo<br>LCMS/MS (Scaffold) |         |                                                                        |                         |                   |                      |                              |               |                 |                           |              |                     |
|-------------------------------------------------|---------|------------------------------------------------------------------------|-------------------------|-------------------|----------------------|------------------------------|---------------|-----------------|---------------------------|--------------|---------------------|
| Sample Name                                     | Acc No. | Proteins(s) inferred                                                   | No. Peptides identified | Sequence Coverage | Position in sequence | Peptide Sequence             | Precursor m/z | Charge observed | Calculated mass (neutral) | Mascot score | Mascot Expect value |
| P1014-11                                        | Q5RK17  | tr Q5RK17 Diablo homolog (Drosophila) Tax_id=10116 [Rattus norvegicus] | 6                       | 19.00%            | 206 - 215            | (K)LAEVQTQELR(Q)             | 593.70        | 2               | 1185.39                   | 89.0         | 5.48E-006           |
|                                                 |         |                                                                        |                         |                   | 61 - 73              | (K)SEPOSLSNEALMR(R)          | 732.14        | 2               | 1462.27                   | 52.2         | 2.29E-002           |
|                                                 |         |                                                                        |                         |                   | 218 - 237            | (K)TQEASDEAADQEEEEAYLRD(-)   | 767.06        | 3               | 2298.16                   | 40.5         | 3.30E-001           |
|                                                 |         |                                                                        |                         |                   | 216 - 237            | (R)QKTOEASDEAADQEEEEAYLRD(-) | 852.24        | 3               | 2553.70                   | 70.8         | 2.88E-004           |
|                                                 |         |                                                                        |                         |                   | 218 - 237            | (K)TQEASDEAADQEEEEAYLRD(-)   | 1149.80       | 2               | 2297.58                   | 112.0        | 1.62E-008           |
|                                                 |         |                                                                        |                         |                   | 216 - 237            | (R)QKTOEASDEAADQEEEEAYLRD(-) | 1277.92       | 2               | 2553.83                   | 95.9         | 5.74E-007           |

| Spot 68 [P1014-11 (75955 Rattus)] Diablo<br>LCMS/MS |           |       |       |     |                            |           |        |               |  |  |  |
|-----------------------------------------------------|-----------|-------|-------|-----|----------------------------|-----------|--------|---------------|--|--|--|
| Calculated                                          | Observed  | +/ppm | start | end | Sequence                   | Ion Score | C.I. % | Modification  |  |  |  |
| 1237.606                                            | 413.9484  |       | 1     | 10  | -MAALRSWMTR.S              | 8         |        | Oxidation (M) |  |  |  |
| 1460.6929                                           | 732.1409  |       | 61    | 73  | K.SEPOSLSNEALMR.R          | 52        |        |               |  |  |  |
| 1616.794                                            | 609.3199  |       | 61    | 74  | K.SEPOSLSNEALMRR.A         | 12        |        |               |  |  |  |
| 850.5025                                            | 426.1824  |       | 183   | 189 | R.NHIQLVK.S                | 40        |        |               |  |  |  |
| 844.4403                                            | 423.1024  |       | 190   | 196 | K.SQVQEV.R.Q               | 37        |        |               |  |  |  |
| 1857.9908                                           | 620.0589  |       | 190   | 205 | K.SQVQEVRLSQKAETK.L        | 11        |        |               |  |  |  |
| 1185.6353                                           | 593.6819  |       | 206   | 215 | K.LAEVQTQELR.Q             | 87        |        |               |  |  |  |
| 1185.6353                                           | 593.7024  |       | 206   | 215 | K.LAEVQTQELR.Q             | 89        |        |               |  |  |  |
| 1185.6353                                           | 593.7544  |       | 206   | 215 | K.LAEVQTQELR.Q             | 12        |        |               |  |  |  |
| 1185.6353                                           | 594.6604  |       | 206   | 215 | K.LAEVQTQELR.Q             | 56        |        |               |  |  |  |
| 2554.0943                                           | 852.1628  |       | 216   | 237 | R.QKTOEASDEAADQEEEEAYLRD.- | 47        |        |               |  |  |  |
| 2554.0943                                           | 852.2395  |       | 216   | 237 | R.QKTOEASDEAADQEEEEAYLRD.- | 71        |        |               |  |  |  |
| 2554.0943                                           | 1277.9209 |       | 216   | 237 | R.QKTOEASDEAADQEEEEAYLRD.- | 96        |        |               |  |  |  |
| 2297.9407                                           | 1149.7985 |       | 218   | 237 | K.TQEASDEAADQEEEEAYLRD.-   | 112       |        |               |  |  |  |
| 2297.9407                                           | 767.0619  |       | 218   | 237 | K.TQEASDEAADQEEEEAYLRD.-   | 41        |        |               |  |  |  |
| 2297.9407                                           | 1150.7819 |       | 218   | 237 | K.TQEASDEAADQEEEEAYLRD.-   | 63        |        |               |  |  |  |

**Spot 70 (P1014-14) – mixture of: Ras-related protein Rab-6A [Mus musculus] (Rab6a), Inosine triphosphatase, isoform CRA\_a (Itpa) and Ropporin-like protein (AKAP-associated sperm protein) [Mus musculus] (Ropn1)**

| Spot 70 (P1014-14) Rab6a, Itpa & Ropn1 |                    |                                                                                                          |                         |                   |                      |                       |               |                 |                           |              |                     |
|----------------------------------------|--------------------|----------------------------------------------------------------------------------------------------------|-------------------------|-------------------|----------------------|-----------------------|---------------|-----------------|---------------------------|--------------|---------------------|
| LCMS/MS (Scaffold)                     |                    |                                                                                                          |                         |                   |                      |                       |               |                 |                           |              |                     |
| Sample Name                            | Acc No.            | Protein(s) inferred                                                                                      | No. Peptides identified | Sequence Coverage | Position in sequence | Peptide Sequence      | Precursor m/z | Charge observed | Calculated mass (neutral) | Mascot score | Mascot Expect value |
| P1014-14                               | P35279             | sp P35279 Ras-related protein Rab-6A Tax_id=10090 [Mus musculus]                                         | 4                       | 18.30%            | 2 - 12               | (M)sAGGDFGNPLR(K)     | 566.58        | 2               | 1131.15                   | 71.9         | 2.88E-004           |
|                                        |                    |                                                                                                          |                         |                   | 2 - 13               | (M)sAGGDFGNPLR(K)     | 630.70        | 2               | 1259.38                   | 58.5         | 6.01E-003           |
|                                        |                    |                                                                                                          |                         |                   | 147 - 158            | (K)ELNVMIETSAK(A)     | 691.66        | 2               | 1381.31                   | 80.7         | 3.30E-005           |
|                                        |                    |                                                                                                          |                         |                   | 170 - 183            | (R)VAAALPGMESTQDR(S)  | 723.18        | 2               | 1444.35                   | 73.8         | 1.58E-004           |
|                                        |                    |                                                                                                          |                         |                   | 2 - 8                | (M)aASLVGK(K)         | 667.26        | 1               | 686.25                    | 51.5         | 2.13E-002           |
|                                        | ENSRNOP00000028838 | ens ENSRNOP00000028838 ENSRNOP00000021233 transcript:ENSRNOT00000028838 Tax_id=10116 [Rattus norvegicus] | 2                       | 10.60%            |                      |                       |               |                 |                           |              |                     |
|                                        | Q9EQ00             | sp Q9EQ00 Ropporin-1-like protein Tax_id=10090 [Mus musculus]                                            | 1                       | 4.78%             | 185 - 198            | (K)LQEIFYGVTDGAGDH(-) | 754.72        | 2               | 1507.42                   | 77.7         | 6.44E-005           |
|                                        |                    |                                                                                                          |                         |                   | 70 - 80              | (K)TDTGLTGGLLK(V)     | 573.70        | 2               | 1145.38                   | 44.9         | 1.48E-001           |

| Spot 70 [P1014-14 (75073 Rodent)] Rab6a |          |        |       |     |                    |           |        |                         |  |
|-----------------------------------------|----------|--------|-------|-----|--------------------|-----------|--------|-------------------------|--|
| LCMS/MS                                 |          |        |       |     |                    |           |        |                         |  |
| Calculated                              | Observed | +/-ppm | start | end | Sequence           | Ion Score | C.I. % | Modification            |  |
| 1236.5557                               | 413.1712 |        | 1     | 12  | -MSAGGDFGNPLR.K    | 11        |        | Oxidation (M)           |  |
| 1131.5309                               | 566.5807 |        | 2     | 12  | M.SAGGDFGNPLR.K    | 72        |        | Acetyl (Protein N-term) |  |
| 1259.6258                               | 630.6967 |        | 2     | 13  | M.SAGGDFGNPLR.K.F  | 59        |        | Acetyl (Protein N-term) |  |
| 1671.8693                               | 558.4215 |        | 61    | 74  | R.TVRLQLWDTAGGER.F | 11        |        |                         |  |
| 1315.6521                               | 659.6417 |        | 64    | 74  | R.LQLWDTAGQER.F    | 40        |        |                         |  |
| 1380.6959                               | 691.6606 |        | 147   | 158 | K.ELNVMIETSAK.A    | 81        |        |                         |  |
| 1444.696                                | 723.1622 |        | 170   | 183 | R.VAAALPGMESTQDR.S | 65        |        |                         |  |
| 1444.696                                | 723.1602 |        | 170   | 183 | R.VAAALPGMESTQDR.S | 74        |        |                         |  |
| 1105.5437                               | 553.6207 |        | 184   | 192 | R.SREDMIDIK.L      | 18        |        |                         |  |

| Spot 70 [P1014-14 (75073 Rodent)] Itpa |          |        |       |     |                       |           |        |                         |  |
|----------------------------------------|----------|--------|-------|-----|-----------------------|-----------|--------|-------------------------|--|
| LCMS/MS                                |          |        |       |     |                       |           |        |                         |  |
| Calculated                             | Observed | +/-ppm | start | end | Sequence              | Ion Score | C.I. % | Modification            |  |
| 1744.0247                              | 582.5378 |        | 2     | 18  | M.AASLVGKIKIVFTGNAK.K | 16        |        | Acetyl (Protein N-term) |  |
| 1075.639                               | 539.1472 |        | 9     | 18  | K.KIVFTGNAK.K         | 27        |        |                         |  |
| 1198.6492                              | 400.5215 |        | 134   | 144 | R.GKTPGGIVMPR.G       | 26        |        | Oxidation (M)           |  |
| 997.5379                               | 499.6796 |        | 136   | 144 | K.TPGQIVMPR.G         | 39        |        |                         |  |
| 1507.658                               | 754.7192 |        | 185   | 198 | K.LQEIFYGVTDGAGDH.-   | 78        |        |                         |  |

# Spot 72 (D23 20070719) – L-lactate dehydrogenase B chain (Ldhh)

SUB [4700 Reflector Spec #1 MC=>BC=>MC[BP = 842.5, 6427] , <<E16\_MS\_1>> 4700 Reflector Spec #1 MC=>BC=>MC[BP = 842.5, 70

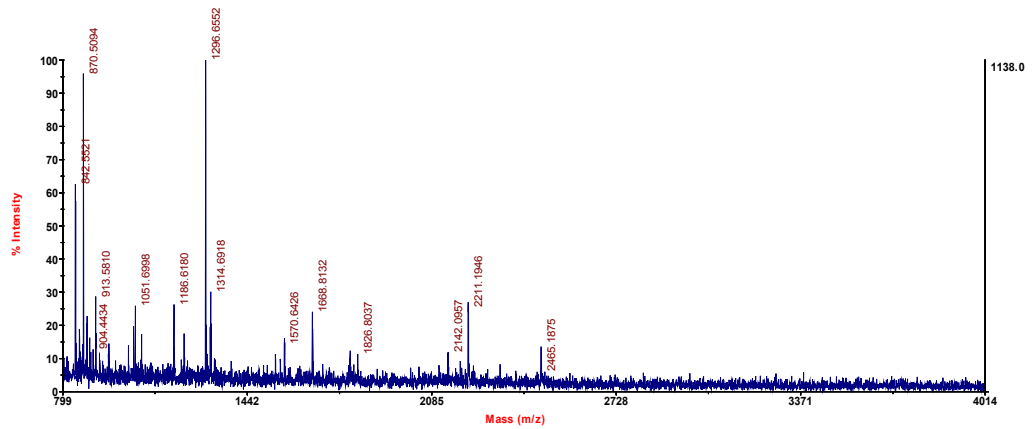

| Spot 72 (20070719-D23) Ldhh |           |        |       |     |                   |               |
|-----------------------------|-----------|--------|-------|-----|-------------------|---------------|
| PMF/MALDI                   |           |        |       |     |                   |               |
| Calculated                  | Observed  | +/-ppm | start | end | Sequence          |               |
| 912.5757                    | 913.581   | -2     | 92    | 100 | K.IVVVTAGVR.Q     |               |
| 1555.8066                   | 1556.8    | -9     | 101   | 113 | R.QQEGESRLNLVQR.N |               |
| 1072.5375                   | 1073.5481 | 3      | 171   | 178 | R.FRYLMAEK.L      |               |
| 1026.5532                   | 1027.5437 | -16    | 271   | 279 | R.IHPVSTMVK.G     | Oxidation (M) |
| 958.5447                    | 959.5363  | -16    | 300   | 308 | R.GLTSVINGK.L     | Oxidation (M) |
| 1185.6353                   | 1186.618  | -21    | 309   | 318 | K.LKDDEVAQLR.K    |               |
| 1313.7303                   | 1314.6918 | -35    | 309   | 319 | K.LKDDEVAQLR.K.S  |               |



# Spot 74 (D14 20070719) – Alpha-enolase (Eno1)

4700 Reflector Spec #1 MC>BC>MC[BP = 842.5, 14687]

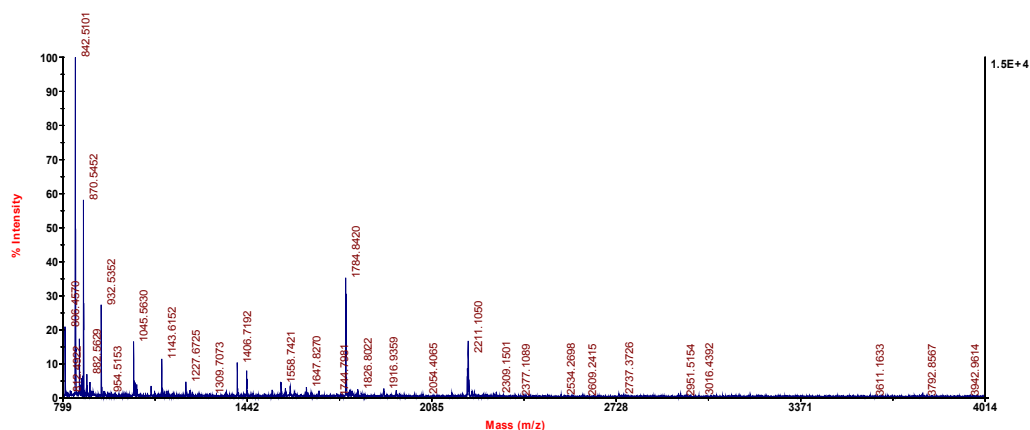

| Spot 74 (20070719.D14) Eno1 |           |        |       |     |                         |           |                    |
|-----------------------------|-----------|--------|-------|-----|-------------------------|-----------|--------------------|
| MS•MS/MS                    |           |        |       |     |                         |           |                    |
| Calculated                  | Observed  | +/-ppm | start | end | Sequence                | Ion Score | C.I.% Modification |
| 806.4518                    | 806.4557  | 5      | 406   | 411 | YNOILR                  |           |                    |
| 806.4518                    | 806.4557  | 5      | 406   | 411 | YNOILR                  |           |                    |
| 904.4622                    | 904.4578  | -5     | 412   | 419 | IEEELGSK                |           |                    |
| 932.5311                    | 932.533   | 2      | 426   | 433 | SFRNPLAK                |           |                    |
| 932.5311                    | 932.533   | 2      | 426   | 433 | SFRNPLAK                |           |                    |
| 1056.536                    | 1056.5317 | -4     | 253   | 261 | AGKYDLDFK               |           |                    |
| 1118.6681                   | 1118.6663 | -2     | 403   | 411 | LAKYNOILR               |           |                    |
| 1143.6156                   | 1143.6166 | 1      | 183   | 192 | IGAEVYHNLIK             | 9         | 87.218             |
| 1143.6156                   | 1143.6166 | 1      | 183   | 192 | IGAEVYHNLIK             |           |                    |
| 1406.7162                   | 1406.723  | 5      | 15    | 27  | GNPTVEVDLYTAK           | 34        | 99.959             |
| 1406.7162                   | 1406.723  | 5      | 15    | 27  | GNPTVEVDLYTAK           |           |                    |
| 1439.7417                   | 1439.7417 | 0      | 269   | 280 | YITPDQLADLYK            |           |                    |
| 1439.7417                   | 1439.7417 | 0      | 269   | 280 | YITPDQLADLYK            | 1         | 9.09               |
| 1528.6914                   | 1528.6963 | 3      | 256   | 268 | YDLDFKSPDDASR           |           |                    |
| 1646.8319                   | 1646.8208 | -7     | 179   | 192 | EAMRIGAEVYHNLIK         |           | Oxidation (M)      |
| 1652.7506                   | 1652.7976 | 28     | 89    | 102 | IDQLMIEMDGTENK          |           | Oxidation (M) [5]  |
| 1691.8962                   | 1691.9104 | 8      | 406   | 419 | YNOILRIEEELGSK          |           |                    |
| 1784.845                    | 1784.8458 | 0      | 253   | 268 | AGKYDLDFKSPDDASR        |           |                    |
| 1784.845                    | 1784.8458 | 0      | 253   | 268 | AGKYDLDFKSPDDASR        | 20        | 98.802             |
| 1804.9438                   | 1804.966  | 23     | 32    | 49  | AAVPSGASTGIYEALERL      |           |                    |
| 1960.9246                   | 1960.9298 | 3      | 202   | 220 | DATNVGDEGGFAPNILENK     |           |                    |
| 2154.0713                   | 2154.0672 | 7      | 9     | 27  | EIFDSRGNPTVEVDLYTAK     |           |                    |
| 2208.0278                   | 2208.0452 | 8      | 233   | 252 | AGYTDQVIGMDVAASEFYR     |           | Oxidation (M)      |
| 2208.0278                   | 2208.0452 | 8      | 233   | 252 | AGYTDQVIGMDVAASEFYR     |           | Oxidation (M)      |
| 2309.1042                   | 2309.1619 | 26     | 199   | 220 | YGKDATNVGDEGGFAPNILENK  |           |                    |
| 2736.343                    | 2736.3887 | 20     | 80    | 102 | KLNVVEQEIKDQLMIEMDGTENK |           | 2 Oxidation (M)    |

| Spot 74 (20070719.D14) Eno1 |           |        |       |     |                             |           |                    |
|-----------------------------|-----------|--------|-------|-----|-----------------------------|-----------|--------------------|
| PMF/MALDI                   |           |        |       |     |                             |           |                    |
| Calculated                  | Observed  | +/-ppm | start | end | Sequence                    | Ion Score | C.I.% Modification |
| 2153.0641                   | 2154.0771 | 3      | 10    | 26  | R EIFDSRGNPTVEVDLYTAK.G     |           |                    |
| 1405.7089                   | 1406.7192 | 2      | 16    | 26  | R GNPTVEVDLYTAK.G           |           |                    |
| 1803.9366                   | 1804.9744 | 17     | 33    | 50  | R.AAVPSGASTGIYEALERL.D      |           |                    |
| 1180.6564                   | 1181.6691 | 5      | 61    | 71  | K.GVSKAVEHINK.T             |           |                    |
| 909.4395                    | 910.4442  | -3     | 65    | 71  | K.AVEHINK.T                 |           |                    |
| 898.5486                    | 899.5757  | -22    | 72    | 80  | K.TIAPALYSK.K               |           |                    |
| 1026.6437                   | 1027.6345 | -16    | 72    | 81  | K.TIAPALYSK.K.L             |           |                    |
| 1651.7433                   | 1652.7947 | -27    | 90    | 103 | K.IDQLMIEMDGTENK.S          |           | Oxidation (M)      |
| 1645.8246                   | 1646.816  | -10    | 180   | 193 | R.EAMRIGAEVYHNLIK.N         |           | Oxidation (M)      |
| 1142.6084                   | 1143.6152 | 0      | 184   | 193 | R.IGAEVYHNLIK.N             |           |                    |
| 2308.0971                   | 2309.1601 | 20     | 200   | 221 | K.YGKDATNVGDEGGFAPNILENK.E  |           |                    |
| 1959.9174                   | 1960.9214 | -2     | 203   | 221 | K.DATNVGDEGGFAPNILENK.E     |           |                    |
| 2191.0256                   | 2192.0403 | 3      | 234   | 253 | K.AGYTDQVIGMDVAASEFYR.A     |           |                    |
| 2207.0205                   | 2208.0347 | 3      | 234   | 253 | K.AGYTDQVIGMDVAASEFYR.A     |           | Oxidation (M)      |
| 1055.5287                   | 1056.53   | -6     | 254   | 262 | R.AGKYDLDFK.S               |           |                    |
| 1527.6841                   | 1528.6925 | 1      | 257   | 269 | K.YDLDFKSPDDASR.Y           |           |                    |
| 1438.7344                   | 1439.7386 | -2     | 270   | 281 | R.YITPDQLADLYK.S            |           |                    |
| 2624.2495                   | 2625.2419 | -6     | 336   | 358 | K.SCNCLLLKYNQIGSVTESLOACK.L |           |                    |
| 1117.6607                   | 1118.6647 | -3     | 404   | 412 | R.LAKYNOILR.I               |           |                    |
| 805.4446                    | 806.4569  | 6      | 407   | 412 | K.YNOILR.I                  |           |                    |
| 1690.8889                   | 1691.9058 | 6      | 407   | 420 | K.YNOILRIEEELGSK.A          |           |                    |
| 903.4549                    | 904.4594  | -3     | 413   | 420 | R.IEEELGSK.A                |           |                    |
| 931.5239                    | 932.5352  | 4      | 427   | 434 | R.SFRNPLAK.-                |           |                    |

# Spot 83 (B8 20080606) - Nuclear autoantigenic sperm protein (Nasp)

SUB (4700 Reflector Spec #1 MC=>BC=>MC[BP = 842.5, 53859] , <<A1\_MS\_1>> 4700 Reflector Spec #1 MC=>BC=>MC[BP = 882.6, 21

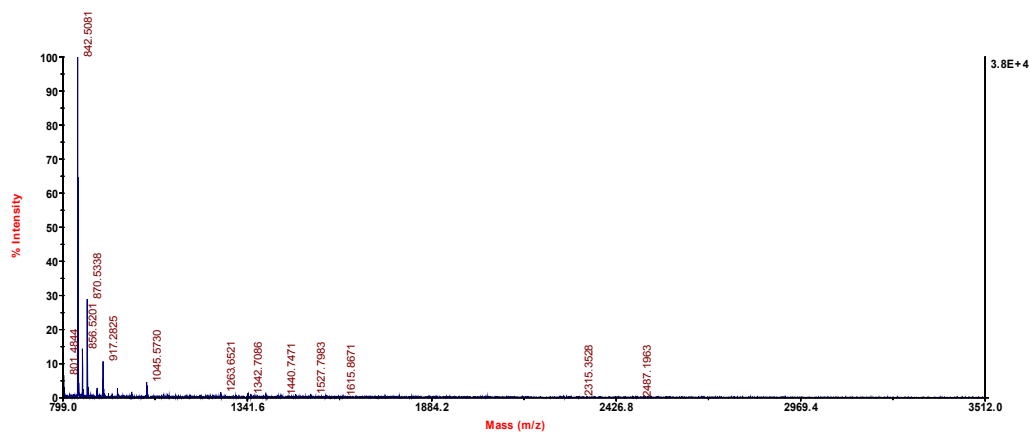

| Spot 83 (20080606-B8) Nasp |           |        |       |     |                                                     |               |
|----------------------------|-----------|--------|-------|-----|-----------------------------------------------------|---------------|
| MS•MS/MS                   |           |        |       |     |                                                     |               |
| Calculated                 | Observed  | +/-ppm | start | end | Sequence                                            | Ion Score     |
| 801.4828                   | 801.4844  | 2      | 94    | 100 | S L L E L A R                                       | 20            |
| 801.4828                   | 801.4844  | 2      | 94    | 100 | S L L E L A R                                       | 98.009        |
| 856.5614                   | 856.5255  | -42    | 45    | 52  | K L L G L G Q K                                     |               |
| 856.5614                   | 856.5255  | -42    | 45    | 52  | K L L G L G Q K                                     |               |
| 959.5519                   | 959.5547  | 3      | 598   | 605 | S I D V I E K R                                     | 17            |
| 959.5519                   | 959.5547  | 3      | 598   | 605 | S I D V I E K R                                     | 95.926        |
| 1001.5625                  | 1001.5657 | 3      | 650   | 659 | S G N V A E L A L K                                 |               |
| 1001.5625                  | 1001.5657 | 3      | 650   | 659 | S G N V A E L A L K                                 |               |
| 1094.584                   | 1094.5774 | -6     | 242   | 251 | S I S G V Y V G N K                                 |               |
| 1094.584                   | 1094.5774 | -6     | 242   | 251 | S I S G V Y V G N K                                 |               |
| 1342.7114                  | 1342.7064 | -4     | 524   | 535 | E A Q L Y A A G A H L K                             |               |
| 1342.7114                  | 1342.7064 | -4     | 524   | 535 | E A Q L Y A A G A H L K                             |               |
| 1351.641                   | 1351.688  | 35     | 34    | 45  | M E S L D V D S E A K K                             |               |
| 1351.641                   | 1351.688  | 35     | 34    | 45  | M E S L D V D S E A K K                             |               |
| 2487.2031                  | 2487.2202 | 7      | 660   | 685 | A T L V E S S T S G F T P S G A G A S V S M I A S R | Oxidation (M) |

| Spot 83 (20080606-B8) Nasp |           |        |       |     |                                                         |                 |
|----------------------------|-----------|--------|-------|-----|---------------------------------------------------------|-----------------|
| PMF/MALDI                  |           |        |       |     |                                                         |                 |
| Calculated                 | Observed  | +/-ppm | start | end | Sequence                                                | Ion Score       |
| 1350.6337                  | 1351.6888 | 35     | 34    | 45  | K M E S L D V D S E A K K L                             |                 |
| 855.5542                   | 856.5201  | -48    | 45    | 52  | K L L G L G Q K H                                       |                 |
| 800.4756                   | 801.4844  | 2      | 94    | 100 | K S L L E L A R M                                       |                 |
| 1262.6506                  | 1263.6521 | -5     | 435   | 445 | R A T E K A P E D K F K I                               |                 |
| 1341.7041                  | 1342.7086 | -2     | 524   | 535 | K E A Q L Y A A G A H L K L                             |                 |
| 958.5447                   | 959.5576  | 6      | 598   | 605 | K S I D V I E K R M                                     |                 |
| 1093.5511                  | 1094.5697 | 10     | 606   | 614 | R M A V L L E Q M K E                                   | 2 Oxidation (M) |
| 831.4338                   | 832.4793  | 46     | 639   | 645 | R E K I E D A K E                                       |                 |
| 1000.5553                  | 1001.5581 | -4     | 650   | 659 | R S G N V A E L A L K A                                 |                 |
| 2486.1959                  | 2487.1963 | -3     | 660   | 685 | K A T L V E S S T S G F T P S G A G A S V S M I A S R K | Oxidation (M)   |

## Spot 86 (P1014-01) – Actin, cytoplasmic 2 (Actg1)

| Spot 86 [P1014-01 (75058 Rodent)] Actg1 |          |        |       |     |                                 |           |        |                                        |
|-----------------------------------------|----------|--------|-------|-----|---------------------------------|-----------|--------|----------------------------------------|
| LCMS/MS                                 |          |        |       |     |                                 |           |        |                                        |
| Calculated                              | Observed | +/-ppm | start | end | Sequence                        | Ion Score | C.I. % | Modification                           |
| 2851.264                                | 951.1815 |        | 2     | 28  | M.EEEIAALVIDNGSGMCKAGFAGDDAPR.A | 60        |        | Acetyl (Protein N-term); Oxidation (M) |
| 975.441                                 | 488.1391 |        | 19    | 28  | K.AGFAGDDAPR.A                  | 48        |        |                                        |
| 1197.6982                               | 599.6592 |        | 29    | 39  | R.AVFPSIVGRPR.H                 | 25        |        |                                        |
| 1789.8846                               | 895.7362 |        | 239   | 254 | K.SYELPDGGVITIGNER.F            | 91        |        |                                        |
| 1789.8846                               | 896.2407 |        | 239   | 254 | K.SYELPDGGVITIGNER.F            | 44        |        |                                        |
| 1547.8051                               | 517.3168 |        | 313   | 326 | R.MQKEITALAPSTMK.I              | 26        |        |                                        |

## Spot 87 (E10 20070719) – Ferritin heavy chain (Fth1)

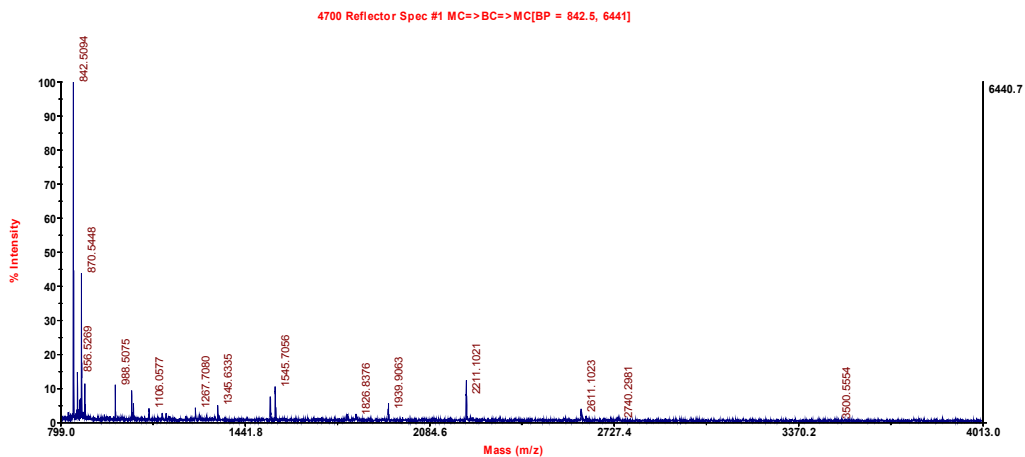

| Spot 87 (20070719-E10) Fth1 |           |        |       |     |                              |                 |
|-----------------------------|-----------|--------|-------|-----|------------------------------|-----------------|
| PMF/MALDI                   |           |        |       |     |                              |                 |
| Calculated                  | Observed  | +/-ppm | start | end | Sequence                     |                 |
| 1544.6967                   | 1545.7056 | 1      | 11    | 23  | R.QNYHODSEAAINR.Q            |                 |
| 1344.6211                   | 1345.6335 | 4      | 55    | 64  | K.YFLHQSHEER.E               |                 |
| 1938.8972                   | 1939.9062 | 1      | 55    | 69  | K.YFLHQSHEEREHAEK.L          |                 |
| 875.5116                    | 876.5132  | -6     | 81    | 87  | R.IFLQDIK.K                  |                 |
| 1266.6932                   | 1267.708  | 6      | 110   | 120 | K.SVNSLLELHK.L               |                 |
| 1260.6837                   | 1261.6801 | -9     | 148   | 158 | K.ELGDHYTNLRK.M              |                 |
| 2610.1003                   | 2611.1023 | -2     | 159   | 182 | K.MGAPESGMAEYLFDKHTLGHGDES.- | 2 Oxidation (M) |

## Spot 87 (D20 20080815) - Ferritin heavy chain (Fth1)

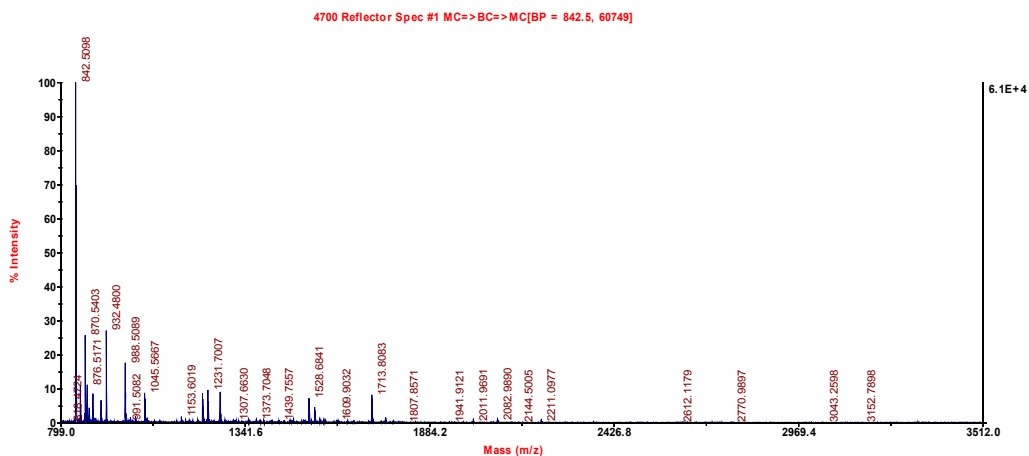

| Spot 87 (20080815-D20) Fth1 |           |        |       |     |                              |                 |
|-----------------------------|-----------|--------|-------|-----|------------------------------|-----------------|
| PMF/MALDI                   |           |        |       |     |                              |                 |
| Calculated                  | Observed  | +/-ppm | start | end | Sequence                     |                 |
| 1544.6967                   | 1545.7065 | 2      | 11    | 23  | R.QNYHODSEAAINR.Q            |                 |
| 1639.8464                   | 1640.809  | -27    | 65    | 77  | R.EHAEKLMKLNQR.G             | Oxidation (M)   |
| 927.4998                    | 928.5146  | 8      | 73    | 80  | K.LQNGRGR.I                  |                 |
| 1641.9315                   | 1642.8972 | -25    | 78    | 91  | R.GGRIFLQDIKKPDR.D           |                 |
| 875.5116                    | 876.5171  | -2     | 81    | 87  | R.IFLQDIK.K                  |                 |
| 1266.6932                   | 1267.7045 | 3      | 110   | 120 | K.SVNSLLELHK.L               |                 |
| 1480.7998                   | 1481.8113 | 3      | 145   | 157 | K.SIKELGDHYTNLR.K            |                 |
| 1608.8947                   | 1609.9032 | 1      | 145   | 158 | K.SIKELGDHYTNLRK.M           |                 |
| 1152.5887                   | 1153.6019 | 5      | 148   | 157 | K.ELGDHYTNLR.K               |                 |
| 1260.6837                   | 1261.6912 | 0      | 148   | 158 | K.ELGDHYTNLRK.M              |                 |
| 1676.7062                   | 1677.7246 | 7      | 159   | 173 | K.MGAPESGMAEYLFDK.H          | 2 Oxidation (M) |
| 2610.1003                   | 2611.0979 | -4     | 159   | 182 | K.MGAPESGMAEYLFDKHTLGHGDES.- | 2 Oxidation (M) |

# Spot 91 (E8 20070719) – Proteasome subunit beta type 4 precursor (Psmb4)

SUB (4700 Reflector Spec #1 MC=>BC=>MC[BP = 842.5, 9681] , <<E15\_MS\_1>> 4700 Reflector Spec #1 MC=>BC=>MC[BP = 842.5, 88

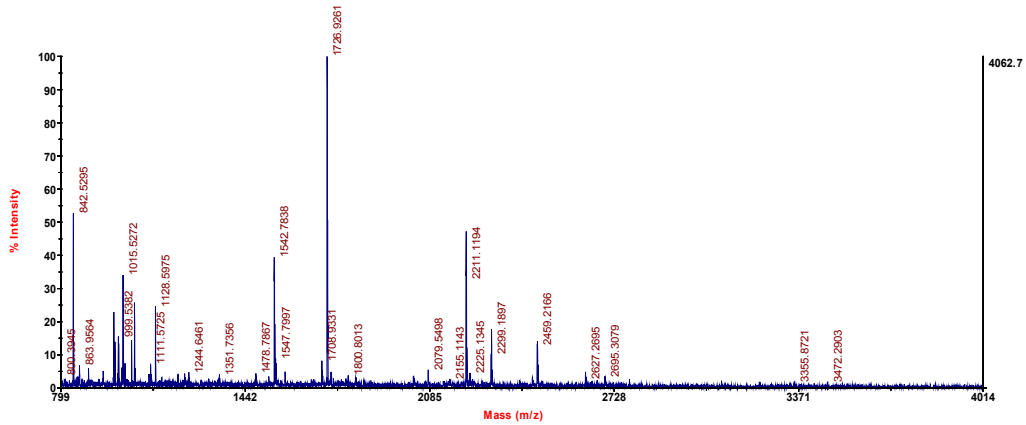

| Spot 91 (20070719-E8) Psmb4 |           |        |       |     |                         |           |                    |
|-----------------------------|-----------|--------|-------|-----|-------------------------|-----------|--------------------|
| MS•MS/MS                    |           |        |       |     |                         |           |                    |
| Calculated                  | Observed  | +/-ppm | start | end | Sequence                | Ion Score | C.I.% Modification |
| 983.5421                    | 983.5433  | 1      | 131   | 138 | AIHSWLTR                |           |                    |
| 983.5421                    | 983.5433  | 1      | 131   | 138 | AIHSWLTR                |           |                    |
| 1022.5516                   | 1022.5544 | 3      | 231   | 239 | FQVATVTEK               |           |                    |
| 1055.5632                   | 1055.5597 | -3     | 219   | 226 | VLYYRDAR                |           |                    |
| 1055.5632                   | 1055.5597 | -3     | 219   | 226 | VLYYRDAR                |           |                    |
| 1128.6008                   | 1128.594  | -6     | 201   | 210 | QPVLSQTEAR              |           |                    |
| 1128.6008                   | 1128.594  | -6     | 201   | 210 | QPVLSQTEAR              |           |                    |
| 1542.791                    | 1542.7778 | -9     | 227   | 239 | SYNRFQVATVTEK           |           |                    |
| 1542.791                    | 1542.7778 | -9     | 227   | 239 | SYNRFQVATVTEK           |           |                    |
| 1547.8097                   | 1547.797  | -8     | 45    | 59  | TQNPMTGTSLGVK           |           | Oxidation (M)      |
| 1726.9333                   | 1726.9211 | -7     | 196   | 210 | EVLEKQPVLSQTEAR         |           |                    |
| 1726.9333                   | 1726.9211 | -7     | 196   | 210 | EVLEKQPVLSQTEAR         | 23        | 99.414             |
| 2627.2117                   | 2627.2341 | 9      | 86    | 108 | IMRVNDSTMLGASGDYADFQYLK |           | 2 Oxidation (M)    |

| Spot 91 (20070719-E8) Psmb4 |           |        |       |     |                             |           |                    |
|-----------------------------|-----------|--------|-------|-----|-----------------------------|-----------|--------------------|
| PMF/MALDI                   |           |        |       |     |                             |           |                    |
| Calculated                  | Observed  | +/-ppm | start | end | Sequence                    | Ion Score | C.I.% Modification |
| 1546.8025                   | 1547.7997 | -7     | 46    | 60  | R.TQNPMTGTSLGVK.F           |           | Oxidation (M)      |
| 2626.2043                   | 2627.2695 | 22     | 87    | 109 | R.IMRVNDSTMLGASGDYADFQYLK.Q |           | 2 Oxidation (M)    |
| 2458.1798                   | 2459.2166 | 12     | 110   | 131 | K.QVLGQMVDELLGDGHSYSPRA     |           | Oxidation (M)      |
| 982.5348                    | 983.5345  | -8     | 132   | 139 | R.AIHSWLTR.A                |           |                    |
| 1725.9261                   | 1726.9261 | -4     | 197   | 211 | R.EVLEKQPVLSQTEAR.E         |           |                    |
| 1127.5935                   | 1128.5975 | -3     | 202   | 211 | K.QPVLSQTEAR.E              |           |                    |
| 1054.556                    | 1055.5599 | -3     | 220   | 227 | R.VLYYRDAR.S                |           |                    |
| 1541.7838                   | 1542.7838 | -5     | 228   | 240 | R.SYNRFQVATVTEK.G           |           |                    |
| 1021.5444                   | 1022.554  | 2      | 232   | 240 | R.FQVATVTEK.G               |           |                    |

**Spot 93 (D9 20080606) - mixture of: Tubulin, alpha 1C (Tuba1c), Tubulin alpha-1A chain (Tuba1a), Tubulin alpha-3 chain (Tuba3), Tubulin beta-2C chain (Tubb2c), Tubulin beta-3 chain (Tubb3) and Tubulin beta-2A chain (Tubb2a)**

SUB (4700 Reflector Spec #1 MC=>BC=>MC[BP = 1701.9, 12739] , <<C1\_MS\_1>> 4700 Reflector Spec #1 MC=>BC=>MC[BP = 882.6, 6

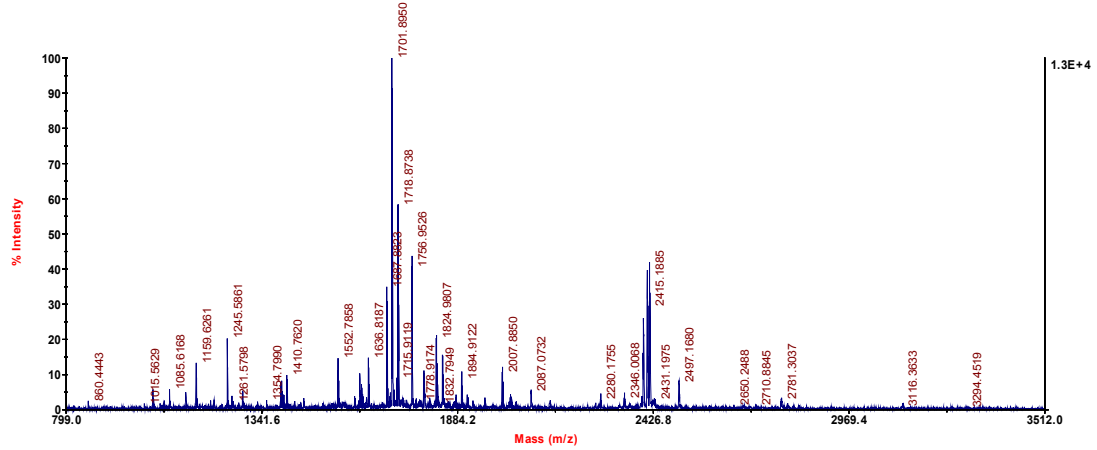

| Spot 93 (20080606-D9) Tuba1c |           |        |       |     |                                  |           |       |               |  |
|------------------------------|-----------|--------|-------|-----|----------------------------------|-----------|-------|---------------|--|
| PMF/MALDI                    |           |        |       |     |                                  |           |       |               |  |
| Calculated                   | Observed  | +/-ppm | start | end | Sequence                         | Ion Score | C.I.% | Modification  |  |
| 2006.8858                    | 2007.895  | -4     | 41    | 60  | K.TIGGGDDSFNTFFSETGAGK.H         |           |       |               |  |
| 2496.167                     | 2497.168  | -3     | 41    | 64  | K.TIGGGDDSFNTFFSETGAGKHVPR.A     |           |       |               |  |
| 1700.8985                    | 1701.895  | -6     | 65    | 79  | R.AVFVDLEPTVIDEVR.T              |           |       |               |  |
| 2279.1798                    | 2280.1755 | -5     | 65    | 84  | R.AVFVDLEPTVIDEVRTGTYR.Q         |           |       |               |  |
| 1409.7667                    | 1410.762  | -9     | 85    | 96  | R.QLFHPEQLITGK.E                 |           |       |               |  |
| 2414.1978                    | 2415.1895 | -7     | 85    | 105 | R.QLFHPEQLITGKEDAANNYAR.G        |           |       |               |  |
| 1841.0047                    | 1841.9949 | -9     | 106   | 121 | R.GHYTIGKEIDLVLDR.I              |           |       |               |  |
| 1084.6128                    | 1085.6168 | -3     | 113   | 121 | K.EIDLVLDR.I                     |           |       |               |  |
| 1353.798                     | 1354.799  | -5     | 113   | 123 | K.EIDLVLDRIR.K                   |           |       |               |  |
| 1873.9758                    | 1874.9489 | -18    | 215   | 229 | R.RNLDIERPTYNLNR.L               |           |       |               |  |
| 1717.8747                    | 1718.8738 | -5     | 216   | 229 | R.NLDIERPTYNLNR.L                |           |       |               |  |
| 2408.2012                    | 2409.199  | -4     | 244   | 264 | R.FDGNLVDLTFQTNLVPYPR.I          |           |       |               |  |
| 1755.9559                    | 1756.9526 | -6     | 265   | 280 | R.IHFPATYAPVISAEK.A              |           |       |               |  |
| 2760.2785                    | 2761.3037 | 6      | 281   | 304 | K.AYHEQLTVAEITNACFEPANQMVK.C     |           |       | Oxidation (M) |  |
| 3293.4791                    | 3294.4519 | -10    | 281   | 308 | K.AYHEQLTVAEITNACFEPANQMVKCDPR.H |           |       |               |  |
| 1609.9039                    | 1610.8794 | -20    | 321   | 336 | R.GDVVPKDVNAAIATIK.T             |           |       |               |  |
| 1014.5709                    | 1015.5629 | -15    | 327   | 336 | K.DVNAAIATIK.T                   |           |       |               |  |
| 1754.845                     | 1755.8573 | 3      | 339   | 352 | K.RTIQFVWVCPGTFK.V               |           |       |               |  |
| 1851.9843                    | 1852.9762 | -8     | 353   | 370 | K.VGINYQPPTVPPGDLAR.V            |           |       |               |  |
| 1395.6857                    | 1396.6849 | -6     | 391   | 401 | R.LDHKFDLMYAKR                   |           |       | Oxidation (M) |  |
| 1058.5219                    | 1059.5314 | 2      | 395   | 402 | K.FDLMYAKR.A                     |           |       | Oxidation (M) |  |
| 2501.107                     | 2502.1455 | 12     | 402   | 422 | K.RAFVHWYVYVGEEMEEGFSEAR.E       |           |       | Oxidation (M) |  |
| 2329.011                     | 2330.0056 | -5     | 403   | 422 | R.AFVHWYVYVGEEMEEGFSEAR.E        |           |       |               |  |
| 2345.0059                    | 2346.0068 | -3     | 403   | 422 | R.AFVHWYVYVGEEMEEGFSEAR.E        |           |       | Oxidation (M) |  |

| Spot 93 (20080606-D9) Tuba1a |           |        |       |     |                              |           |       |               |  |
|------------------------------|-----------|--------|-------|-----|------------------------------|-----------|-------|---------------|--|
| PMF/MALDI                    |           |        |       |     |                              |           |       |               |  |
| Calculated                   | Observed  | +/-ppm | start | end | Sequence                     | Ion Score | C.I.% | Modification  |  |
| 2006.8858                    | 2007.895  | -4     | 41    | 60  | K.TIGGGDDSFNTFFSETGAGK.H     |           |       |               |  |
| 2496.167                     | 2497.168  | -3     | 41    | 64  | K.TIGGGDDSFNTFFSETGAGKHVPR.A |           |       |               |  |
| 1700.8985                    | 1701.895  | -6     | 65    | 79  | R.AVFVDLEPTVIDEVR.T          |           |       |               |  |
| 2279.1798                    | 2280.1755 | -5     | 65    | 84  | R.AVFVDLEPTVIDEVRTGTYR.Q     |           |       |               |  |
| 1409.7667                    | 1410.762  | -9     | 85    | 96  | R.QLFHPEQLITGK.E             |           |       |               |  |
| 2414.1978                    | 2415.1895 | -7     | 85    | 105 | R.QLFHPEQLITGKEDAANNYAR.G    |           |       |               |  |
| 1841.0047                    | 1841.9949 | -9     | 106   | 121 | R.GHYTIGKEIDLVLDR.I          |           |       |               |  |
| 1084.6128                    | 1085.6168 | -3     | 113   | 121 | K.EIDLVLDR.I                 |           |       |               |  |
| 1353.798                     | 1354.799  | -5     | 113   | 123 | K.EIDLVLDRIR.K               |           |       |               |  |
| 1873.9758                    | 1874.9489 | -18    | 215   | 229 | R.RNLDIERPTYNLNR.L           |           |       |               |  |
| 1717.8747                    | 1718.8738 | -5     | 216   | 229 | R.NLDIERPTYNLNR.L            |           |       |               |  |
| 1456.8613                    | 1457.8611 | -5     | 230   | 243 | R.LIGIVSSITASLR.F            |           |       |               |  |
| 2408.2012                    | 2409.199  | -4     | 244   | 264 | R.FDGNLVDLTFQTNLVPYPR.I      |           |       |               |  |
| 1755.9559                    | 1756.9526 | -6     | 265   | 280 | R.IHFPATYAPVISAEK.A          |           |       |               |  |
| 1609.9039                    | 1610.8794 | -20    | 321   | 336 | R.GDVVPKDVNAAIATIK.T         |           |       |               |  |
| 1014.5709                    | 1015.5629 | -15    | 327   | 336 | K.DVNAAIATIK.T               |           |       |               |  |
| 1754.845                     | 1755.8573 | 3      | 339   | 352 | K.RTIQFVWVCPGTFK.V           |           |       |               |  |
| 1823.9782                    | 1824.9807 | -3     | 353   | 370 | K.VGINYQPPTVPPGDLAK.V        |           |       |               |  |
| 1395.6857                    | 1396.6849 | -6     | 391   | 401 | R.LDHKFDLMYAKR               |           |       | Oxidation (M) |  |
| 1058.5219                    | 1059.5314 | 2      | 395   | 402 | K.FDLMYAKR.A                 |           |       | Oxidation (M) |  |
| 2501.107                     | 2502.1455 | 12     | 402   | 422 | K.RAFVHWYVYVGEEMEEGFSEAR.E   |           |       | Oxidation (M) |  |
| 2329.011                     | 2330.0056 | -5     | 403   | 422 | R.AFVHWYVYVGEEMEEGFSEAR.E    |           |       |               |  |
| 2345.0059                    | 2346.0068 | -3     | 403   | 422 | R.AFVHWYVYVGEEMEEGFSEAR.E    |           |       | Oxidation (M) |  |

| Spot 93 (20080606-D9) Tuba3 |           |        |       |     |                              |           |                    |
|-----------------------------|-----------|--------|-------|-----|------------------------------|-----------|--------------------|
| PMF/MALDI                   |           |        |       |     |                              |           |                    |
| Calculated                  | Observed  | +/-ppm | start | end | Sequence                     | Ion Score | C.I.% Modification |
| 2006.8858                   | 2007.885  | -4     | 41    | 60  | K.TIGGGDDSFNTFFSETGAGK.H     |           |                    |
| 2496.167                    | 2497.168  | -3     | 41    | 64  | K.TIGGGDDSFNTFFSETGAGKHVPR.A |           |                    |
| 1686.8829                   | 1687.8823 | -5     | 65    | 79  | R.AVFVDLEPTVYDEV.R.T         |           |                    |
| 1409.7667                   | 1410.762  | -9     | 85    | 96  | R.QLFHPEQLITGK.E             |           |                    |
| 2414.1978                   | 2415.1885 | -7     | 85    | 105 | R.QLFHPEQLITGKEDAANNYR.G     |           |                    |
| 1826.989                    | 1827.9832 | -7     | 106   | 121 | R.GHYTGKEIDLVLDR.I           |           |                    |
| 1070.5972                   | 1071.5952 | -9     | 113   | 121 | K.EVDLVLDR.I                 |           |                    |
| 1873.9758                   | 1874.9489 | -18    | 215   | 229 | R.RNLDIERPTYNLNR.L           |           |                    |
| 1717.8747                   | 1718.8738 | -5     | 216   | 229 | R.NLDIERPTYNLNR.L            |           |                    |
| 1456.8613                   | 1457.8611 | -5     | 230   | 243 | R.LIGIVSSITASLR.F            |           |                    |
| 2408.2012                   | 2409.199  | -4     | 244   | 264 | R.FDGLNVDLTFQTNLVPYPR.I      |           |                    |
| 1755.9559                   | 1756.9526 | -6     | 265   | 280 | R.IHFPLATYAPVISAEK.A         |           |                    |
| 1609.9039                   | 1610.8794 | -20    | 321   | 336 | R.GDVVPKDVNAAIATIK.T         |           |                    |
| 1014.5709                   | 1015.5629 | -15    | 327   | 336 | K.DVNAAIATIK.T               |           |                    |
| 1754.945                    | 1755.9573 | 3      | 339   | 352 | K.RTQFVDFWCPTGFK.V           |           |                    |
| 1823.9782                   | 1824.9807 | -3     | 353   | 370 | K.VGINYQPTVYPPGGDLAK.V       |           |                    |
| 1395.6857                   | 1396.6849 | -6     | 391   | 401 | R.LDHKFDLMYAK.R              |           | Oxidation (M)      |
| 1058.5219                   | 1059.5314 | 2      | 395   | 402 | K.FDLMYAKR.A                 |           | Oxidation (M)      |
| 2501.107                    | 2502.1455 | 12     | 402   | 422 | K.RAFVHWYYGEGMEEGEFSEAR.E    |           | Oxidation (M)      |
| 2329.011                    | 2330.0056 | -5     | 403   | 422 | R.AFVHWYYGEGMEEGEFSEAR.E     |           |                    |
| 2345.0059                   | 2346.0068 | -3     | 403   | 422 | R.AFVHWYYGEGMEEGEFSEAR.E     |           | Oxidation (M)      |

| Spot 93 (20080606-D9) Tubb2c |           |        |       |     |                               |           |                    |
|------------------------------|-----------|--------|-------|-----|-------------------------------|-----------|--------------------|
| PMF/MALDI                    |           |        |       |     |                               |           |                    |
| Calculated                   | Observed  | +/-ppm | start | end | Sequence                      | Ion Score | C.I.% Modification |
| 3115.4159                    | 3116.3633 | -19    | 20    | 46  | K.FWEVISDEHIDPTGYHGDSDLQLER.I |           |                    |
| 1327.6408                    | 1328.6257 | -17    | 47    | 58  | R.INVYINEATGGK.Y              |           |                    |
| 1616.808                     | 1617.7889 | -16    | 63    | 77  | R.AVLVDLEPGTMDSVR.S           |           | Oxidation (M)      |
| 2797.3361                    | 2798.3181 | -9     | 78    | 103 | R.SGPFQGFPRDNFVFGSGAGNNWAK.G  |           |                    |
| 1957.9745                    | 1958.9595 | -12    | 104   | 121 | K.GHYTEGAELVDSVLDVVR.K        |           |                    |
| 2086.0695                    | 2087.0732 | -2     | 104   | 122 | K.GHYTEGAELVDSVLDVVRK.E       |           |                    |
| 1076.525                     | 1077.5459 | 13     | 155   | 162 | K.IREEYPDR.I                  |           |                    |
| 1129.588                     | 1130.5935 | -2     | 242   | 251 | R.FPGQLNADLR.K                |           |                    |
| 1257.683                     | 1258.6805 | -8     | 242   | 252 | R.FPGQLNADLR.L                |           |                    |
| 1286.7169                    | 1287.7161 | -6     | 252   | 262 | R.KLAVNMVPPFR.L               |           | Oxidation (M)      |
| 1158.6219                    | 1159.6261 | -3     | 253   | 262 | K.LAVNMVPPFR.L                |           | Oxidation (M)      |
| 1619.8283                    | 1620.8158 | -12    | 263   | 276 | R.LHFFMPGFAPLTSR.G            |           |                    |
| 1635.8232                    | 1636.8187 | -7     | 263   | 276 | R.LHFFMPGFAPLTSR.G            |           | Oxidation (M)      |
| 1706.8549                    | 1707.8583 | -2     | 283   | 297 | R.ALTVPQLTQMFDK.N             |           | Oxidation (M)      |
| 1038.5962                    | 1039.5879 | -5     | 310   | 318 | R.YLTVAVFR.G                  |           |                    |
| 1695.8257                    | 1696.8379 | 3      | 337   | 350 | K.NSSYFVEWIPNNVK.T            |           |                    |
| 1856.9342                    | 1857.9418 | 0      | 363   | 379 | K.MSATFIGNSTAIGELFK.R         |           |                    |
| 1872.9291                    | 1873.9199 | -9     | 363   | 379 | K.MSATFIGNSTAIGELFK.R         |           | Oxidation (M)      |
| 2029.0302                    | 2030.0256 | -6     | 363   | 380 | K.MSATFIGNSTAIGELFKR.I        |           | Oxidation (M)      |
| 1244.586                     | 1245.5861 | -6     | 381   | 390 | R.ISEQFTAMFR.R                |           | Oxidation (M)      |
| 1400.6871                    | 1401.6891 | -4     | 381   | 391 | R.ISEQFTAMFR.R.K              |           | Oxidation (M)      |

| Spot 93 (20080606-D9) Tubb3 |           |        |       |     |                              |           |                    |
|-----------------------------|-----------|--------|-------|-----|------------------------------|-----------|--------------------|
| PMF/MALDI                   |           |        |       |     |                              |           |                    |
| Calculated                  | Observed  | +/-ppm | start | end | Sequence                     | Ion Score | C.I.% Modification |
| 1911.9479                   | 1912.9189 | -19    | 47    | 62  | R.ISVYINEASSHKYVPR.A         |           |                    |
| 1630.8236                   | 1631.8127 | -11    | 63    | 77  | R.AILVDLEPGTMDSVR.S          |           | Oxidation (M)      |
| 2794.3364                   | 2795.3408 | -1     | 78    | 103 | R.SGAFGLFRPDNFVFGSGAGNNWAK.G |           |                    |
| 1957.9745                   | 1958.9595 | -12    | 104   | 121 | K.GHYTEGAELVDSVLDVVR.K       |           |                    |
| 2086.0695                   | 2087.0732 | -2     | 104   | 122 | K.GHYTEGAELVDSVLDVVRK.E      |           |                    |
| 1129.588                    | 1130.5935 | -2     | 242   | 251 | R.FPGQLNADLR.K               |           |                    |
| 1257.683                    | 1258.6805 | -8     | 242   | 252 | R.FPGQLNADLR.L               |           |                    |
| 1286.7169                   | 1287.7161 | -6     | 252   | 262 | R.KLAVNMVPPFR.L              |           | Oxidation (M)      |
| 1158.6219                   | 1159.6261 | -3     | 253   | 262 | K.LAVNMVPPFR.L               |           | Oxidation (M)      |
| 1619.8283                   | 1620.8158 | -12    | 263   | 276 | R.LHFFMPGFAPLTSR.G           |           | Oxidation (M)      |
| 1706.8549                   | 1707.8583 | -2     | 283   | 297 | R.ALTVPQLTQMFDK.N            |           | Oxidation (M)      |
| 1068.5968                   | 1069.5999 | -4     | 310   | 318 | R.YLTVATVFR.G                |           |                    |
| 1882.8838                   | 1883.9065 | 8      | 321   | 336 | R.MSMKEVDEQMLAIQSK.N         |           | Oxidation (M)      |
| 1695.8257                   | 1696.8379 | 3      | 337   | 350 | K.NSSYFVEWIPNNVK.V           |           |                    |
| 1872.9291                   | 1873.9199 | -9     | 363   | 379 | K.MSATFIGNSTAIGELFK.R        |           |                    |
| 2029.0302                   | 2030.0256 | -6     | 363   | 380 | K.MSATFIGNSTAIGELFKR.I       |           |                    |
| 2045.0252                   | 2046.0283 | -2     | 363   | 380 | K.MSATFIGNSTAIGELFKR.I       |           | Oxidation (M)      |
| 1244.586                    | 1245.5861 | -6     | 381   | 390 | R.ISEQFTAMFR.R               |           | Oxidation (M)      |
| 1400.6871                   | 1401.6891 | -4     | 381   | 391 | R.ISEQFTAMFR.R.K             |           | Oxidation (M)      |

| Spot 93 (20080606-D9) Tubb2a |           |        |       |     |                              |           |                    |
|------------------------------|-----------|--------|-------|-----|------------------------------|-----------|--------------------|
| PMF/MALDI                    |           |        |       |     |                              |           |                    |
| Calculated                   | Observed  | +/-ppm | start | end | Sequence                     | Ion Score | C.I.% Modification |
| 1630.8236                    | 1631.8127 | -11    | 63    | 77  | R.AILVDLEPGTMDSVR.S          |           | Oxidation (M)      |
| 2797.3361                    | 2798.3181 | -9     | 78    | 103 | R.SGPFQGFPRDNFVFGSGAGNNWAK.G |           |                    |
| 1957.9745                    | 1958.9595 | -12    | 104   | 121 | K.GHYTEGAELVDSVLDVVR.K       |           |                    |
| 2086.0695                    | 2087.0732 | -2     | 104   | 122 | K.GHYTEGAELVDSVLDVVRK.E      |           |                    |
| 1076.525                     | 1077.5459 | 13     | 155   | 162 | K.IREEYPDR.I                 |           |                    |
| 1129.588                     | 1130.5935 | -2     | 242   | 251 | R.FPGQLNADLR.K               |           |                    |
| 1257.683                     | 1258.6805 | -8     | 242   | 252 | R.FPGQLNADLR.L               |           |                    |
| 1286.7169                    | 1287.7161 | -6     | 252   | 262 | R.KLAVNMVPPFR.L              |           | Oxidation (M)      |
| 1158.6219                    | 1159.6261 | -3     | 253   | 262 | K.LAVNMVPPFR.L               |           | Oxidation (M)      |
| 1619.8283                    | 1620.8158 | -12    | 263   | 276 | R.LHFFMPGFAPLTSR.G           |           |                    |
| 1635.8232                    | 1636.8187 | -7     | 263   | 276 | R.LHFFMPGFAPLTSR.G           |           | Oxidation (M)      |
| 1706.8549                    | 1707.8583 | -2     | 283   | 297 | R.ALTVPQLTQMFDK.N            |           |                    |
| 1722.8498                    | 1723.875  | 10     | 283   | 297 | R.ALTVPQLTQMFDK.N            |           | Oxidation (M)      |
| 1695.8257                    | 1696.8379 | 3      | 337   | 350 | K.NSSYFVEWIPNNVK.T           |           |                    |
| 1856.9342                    | 1857.9418 | 0      | 363   | 379 | K.MSATFIGNSTAIGELFK.R        |           |                    |
| 1872.9291                    | 1873.9199 | -9     | 363   | 379 | K.MSATFIGNSTAIGELFK.R        |           | Oxidation (M)      |
| 2029.0302                    | 2030.0256 | -6     | 363   | 380 | K.MSATFIGNSTAIGELFKR.I       |           | Oxidation (M)      |
| 1244.586                     | 1245.5861 | -6     | 381   | 390 | R.ISEQFTAMFR.R               |           | Oxidation (M)      |
| 1400.6871                    | 1401.6891 | -4     | 381   | 391 | R.ISEQFTAMFR.R.K             |           | Oxidation (M)      |

## Spot 95 (P1014-12) – Acrosin-binding protein (Acrbp)

| Spot 95 (P1014-12) Acrbp |         |                                                                       |                         |                   |                      |                    |               |                 |                           |              |                     |
|--------------------------|---------|-----------------------------------------------------------------------|-------------------------|-------------------|----------------------|--------------------|---------------|-----------------|---------------------------|--------------|---------------------|
| LCMS/MS (Scaffold)       |         |                                                                       |                         |                   |                      |                    |               |                 |                           |              |                     |
| Sample Name              | Acc No. | Protein(s) inferred                                                   | No. Peptides identified | Sequence Coverage | Position in sequence | Peptide Sequence   | Precursor m/z | Charge observed | Calculated mass (neutral) | Mascot score | Mascot Expect value |
| P1014-12                 | G6AY33  | sp G6AY33 Acrosin-binding protein<br>Tax_id=10116 [Rattus norvegicus] | 1                       | 3.80%             | 259 - 270            | (K)SLSSNPSFFTPR(V) | 670.24        | 2               | 1338.47                   | 43.1         | 1.90E-001           |



# Spot 96 (D4 20070719) – Stress-70 protein, mitochondrial precursor (Hspa9)

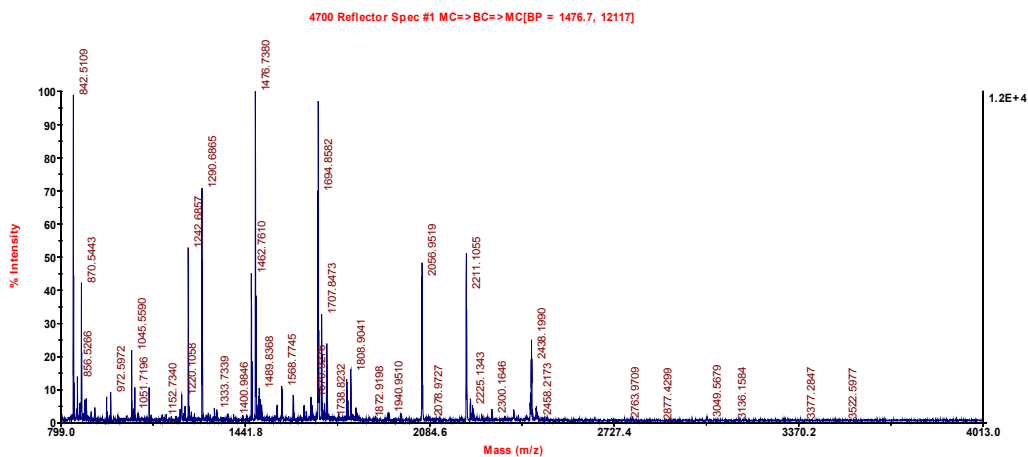

| Spot 96 (20070719.D4) Hspa9 |           |        |       |     |                       |               |
|-----------------------------|-----------|--------|-------|-----|-----------------------|---------------|
| MS•MS/MS                    |           |        |       |     |                       |               |
| Calculated                  | Observed  | +/-ppm | start | end | Sequence              | Ion Score     |
| 887.5131                    | 887.5158  | 3      | 100   | 107 | LVGMPAKR              |               |
| 917.4437                    | 917.4446  | 1      | 647   | 653 | LFEMAYK               | Oxidation (M) |
| 958.4952                    | 958.5029  | 8      | 77    | 85  | VLENAGAR              | Oxidation (M) |
| 972.5988                    | 972.5967  | -2     | 139   | 146 | NVPFKIVR              |               |
| 1045.5387                   | 1045.5582 | 19     | 647   | 654 | LFEMAYKK              | Oxidation (M) |
| 1056.6312                   | 1056.6384 | 7      | 265   | 292 | HVKFKFR               |               |
| 1231.6641                   | 1231.671  | 6      | 635   | 646 | QAASSLQQASLK          |               |
| 1242.6801                   | 1242.6831 | 2      | 207   | 218 | DAGQISGLNVLR          |               |
| 1242.6801                   | 1242.6831 | 2      | 207   | 218 | DAGQISGLNVLR          | 17            |
| 1290.6801                   | 1290.6836 | 3      | 395   | 405 | VQQTVDLDFGR           | 28            |
| 1290.6801                   | 1290.6836 | 3      | 395   | 405 | VQQTVDLDFGR           |               |
| 1380.6501                   | 1380.6456 | -3     | 564   | 574 | NAEKYAEEDRR           |               |
| 1462.757                    | 1462.7568 | 0      | 378   | 391 | SDIGEVLVGGMTR         |               |
| 1462.757                    | 1462.7568 | 0      | 378   | 391 | SDIGEVLVGGMTR         | 19            |
| 1476.7329                   | 1476.7334 | 0      | 86    | 99  | TTPSVVAFTPDGER        | 35            |
| 1476.7329                   | 1476.7334 | 0      | 86    | 99  | TTPSVVAFTPDGER        |               |
| 1489.8373                   | 1489.8339 | -2     | 349   | 361 | AQFEGIVDLIKR          |               |
| 1493.723                    | 1493.7272 | 3      | 127   | 138 | RYDDPEVQKDK           |               |
| 1568.7704                   | 1568.7692 | -1     | 108   | 121 | QAVTNPNTFYATK         |               |
| 1569.8345                   | 1569.7725 | -39    | 160   | 173 | LYSPSIGAFVLMK         |               |
| 1608.7687                   | 1608.769  | 0      | 174   | 187 | MKETAENYLGHTAK        | Oxidation (M) |
| 1645.8795                   | 1645.8723 | -4     | 219   | 234 | VINEPTAAALAYGLDK      | Oxidation (M) |
| 1670.9183                   | 1670.9193 | 1      | 203   | 218 | QATK-DAGQISGLNVLR     |               |
| 1694.8496                   | 1694.8511 | 1      | 188   | 202 | NAVITVPAYFNSQR        |               |
| 1694.8496                   | 1694.8511 | 1      | 188   | 202 | NAVITVPAYFNSQR        | 50            |
| 1706.8378                   | 1706.8391 | 1      | 293   | 307 | ETGVDLTKDNMALQR       | 12            |
| 1706.8378                   | 1706.8391 | 1      | 293   | 307 | ETGVDLTKDNMALQR       | 91.491        |
| 1709.8717                   | 1709.8374 | -20    | 144   | 159 | IVRASNGDAWVEAHGK      |               |
| 1724.8715                   | 1724.871  | 0      | 108   | 122 | QAVTNPNTFYATKR        | 18            |
| 1724.8715                   | 1724.871  | 0      | 108   | 122 | QAVTNPNTFYATKR        |               |
| 1808.9025                   | 1808.8973 | -3     | 469   | 485 | SQVFSTAADGGTGVEIK     | 37            |
| 1808.9025                   | 1808.8973 | -3     | 469   | 485 | SQVFSTAADGGTGVEIK     | 99.973        |
| 2055.9617                   | 2055.9548 | -3     | 266   | 284 | STNGDTFLGGEDFDQALLR   |               |
| 2233.1055                   | 2233.0835 | -10    | 626   | 646 | DSETGENIRQAASSLQQASLK |               |
| 2434.2129                   | 2434.2131 | 0      | 542   | 563 | EQQIMQSSGLSKDDIENMVK  | Oxidation (M) |

| Spot 96 (20070719-04) Hspa9 |           |        |       |     |                             |  |           |       |               |  |  |
|-----------------------------|-----------|--------|-------|-----|-----------------------------|--|-----------|-------|---------------|--|--|
| PMF/MALDI                   |           |        |       |     |                             |  |           |       |               |  |  |
| Calculated                  | Observed  | +/-ppm | start | end | Sequence                    |  | Ion Score | C.I.% | Modification  |  |  |
| 2078.0024                   | 2078.9724 | -18    | 53    | 73  | K.GAVVGIDLGTNSCVAVMEGK.Q    |  |           |       |               |  |  |
| 2421.188                    | 2422.1863 | -4     | 53    | 76  | K.GAVVGIDLGTNSCVAVMEGKQAK.V |  |           |       | Oxidation (M) |  |  |
| 957.4879                    | 958.5032  | 8      | 77    | 85  | K.VLENAEGAR.T               |  |           |       |               |  |  |
| 1475.7256                   | 1476.7379 | 3      | 86    | 99  | R.TTPSVVAFTPDGER.L          |  |           |       |               |  |  |
| 2188.1198                   | 2189.1072 | -9     | 86    | 106 | R.TTPSVVAFTPDGERLVGMPAK.R   |  |           |       | Oxidation (M) |  |  |
| 886.5058                    | 887.5168  | 4      | 100   | 107 | R.LVGMPAKR.Q                |  |           |       | Oxidation (M) |  |  |
| 1567.7631                   | 1568.7745 | 3      | 108   | 121 | R.QAVTNPNTFYATK.R           |  |           |       |               |  |  |
| 1723.8642                   | 1724.879  | 4      | 108   | 122 | R.QAVTNPNTFYATK.R.L         |  |           |       |               |  |  |
| 971.5916                    | 972.5971  | -2     | 139   | 146 | K.NVPFKIVR.A                |  |           |       |               |  |  |
| 1708.8645                   | 1709.8452 | -16    | 144   | 159 | K.IVRASNGDAWVEAHGK.L        |  |           |       |               |  |  |
| 1340.6109                   | 1341.6771 | 44     | 147   | 159 | R.ASNGDAWVEAHGK.L           |  |           |       |               |  |  |
| 1568.8272                   | 1569.7787 | -36    | 160   | 173 | K.LYSPSQIGAFVLMK.M          |  |           |       | Oxidation (M) |  |  |
| 1811.9678                   | 1812.8894 | -47    | 160   | 175 | K.LYSPSQIGAFVLMK.M.E        |  |           |       |               |  |  |
| 1607.7613                   | 1608.7739 | 3      | 174   | 187 | K.MKETAENYLGHAK.N           |  |           |       | Oxidation (M) |  |  |
| 1693.8424                   | 1694.858  | 5      | 188   | 202 | K.NAVITVPAYFNDISQR.Q        |  |           |       |               |  |  |
| 1669.9111                   | 1670.9275 | 5      | 203   | 218 | R.QATKDAQGISGLNVL.R.V       |  |           |       |               |  |  |
| 1241.6728                   | 1242.6857 | 5      | 207   | 218 | K.DAGQISGLNVL.R.V           |  |           |       |               |  |  |
| 1644.8723                   | 1645.8791 | 0      | 219   | 234 | R.VINEPTAAALAYGLDK.S        |  |           |       |               |  |  |
| 2104.0688                   | 2105.0999 | 11     | 219   | 238 | R.VINEPTAAALAYGLDKSEDK.V    |  |           |       |               |  |  |
| 2054.9545                   | 2055.9653 | 2      | 266   | 284 | K.STNGDTFLGGEDFDQALLR.H     |  |           |       |               |  |  |
| 899.5229                    | 900.5278  | -3     | 285   | 291 | R.HVKEFK.R                  |  |           |       |               |  |  |
| 1689.8366                   | 1690.8364 | -4     | 293   | 307 | R.ETGVDLTKDNMALQR.V         |  |           |       |               |  |  |
| 1705.8305                   | 1706.8453 | 4      | 293   | 307 | R.ETGVDLTKDNMALQR.V         |  |           |       | Oxidation (M) |  |  |
| 862.3967                    | 863.4466  | 49     | 301   | 307 | K.DNMLQR.V                  |  |           |       | Oxidation (M) |  |  |
| 1027.5597                   | 1028.569  | 2      | 341   | 348 | K.HLNMKLR.A                 |  |           |       | Oxidation (M) |  |  |
| 1332.7289                   | 1333.7339 | -2     | 349   | 360 | R.AQFEGIVTDLIK.R            |  |           |       |               |  |  |
| 1488.83                     | 1489.8367 | 0      | 349   | 361 | R.AQFEGIVTDLIK.R.T          |  |           |       |               |  |  |
| 1445.7548                   | 1446.7496 | -9     | 378   | 391 | K.SDIGEVILVGGMTR.M          |  |           |       |               |  |  |
| 1461.7497                   | 1462.7609 | 3      | 378   | 391 | K.SDIGEVILVGGMTR.M          |  |           |       | Oxidation (M) |  |  |
| 1269.6728                   | 1290.6865 | 5      | 395   | 405 | K.VQGTVDLFGRA.A             |  |           |       |               |  |  |
| 1672.8897                   | 1673.9004 | 2      | 395   | 409 | K.VQGTVDLFGRAPSK.A          |  |           |       |               |  |  |
| 1807.8952                   | 1808.9041 | 1      | 469   | 485 | K.SQVFSTAADGQVEIK.V         |  |           |       |               |  |  |
| 2433.2057                   | 2434.2251 | 5      | 542   | 563 | R.EGQVIGSSGSLKDDIENMVK.N    |  |           |       | Oxidation (M) |  |  |
| 1871.8935                   | 1872.9198 | 10     | 579   | 595 | R.VEAVNMAEGIIHDTETK.M       |  |           |       | Oxidation (M) |  |  |
| 903.496                     | 904.5001  | -3     | 618   | 624 | K.MRELLAR.K                 |  |           |       | Oxidation (M) |  |  |
| 2232.0982                   | 2233.0935 | -5     | 626   | 646 | K.DSETGENIRQAASSLQQASLK.L   |  |           |       |               |  |  |
| 1230.6568                   | 1231.6729 | 7      | 635   | 646 | R.QAASSLQQASLK.L            |  |           |       |               |  |  |
| 916.4364                    | 917.4445  | 1      | 647   | 653 | K.LFEMAYK.K                 |  |           |       | Oxidation (M) |  |  |
| 1044.5314                   | 1045.559  | 19     | 647   | 654 | K.LFEMAYKK.M                |  |           |       | Oxidation (M) |  |  |

### Spot 103 (A23 20080606) - Inner membrane protein, mitochondrial, isoform CRA\_a (Immt)

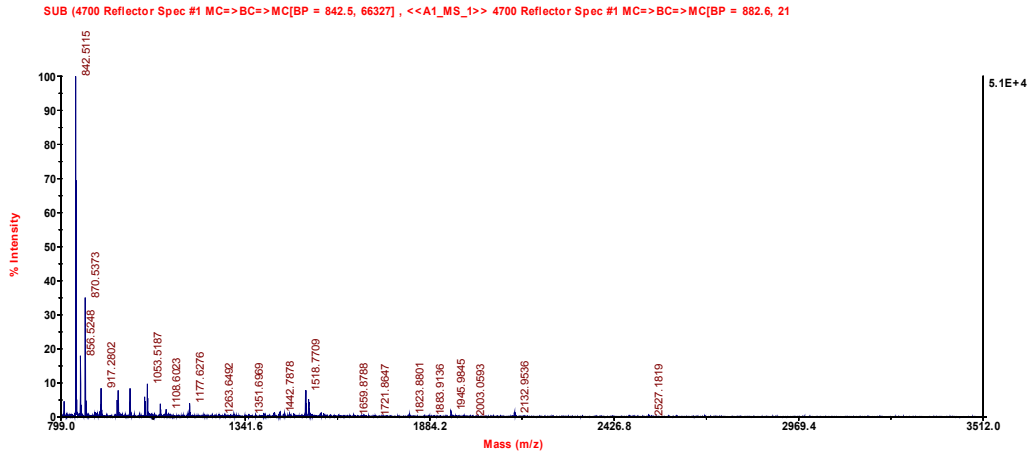

Spot 103 (20080606-A23) Immt (isoform CRA\_a)

| PMF/MALDI | Calculated | Observed  | +/-ppm | start | end | Sequence                | Ion Score | C.I.% | Modification  |
|-----------|------------|-----------|--------|-------|-----|-------------------------|-----------|-------|---------------|
|           | 1394.6929  | 1395.7115 | 8      | 73    | 84  | R.ESVEKTIPYSDK.L        |           |       |               |
|           | 966.6862   | 967.5923  | -1     | 102   | 110 | K.KPIQSGPLK.I           |           |       |               |
|           | 1306.6075  | 1307.6732 | 45     | 196   | 206 | K.QEQVEMESLAK.S         |           |       | Oxidation (M) |
|           | 1517.7695  | 1518.7709 | -3     | 207   | 220 | K.SLEDALNQTATVTR.Q      |           |       |               |
|           | 1441.7889  | 1442.7878 | -6     | 221   | 234 | R.QTITAQNAAVQAVK.A      |           |       |               |
|           | 1001.5505  | 1002.5576 | 0      | 260   | 268 | R.TVEGALKER.R           |           |       |               |
|           | 1114.587   | 1115.587  | -6     | 271   | 281 | K.AVDEAADALLK.A         |           |       |               |
|           | 905.4528   | 906.4358  | -27    | 284   | 290 | K.EELEKMK.T             |           |       |               |
|           | 1562.7828  | 1563.7844 | -4     | 300   | 314 | R.EIAGATPYITAAEEK.L     |           |       |               |
|           | 1454.7803  | 1455.7823 | -4     | 315   | 327 | K.LHSMIVLDSVVK.K        |           |       |               |
|           | 1470.7752  | 1471.776  | -4     | 315   | 327 | K.LHSMIVLDSVVK.K        |           |       | Oxidation (M) |
|           | 1058.572   | 1059.5907 | 11     | 328   | 337 | K.KVQAAGSEAK.V          |           |       |               |
|           | 1526.8205  | 1527.8156 | -8     | 338   | 350 | K.VVSGYHELTVQAR.D       |           |       |               |
|           | 1570.7879  | 1571.8253 | 19     | 356   | 369 | K.ELDSITPDITPGWK.G      |           |       |               |
|           | 913.5093   | 914.5098  | -7     | 390   | 396 | R.RIDQLNR.E             |           |       |               |
|           | 1536.826   | 1537.8278 | -4     | 403   | 415 | K.ATEKQHIELALER.Q       |           |       |               |
|           | 1107.6036  | 1108.6023 | -6     | 407   | 415 | K.QHIELALER.Q           |           |       |               |
|           | 963.5138   | 964.5188  | -2     | 422   | 430 | K.RAFDSAVAK.A           |           |       |               |
|           | 807.4127   | 808.4213  | 2      | 423   | 430 | R.AFDSAVAK.A            |           |       |               |
|           | 2131.948   | 2132.9536 | -1     | 507   | 524 | R.SOEGQMDNFTLDINTAYAR.L |           |       | Oxidation (M) |
|           | 1822.8909  | 1823.8901 | -4     | 527   | 543 | R.QEQAQVQSHAVAEFEAR.K   |           |       |               |
|           | 1944.9826  | 1945.9845 | -1     | 561   | 579 | K.TSSAEMPTPLSSAVEAIR.V  |           |       | Oxidation (M) |
|           | 1052.5138  | 1053.5187 | -2     | 603   | 611 | R.GVYSEETLR.A           |           |       |               |
|           | 2002.0411  | 2003.0593 | 5      | 652   | 668 | K.QLKPPAELYPEDINTFKL    |           |       |               |
|           | 1176.6251  | 1177.6276 | -4     | 688   | 697 | K.FVNQLKGESR.R          |           |       |               |

### Spot 103 (D2 20070719) – Inner membrane protein, mitochondrial, isoform CRA\_a (Immt)

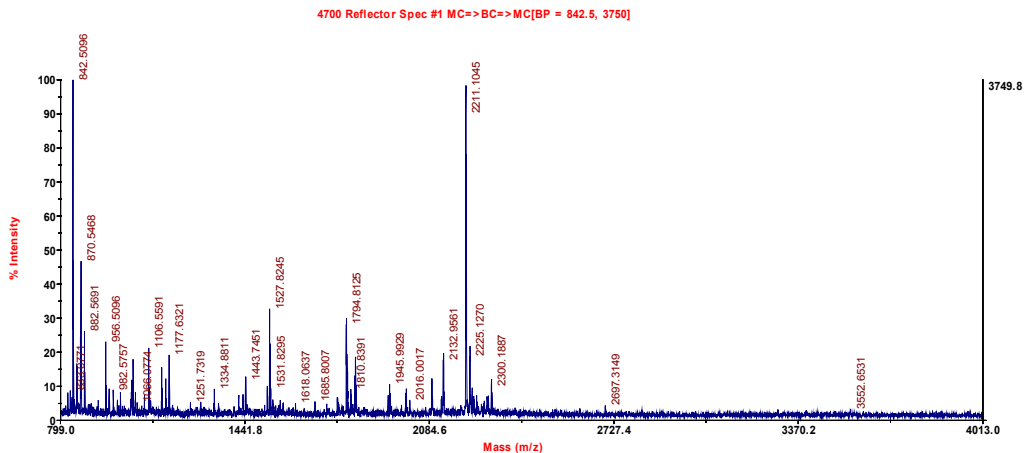

## Spot 103 (20070719-D2) Immt (isoform CRA\_a)

| PMF/MALDI  |           |        |       |     |                         |           |       |               |
|------------|-----------|--------|-------|-----|-------------------------|-----------|-------|---------------|
| Calculated | Observed  | +/-ppm | start | end | Sequence                | Ion Score | C.I.% | Modification  |
| 846.3773   | 847.3831  | -2     | 67    | 72  | K.WDSHFR.E              |           |       |               |
| 1418.6579  | 1419.6589 | -4     | 67    | 77  | K.WDSHFRESVEK.T         |           |       |               |
| 1517.7685  | 1518.7789 | 2      | 207   | 220 | K.SLEDALNGTATVTR.Q      |           |       |               |
| 1441.7889  | 1442.7845 | -8     | 221   | 234 | R.QTTAQNAAVQAVK.A       |           |       |               |
| 1562.7828  | 1563.792  | 1      | 300   | 314 | R.EIAGATPYITAAEEK.L     |           |       |               |
| 1526.8205  | 1527.8245 | -2     | 338   | 350 | K.VVSGYHELIVQAR.D       |           |       |               |
| 1536.826   | 1537.8195 | -9     | 403   | 415 | K.ATEKQHIELALER.Q       |           |       |               |
| 1107.6036  | 1108.6051 | -5     | 407   | 415 | K.QHIELALER.Q           |           |       |               |
| 1573.8325  | 1574.8322 | -5     | 465   | 478 | R.QAAAHTDHLRDVLK.V      |           |       |               |
| 2125.0215  | 2126.03   | 1      | 479   | 495 | K.VQEGELKFEFEGDLSEK.L   |           |       |               |
| 1266.6255  | 1267.6522 | 15     | 496   | 505 | K.LSEGELFHR.R           |           |       |               |
| 1442.7266  | 1443.7451 | 8      | 496   | 506 | K.LSEGELFHRR.S          |           |       |               |
| 2272.0542  | 2273.0337 | -12    | 506   | 524 | R.RSQEQMDNFTLDINTAYAR.L |           |       |               |
| 2131.948   | 2132.9561 | 0      | 507   | 524 | R.SQEQMDNFTLDINTAYAR.L  |           |       | Oxidation (M) |
| 2092.0661  | 2093.075  | 1      | 525   | 543 | R.LRGEGAVQSHAVAEFEAR.K  |           |       |               |
| 1822.8809  | 1823.8853 | -2     | 527   | 543 | R.GEGAVQSHAVAEFEAR.K    |           |       |               |
| 1944.9826  | 1945.9929 | 2      | 561   | 579 | K.TSSAEMPTIPLSSAVEAIR.V |           |       | Oxidation (M) |
| 1052.6138  | 1053.6045 | -16    | 603   | 611 | R.GVYSEETLR.A           |           |       |               |
| 981.5396   | 982.5757  | 29     | 612   | 619 | R.ARFYAVQK.L            |           |       |               |
| 2002.0411  | 2003.0355 | -6     | 652   | 668 | K.QLKPPAELYPEDINTFKL    |           |       |               |
| 1176.6251  | 1177.6321 | 0      | 688   | 697 | K.FVNQLKGESR.R          |           |       |               |

# Spot 104 (A18 20080606) - Ferritin heavy chain (Fth1)

SUB (4700 Reflector Spec #1 MC=>BC=>MC[BP = 842.5, 64371] , <<A1\_MS\_1>> 4700 Reflector Spec #1 MC=>BC=>MC[BP = 882.6, 21

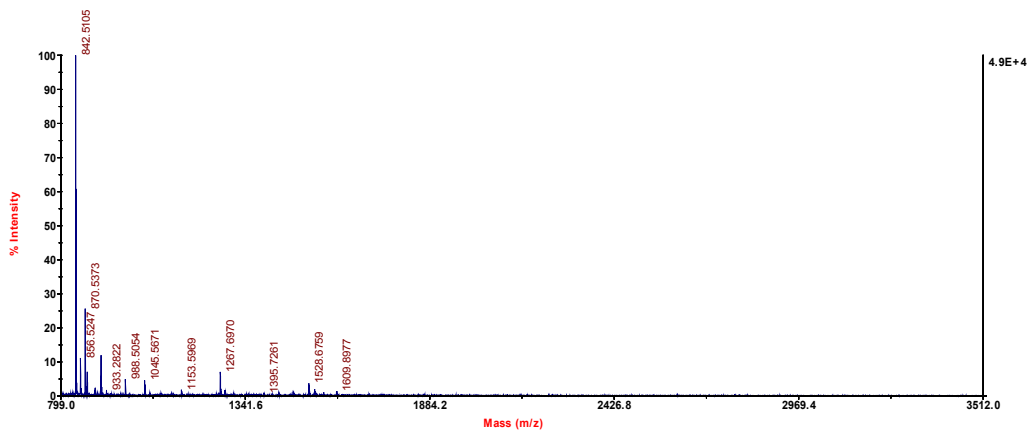

| Spot 104 (20080606-A18) Fth1 |           |        |       |     |               |           |
|------------------------------|-----------|--------|-------|-----|---------------|-----------|
| MS•MS/MS                     |           |        |       |     |               |           |
| Calculated                   | Observed  | +/-ppm | start | end | Sequence      | Ion Score |
| 876.5189                     | 876.5205  | 2      | 81    | 87  | IFLQDIK       |           |
| 876.5189                     | 876.5205  | 2      | 81    | 87  | IFLQDIK       | 7         |
| 1153.5959                    | 1153.5964 | 0      | 148   | 157 | ELGDHVTNLR    |           |
| 1153.5959                    | 1153.5964 | 0      | 148   | 157 | ELGDHVTNLR    |           |
| 1267.7004                    | 1267.6987 | -1     | 110   | 120 | SVNQSLLELHK   | 50        |
| 1267.7004                    | 1267.6987 | -1     | 110   | 120 | SVNQSLLELHK   | 99.999    |
| 1281.6909                    | 1281.689  | -1     | 148   | 158 | ELGDHVTNLRK   |           |
| 1345.6284                    | 1345.6732 | 33     | 55    | 64  | YFLHQSHEER    |           |
| 1481.807                     | 1481.8069 | 0      | 145   | 157 | SIKELGDHVTNLR |           |
| 1545.7041                    | 1545.6989 | -3     | 11    | 23  | QNYHQDSEAAINR | 46        |
| 1545.7041                    | 1545.6989 | -3     | 11    | 23  | QNYHQDSEAAINR | 99.997    |

| Spot 104 (20080606-A18) Fth1 |           |        |       |     |                    |           |
|------------------------------|-----------|--------|-------|-----|--------------------|-----------|
| PMF/MALDI                    |           |        |       |     |                    |           |
| Calculated                   | Observed  | +/-ppm | start | end | Sequence           | Ion Score |
| 945.488                      | 946.4875  | -8     | 2     | 10  | M.TTASPSQVR.Q      |           |
| 1544.6967                    | 1545.702  | -1     | 11    | 23  | R.QNYHQDSEAAINR.Q  |           |
| 1344.6211                    | 1345.6412 | 10     | 55    | 64  | K.YFLHQSHEER.E     |           |
| 875.5116                     | 876.52    | 1      | 81    | 87  | R.IFLQDIK.K        |           |
| 1266.6932                    | 1267.697  | -3     | 110   | 120 | K.SVNQSLLELHK.L    |           |
| 1480.7998                    | 1481.808  | 1      | 145   | 157 | K.SIKELGDHVTNLR.K  |           |
| 1608.8947                    | 1609.8977 | -3     | 145   | 158 | K.SIKELGDHVTNLRK.M |           |
| 1152.6887                    | 1153.5969 | 1      | 148   | 157 | K.ELGDHVTNLR.K     |           |
| 1280.6837                    | 1281.6816 | -7     | 148   | 158 | K.ELGDHVTNLRK.M    |           |

# Spot 106 (C2 20080606) - Isopentenyl-diphosphate Delta-isomerase 1 (Idi1)

SUB (4700 Reflector Spec #1 MC=>BC=>MC[BP = 842.5, 6955] , <<C1\_MS\_1>> 4700 Reflector Spec #1 MC=>BC=>MC[BP = 882.6, 673

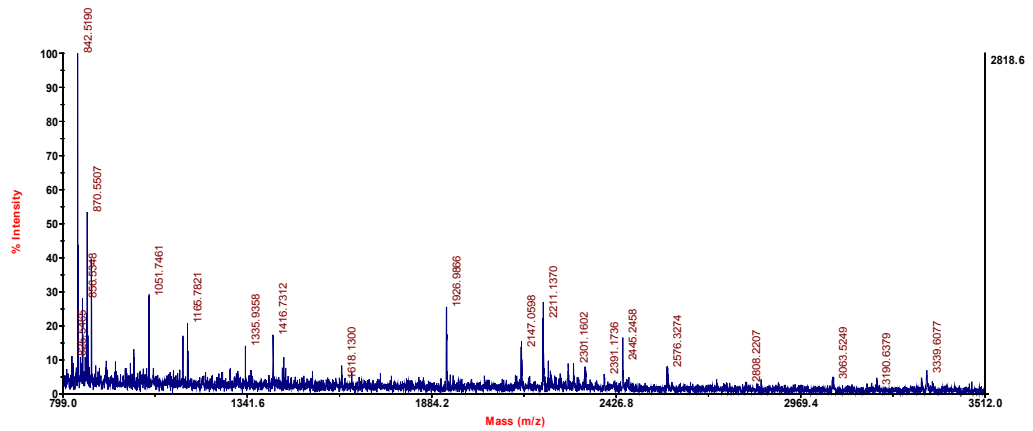

| Spot 106 (20080606-C2) Idi1 |           |        |       |     |                          |                    |
|-----------------------------|-----------|--------|-------|-----|--------------------------|--------------------|
| PMF/MALDI                   |           |        |       |     |                          |                    |
| Calculated                  | Observed  | +/-ppm | start | end | Sequence                 |                    |
| 2146.0286                   | 2147.0598 | 11     | 13    | 30  | K QVLLAEMCILIDENDNK.I    | Ion Score          |
| 1415.7085                   | 1416.7312 | 11     | 53    | 64  | R AFSVFLFNTENK.L         | C.I.% Modification |
| 2334.1413                   | 2335.1655 | 7      | 114   | 133 | K AELGIPLEEVDLNEMNYLTR.I | Oxidation (M)      |
| 2261.1117                   | 2262.1028 | -7     | 138   | 156 | K AQSDGIWGEHEIDYILFLR.K  |                    |

## Spot 108 (P1014-18) – mixture of: Protein arginine N-methyltransferase 5 [Mus musculus] (Prmt5), Heat shock-related 70 kDa protein 2 (Hspa2) and Serum albumin (Alb)

| Spot 108 (P1014-18) Prmt5, Hspa2 & Alb |         |                                                                                |                         |                   |                      |                          |               |                 |                           |              |                     |
|----------------------------------------|---------|--------------------------------------------------------------------------------|-------------------------|-------------------|----------------------|--------------------------|---------------|-----------------|---------------------------|--------------|---------------------|
| LCMS/MS (Scaffold)                     |         |                                                                                |                         |                   |                      |                          |               |                 |                           |              |                     |
| Sample Name                            | Acc No. | Protein(s) inferred                                                            | No. Peptides identified | Sequence Coverage | Position in sequence | Peptide Sequence         | Precursor m/z | Charge observed | Calculated mass (neutral) | Mascot score | Mascot Expect value |
| P1014-18                               | Q8CIG8  | sp Q8CIG8 Protein arginine N-methyltransferase 5 Tax_Id=10090 [Mus musculus]   | 3                       | 3.61%             | 2 - 13               | (M)aAmAVGGAGGSR(V)       | 531.62        | 2               | 1061.22                   | 90.3         | 4.35E-006           |
|                                        |         |                                                                                |                         |                   | 632 - 637            | (R)SYTIGL(-)             | 653.14        | 1               | 652.13                    | 40.5         | 1.66E-001           |
|                                        |         |                                                                                |                         |                   | 2 - 18               | (M)aAmAVGGAGGSRVSSGR(D)  | 766.74        | 2               | 1531.46                   | 48.1         | 5.74E-002           |
|                                        |         |                                                                                |                         |                   | 613 - 633            | (K)LYGGPGGGSSGGPTIEVD(-) | 967.14        | 2               | 1932.27                   | 93.8         | 1.29E-006           |
|                                        | P14659  | sp P14659 Heat shock-related 70 kDa protein 2 Tax_Id=10116 [Rattus norvegicus] | 1                       | 3.32%             |                      |                          |               |                 |                           |              |                     |
|                                        |         | ens ENSRNOP0000003921 ENSRNOP0000003911 [Rattus norvegicus]                    | 3                       | 4.61%             | 550 - 558            | (K)QTALAELVK(H)          | 486.68        | 2               | 971.34                    | 62.0         | 2.94E-003           |
|                                        |         | transcript:ENSRNOT0000003921 Tax_Id=10116 [Rattus norvegicus]                  |                         |                   | 549 - 558            | (K)KQTALAELVK(H)         | 550.72        | 2               | 1099.43                   | 52.6         | 2.45E-002           |
|                                        |         |                                                                                |                         |                   | 435 - 452            | (R)YTQKAPQVSTPTLVEAAR(N) | 653.86        | 3               | 1958.56                   | 55.1         | 1.23E-02            |

| Spot 108 [P1014-18 (75972 Rattus)] Hspa2 |          |         |       |     |                        |           |        |              |  |  |
|------------------------------------------|----------|---------|-------|-----|------------------------|-----------|--------|--------------|--|--|
| LCMS/MS                                  |          |         |       |     |                        |           |        |              |  |  |
| Calculated                               | Observed | +/- ppm | start | end | Sequence               | Ion Score | C.I. % | Modification |  |  |
| 1932.9152                                | 966.9369 |         | 79    | 94  | K.FEDATVQSDMKHWPFRR.V  | 6         |        |              |  |  |
| 1786.9826                                | 597.0064 |         | 173   | 189 | R.IINEPTAAAIAYGLDKK.G  | 10        |        |              |  |  |
| 1345.6812                                | 449.4429 |         | 240   | 250 | R.MVSHLAEFPKR.K        | 30        |        |              |  |  |
| 1152.5597                                | 577.3184 |         | 521   | 529 | R.MVQEAERYK.S          | 11        |        |              |  |  |
| 1932.8701                                | 967.1394 |         | 613   | 633 | K.LYGGPGGGSSGGPTIEVD.- | 81        |        |              |  |  |
| 1932.8701                                | 967.1399 |         | 613   | 633 | K.LYGGPGGGSSGGPTIEVD.- | 94        |        |              |  |  |

| Spot 108 [P1014-18 (75972 Rattus)] Alb |          |         |       |     |                        |           |        |               |  |  |
|----------------------------------------|----------|---------|-------|-----|------------------------|-----------|--------|---------------|--|--|
| LCMS/MS                                |          |         |       |     |                        |           |        |               |  |  |
| Calculated                             | Observed | +/- ppm | start | end | Sequence               | Ion Score | C.I. % | Modification  |  |  |
| 1526.5501                              | 509.6814 |         | 76    | 88  | K.TCVADENAENCDK.S      | 11        |        |               |  |  |
| 698.4439                               | 699.279  |         | 213   | 219 | K.ALVAAYR.Q            | 15        |        |               |  |  |
| 1327.5795                              | 443.2209 |         | 220   | 229 | R.QRMKCSSMQR.F         | 10        |        | Oxidation (M) |  |  |
| 1507.8048                              | 503.8409 |         | 230   | 242 | R.FGERAFKAWAVAR.M      | 19        |        |               |  |  |
| 1018.5712                              | 510.9404 |         | 234   | 242 | R.AFKAWAVAR.M          | 31        |        |               |  |  |
| 530.3064                               | 532.858  |         | 282   | 286 | R.AELAK.Y              | 6         |        |               |  |  |
| 1959.0425                              | 653.8612 |         | 435   | 452 | R.YTQKAPQVSTPTLVEAAR.N | 55        |        |               |  |  |
| 1959.0425                              | 654.8194 |         | 435   | 452 | R.YTQKAPQVSTPTLVEAAR.N | 24        |        |               |  |  |
| 1099.6601                              | 550.7199 |         | 549   | 558 | K.KQTALAELVK.H         | 53        |        |               |  |  |
| 971.5651                               | 486.6784 |         | 550   | 558 | K.QTALAELVK.H          | 62        |        |               |  |  |
| 1293.7041                              | 432.1369 |         | 559   | 569 | K.HKPKATEDQLK.T        | 10        |        |               |  |  |
| 1948.8949                              | 650.4379 |         | 585   | 602 | K.AADKDNCFATEGPNLVAR.S | 44        |        |               |  |  |
| 1948.8949                              | 975.7209 |         | 585   | 602 | K.AADKDNCFATEGPNLVAR.S | 34        |        |               |  |  |

# Spot 110 (A9 20080606) - Protein DJ-1 (Park7, Cap1)

SUB (4700 Reflector Spec #1 MC=>BC=>MC[BP = 842.5, 71852] , <<A1\_MS\_1>> 4700 Reflector Spec #1 MC=>BC=>MC[BP = 882.6, 21

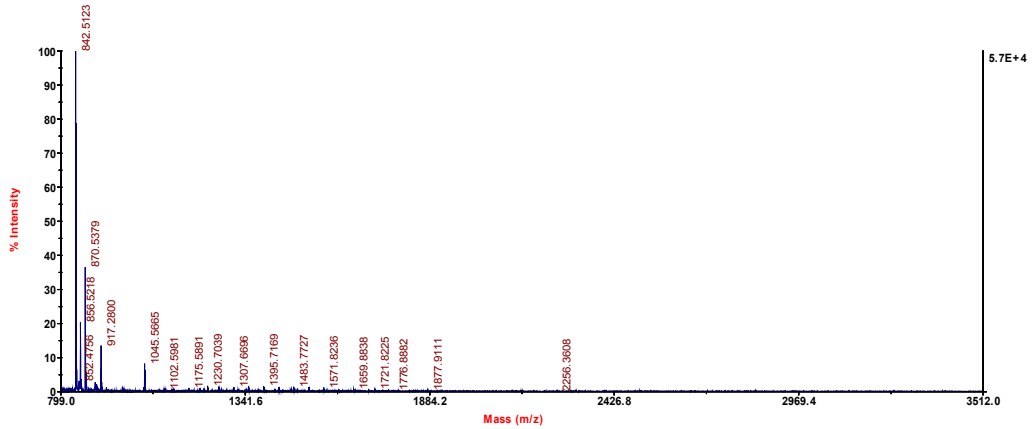

| Spot 110 (20080606.A9) Park7, Cap1 |           |        |       |     |                  |           |
|------------------------------------|-----------|--------|-------|-----|------------------|-----------|
| MS+MS/MS                           |           |        |       |     |                  |           |
| Calculated                         | Observed  | +/-ppm | start | end | Sequence         | Ion Score |
| 852.4937                           | 852.4921  | -2     | 123   | 130 | VTSHPPLAK        |           |
| 874.4992                           | 874.5054  | 7      | 149   | 156 | DGLILTSR         | 0         |
| 874.4992                           | 874.5054  | 7      | 149   | 156 | DGLILTSR         |           |
| 1230.7052                          | 1230.7064 | 1      | 146   | 156 | VEKDGLILTSR      |           |
| 1230.7052                          | 1230.7064 | 1      | 146   | 156 | VEKDGLILTSR      | 18        |
| 1721.8085                          | 1721.822  | 8      | 13    | 27  | GAEEMETVIPVDIMR  | 97.931    |
| 1877.9095                          | 1877.8989 | -6     | 13    | 28  | GAEEMETVIPVDIMRR |           |

| Spot 110 (20080606.A9) Park7, Cap1 |           |        |       |     |                      |           |
|------------------------------------|-----------|--------|-------|-----|----------------------|-----------|
| PMF/MALDI                          |           |        |       |     |                      |           |
| Calculated                         | Observed  | +/-ppm | start | end | Sequence             | Ion Score |
| 1720.8012                          | 1721.8225 | 8      | 13    | 27  | K.GAEEMETVIPVDIMR.R  |           |
| 1876.9023                          | 1877.9111 | 1      | 13    | 28  | K.GAEEMETVIPVDIMRR.A |           |
| 1286.699                           | 1286.7192 | 10     | 90    | 99  | K.EILKEQENRK.G       |           |
| 802.3933                           | 803.4377  | 46     | 94    | 99  | K.EQENRK.G           |           |
| 851.4865                           | 852.4756  | -21    | 123   | 130 | K.VTSHPPLAK.D        |           |
| 1229.6979                          | 1230.7039 | -1     | 146   | 156 | R.VEKDGLILTSR.G      |           |
| 873.492                            | 874.5     | 1      | 149   | 156 | K.DGLILTSR.G         |           |



**Spot 113 (C17 20080606) - Aldehyde dehydrogenase, mitochondrial precursor (Aldh2) and/or ATP synthase subunit alpha, mitochondrial precursor (Chain A, Rat Liver F1-ATPase) (Atp5a1)**

SUB (4700 Reflector Spec #1 MC=>BC=>MC[BP = 882.6, 9713] , <<C1\_MS\_1>> 4700 Reflector Spec #1 MC=>BC=>MC[BP = 882.6, 673

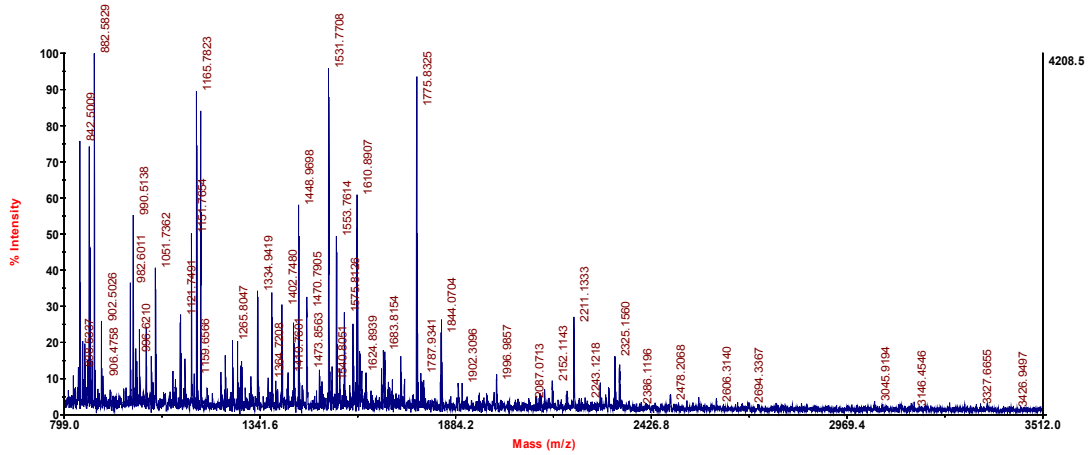

| Spot 113 (20080606-C17) Aldh2 |           |        |       |     |                     |           |                    |
|-------------------------------|-----------|--------|-------|-----|---------------------|-----------|--------------------|
| MS•MS/MS                      |           |        |       |     |                     |           |                    |
| Calculated                    | Observed  | +/-ppm | start | end | Sequence            | Ion Score | C.I.% Modification |
| 902.4941                      | 902.498   | 4      | 431   | 438 | TIEEVVGR            |           |                    |
| 990.5002                      | 990.5061  | 6      | 349   | 357 | VVGNPFDSR           |           |                    |
| 1177.6575                     | 1177.6609 | 3      | 429   | 438 | FKTIEEVVGR          |           |                    |
| 1177.6575                     | 1177.6609 | 3      | 429   | 438 | FKTIEEVVGR          |           |                    |
| 1402.7227                     | 1402.722  | 0      | 84    | 96  | AAQAAFQLGSPWR       |           |                    |
| 1470.7627                     | 1470.7615 | -1     | 397   | 409 | GYFIQPTVFGDVK       |           |                    |
| 1531.7428                     | 1531.7408 | -1     | 162   | 174 | TIPIDGFFSYTR        |           |                    |
| 1531.7428                     | 1531.7408 | -1     | 162   | 174 | TIPIDGFFSYTR        | 25        | 99.824             |
| 1599.79                       | 1599.7871 | -2     | 495   | 508 | ELGEYGLQAYTEVK      |           |                    |
| 1775.8123                     | 1775.7914 | -12    | 327   | 340 | TFVGEDVYDEFVER      | 32        | 99.963             |
| 1775.8123                     | 1775.7914 | -12    | 327   | 340 | TFVGEDVYDEFVER      |           |                    |
| 1844.0527                     | 1844.0297 | -12    | 212   | 228 | VAEQTPLTALYVANLIK   |           |                    |
| 1844.0527                     | 1844.0297 | -12    | 212   | 228 | VAEQTPLTALYVANLIK   |           |                    |
| 2152.1028                     | 2152.0618 | -19    | 410   | 428 | DGMTIAKEEIFGPVMQILK |           | 2 Oxidation (M)    |

| Spot 113 (20080606-C17) Aldh2 |           |        |       |     |                            |           |                    |
|-------------------------------|-----------|--------|-------|-----|----------------------------|-----------|--------------------|
| PMF/MALDI                     |           |        |       |     |                            |           |                    |
| Calculated                    | Observed  | +/-ppm | start | end | Sequence                   | Ion Score | C.I.% Modification |
| 1699.9158                     | 1700.8511 | -42    | 81    | 96  | K.AVKAQAQAAFQLGSPWR.R      |           |                    |
| 1401.7153                     | 1402.748  | 18     | 84    | 96  | K.AAQAQAAFQLGSPWR.R        |           |                    |
| 1373.803                      | 1374.7617 | -35    | 106   | 116 | R.LLYRLADLIER.D            |           |                    |
| 1099.5985                     | 1100.6288 | 21     | 110   | 118 | R.LADLIERDR.T              |           |                    |
| 1457.6728                     | 1458.7109 | 21     | 150   | 161 | R.YYAGWADKYHGK.T           |           |                    |
| 1530.7355                     | 1531.7708 | 18     | 162   | 174 | K.TIPIDGFFSYTR.H           |           |                    |
| 1368.7799                     | 1369.7545 | -24    | 198   | 211 | K.LGPLATGNVVMKV            |           |                    |
| 1364.7748                     | 1365.8029 | 15     | 198   | 211 | K.LGPLATGNVVMKV            |           | Oxidation (M)      |
| 1843.0455                     | 1844.0704 | 10     | 212   | 228 | K.VAEQTPLTALYVANLIK.E      |           |                    |
| 1774.805                      | 1775.8325 | 11     | 327   | 340 | R.TFVGEDVYDEFVER.S         |           |                    |
| 1232.6262                     | 1233.6631 | 24     | 347   | 357 | K.SRVVGNPFDSR.T            |           |                    |
| 989.4931                      | 990.5138  | 14     | 349   | 357 | R.VVGNPFDSR.T              |           |                    |
| 2477.1823                     | 2478.2068 | 7      | 349   | 370 | R.VVGNPFDSRTEQGPQVDETQFK.K |           |                    |
| 1505.6398                     | 1506.7349 | 18     | 358   | 370 | R.TEQGPQVDETQFK.K          |           |                    |
| 1633.7948                     | 1634.8286 | 16     | 358   | 371 | R.TEQGPQVDETQFK.I          |           |                    |
| 1469.7555                     | 1470.7905 | 19     | 397   | 409 | R.GYFIQPTVFGDVK.D          |           |                    |
| 2151.0856                     | 2152.1143 | 5      | 410   | 428 | K.DGMTIAKEEIFGPVMQILK.F    |           | 2 Oxidation (M)    |
| 1418.7479                     | 1419.7601 | 3      | 417   | 428 | K.EEIFGPVMQILK.F           |           | Oxidation (M)      |
| 1176.6503                     | 1177.6763 | 16     | 429   | 438 | K.FKTIEEVVGR.A             |           |                    |
| 901.4869                      | 902.5026  | 9      | 431   | 438 | K.TIEEVVGR.A               |           |                    |
| 1415.7368                     | 1416.6957 | -41    | 431   | 443 | K.TIEEVVGRANNSK.Y          |           |                    |
| 1039.5702                     | 1040.6001 | 22     | 444   | 453 | K.YGLAAAVFTK.D             |           |                    |
| 2190.0263                     | 2191.0471 | 6      | 489   | 508 | K.MSGSGRELQAYTEVK.T        |           | Oxidation (M)      |
| 1598.7828                     | 1599.8193 | 18     | 495   | 508 | R.ELGEYGLQAYTEVK.T         |           |                    |

| Spot 113 (20080606-C17) Atp5a1 |           |        |       |     |                       |           |       |               |  |
|--------------------------------|-----------|--------|-------|-----|-----------------------|-----------|-------|---------------|--|
| MS•MS/MS                       |           |        |       |     |                       |           |       |               |  |
| Calculated                     | Observed  | +/-ppm | start | end | Sequence              | Ion Score | C.I.% | Modification  |  |
| 1026.5942                      | 1026.5966 | 4      | 195   | 204 | AVDSLVPVIGR           |           |       |               |  |
| 1120.7201                      | 1120.7275 | 7      | 172   | 182 | VGLKAPGIIPR           |           |       |               |  |
| 1374.741                       | 1374.7386 | -2     | 183   | 194 | ISVREPMQTGIK          |           |       | Oxidation (M) |  |
| 1548.8679                      | 1548.9358 | 44     | 317   | 329 | QAVAYRQMSLLLR         |           |       |               |  |
| 1553.7383                      | 1553.7302 | -5     | 335   | 347 | EAYPGDVFYLHSR         |           |       |               |  |
| 1562.9125                      | 1562.9498 | 24     | 74    | 88  | VLSIGDGIARVHGLR       |           |       |               |  |
| 1575.786                       | 1575.7811 | -3     | 59    | 73  | ILGADTSVDLEETGR       |           |       |               |  |
| 1610.8748                      | 1610.8588 | -10    | 134   | 149 | TGAIVDVPVGDPELLGR     |           |       |               |  |
| 1610.8748                      | 1610.8588 | -10    | 134   | 149 | TGAIVDVPVGDPELLGR     |           |       |               |  |
| 1683.7894                      | 1683.7787 | -6     | 89    | 103 | NVQAEEMVEFSSGLK       |           |       | Oxidation (M) |  |
| 2325.1543                      | 2325.0901 | -28    | 473   | 493 | QGQYSPMAIEEQVAVIYAGVR |           |       | Oxidation (M) |  |
| 2338.1672                      | 2338.0771 | -39    | 442   | 463 | EVAFAFGSDLDAAATQQLLSR |           |       |               |  |

| Spot 113 (20080606-C17) Atp5a1 |           |        |       |     |                           |           |       |               |  |
|--------------------------------|-----------|--------|-------|-----|---------------------------|-----------|-------|---------------|--|
| PMF/MALDI                      |           |        |       |     |                           |           |       |               |  |
| Calculated                     | Observed  | +/-ppm | start | end | Sequence                  | Ion Score | C.I.% | Modification  |  |
| 1791.9036                      | 1792.8829 | -16    | 43    | 58  | R.LGKTGTAEMSSILEER.I      |           |       |               |  |
| 1574.7788                      | 1575.8126 | 17     | 59    | 73  | R.ILGADTSVDLEETGR.V       |           |       |               |  |
| 999.5713                       | 1000.5901 | 12     | 74    | 83  | R.VLSIGDGIAR.V            |           |       |               |  |
| 1682.7821                      | 1683.8154 | 15     | 89    | 103 | R.NVQAEEMVEFSSGLK.G       |           |       | Oxidation (M) |  |
| 1609.8676                      | 1610.8907 | 10     | 134   | 149 | R.TGAIVDVPVGDPELLGR.V     |           |       |               |  |
| 1119.7128                      | 1120.7435 | 21     | 172   | 182 | R.VGLKAPGIIPR.I           |           |       |               |  |
| 1373.7337                      | 1374.7617 | 15     | 183   | 194 | R.ISVREPMQTGIK.A          |           |       | Oxidation (M) |  |
| 1025.5869                      | 1026.6107 | 16     | 195   | 204 | R.AVDSLVPVIGR.G           |           |       |               |  |
| 1315.7347                      | 1316.7632 | 16     | 219   | 230 | K.TSIAIDTIINQK.R          |           |       |               |  |
| 1471.8358                      | 1472.8187 | -17    | 219   | 231 | K.TSIAIDTIINQK.F          |           |       |               |  |
| 1700.8733                      | 1701.8809 | 0      | 302   | 316 | R.DNGKHALIYDDLKQ          |           |       |               |  |
| 1286.687                       | 1287.7264 | 25     | 306   | 316 | K.HALIIYDDLKQ             |           |       |               |  |
| 875.4899                       | 876.4999  | 3      | 323   | 329 | R.QMSLLLR.R               |           |       | Oxidation (M) |  |
| 1552.731                       | 1553.7614 | 15     | 335   | 347 | R.EAYPGDVFYLHSR.L         |           |       |               |  |
| 1134.5815                      | 1135.6057 | 15     | 417   | 427 | R.VGSAAGTRAMK.Q           |           |       | Oxidation (M) |  |
| 1622.845                       | 1623.8705 | 11     | 428   | 441 | K.QVAGTMKLELAQYR.E        |           |       | Oxidation (M) |  |
| 2337.1601                      | 2338.1392 | -12    | 442   | 463 | R.EVAFAFGSDLDAAATQQLLSR.G |           |       |               |  |
| 2324.1471                      | 2325.156  | 1      | 473   | 493 | K.QGQYSPMAIEEQVAVIYAGVR.G |           |       | Oxidation (M) |  |

# Spot 124 (D10 20070719) – Protein disulfide-isomerase A3 (Pdia3)

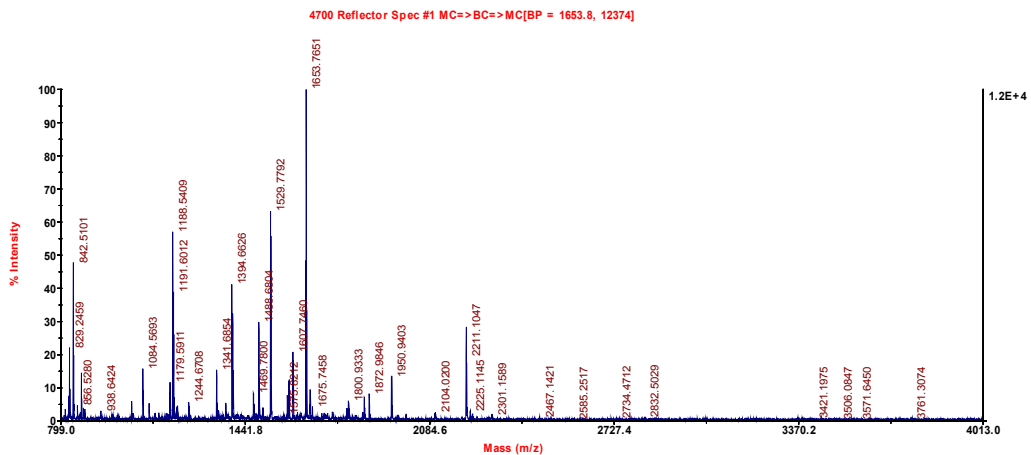

| Spot 124 (20070719-D10) Pdia3 |           |        |       |     |                  |           |                      |
|-------------------------------|-----------|--------|-------|-----|------------------|-----------|----------------------|
| MS•MS/MS                      |           |        |       |     |                  |           |                      |
| Calculated                    | Observed  | +/-ppm | start | end | Sequence         | Ion Score | C.I.% Modification   |
| 866.4617                      | 866.4696  | 8      | 416   | 422 | YKELGEK          |           |                      |
| 877.489                       | 877.4948  | 7      | 297   | 304 | LNFVAVASR        |           |                      |
| 938.6396                      | 938.6415  | 2      | 74    | 82  | LKGVPLAK         |           |                      |
| 995.6632                      | 995.6713  | 8      | 131   | 140 | QAGPASVPLR       |           |                      |
| 1084.5674                     | 1084.5696 | 2      | 95    | 104 | YGVSGYPTLK       |           |                      |
| 1168.6695                     | 1168.6838 | 13     | 120   | 130 | TADGVSHLKK       |           |                      |
| 1179.5865                     | 1179.5922 | 5      | 174   | 183 | AASNLRDNYR       |           |                      |
| 1188.5354                     | 1188.5417 | 5      | 336   | 344 | FVMQEEFSR        |           | Oxidation (M)        |
| 1188.5354                     | 1188.5417 | 5      | 336   | 344 | FVMQEEFSR        | 19        | 98.726 Oxidation (M) |
| 1191.6005                     | 1191.6027 | 2      | 63    | 73  | LAPEYEAATR       |           |                      |
| 1197.7201                     | 1197.7302 | 8      | 423   | 433 | LSKDPNVIK        |           |                      |
| 1244.6633                     | 1244.6726 | 7      | 184   | 194 | FAHTNVEVLK       |           |                      |
| 1341.6837                     | 1341.6868 | 2      | 449   | 460 | GFPTIYSPANK      |           |                      |
| 1341.6837                     | 1341.6868 | 2      | 449   | 460 | GFPTIYSPANK      | 61        | 100                  |
| 1347.7015                     | 1347.7002 | -1     | 62    | 73  | LAPEYEAATR       |           |                      |
| 1373.6736                     | 1373.6775 | 3      | 352   | 362 | FLQEYFDGNLK      |           |                      |
| 1394.6587                     | 1394.6625 | 3      | 162   | 173 | DLFSDGHSEFLK     | 56        | 100                  |
| 1394.6587                     | 1394.6625 | 3      | 162   | 173 | DLFSDGHSEFLK     |           |                      |
| 1397.7059                     | 1397.7092 | 2      | 472   | 482 | ELNDFISYLR       |           |                      |
| 1469.7767                     | 1469.7808 | 1      | 449   | 461 | GFPTIYSPANK      |           |                      |
| 1468.6767                     | 1468.683  | 3      | 336   | 347 | FVMQEEFSRDGK     |           | Oxidation (M)        |
| 1468.6767                     | 1468.683  | 3      | 336   | 347 | FVMQEEFSRDGK     |           | Oxidation (M)        |
| 1502.6943                     | 1502.7043 | 7      | 333   | 344 | GEKFMQEEFSR      |           | Oxidation (M)        |
| 1529.7747                     | 1529.7817 | 5      | 352   | 363 | FLQEYFDGNLKR     |           |                      |
| 1529.7747                     | 1529.7817 | 5      | 352   | 363 | FLQEYFDGNLKR     | 69        | 100                  |
| 1587.8165                     | 1587.826  | 6      | 148   | 161 | FISDKDASVGFRR    |           |                      |
| 1593.8483                     | 1593.8506 | 1      | 483   | 496 | EATNPPIQEEKPK    |           |                      |
| 1593.8483                     | 1593.8506 | 1      | 483   | 496 | EATNPPIQEEKPK    | 21        | 99.247               |
| 1607.7476                     | 1607.749  | 1      | 259   | 271 | DLTAYVDVYEK      |           |                      |
| 1607.7476                     | 1607.749  | 1      | 259   | 271 | DLTAYVDVYEK      | 30        | 99.899               |
| 1652.7662                     | 1652.7681 | 1      | 105   | 119 | IFRDGEEAGAYDGPR  |           |                      |
| 1652.7662                     | 1652.7681 | 1      | 105   | 119 | IFRDGEEAGAYDGPR  | 25        | 99.722               |
| 1721.9432                     | 1721.9537 | 6      | 483   | 497 | EATNPPIQEEKPKK   |           |                      |
| 1800.9377                     | 1800.9374 | 0      | 364   | 379 | YKSEPIPETEGPVK   |           |                      |
| 1850.0382                     | 1850.0476 | 5      | 483   | 498 | EATNPPIQEEKPKKK  |           |                      |
| 1872.9813                     | 1872.9875 | 3      | 131   | 147 | QAGPASVPLRTEDEFK |           |                      |
| 1950.9331                     | 1950.9434 | 5      | 259   | 274 | DLTAYVDVYEKNTK   |           |                      |
| 1950.9331                     | 1950.9434 | 5      | 259   | 274 | DLTAYVDVYEKNTK   | 95        | 100                  |

| Spot 124 (20070719-D10) Pdia3 |           |        |       |     |                              |                              |
|-------------------------------|-----------|--------|-------|-----|------------------------------|------------------------------|
| PMF/MALDI                     |           |        |       |     |                              |                              |
| Calculated                    | Observed  | +/-ppm | start | end | Sequence                     | Ion Score C.I.% Modification |
| 1346.6942                     | 1347.6978 | -3     | 62    | 73  | K.RLAPEYEAATR.L              |                              |
| 1190.5931                     | 1191.6012 | 1      | 63    | 73  | R.LAPEYEAATR.L               |                              |
| 937.6324                      | 938.6424  | 3      | 74    | 82  | R.LKGVPLAK.V                 |                              |
| 1083.5601                     | 1084.5693 | 2      | 95    | 104 | K.YGVSGYPTLKI                |                              |
| 1651.759                      | 1652.7646 | -1     | 105   | 119 | K.IFRDGEEAGYDGPR.T           |                              |
| 1039.5662                     | 1040.5762 | 5      | 120   | 129 | R.TADGIVSHLK.K               |                              |
| 1167.6612                     | 1168.6659 | 15     | 120   | 130 | R.TADGIVSHLKK.Q              |                              |
| 994.556                       | 995.5738  | 11     | 131   | 140 | K.QAGPASVPLR.T               |                              |
| 1743.8791                     | 1744.8855 | -1     | 131   | 146 | K.QAGPASVPLRTEDEFK.K         |                              |
| 1586.8093                     | 1587.8254 | 6      | 148   | 161 | K.FISDKDASVYGFRR.D           |                              |
| 1393.6514                     | 1394.6626 | 3      | 162   | 173 | R.DLFDGSHSEFLK.A             |                              |
| 1178.5792                     | 1179.5911 | 4      | 174   | 183 | K.AASNLRDNYR.F               |                              |
| 1243.6561                     | 1244.6708 | 6      | 184   | 194 | R.FAHTNVESLVK.E              |                              |
| 1606.7403                     | 1607.746  | -1     | 259   | 271 | K.DLLTAYTDVDYEK.N            |                              |
| 1949.9258                     | 1950.9403 | 4      | 259   | 274 | K.DLLTAYTDVDYEKNTK.G         |                              |
| 1124.5363                     | 1125.5505 | 42     | 272   | 280 | K.NTKGSNYWR.N                |                              |
| 979.4943                      | 980.5265  | 25     | 281   | 288 | R.NRVMMVAK.T                 | 2 Oxidation (M)              |
| 1745.9213                     | 1746.9218 | -4     | 289   | 304 | K.TFLDAGHKLNFVAASR.K         |                              |
| 876.4817                      | 877.4951  | 7      | 297   | 304 | K.LNFVAASR.K                 |                              |
| 2604.3072                     | 2605.2864 | -11    | 306   | 329 | K.TFSHELSDFGLESTTGEIPVVAIR.T |                              |
| 1501.6871                     | 1502.7021 | 5      | 333   | 344 | K.GEFVMOEEFSR.D              | Oxidation (M)                |
| 1171.5332                     | 1172.5309 | -8     | 336   | 344 | K.FVMQEEFSR.D                |                              |
| 1187.5281                     | 1188.5409 | 5      | 336   | 344 | K.FVMQEEFSR.D                | Oxidation (M)                |
| 1471.6766                     | 1472.7472 | 43     | 336   | 347 | K.FVMQEEFSRDGK.A             |                              |
| 1487.6715                     | 1488.6804 | 1      | 336   | 347 | K.FVMQEEFSRDGK.A             | Oxidation (M)                |
| 1372.6663                     | 1373.6779 | 3      | 352   | 362 | R.FLQEYFDGNLKR               |                              |
| 1528.7674                     | 1529.7792 | 3      | 352   | 363 | R.FLQEYFDGNLKR.Y             |                              |
| 1799.9305                     | 1800.9334 | -2     | 364   | 379 | R.YLKSEPIPETNEGPKV.V         |                              |
| 865.4545                      | 866.4681  | 7      | 416   | 422 | K.YKELGK.L                   |                              |
| 1196.7128                     | 1197.7245 | 4      | 423   | 433 | K.LSKDPNMAK.M                |                              |
| 1340.6765                     | 1341.6854 | 1      | 449   | 460 | K.GFPTIYFSPANK.K             |                              |
| 1468.7714                     | 1469.78   | 1      | 449   | 461 | K.GFPTIYFSPANKK.L            |                              |
| 1396.6967                     | 1397.7069 | 1      | 472   | 482 | R.ELNDFISYLQR.E              |                              |
| 1592.8409                     | 1593.8491 | 1      | 483   | 496 | R.EATNPPIQEEKPK.K            |                              |
| 1720.9359                     | 1721.9529 | 6      | 483   | 497 | R.EATNPPIQEEKPKK.K           |                              |

### Spot 124 (A21 20080606) - Protein disulfide-isomerase A3 (Pdia3)

SUB (4700 Reflector Spec #1 MC=>BC=>MC[BP = 842.5, 62178] , <<A1\_MS\_1>> 4700 Reflector Spec #1 MC=>BC=>MC[BP = 882.6, 21

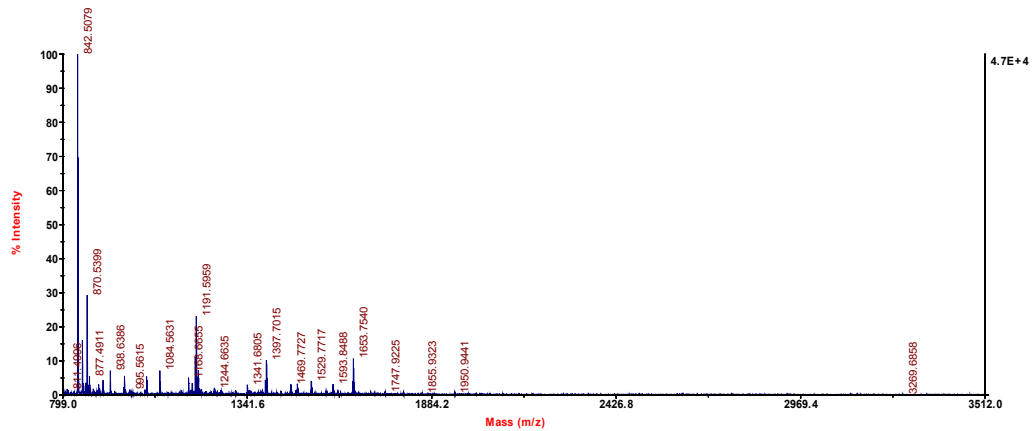

| Spot 124 (20080606-A21) Pdia3 |           |        |       |     |                 |           |        |                 |  |  |
|-------------------------------|-----------|--------|-------|-----|-----------------|-----------|--------|-----------------|--|--|
| MS•MS/MS                      |           |        |       |     |                 |           |        |                 |  |  |
| Calculated                    | Observed  | +/-ppm | start | end | Sequence        | Ion Score | C.I.%  | Modification    |  |  |
| 866.4617                      | 866.4694  | 9      | 416   | 422 | YKELGEK         | 2         | 5.539  |                 |  |  |
| 866.4617                      | 866.4694  | 9      | 416   | 422 | YKELGEK         |           |        |                 |  |  |
| 877.489                       | 877.4922  | 4      | 297   | 304 | LNFVAVASR       |           |        |                 |  |  |
| 877.489                       | 877.4922  | 4      | 297   | 304 | LNFVAVASR       |           |        |                 |  |  |
| 888.4573                      | 888.4609  | 4      | 289   | 296 | TFLDAGHK        |           |        |                 |  |  |
| 938.6396                      | 938.6396  | -1     | 74    | 82  | LKGVPLAK        | 18        | 97.583 |                 |  |  |
| 938.6396                      | 938.6396  | -1     | 74    | 82  | LKGVPLAK        |           |        |                 |  |  |
| 951.5509                      | 951.5461  | -5     | 219   | 226 | IVAYTEKK        |           |        |                 |  |  |
| 980.5015                      | 980.5021  | 1      | 281   | 288 | NRVMMVAK        |           |        | 2 Oxidation (M) |  |  |
| 995.5632                      | 995.5636  | 0      | 131   | 140 | QAGPASVPLR      |           |        |                 |  |  |
| 1040.5735                     | 1040.574  | 0      | 120   | 129 | TADGIVSHLK      |           |        |                 |  |  |
| 1084.5674                     | 1084.5657 | -2     | 95    | 104 | YGVSGYPTLK      |           |        |                 |  |  |
| 1084.5674                     | 1084.5657 | -2     | 95    | 104 | YGVSGYPTLK      | 35        | 99.954 |                 |  |  |
| 1168.6685                     | 1168.6705 | 2      | 120   | 130 | TADGIVSHLKK     | 18        | 97.75  |                 |  |  |
| 1168.6685                     | 1168.6705 | 2      | 120   | 130 | TADGIVSHLKK     |           |        |                 |  |  |
| 1179.5865                     | 1179.5866 | -1     | 174   | 183 | AASNLRDNYR      |           |        |                 |  |  |
| 1179.5865                     | 1179.5866 | -1     | 174   | 183 | AASNLRDNYR      |           |        |                 |  |  |
| 1188.6354                     | 1188.6331 | -2     | 336   | 344 | FVMQEEFSR       |           |        | Oxidation (M)   |  |  |
| 1191.6005                     | 1191.5986 | -2     | 63    | 73  | LAPEYEAATR      |           |        |                 |  |  |
| 1191.6005                     | 1191.5986 | -2     | 63    | 73  | LAPEYEAATR      | 41        | 99.989 |                 |  |  |
| 1197.7201                     | 1197.7175 | -2     | 423   | 433 | LSKDPNVIK       |           |        |                 |  |  |
| 1197.7201                     | 1197.7175 | -2     | 423   | 433 | LSKDPNVIK       |           |        |                 |  |  |
| 1244.6633                     | 1244.6604 | -2     | 184   | 194 | FAHTNVESLVK     |           |        |                 |  |  |
| 1341.6837                     | 1341.6836 | 0      | 449   | 460 | GFPTIYFSPANK    |           |        |                 |  |  |
| 1347.7015                     | 1347.6963 | -4     | 62    | 73  | RLAPEYEAATR     |           |        |                 |  |  |
| 1394.6587                     | 1394.6566 | -2     | 162   | 173 | DLFSDGHSEFLK    |           |        |                 |  |  |
| 1397.7059                     | 1397.7043 | -1     | 472   | 482 | ELNDFISYLQR     |           |        |                 |  |  |
| 1397.7059                     | 1397.7043 | -1     | 472   | 482 | ELNDFISYLQR     | 22        | 99.033 |                 |  |  |
| 1469.7787                     | 1469.7772 | -1     | 449   | 461 | GFPTIYFSPANKK   |           |        |                 |  |  |
| 1469.7787                     | 1469.7772 | -1     | 449   | 461 | GFPTIYFSPANKK   | 28        | 99.756 |                 |  |  |
| 1488.6787                     | 1488.6748 | -3     | 336   | 347 | FVMQEEFSRDGK    |           |        | Oxidation (M)   |  |  |
| 1529.7747                     | 1529.7716 | -2     | 352   | 363 | FLQEIFDGNLKR    |           |        |                 |  |  |
| 1529.7747                     | 1529.7716 | -2     | 352   | 363 | FLQEIFDGNLKR    | 38        | 99.979 |                 |  |  |
| 1587.8165                     | 1587.8143 | -1     | 148   | 161 | FISDKDASVGFRR   |           |        |                 |  |  |
| 1593.8483                     | 1593.8505 | 1      | 483   | 496 | EATNPPIQEEKPK   |           |        |                 |  |  |
| 1593.8483                     | 1593.8505 | 1      | 483   | 496 | EATNPPIQEEKPK   | 6         | 64.169 |                 |  |  |
| 1607.7476                     | 1607.7432 | -3     | 259   | 271 | DLTAYYDVDYEK    |           |        |                 |  |  |
| 1652.7472                     | 1652.755  | 5      | 434   | 448 | MDATANDVPSPYEVK |           |        | Oxidation (M)   |  |  |
| 1652.7662                     | 1652.755  | -7     | 105   | 119 | IFRDGEEAGYDGPR  | 11        | 89.948 |                 |  |  |

| Spot 124 (20080606-A21) Pdia3 |           |        |       |     |                     |           |       |                 |  |  |
|-------------------------------|-----------|--------|-------|-----|---------------------|-----------|-------|-----------------|--|--|
| PMF/MALDI                     |           |        |       |     |                     |           |       |                 |  |  |
| Calculated                    | Observed  | +/-ppm | start | end | Sequence            | Ion Score | C.I.% | Modification    |  |  |
| 1346.6942                     | 1347.6969 | -3     | 62    | 73  | K.LAPEYEAATR.L      |           |       |                 |  |  |
| 1190.5931                     | 1191.5959 | -4     | 63    | 73  | R.LAPEYEAATR.L      |           |       |                 |  |  |
| 937.6324                      | 938.6387  | -1     | 74    | 82  | R.LKGVPLAK.V        |           |       |                 |  |  |
| 1083.5601                     | 1084.5631 | -4     | 95    | 104 | K.YGVSGYPTLK.I      |           |       |                 |  |  |
| 1235.5054                     | 1236.5073 | -4     | 108   | 119 | R.DGEEAGAYDGPR.T    |           |       |                 |  |  |
| 1039.5662                     | 1040.5709 | -2     | 120   | 129 | R.TADGIVSHLK.K      |           |       |                 |  |  |
| 1167.6612                     | 1168.6655 | -2     | 120   | 130 | R.TADGIVSHLKK.Q     |           |       |                 |  |  |
| 994.566                       | 995.5616  | -2     | 131   | 140 | K.QAGPASVPLR.T      |           |       |                 |  |  |
| 1586.8093                     | 1587.8108 | -4     | 148   | 161 | K.FISDKDASVGFRR.D   |           |       |                 |  |  |
| 1393.6514                     | 1394.6555 | -2     | 162   | 173 | R.DLFSDGHSEFLK.A    |           |       |                 |  |  |
| 1178.5792                     | 1179.5848 | -1     | 174   | 183 | K.AASNLRDNYR.F      |           |       |                 |  |  |
| 1243.6561                     | 1244.6635 | 0      | 184   | 194 | R.FAHTNVESLVK.E     |           |       |                 |  |  |
| 950.5437                      | 951.5482  | -3     | 219   | 226 | K.IVAYTEKK.M        |           |       |                 |  |  |
| 1606.7403                     | 1607.7469 | 0      | 259   | 271 | K.DLTAYYDVDYEK.N    |           |       |                 |  |  |
| 1949.9258                     | 1950.9441 | -1     | 281   | 288 | R.NRVMMVAK.T        |           |       | 2 Oxidation (M) |  |  |
| 979.4943                      | 980.5002  | -1     | 281   | 288 | R.NRVMMVAK.T        |           |       |                 |  |  |
| 867.4501                      | 868.4617  | 5      | 289   | 296 | K.TFLDAGHK.L        |           |       |                 |  |  |
| 876.4817                      | 877.4911  | 2      | 297   | 304 | K.LNFVAVASR.K       |           |       |                 |  |  |
| 1485.6822                     | 1486.7593 | 40     | 333   | 344 | K.GEKFVMOEEFSR.D    |           |       |                 |  |  |
| 1187.5281                     | 1188.6309 | -4     | 336   | 344 | K.FVMQEEFSR.D       |           |       | Oxidation (M)   |  |  |
| 1487.6715                     | 1488.6713 | -5     | 336   | 347 | K.FVMQEEFSRDGK.A    |           |       | Oxidation (M)   |  |  |
| 1528.7674                     | 1529.7716 | -2     | 352   | 363 | R.FLQEIFDGNLKR.Y    |           |       |                 |  |  |
| 1799.9305                     | 1800.9391 | 1      | 364   | 379 | R.YLKSEPIPETNEGPK.V |           |       |                 |  |  |
| 1395.6882                     | 1396.6897 | -4     | 367   | 379 | K.SEPIPETNEGPK.V    |           |       |                 |  |  |
| 865.4545                      | 866.4642  | 3      | 416   | 422 | K.YKELGEK.L         |           |       |                 |  |  |
| 1196.7128                     | 1197.7148 | -4     | 423   | 433 | K.LSKDPNVIK.M       |           |       |                 |  |  |
| 1651.7399                     | 1652.7528 | 3      | 434   | 448 | K.MDATANDVPSPYEVK.G |           |       | Oxidation (M)   |  |  |
| 1340.6765                     | 1341.6805 | -2     | 449   | 460 | K.GFPTIYFSPANK.K    |           |       |                 |  |  |
| 1468.7714                     | 1469.7727 | -4     | 449   | 461 | K.GFPTIYFSPANKK.L   |           |       |                 |  |  |
| 1396.6987                     | 1397.7015 | -3     | 472   | 482 | R.ELNDFISYLQR.E     |           |       |                 |  |  |
| 1592.8409                     | 1593.8488 | 0      | 483   | 496 | R.EATNPPIQEEKPK.K   |           |       |                 |  |  |

### Spot 130 (P1014-06) – 14-3-3 protein epsilon (Ywhae)

| Spot 130 (P1014-06) Ywhae |         |                                                                      |                         |                   |                      |                    |               |                 |                           |              |                     |
|---------------------------|---------|----------------------------------------------------------------------|-------------------------|-------------------|----------------------|--------------------|---------------|-----------------|---------------------------|--------------|---------------------|
| LCMS/MS (Scaffold)        |         |                                                                      |                         |                   |                      |                    |               |                 |                           |              |                     |
| Sample Name               | Acc No. | Protein(s) inferred                                                  | No. Peptides identified | Sequence Coverage | Position in sequence | Peptide Sequence   | Precursor m/z | Charge observed | Calculated mass (neutral) | Mascot score | Mascot Expect value |
| P1014-06                  | P62260  | sp P62260 14-3-3 protein epsilon<br>Tax_id=10116 [Rattus norvegicus] | 1                       | 4.71%             | 1 - 12               | (-)mDDREDLVYQAK(L) | 762.70        | 2               | 1523.38                   | 48.6         | 5.12E-002           |

# Spot 132 (B12 20080606) - Peroxiredoxin-6 (Prdx6)

SUB [4700 Reflector Spec #1 MC=>BC=>MC[BP = 882.6, 8860] , <<A1\_MS\_1>> 4700 Reflector Spec #1 MC=>BC=>MC[BP = 882.6, 212

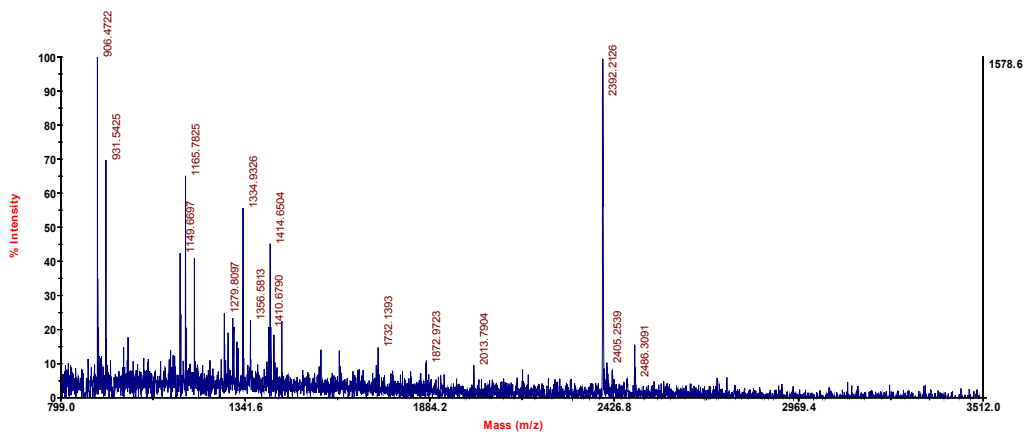

| Spot 132 (20080606-B12) Prdx6 |           |        |       |     |                        |     |
|-------------------------------|-----------|--------|-------|-----|------------------------|-----|
| MS•MS/MS                      |           |        |       |     |                        |     |
| Calculated                    | Observed  | +/-ppm | start | end | Sequence               |     |
| 906.4679                      | 906.4673  | -1     | 156   | 162 | NFDEILR                |     |
| 906.4679                      | 906.4673  | -1     | 156   | 162 | NFDEILR                | 2   |
| 931.5359                      | 931.5396  | 4      | 57    | 64  | LAPEFAKR               |     |
| 1045.604                      | 1045.5707 | -32    | 54    | 63  | AAKLAPEFAK             |     |
| 1149.6666                     | 1149.6783 | 10     | 133   | 142 | VVFIFGPDKK             |     |
| 1191.6732                     | 1191.6832 | 8      | 145   | 155 | LSILYPATTGR            |     |
| 2392.2256                     | 2392.2173 | -3     | 2     | 24  | PGLLLGDEAPNFEANTTIGHIR | 55  |
| 2392.2256                     | 2392.2173 | -3     | 2     | 24  | PGLLLGDEAPNFEANTTIGHIR | 100 |

| Spot 132 (20080606-B12) Prdx6 |           |        |       |     |                             |               |
|-------------------------------|-----------|--------|-------|-----|-----------------------------|---------------|
| PMF/MALDI                     |           |        |       |     |                             |               |
| Calculated                    | Observed  | +/-ppm | start | end | Sequence                    |               |
| 2391.2183                     | 2392.2126 | -5     | 2     | 24  | M.PGLLLGDEAPNFEANTTIGHIR.F  |               |
| 930.5267                      | 931.5425  | 7      | 57    | 64  | K.LAPEFAKR.N                |               |
| 1148.6594                     | 1149.6697 | 3      | 133   | 142 | R.VVFIFGPDKK.L              |               |
| 1190.6659                     | 1191.6793 | 5      | 145   | 155 | K.LSILYPATTGR.N             |               |
| 905.4607                      | 906.4722  | 5      | 156   | 162 | R.NFDEILR.V                 |               |
| 1871.955                      | 1872.9723 | 5      | 183   | 199 | K.KGESVMVLPPTLPEEEAK.Q      | Oxidation (M) |
| 2485.3138                     | 2486.3091 | -5     | 183   | 204 | K.KGESVMVLPPTLPEEEAKQLFPK.G | Oxidation (M) |

# Spot 137 (D2 20080606) – mixture of: 14-3-3 protein beta/alpha (Ywhab) and 14-3-3 protein zeta/delta (Ywhaz)

SUB (4700 Reflector Spec #1 MC=>BC=>MC[BP = 842.5, 56590] , <<C1\_MS\_1>> 4700 Reflector Spec #1 MC=>BC=>MC[BP = 882.6, 67

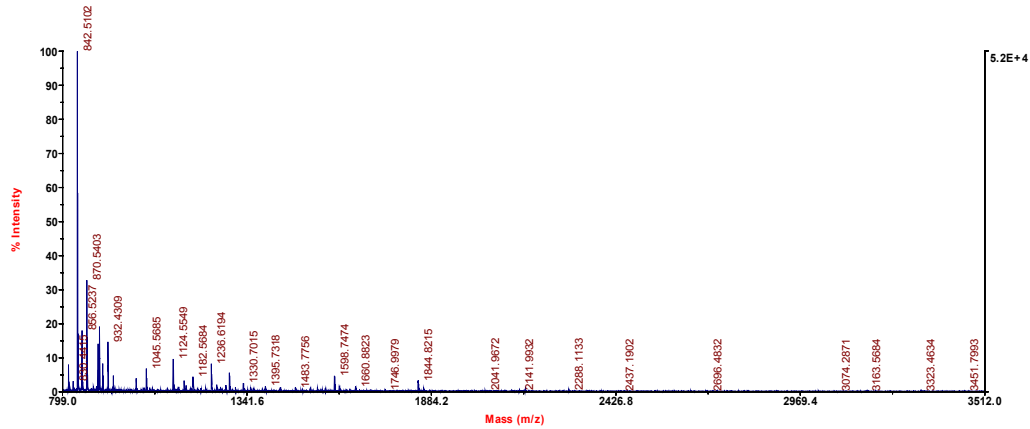

| Spot 137 (20080606-D2) Ywhab |           |        |       |     |                              |                 |
|------------------------------|-----------|--------|-------|-----|------------------------------|-----------------|
| PMF/MALDI                    |           |        |       |     |                              |                 |
| Calculated                   | Observed  | +/-ppm | start | end | Sequence                     |                 |
| 1014.5458                    | 1015.5552 | 2      | 12    | 20  | K.AKLAEQAER.Y                |                 |
| 815.4137                     | 816.4211  | 0      | 14    | 20  | K.LAEQAER.Y                  |                 |
| 1843.808                     | 1844.8215 | 3      | 14    | 29  | K.LAEQAERYDDMAAAMK.A         | 2 Oxidation (M) |
| 1597.7332                    | 1598.7474 | 4      | 30    | 43  | K.AVTEQGHLSNEER.N            |                 |
| 906.5174                     | 907.5248  | 0      | 44    | 51  | R.NLLSVAYK.N                 |                 |
| 1502.8569                    | 1503.8656 | 1      | 44    | 57  | R.NLLSVAYKNVVGAR.R           |                 |
| 1658.958                     | 1659.8936 | -43    | 44    | 58  | R.NLLSVAYKNVVGARR.S          |                 |
| 902.5073                     | 903.5159  | 1      | 63    | 70  | R.VISSIEGK.T                 |                 |
| 1288.6987                    | 1289.7085 | 2      | 63    | 73  | R.VISSIEGKTER.N              |                 |
| 1659.8791                    | 1660.8823 | -2     | 63    | 76  | R.VISSIEGKTERNEK.K           |                 |
| 1182.5815                    | 1183.5779 | -9     | 77    | 85  | K.KQMGKQYR.E                 | Oxidation (M)   |
| 1054.4866                    | 1055.4932 | -1     | 78    | 85  | K.QMGKQYR.E                  | Oxidation (M)   |
| 1398.7194                    | 1399.7396 | 7      | 106   | 117 | K.YULNATHAESK.V              |                 |
| 931.4222                     | 932.4309  | 2      | 123   | 129 | K.MKGDYFR.Y                  | Oxidation (M)   |
| 1181.5564                    | 1182.5694 | 4      | 130   | 140 | R.YLSEVAGDQNK.Q              |                 |
| 2158.0178                    | 2159.0479 | 11     | 141   | 159 | K.QTTVSNSSQQAQYQEAFAEISK.K   |                 |
| 2286.1128                    | 2287.1659 | 22     | 141   | 160 | K.QTTVSNSSQQAQYQEAFAEISK.K.E |                 |
| 1235.6445                    | 1236.6194 | -26    | 160   | 169 | K.KEMQPTHPIR.L               |                 |
| 1251.6394                    | 1252.6422 | -4     | 160   | 169 | K.KEMQPTHPIR.L               | Oxidation (M)   |
| 1123.5444                    | 1124.5549 | 3      | 161   | 169 | K.EMQPTHPIR.L                | Oxidation (M)   |
| 1204.6485                    | 1205.6566 | 1      | 215   | 224 | K.DSTLIMQLLR.D               | Oxidation (M)   |

| Spot 137 (20080606-D2) Ywhaz |           |        |       |     |                            |               |
|------------------------------|-----------|--------|-------|-----|----------------------------|---------------|
| PMF/MALDI                    |           |        |       |     |                            |               |
| Calculated                   | Observed  | +/-ppm | start | end | Sequence                   |               |
| 1014.5458                    | 1015.5552 | 2      | 10    | 18  | K.AKLAEQAER.Y              |               |
| 815.4137                     | 816.4211  | 0      | 12    | 18  | K.LAEQAER.Y                |               |
| 1547.7063                    | 1548.7156 | 1      | 28    | 41  | K.SYTEQGAELSNEER.N         |               |
| 2436.2132                    | 2437.1902 | -12    | 28    | 49  | K.SYTEQGAELSNEERNLLSVAYK.N |               |
| 906.5174                     | 907.5248  | 0      | 42    | 49  | R.NLLSVAYK.N               |               |
| 1502.8569                    | 1503.8656 | 1      | 42    | 55  | R.NLLSVAYKNVVGAR.R         |               |
| 1658.958                     | 1659.8936 | -43    | 42    | 56  | R.NLLSVAYKNVVGARR.S        |               |
| 868.4916                     | 869.496   | -3     | 61    | 68  | R.VVSSIEGK.T               |               |
| 1503.778                     | 1504.8394 | 32     | 61    | 74  | R.VVSSIEGKTEGAEK.K         |               |
| 1631.873                     | 1632.8785 | -2     | 61    | 75  | R.VVSSIEGKTEGAEKK.Q        |               |
| 1329.6928                    | 1330.7015 | -1     | 104   | 115 | K.FLIPNASQPEK.V            |               |
| 1597.7963                    | 1598.7474 | -35    | 116   | 127 | K.VFYLMKGDYR.Y             | Oxidation (M) |
| 931.4222                     | 932.4309  | 2      | 121   | 127 | K.MKGDYR.Y                 |               |
| 947.4171                     | 948.4271  | 3      | 121   | 127 | K.MKGDYR.Y                 | Oxidation (M) |
| 1278.6456                    | 1279.6515 | -1     | 128   | 139 | R.YLAEVAGDDKK.G            |               |
| 2039.98                      | 2040.9906 | 2      | 140   | 157 | K.GVDSQQAQYQEAFAEISK.K     |               |
| 1235.6445                    | 1236.6194 | -26    | 158   | 167 | K.KEMQPTHPIR.L             |               |
| 1251.6394                    | 1252.6422 | -4     | 158   | 167 | K.KEMQPTHPIR.L             | Oxidation (M) |
| 1123.5444                    | 1124.5549 | 3      | 159   | 167 | K.EMQPTHPIR.L              | Oxidation (M) |
| 1204.6485                    | 1205.6566 | 1      | 213   | 222 | K.DSTLIMQLLR.D             | Oxidation (M) |



# Spot 141 (D11 20080606) - Ubiquitin-conjugating enzyme E2N (Ube2n)

SUB (4700 Reflector Spec #1 MC=>BC=>MC[BP = 842.5, 57054] , <<C1\_MS\_1>> 4700 Reflector Spec #1 MC=>BC=>MC[BP = 882.6, 67

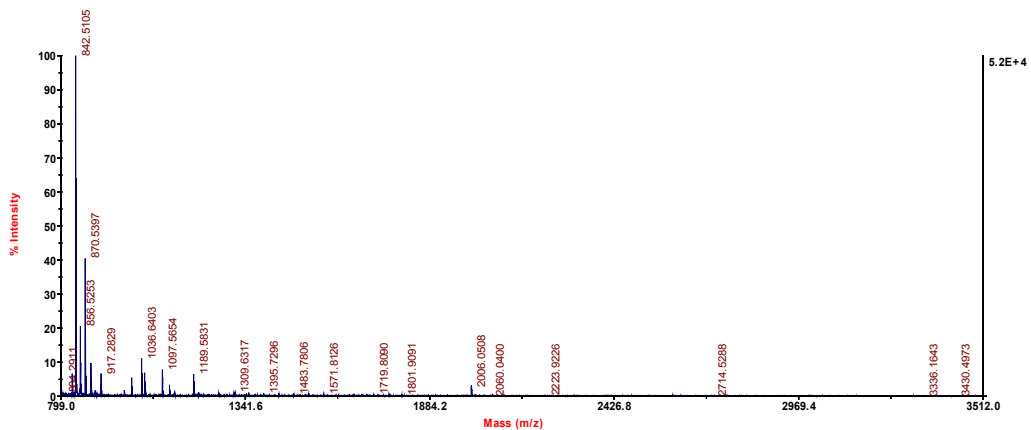

| Spot 141 (20080606-D11) Ube2n |           |        |       |     |                           |               |
|-------------------------------|-----------|--------|-------|-----|---------------------------|---------------|
| PMF/MALDI                     |           |        |       |     |                           |               |
| Calculated                    | Observed  | +/-ppm | start | end | Sequence                  |               |
| 886.5236                      | 887.5328  | 2      | 8     | 14  | R.IIKETQR.L               |               |
| 1035.6328                     | 1036.6403 | 0      | 15    | 24  | R.LLAEPVPGIK.A            |               |
| 2005.048                      | 2006.0508 | -2     | 15    | 33  | R.LLAEPVPGIKAEPPDESNA.R.Y |               |
| 1746.8902                     | 1747.9059 | 5      | 54    | 68  | K.LELFLPEEYPMAAPK.V       |               |
| 1762.8951                     | 1763.8965 | 2      | 54    | 68  | K.LELFLPEEYPMAAPK.V       |               |
| 984.5029                      | 985.5074  | -3     | 75    | 82  | K.IYHPNVDK.L              | Oxidation (M) |
| 1310.7095                     | 1311.6727 | -34    | 75    | 85  | K.IYHPNVDKLR.I            |               |
| 1188.5734                     | 1189.5831 | 2      | 131   | 141 | K.SNEAQAIETAR.A           |               |

**Spot 142 (A17 20080606) - mixture of: Protein disulfide-isomerase A6 (Pdia6), Tubulin alpha-1A chain (Tuba1a), Tubulin alpha-1B (Tuba1b), Tubulin alpha-1C (Tuba1c), and Tubulin alpha-3 (Tuba3)**

SUB (4700 Reflector Spec #1 MC=>BC=>MC[BP = 842.5, 51390] , <<A1\_MS\_1>> 4700 Reflector Spec #1 MC=>BC=>MC[BP = 882.6, 21

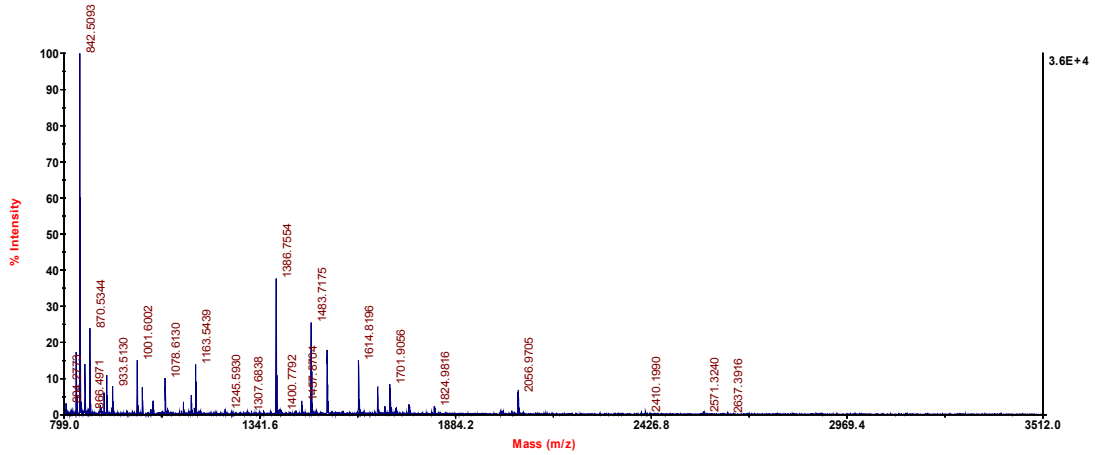

| Spot 142 (20080606-A17) Pdia6 |           |        |       |     |                           |           |                    |
|-------------------------------|-----------|--------|-------|-----|---------------------------|-----------|--------------------|
| MS•MS/MS                      |           |        |       |     |                           |           |                    |
| Calculated                    | Observed  | +/-ppm | start | end | Sequence                  | Ion Score | C.I.% Modification |
| 850.5219                      | 850.5365  | 17     | 367   | 373 | MKFALLK                   |           |                    |
| 866.5168                      | 866.516   | -1     | 367   | 373 | MKFALLK                   |           | Oxidation (M)      |
| 901.5141                      | 901.5116  | -3     | 61    | 67  | LTPEWKK                   |           |                    |
| 933.5112                      | 933.5127  | 2      | 257   | 264 | TRSDIVSR                  |           |                    |
| 1001.5989                     | 1001.6018 | 3      | 68    | 77  | AASALKDVVK                | 42        | 99.992             |
| 1001.5989                     | 1001.6018 | 3      | 68    | 77  | AASALKDVVK                |           |                    |
| 1078.6143                     | 1078.6139 | 0      | 314   | 322 | NSYLEVLLK                 | 31        | 99.907             |
| 1078.6143                     | 1078.6139 | 0      | 314   | 322 | NSYLEVLLK                 |           |                    |
| 1123.651                      | 1123.6462 | -4     | 232   | 241 | YGKGFPTIK                 |           |                    |
| 1151.4963                     | 1151.4963 | 0      | 246   | 256 | GESPVDYDGGR               |           |                    |
| 1163.5439                     | 1163.5427 | -1     | 109   | 118 | NKPEDYGGGR                |           |                    |
| 1163.5439                     | 1163.5427 | -1     | 109   | 118 | NKPEDYGGGR                | 64        | 100                |
| 1386.7587                     | 1386.756  | -2     | 119   | 132 | TGEAVDAALSALR             | 76        | 100                |
| 1386.7587                     | 1386.756  | -2     | 119   | 132 | TGEAVDAALSALR             |           |                    |
| 1483.7175                     | 1483.7181 | 0      | 374   | 386 | GSFSEGGINEFLR             | 49        | 99.998             |
| 1483.7175                     | 1483.7181 | 0      | 374   | 386 | GSFSEGGINEFLR             |           |                    |
| 1527.8469                     | 1527.8445 | -3     | 217   | 231 | LAAVDATVNGVLASR           | 43        | 99.994             |
| 1527.8469                     | 1527.8445 | -3     | 217   | 231 | LAAVDATVNGVLASR           |           |                    |
| 1614.8234                     | 1614.8203 | -2     | 393   | 409 | GSTAPVGGGFFNITPR          |           |                    |
| 1614.8234                     | 1614.8203 | -2     | 393   | 409 | GSTAPVGGGFFNITPR          | 34        | 99.943             |
| 1667.8024                     | 1667.8011 | -1     | 242   | 256 | IFQKGSPVDYDGGR            | 38        | 99.979             |
| 1667.8024                     | 1667.8011 | -1     | 242   | 256 | IFQKGSPVDYDGGR            |           |                    |
| 1755.0123                     | 1755.0106 | -1     | 215   | 231 | VKLAAVDATVNGVLASR         |           |                    |
| 2015.0079                     | 2014.9926 | -8     | 195   | 212 | NLEPEWAAAATEVKEQTK        |           |                    |
| 2571.3313                     | 2571.3171 | -6     | 78    | 102 | VGAVNADKHQSLGGQYGVQGFPTIK |           |                    |
| 2637.3657                     | 2637.4011 | 13     | 265   | 288 | ALDLFSDNAPPELLEIINEDIAK   |           |                    |

| Spot 142 (20080606-A17) Pdia6 |           |        |       |     |                               |           |                    |
|-------------------------------|-----------|--------|-------|-----|-------------------------------|-----------|--------------------|
| PMF/MALDI                     |           |        |       |     |                               |           |                    |
| Calculated                    | Observed  | +/-ppm | start | end | Sequence                      | Ion Score | C.I.% Modification |
| 900.5069                      | 901.5107  | -4     | 61    | 67  | R.LTPEWKK.A                   |           |                    |
| 1000.5917                     | 1001.6002 | -1     | 68    | 77  | K.AASALKDVVK.V                |           |                    |
| 2570.3242                     | 2571.324  | -3     | 78    | 102 | K.VGAVNADKHQSLGGQYGVQGFPTIK.I |           |                    |
| 1815.9268                     | 1816.9316 | -1     | 86    | 102 | K.HQSLGGQYGVQGFPTIK.I         |           |                    |
| 1162.6367                     | 1163.5439 | 0      | 109   | 118 | K.NKPEDYGGGR.T                |           |                    |
| 1386.7514                     | 1386.7554 | -2     | 119   | 132 | R.TGEAVDAALSALR.Q             |           |                    |
| 2014.0007                     | 2014.9895 | -9     | 195   | 212 | K.NLEPEWAAAATEVKEQTK.G        |           |                    |
| 1754.005                      | 1755.009  | -2     | 215   | 231 | K.VKLAAVDATVNGVLASR.Y         |           |                    |
| 1526.8416                     | 1527.8455 | -2     | 217   | 231 | K.LAAVDATVNGVLASR.Y           |           |                    |
| 1666.7951                     | 1667.8004 | -1     | 242   | 256 | K.IFQKGSPVDYDGGR.T            |           |                    |
| 1150.4891                     | 1151.496  | 0      | 246   | 256 | K.GESPVDYDGGR.T               |           |                    |
| 932.5039                      | 933.513   | 2      | 257   | 264 | R.TRSDIVSR.A                  |           |                    |
| 2636.3585                     | 2637.3916 | 10     | 265   | 288 | R.ALDLFSDNAPPELLEIINEDIAK.K   |           |                    |
| 1077.607                      | 1078.613  | -1     | 314   | 322 | R.NSYLEVLLK.L                 |           |                    |
| 865.5095                      | 866.4971  | -23    | 367   | 373 | K.MKFALLK.G                   |           | Oxidation (M)      |
| 1482.7103                     | 1483.7175 | 0      | 374   | 386 | K.GSFSEGGINEFLR.E             |           |                    |
| 1613.8162                     | 1614.8196 | -2     | 393   | 409 | R.GSTAPVGGGFFNITPR.E          |           |                    |

| Spot 142 (20070719-D9) Pdia6 |           |        |       |     |                           |           |        |              |  |
|------------------------------|-----------|--------|-------|-----|---------------------------|-----------|--------|--------------|--|
| MS•MS/MS                     |           |        |       |     |                           |           |        |              |  |
| Calculated                   | Observed  | +/-ppm | start | end | Sequence                  | Ion Score | C.I. % | Modification |  |
| 901.5141                     | 901.512   | -2     | 61    | 67  | LTPEWKK                   |           |        |              |  |
| 933.5112                     | 933.508   | -3     | 257   | 264 | TRSDIVSR                  |           |        |              |  |
| 1001.5989                    | 1001.588  | -11    | 68    | 77  | AASALKDVVK                |           |        |              |  |
| 1078.6143                    | 1078.6113 | -3     | 314   | 322 | NSYLEVLLK                 |           |        |              |  |
| 1123.651                     | 1123.6239 | -24    | 232   | 241 | YGKGFPTIK                 |           |        |              |  |
| 1151.4963                    | 1151.4943 | -2     | 246   | 256 | GESPVYDGGGR               |           |        |              |  |
| 1163.5439                    | 1163.5404 | -3     | 109   | 118 | NKPEDYGGGR                | 29        | 99.856 |              |  |
| 1163.5439                    | 1163.5404 | -3     | 109   | 118 | NKPEDYGGGR                |           |        |              |  |
| 1386.7587                    | 1386.7555 | -2     | 119   | 132 | TGEAVDAALSALR             |           |        |              |  |
| 1386.7587                    | 1386.7555 | -2     | 119   | 132 | TGEAVDAALSALR             | 19        | 98.545 |              |  |
| 1483.7175                    | 1483.7114 | -4     | 374   | 386 | GSFSEGGINEFLR             |           |        |              |  |
| 1483.7175                    | 1483.7114 | -4     | 374   | 386 | GSFSEGGINEFLR             | 37        | 99.978 |              |  |
| 1527.8489                    | 1527.8403 | -6     | 217   | 231 | LAAVDATVNGVLASR           | 2         | 31.314 |              |  |
| 1527.8489                    | 1527.8403 | -6     | 217   | 231 | LAAVDATVNGVLASR           |           |        |              |  |
| 1528.7642                    | 1528.7372 | -22    | 195   | 208 | NLEPEWAAAATEVK            |           |        |              |  |
| 1614.8234                    | 1614.8156 | -5     | 393   | 409 | GSTAPVGGGSPFNITPR         |           |        |              |  |
| 1614.8234                    | 1614.8156 | -5     | 393   | 409 | GSTAPVGGGSPFNITPR         | 46        | 99.997 |              |  |
| 1667.8024                    | 1667.7954 | -4     | 242   | 256 | IFQKGESPVYDGGGR           |           |        |              |  |
| 1667.8024                    | 1667.7954 | -4     | 242   | 256 | IFQKGESPVYDGGGR           | 77        | 100    |              |  |
| 1793.8928                    | 1793.8906 | -1     | 103   | 118 | IFGANKNKPEDYQGGGR         |           |        |              |  |
| 1816.9341                    | 1816.9204 | -8     | 86    | 102 | HQSLGGQYGVQGFPTIK         |           |        |              |  |
| 2015.0079                    | 2015.0028 | -3     | 195   | 212 | NLEPEWAAAATEVKEQTK        |           |        |              |  |
| 2015.0079                    | 2015.0028 | -3     | 195   | 212 | NLEPEWAAAATEVKEQTK        | 88        | 100    |              |  |
| 2200.1243                    | 2200.1133 | -5     | 195   | 214 | NLEPEWAAAATEVKEQTKGK      |           |        |              |  |
| 2571.3313                    | 2571.3267 | -2     | 78    | 102 | VGAVNADKHQSLGGQYGVQGFPTIK |           |        |              |  |
| 2571.3313                    | 2571.3267 | -2     | 78    | 102 | VGAVNADKHQSLGGQYGVQGFPTIK | 2         | 35.157 |              |  |

| Spot 142 (20070719-D9) Pdia6 |           |        |       |     |                               |           |        |              |  |
|------------------------------|-----------|--------|-------|-----|-------------------------------|-----------|--------|--------------|--|
| PMF/MALDI                    |           |        |       |     |                               |           |        |              |  |
| Calculated                   | Observed  | +/-ppm | start | end | Sequence                      | Ion Score | C.I. % | Modification |  |
| 900.5069                     | 901.5105  | -4     | 61    | 67  | RLTPEWKK.A                    |           |        |              |  |
| 1000.5917                    | 1001.5968 | -12    | 68    | 77  | K.AASALKDVVK.V                |           |        |              |  |
| 2570.3242                    | 2571.335  | 1      | 78    | 102 | K.VGAVNADKHQSLGGQYGVQGFPTIK.I |           |        |              |  |
| 1815.9268                    | 1816.9236 | -6     | 86    | 102 | K.HQSLGGQYGVQGFPTIK.I         |           |        |              |  |
| 1792.8856                    | 1793.8934 | 0      | 103   | 118 | K.IFGANKNKPEDYQGGGR.T         |           |        |              |  |
| 1162.5367                    | 1163.542  | -2     | 109   | 118 | K.NKPEDYQGGGR.T               |           |        |              |  |
| 1385.7514                    | 1386.7562 | -2     | 119   | 132 | R.TGEAVDAALSALR.G             |           |        |              |  |
| 1527.7569                    | 1528.8004 | 24     | 195   | 208 | K.NLEPEWAAAATEVKE             |           |        |              |  |
| 2014.0007                    | 2015.0076 | 0      | 195   | 212 | K.NLEPEWAAAATEVKEQTK.G        |           |        |              |  |
| 1526.8416                    | 1527.842  | -5     | 217   | 231 | K.LAAVDATVNGVLASR.Y           |           |        |              |  |
| 1122.6437                    | 1123.6227 | -25    | 232   | 241 | R.YGKGFPTIK.I                 |           |        |              |  |
| 1666.7951                    | 1667.8    | -1     | 242   | 256 | K.IFQKGESPVYDGGGR.T           |           |        |              |  |
| 1150.4891                    | 1151.4943 | -2     | 246   | 256 | K.GESPVYDGGGR.T               |           |        |              |  |
| 932.5039                     | 933.5059  | -6     | 257   | 264 | R.TRSDIVSR.A                  |           |        |              |  |
| 1077.607                     | 1078.6105 | -4     | 314   | 322 | R.NSYLEVLLK.L                 |           |        |              |  |
| 849.5146                     | 850.5498  | 33     | 367   | 373 | K.MKFAALLK.G                  |           |        |              |  |
| 1482.7103                    | 1483.7151 | -2     | 374   | 386 | K.GSFSEGGINEFLR.E             |           |        |              |  |
| 1613.8162                    | 1614.8201 | -2     | 393   | 409 | R.GSTAPVGGGSPFNITPR.E         |           |        |              |  |
| 2326.1342                    | 2327.1636 | 9      | 393   | 415 | R.GSTAPVGGGSPFNITPREPWDGK.D   |           |        |              |  |

| Spot 142 (20080606-A17) Tuba1a |           |        |       |     |                      |           |        |               |  |
|--------------------------------|-----------|--------|-------|-----|----------------------|-----------|--------|---------------|--|
| MS•MS/MS                       |           |        |       |     |                      |           |        |               |  |
| Calculated                     | Observed  | +/-ppm | start | end | Sequence             | Ion Score | C.I. % | Modification  |  |
| 909.504                        | 909.5071  | 3      | 157   | 164 | LSVDYGKK             |           |        |               |  |
| 909.504                        | 909.5071  | 3      | 157   | 164 | LSVDYGKK             | 14        | 94.592 |               |  |
| 1015.5782                      | 1015.5756 | -3     | 327   | 336 | DVNAAIATIK           | 27        | 99.751 |               |  |
| 1015.5782                      | 1015.5756 | -3     | 327   | 336 | DVNAAIATIK           |           |        |               |  |
| 1085.6201                      | 1085.6171 | -3     | 113   | 121 | EIDLVLDR             |           |        |               |  |
| 1396.693                       | 1396.7179 | 18     | 391   | 401 | LDHKFDLMIYAK         |           |        | Oxidation (M) |  |
| 1457.8685                      | 1457.8682 | 0      | 230   | 243 | LIGQIVSSITASLR       |           |        |               |  |
| 1701.9058                      | 1701.9041 | -1     | 65    | 79  | AVFVDLEPTVIDEVR      | 43        | 99.994 |               |  |
| 1701.9058                      | 1701.9041 | -1     | 65    | 79  | AVFVDLEPTVIDEVR      |           |        |               |  |
| 1718.8821                      | 1718.8796 | -1     | 216   | 229 | NLDIERPTYTNLNR       |           |        |               |  |
| 1756.9633                      | 1756.9662 | 13     | 265   | 280 | IHFPLATYAPVISAEEK    |           |        |               |  |
| 1824.9854                      | 1824.9821 | -2     | 353   | 370 | VGINYQPPTVPPGGDLAK   |           |        |               |  |
| 2007.8929                      | 2007.9025 | 5      | 41    | 60  | TIGGGDDSFNTFFSETGAGK |           |        |               |  |

| Spot 142 (20080606-A17) Tuba1a |           |        |       |     |                          |           |        |              |  |
|--------------------------------|-----------|--------|-------|-----|--------------------------|-----------|--------|--------------|--|
| PMF/MALDI                      |           |        |       |     |                          |           |        |              |  |
| Calculated                     | Observed  | +/-ppm | start | end | Sequence                 | Ion Score | C.I. % | Modification |  |
| 2006.8858                      | 2007.9072 | 7      | 41    | 60  | K.TIGGGDDSFNTFFSETGAGK.H |           |        |              |  |
| 1700.8985                      | 1701.9056 | 0      | 65    | 79  | R.AVFVDLEPTVIDEVR.T      |           |        |              |  |
| 1084.6128                      | 1085.6172 | -3     | 113   | 121 | K.EIDLVLDR.I             |           |        |              |  |
| 908.4967                       | 909.5056  | 2      | 157   | 164 | R.LSVDYGKK.S             |           |        |              |  |
| 1717.8747                      | 1718.8787 | -2     | 216   | 229 | R.NLDIERPTYTNLNR.L       |           |        |              |  |
| 1456.8613                      | 1457.8704 | 1      | 230   | 243 | R.LIGQIVSSITASLR.F       |           |        |              |  |
| 2408.2012                      | 2409.1812 | -11    | 244   | 264 | R.FDGNVLDLTFQTNLVPYPR.I  |           |        |              |  |
| 1755.9559                      | 1756.9847 | 12     | 265   | 280 | R.IHFPLATYAPVISAEEK.A    |           |        |              |  |
| 1014.5709                      | 1015.5756 | -3     | 327   | 336 | K.DVNAAIATIK.T           |           |        |              |  |
| 1823.9782                      | 1824.9816 | -2     | 353   | 370 | K.VGINYQPPTVPPGGDLAK.V   |           |        |              |  |

| Spot 142 (20080606-A17) Tuba1b |           |        |       |     |                      |           |        |               |  |
|--------------------------------|-----------|--------|-------|-----|----------------------|-----------|--------|---------------|--|
| MS•MS/MS                       |           |        |       |     |                      |           |        |               |  |
| Calculated                     | Observed  | +/-ppm | start | end | Sequence             | Ion Score | C.I.%  | Modification  |  |
| 909.504                        | 909.5071  | 3      | 157   | 164 | LSVDYGKK             |           |        |               |  |
| 909.504                        | 909.5071  | 3      | 157   | 164 | LSVDYGKK             | 14        | 94.592 |               |  |
| 1015.5782                      | 1015.5756 | -3     | 327   | 336 | DVNAAIATIK           | 27        | 99.751 |               |  |
| 1015.5782                      | 1015.5756 | -3     | 327   | 336 | DVNAAIATIK           |           |        |               |  |
| 1085.6201                      | 1085.6171 | -3     | 113   | 121 | EIDLVLDR             |           |        |               |  |
| 1396.693                       | 1396.7179 | 18     | 391   | 401 | LDHKFDLMYAK          |           |        | Oxidation (M) |  |
| 1701.9058                      | 1701.9041 | -1     | 65    | 79  | AVFVDLEPTVDEVR       | 43        | 99.994 |               |  |
| 1701.9058                      | 1701.9041 | -1     | 65    | 79  | AVFVDLEPTVDEVR       |           |        |               |  |
| 1718.8821                      | 1718.8796 | -1     | 216   | 229 | NLDIERPTYNLNR        |           |        |               |  |
| 1756.9633                      | 1756.9862 | 13     | 265   | 280 | IHFPLATYAPVISAEEK    |           |        |               |  |
| 1824.9854                      | 1824.9821 | -2     | 353   | 370 | VGINYPPTVPPGGDLAK    |           |        |               |  |
| 2007.8929                      | 2007.9025 | 5      | 41    | 60  | TIGGGDDSFNTFFSETGAGK |           |        |               |  |

| Spot 142 (20080606-A17) Tuba1b |           |        |       |     |                          |           |       |              |  |
|--------------------------------|-----------|--------|-------|-----|--------------------------|-----------|-------|--------------|--|
| PMF/MALDI                      |           |        |       |     |                          |           |       |              |  |
| Calculated                     | Observed  | +/-ppm | start | end | Sequence                 | Ion Score | C.I.% | Modification |  |
| 2006.8858                      | 2007.9072 | 7      | 41    | 60  | K.TIGGGDDSFNTFFSETGAGK.H |           |       |              |  |
| 1700.8985                      | 1701.9056 | 0      | 65    | 79  | R.AVFVDLEPTVDEVR.T       |           |       |              |  |
| 1084.6128                      | 1085.6172 | -3     | 113   | 121 | K.EIDLVLDR.I             |           |       |              |  |
| 908.4967                       | 909.5056  | 2      | 157   | 164 | R.LSVDYGKK.S             |           |       |              |  |
| 1717.8747                      | 1718.8787 | -2     | 216   | 229 | R.NLDIERPTYNLNR.L        |           |       |              |  |
| 1486.8719                      | 1487.8765 | -2     | 230   | 243 | R.LIGQIVSSITASLR.F       |           |       |              |  |
| 2408.2012                      | 2409.1812 | -11    | 244   | 264 | R.FDGALNVDLTFQTNLVPYPR.I |           |       |              |  |
| 1755.9559                      | 1756.9847 | 12     | 265   | 280 | R.IHFPLATYAPVISAEEK.A    |           |       |              |  |
| 1014.5709                      | 1015.5756 | -3     | 327   | 336 | K.DVNAAIATIK.T           |           |       |              |  |
| 1823.9782                      | 1824.9816 | -2     | 353   | 370 | K.VGINYPPTVPPGGDLAK.V    |           |       |              |  |

| Spot 142 (20080606-A17) Tuba1c |           |        |       |     |                      |           |        |               |  |
|--------------------------------|-----------|--------|-------|-----|----------------------|-----------|--------|---------------|--|
| MS•MS/MS                       |           |        |       |     |                      |           |        |               |  |
| Calculated                     | Observed  | +/-ppm | start | end | Sequence             | Ion Score | C.I.%  | Modification  |  |
| 909.504                        | 909.5071  | 3      | 157   | 164 | LSVDYGKK             |           |        |               |  |
| 909.504                        | 909.5071  | 3      | 157   | 164 | LSVDYGKK             | 14        | 94.592 |               |  |
| 1015.5782                      | 1015.5756 | -3     | 327   | 336 | DVNAAIATIK           | 27        | 99.751 |               |  |
| 1015.5782                      | 1015.5756 | -3     | 327   | 336 | DVNAAIATIK           |           |        |               |  |
| 1085.6201                      | 1085.6171 | -3     | 113   | 121 | EIDLVLDR             |           |        |               |  |
| 1396.693                       | 1396.7179 | 18     | 391   | 401 | LDHKFDLMYAK          |           |        | Oxidation (M) |  |
| 1701.9058                      | 1701.9041 | -1     | 65    | 79  | AVFVDLEPTVDEVR       | 43        | 99.994 |               |  |
| 1701.9058                      | 1701.9041 | -1     | 65    | 79  | AVFVDLEPTVDEVR       |           |        |               |  |
| 1718.8821                      | 1718.8796 | -1     | 216   | 229 | NLDIERPTYNLNR        |           |        |               |  |
| 1756.9633                      | 1756.9862 | 13     | 265   | 280 | IHFPLATYAPVISAEEK    |           |        |               |  |
| 2007.8929                      | 2007.9025 | 5      | 41    | 60  | TIGGGDDSFNTFFSETGAGK |           |        |               |  |

| Spot 142 (20080606-A17) Tuba1c |           |        |       |     |                          |           |       |              |  |
|--------------------------------|-----------|--------|-------|-----|--------------------------|-----------|-------|--------------|--|
| PMF/MALDI                      |           |        |       |     |                          |           |       |              |  |
| Calculated                     | Observed  | +/-ppm | start | end | Sequence                 | Ion Score | C.I.% | Modification |  |
| 2006.8858                      | 2007.9072 | 7      | 41    | 60  | K.TIGGGDDSFNTFFSETGAGK.H |           |       |              |  |
| 1700.8985                      | 1701.9056 | 0      | 65    | 79  | R.AVFVDLEPTVDEVR.T       |           |       |              |  |
| 1084.6128                      | 1085.6172 | -3     | 113   | 121 | K.EIDLVLDR.I             |           |       |              |  |
| 908.4967                       | 909.5056  | 2      | 157   | 164 | R.LSVDYGKK.S             |           |       |              |  |
| 1717.8747                      | 1718.8787 | -2     | 216   | 229 | R.NLDIERPTYNLNR.L        |           |       |              |  |
| 1486.8719                      | 1487.8765 | -2     | 230   | 243 | R.LIGQIVSSITASLR.F       |           |       |              |  |
| 2408.2012                      | 2409.1812 | -11    | 244   | 264 | R.FDGALNVDLTFQTNLVPYPR.I |           |       |              |  |
| 1755.9559                      | 1756.9847 | 12     | 265   | 280 | R.IHFPLATYAPVISAEEK.A    |           |       |              |  |
| 1014.5709                      | 1015.5756 | -3     | 327   | 336 | K.DVNAAIATIK.T           |           |       |              |  |

| Spot 142 (20080606-A17) Tuba3 |           |        |       |     |                      |           |        |               |  |
|-------------------------------|-----------|--------|-------|-----|----------------------|-----------|--------|---------------|--|
| MS•MS/MS                      |           |        |       |     |                      |           |        |               |  |
| Calculated                    | Observed  | +/-ppm | start | end | Sequence             | Ion Score | C.I.%  | Modification  |  |
| 909.504                       | 909.5071  | 3      | 157   | 164 | LSVDYGKK             |           |        |               |  |
| 909.504                       | 909.5071  | 3      | 157   | 164 | LSVDYGKK             | 14        | 94.592 |               |  |
| 1015.5782                     | 1015.5756 | -3     | 327   | 336 | DVNAAIATIK           | 27        | 99.751 |               |  |
| 1015.5782                     | 1015.5756 | -3     | 327   | 336 | DVNAAIATIK           |           |        |               |  |
| 1071.6045                     | 1071.6034 | -1     | 113   | 121 | EVDLVLDR             |           |        |               |  |
| 1396.693                      | 1396.7179 | 18     | 391   | 401 | LDHKFDLMYAK          |           |        | Oxidation (M) |  |
| 1457.8685                     | 1457.8682 | 0      | 230   | 243 | LIGQIVSSITASLR       |           |        |               |  |
| 1687.8901                     | 1687.8824 | -5     | 65    | 79  | AVFVDLEPTVDEVR       |           |        |               |  |
| 1718.8821                     | 1718.8796 | -1     | 216   | 229 | NLDIERPTYNLNR        |           |        |               |  |
| 1756.9633                     | 1756.9862 | 13     | 265   | 280 | IHFPLATYAPVISAEEK    |           |        |               |  |
| 1824.9854                     | 1824.9821 | -2     | 353   | 370 | VGINYPPTVPPGGDLAK    |           |        |               |  |
| 2007.8929                     | 2007.9025 | 5      | 41    | 60  | TIGGGDDSFNTFFSETGAGK |           |        |               |  |

| Spot 142 (20080606-A17) Tuba3 |           |        |       |     |                          |           |       |              |  |
|-------------------------------|-----------|--------|-------|-----|--------------------------|-----------|-------|--------------|--|
| PMF/MALDI                     |           |        |       |     |                          |           |       |              |  |
| Calculated                    | Observed  | +/-ppm | start | end | Sequence                 | Ion Score | C.I.% | Modification |  |
| 2006.8858                     | 2007.9072 | 7      | 41    | 60  | K.TIGGGDDSFNTFFSETGAGK.H |           |       |              |  |
| 1686.8829                     | 1687.8845 | -3     | 65    | 79  | R.AVFVDLEPTVDEVR.T       |           |       |              |  |
| 908.4967                      | 909.5056  | 2      | 157   | 164 | R.LSVDYGKK.S             |           |       |              |  |
| 1717.8747                     | 1718.8787 | -2     | 216   | 229 | R.NLDIERPTYNLNR.L        |           |       |              |  |
| 1456.8613                     | 1457.8704 | 1      | 230   | 243 | R.LIGQIVSSITASLR.F       |           |       |              |  |
| 2408.2012                     | 2409.1812 | -11    | 244   | 264 | R.FDGALNVDLTFQTNLVPYPR.I |           |       |              |  |
| 1755.9559                     | 1756.9847 | 12     | 265   | 280 | R.IHFPLATYAPVISAEEK.A    |           |       |              |  |
| 1014.5709                     | 1015.5756 | -3     | 327   | 336 | K.DVNAAIATIK.T           |           |       |              |  |
| 1823.9782                     | 1824.9816 | -2     | 353   | 370 | K.VGINYPPTVPPGGDLAK.V    |           |       |              |  |

# Spot 142 (D9 20070719) – Protein disulfide-isomerase A6 (Pdi6)

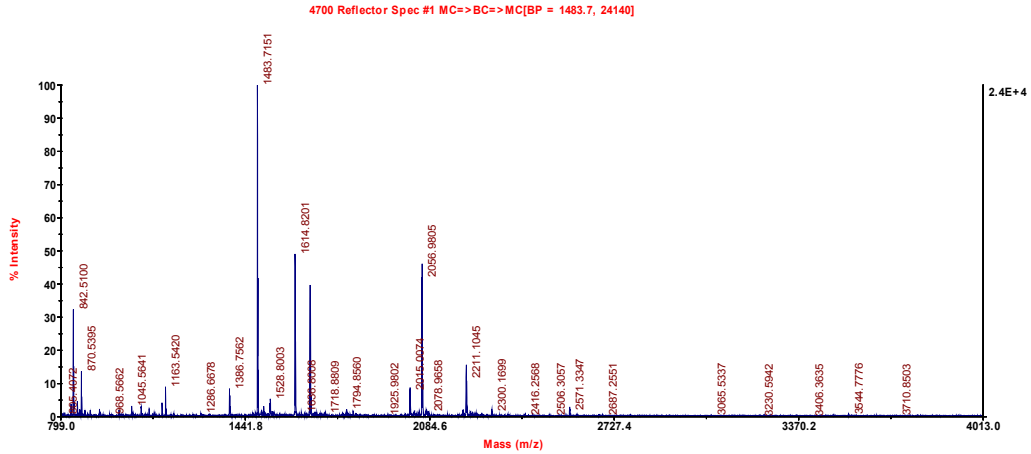

| Spot 142 (20070719.D9) Pdi6 |           |        |       |     |                           |        |
|-----------------------------|-----------|--------|-------|-----|---------------------------|--------|
| MS•MS/MS                    |           |        |       |     |                           |        |
| Calculated                  | Observed  | +/-ppm | start | end | Sequence                  |        |
| 901.5141                    | 901.512   | -2     | 61    | 67  | LTPEWKK                   |        |
| 933.5112                    | 933.508   | -3     | 257   | 264 | TRSDIVSR                  |        |
| 1001.5989                   | 1001.588  | -11    | 68    | 77  | AASALKDVVK                |        |
| 1078.6143                   | 1078.6113 | -3     | 314   | 322 | NSYLEVLLK                 |        |
| 1123.651                    | 1123.6239 | -24    | 232   | 241 | YGKGFPTIK                 |        |
| 1151.4963                   | 1151.4943 | -2     | 246   | 256 | GESPDYDGGRR               |        |
| 1163.5439                   | 1163.5404 | -3     | 109   | 118 | NKPEDYQGGRR               | 29     |
| 1163.5439                   | 1163.5404 | -3     | 109   | 118 | NKPEDYQGGRR               | 99.856 |
| 1386.7587                   | 1386.7555 | -2     | 119   | 132 | TGEAVDAALSALR             |        |
| 1386.7587                   | 1386.7555 | -2     | 119   | 132 | TGEAVDAALSALR             | 19     |
| 1483.7175                   | 1483.7114 | -4     | 374   | 386 | GSFSEGGINEFLR             |        |
| 1483.7175                   | 1483.7114 | -4     | 374   | 386 | GSFSEGGINEFLR             | 37     |
| 1527.8489                   | 1527.8403 | -6     | 217   | 231 | LAAVDATVNGVLASR           | 2      |
| 1527.8489                   | 1527.8403 | -6     | 217   | 231 | LAAVDATVNGVLASR           | 31.314 |
| 1528.7642                   | 1528.7972 | 22     | 195   | 208 | NLEPEWAAAATEVK            |        |
| 1614.8234                   | 1614.8156 | -5     | 393   | 409 | GSTAPVGGGSPFNITPR         | 46     |
| 1614.8234                   | 1614.8156 | -5     | 393   | 409 | GSTAPVGGGSPFNITPR         | 99.997 |
| 1667.8024                   | 1667.7954 | -4     | 242   | 256 | IFQKGSPVDYDGGRR           |        |
| 1667.8024                   | 1667.7954 | -4     | 242   | 256 | IFQKGSPVDYDGGRR           | 77     |
| 1793.8928                   | 1793.8906 | -1     | 103   | 118 | IFGANKNKPEDYQGGRR         |        |
| 1816.9341                   | 1816.9204 | -8     | 86    | 102 | HQSLGGQYGVQGFPTIK         |        |
| 2015.0079                   | 2015.0028 | -3     | 195   | 212 | NLEPEWAAAATEVK•EOTK       |        |
| 2015.0079                   | 2015.0028 | -3     | 195   | 212 | NLEPEWAAAATEVK•EOTK       | 88     |
| 2015.0079                   | 2015.0028 | -3     | 195   | 212 | NLEPEWAAAATEVK•EOTK       | 100    |
| 2200.1243                   | 2200.1133 | -5     | 195   | 214 | NLEPEWAAAATEVK•EOTK•GK    |        |
| 2571.3313                   | 2571.3267 | -2     | 78    | 102 | VGAVNADKHQSLGGQYGVQGFPTIK |        |
| 2571.3313                   | 2571.3267 | -2     | 78    | 102 | VGAVNADKHQSLGGQYGVQGFPTIK | 2      |
| 2571.3313                   | 2571.3267 | -2     | 78    | 102 | VGAVNADKHQSLGGQYGVQGFPTIK | 35.157 |

| Spot 142 (20070719.D9) Pdi6 |           |        |       |     |                               |  |
|-----------------------------|-----------|--------|-------|-----|-------------------------------|--|
| PMF/MALDI                   |           |        |       |     |                               |  |
| Calculated                  | Observed  | +/-ppm | start | end | Sequence                      |  |
| 900.5069                    | 901.5105  | -4     | 61    | 67  | R.LTPEWKK.A                   |  |
| 1000.5917                   | 1001.5868 | -12    | 68    | 77  | K.AASALKDVVK.V                |  |
| 2570.3242                   | 2571.335  | 1      | 78    | 102 | K.VGAVNADKHQSLGGQYGVQGFPTIK.I |  |
| 1915.9268                   | 1916.9236 | -6     | 86    | 102 | K.HQSLGGQYGVQGFPTIK.I         |  |
| 1792.8956                   | 1793.8934 | 0      | 103   | 118 | K.IFGANKNKPEDYQGGRR.T         |  |
| 1162.5367                   | 1163.542  | -2     | 109   | 118 | K.NKPEDYQGGRR.T               |  |
| 1385.7514                   | 1386.7562 | -2     | 119   | 132 | R.TGEAVDAALSALR.Q             |  |
| 1527.7569                   | 1528.8004 | 24     | 195   | 208 | K.NLEPEWAAAATEVK.E            |  |
| 2014.0007                   | 2015.0076 | 0      | 195   | 212 | K.NLEPEWAAAATEVK•EOTK.G       |  |
| 1526.8416                   | 1527.842  | -5     | 217   | 231 | K.LAAVDATVNGVLASR.Y           |  |
| 1122.6437                   | 1123.6227 | -25    | 232   | 241 | R.YGKGFPTIK.I                 |  |
| 1666.7951                   | 1667.8    | -1     | 242   | 256 | K.IFQKGSPVDYDGGRR.T           |  |
| 1150.4891                   | 1151.4943 | -2     | 246   | 256 | K.GESPDYDGGRR.T               |  |
| 932.5039                    | 933.5059  | -6     | 257   | 264 | R.TRSDIVSR.L                  |  |
| 1077.607                    | 1078.6105 | -4     | 314   | 322 | R.NSYLEVLLK.L                 |  |
| 849.5146                    | 850.5498  | 33     | 367   | 373 | K.MK•FALLK.G                  |  |
| 1482.7103                   | 1483.7151 | -2     | 374   | 386 | K.GSFSEGGINEFLR.E             |  |
| 1613.8162                   | 1614.8201 | -2     | 393   | 409 | R.GSTAPVGGGSPFNITPR.E         |  |
| 2326.1342                   | 2327.1636 | 9      | 393   | 415 | R.GSTAPVGGGSPFNITPREP•WDGK.D  |  |

## Spot 145 (P1014-15) – Aldose reductase (Akr1b1)

| Spot 145 (P1014-15) Akr1b1 |         |                                                                |                         |                   |                      |                      |               |                 |                           |              |                     |
|----------------------------|---------|----------------------------------------------------------------|-------------------------|-------------------|----------------------|----------------------|---------------|-----------------|---------------------------|--------------|---------------------|
| LCMS/MS (Scaffold)         |         |                                                                |                         |                   |                      |                      |               |                 |                           |              |                     |
| Sample Name                | Acc No. | Protein(s) inferred                                            | No. Peptides identified | Sequence Coverage | Position in sequence | Peptide Sequence     | Precursor m/z | Charge observed | Calculated mass (neutral) | Mascot score | Mascot Expect value |
| P1014-15                   | P07943  | sp P07943 Aldose reductase<br>Tax_id=10116 [Rattus norvegicus] | 1                       | 4.43%             | 156 - 169            | (K)AIGVSNFNPLGIER(I) | 779.20        | 2               | 1556.38                   | 55.5         | 8.30E-003           |

# Spot 148 (E14 20070719) – Ferritin light chain 1 (Ftl1)

SUB (4700 Reflector Spec #1 MC=>BC=>MC[BP = 842.5, 11141] , <<E15\_MS\_1>> 4700 Reflector Spec #1 MC=>BC=>MC[BP = 842.5, 8

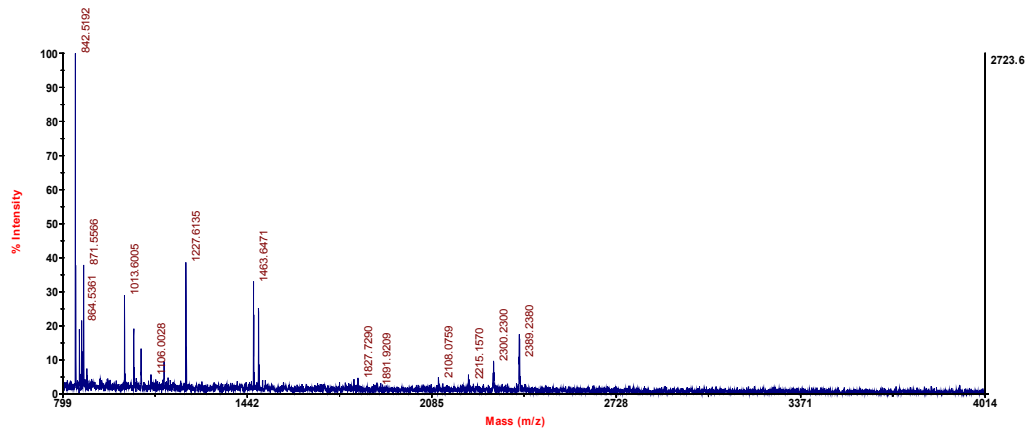

| Spot 148 (20070719-E14) Ftl1 |           |        |       |     |                             |                    |
|------------------------------|-----------|--------|-------|-----|-----------------------------|--------------------|
| PMF/MALDI                    |           |        |       |     |                             |                    |
| Calculated                   | Observed  | +/-ppm | start | end | Sequence                    |                    |
| 1479.6954                    | 1480.6689 | -23    | 7     | 19  | R.QNYSVEEAAVNR.L            | Ion Score          |
| 883.5341                     | 864.5361  | -6     | 20    | 26  | R.LVNLHLR.A                 | C.I.% Modification |
| 1012.6029                    | 1013.6005 | -10    | 66    | 73  | R.LLKLGNER.G                |                    |
| 1070.5291                    | 1071.5176 | -18    | 145   | 153 | K.MGNHLTLR.R                | Oxidation (M)      |
| 1226.6302                    | 1227.6135 | -20    | 145   | 154 | K.MGNHLTLRR.V               | Oxidation (M)      |
| 2388.2074                    | 2389.238  | 10     | 155   | 177 | R.VAGPQPAQTGVAQASLGEYLFER.L |                    |

**Spot 150 (C6 20080606) – mixture of: rCG61762, isoform CRA\_f (similar to: Splicing factor, arginine/serine-rich 7) (rCG61762) and Splicing factor, arginine/serine-rich 7 (Sfrs7)**

SUB (4700 Reflector Spec #1 MC=>BC=>MC[BP = 1073.6, 24552] , <<C1\_MS\_1>> 4700 Reflector Spec #1 MC=>BC=>MC[BP = 882.6, 6

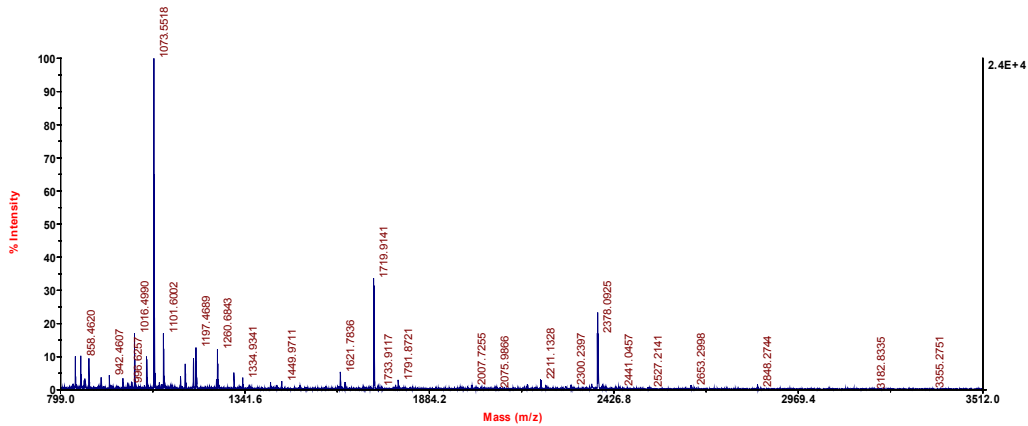

| Spot 150 (20080606.C6) rCG61762 |           |        |       |     |                                |           |                    |
|---------------------------------|-----------|--------|-------|-----|--------------------------------|-----------|--------------------|
| PMF/MALDI                       |           |        |       |     |                                |           |                    |
| Calculated                      | Observed  | +/-ppm | start | end | Sequence                       | Ion Score | C.I.% Modification |
| 2354.1866                       | 2355.1855 | -4     | 7     | 29  | R.YGGETKVYYGNLGTGAGKGELER.A    |           |                    |
| 1718.8951                       | 1719.9141 | 7      | 13    | 29  | K.VYVGNLGTGAGKGELER.A          |           |                    |
| 1072.5342                       | 1073.5516 | 10     | 30    | 38  | R.AFSYYGLR.T                   |           |                    |
| 1620.7573                       | 1621.7834 | 12     | 45    | 58  | R.NPPGFAFVEFEDPR.D             |           |                    |
| 2377.0975                       | 2378.0925 | -5     | 45    | 65  | R.NPPGFAFVEFEDPRDAEDAVR.G      |           |                    |
| 2847.3464                       | 2848.2744 | -28    | 45    | 70  | R.NPPGFAFVEFEDPRDAEDAVRGLDGK.V |           |                    |
| 1259.8656                       | 1260.6842 | 9      | 77    | 87  | R.VRVELSTGMPPR.R               |           | Oxidation (M)      |
| 1415.7667                       | 1416.7821 | 6      | 77    | 88  | R.VRVELSTGMPPR.S               |           | Oxidation (M)      |
| 1256.685                        | 1257.7036 | 9      | 88    | 97  | R.SRFDRPPAR.R                  |           |                    |
| 1100.5839                       | 1101.6002 | 8      | 89    | 97  | R.SRFDRPPAR.R                  |           |                    |
| 857.4508                        | 858.462   | 5      | 91    | 97  | R.FDRPPAR.R                    |           |                    |
| 1015.4835                       | 1016.499  | 8      | 98    | 105 | R.RPFPNDR.C                    |           |                    |
| 941.4903                        | 942.4607  | -39    | 134   | 141 | R.SHSRSRGR.R                   |           |                    |

| Spot 150 (20080606.C6) Sfrs7 |           |        |       |     |                                |           |                    |
|------------------------------|-----------|--------|-------|-----|--------------------------------|-----------|--------------------|
| PMF/MALDI                    |           |        |       |     |                                |           |                    |
| Calculated                   | Observed  | +/-ppm | start | end | Sequence                       | Ion Score | C.I.% Modification |
| 2354.1866                    | 2355.1855 | -4     | 7     | 29  | R.YGGETKVYYGNLGTGAGKGELER.A    |           |                    |
| 1718.8951                    | 1719.9141 | 7      | 13    | 29  | K.VYVGNLGTGAGKGELER.A          |           |                    |
| 1072.5342                    | 1073.5516 | 10     | 30    | 38  | R.AFSYYGLR.T                   |           |                    |
| 1620.7573                    | 1621.7834 | 12     | 45    | 58  | R.NPPGFAFVEFEDPR.D             |           |                    |
| 2377.0975                    | 2378.0925 | -5     | 45    | 65  | R.NPPGFAFVEFEDPRDAEDAVR.G      |           |                    |
| 2847.3464                    | 2848.2744 | -28    | 45    | 70  | R.NPPGFAFVEFEDPRDAEDAVRGLDGK.V |           |                    |
| 1259.8656                    | 1260.6842 | 9      | 77    | 87  | R.VRVELSTGMPPR.R               |           | Oxidation (M)      |
| 1415.7667                    | 1416.7821 | 6      | 77    | 88  | R.VRVELSTGMPPR.S               |           | Oxidation (M)      |
| 1256.685                     | 1257.7036 | 9      | 88    | 97  | R.SRFDRPPAR.R                  |           |                    |
| 1100.5839                    | 1101.6002 | 8      | 89    | 97  | R.SRFDRPPAR.R                  |           |                    |
| 857.4508                     | 858.462   | 5      | 91    | 97  | R.FDRPPAR.R                    |           |                    |
| 1015.4835                    | 1016.499  | 8      | 98    | 105 | R.RPFPNDR.C                    |           |                    |



# Spot 154 (D12 20080606) - RuvB-like 1 (Ruvb1)

SUB (4700 Reflector Spec #1 MC=>BC=>MC[BP = 882.6, 7494] , <<C1\_MS\_1>> 4700 Reflector Spec #1 MC=>BC=>MC[BP = 882.6, 673

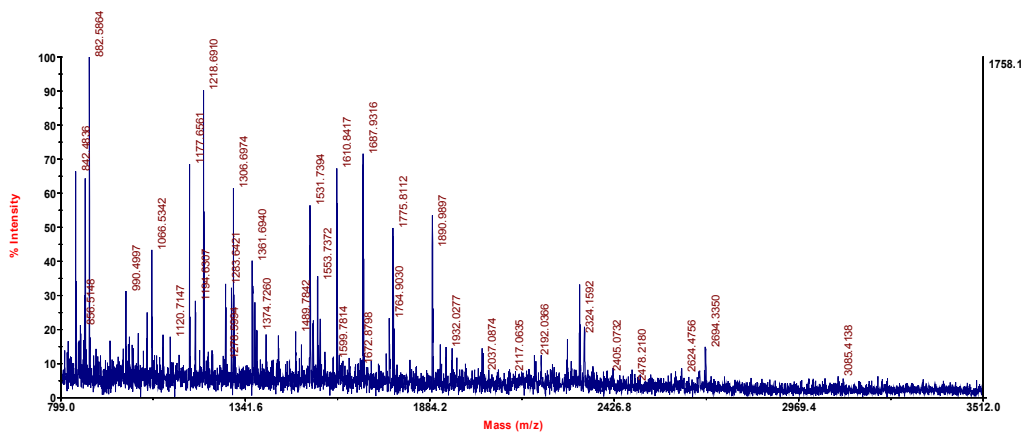

| Spot 154 (20080606-D12) Ruvb1 |           |        |       |     |                           |                 |
|-------------------------------|-----------|--------|-------|-----|---------------------------|-----------------|
| PMF/MALDI                     |           |        |       |     |                           |                 |
| Calculated                    | Observed  | +/-ppm | start | end | Sequence                  |                 |
| 1299.6531                     | 1300.667  | 5      | 34    | 46  | K.QAASGLVGOENAR.E         |                 |
| 1437.7398                     | 1438.7488 | 1      | 108   | 118 | K.KTEVLNENFRR.A           |                 |
| 1931.0728                     | 1932.0277 | -27    | 166   | 182 | K.GTKQLKLDPSIFSLQK.E      |                 |
| 1930.0523                     | 1931.032  | -14    | 169   | 184 | K.QLKLDPSIFSLQKER.V       |                 |
| 1560.8147                     | 1561.8115 | -7     | 172   | 184 | K.LDPSIFSLQKER.V          |                 |
| 1733.8836                     | 1734.913  | 13     | 185   | 201 | R.VEAGDVIVIEANSQAVK.R     |                 |
| 1889.9647                     | 1890.9897 | -1     | 185   | 202 | R.VEAGDVIVIEANSQAVK.Q     |                 |
| 1686.9304                     | 1687.9316 | -4     | 318   | 333 | R.ALESSIPIVIFASN.R.G      |                 |
| 1947.9902                     | 1948.9852 | -6     | 340   | 357 | R.GTEDITSPHGIPLDLLDR.V    |                 |
| 1754.8947                     | 1755.8873 | -8     | 363   | 376 | R.TMLYTPQEMKQIIK.I        | 2 Oxidation (M) |
| 2323.1655                     | 2324.1592 | -6     | 379   | 400 | R.AQTEGINISEALNHLGEIGTK.T |                 |
| 1367.6755                     | 1368.6757 | -5     | 446   | 456 | K.LIADGQDKYMK.-           | Oxidation (M)   |

## Spot 160 (C7 20080606) – Thimet oligopeptidase (Thop1) and/or Probable ATP-dependent RNA helicase DDX4 (Ddx4)

SUB (4700 Reflector Spec #1 MC=>BC=>MC[BP = 882.6, 7593] , <<C1\_MS\_1>> 4700 Reflector Spec #1 MC=>BC=>MC[BP = 882.6, 673

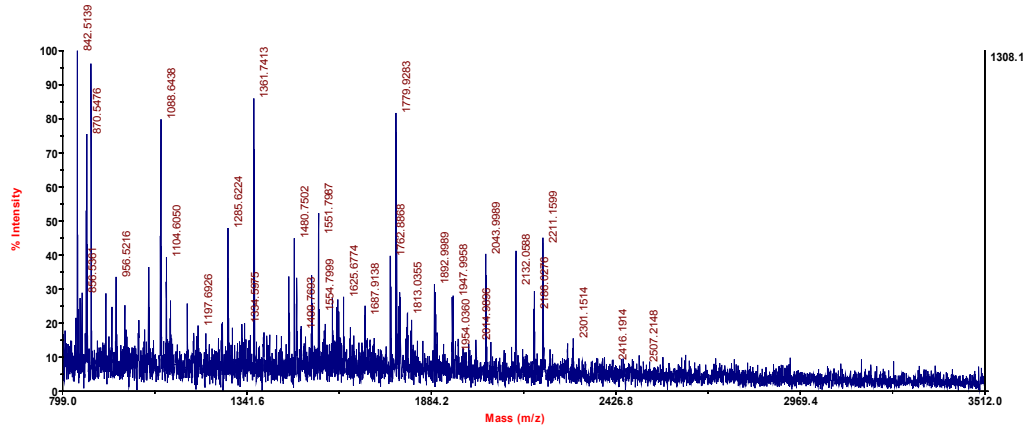

| Spot 160 (20080606-C7) Thop1 |           |        |       |     |                        |               |
|------------------------------|-----------|--------|-------|-----|------------------------|---------------|
| PMF/MALDI                    |           |        |       |     |                        |               |
| Calculated                   | Observed  | +/-ppm | start | end | Sequence               |               |
| 1115.5723                    | 1116.5919 | 11     | 26    | 34  | R.WDLSAQGIR.A          |               |
| 1786.8261                    | 1787.8387 | 3      | 51    | 66  | R.VGAQDFEDVSYESTLK.A   |               |
| 1463.762                     | 1464.7814 | 8      | 67    | 79  | K.ALADVEVYTVQR.N       |               |
| 1891.9904                    | 1892.9989 | 1      | 80    | 95  | R.NILDFQGHVSPNKDIR.A   |               |
| 1486.6796                    | 1487.7109 | 16     | 104   | 115 | K.KLSEFDVEMSMR.Q       | Oxidation (M) |
| 1550.794                     | 1551.7987 | -2     | 267   | 300 | K.TSQTVATFLDELAR.K     |               |
| 1678.889                     | 1679.8962 | 0      | 267   | 301 | K.TSQTVATFLDELARK.L    |               |
| 1196.6877                    | 1197.6926 | -2     | 301   | 310 | R.KLKPLGQER.A          |               |
| 1284.6173                    | 1285.6224 | -2     | 358   | 367 | K.EYFPMQVYTR.G         | Oxidation (M) |
| 2042.9949                    | 2043.9989 | -2     | 401   | 418 | R.DAASGEEIGKLYLDLYPR.E |               |
| 1095.5546                    | 1096.5762 | 13     | 411   | 418 | K.FYLDLYPR.E           |               |
| 1345.7215                    | 1346.7361 | 5      | 542   | 553 | K.SRQANAGLFNLR.Q       |               |
| 1102.5883                    | 1103.5961 | 0      | 544   | 553 | R.QANAGLFNLR.Q         |               |
| 2185.0267                    | 2186.0276 | -4     | 560   | 578 | K.VDQVLTQTVDPAEEYAR.L  |               |
| 1761.8931                    | 1762.8868 | -8     | 643   | 659 | R.TSILRPGGSEDASTMLK.Q  |               |
| 1777.868                     | 1778.9191 | 13     | 643   | 659 | R.TSILRPGGSEDASTMLK.Q  | Oxidation (M) |

| Spot 160 (20080606-C7) Ddx4 |           |        |       |     |                          |               |
|-----------------------------|-----------|--------|-------|-----|--------------------------|---------------|
| PMF/MALDI                   |           |        |       |     |                          |               |
| Calculated                  | Observed  | +/-ppm | start | end | Sequence                 |               |
| 1960.8955                   | 1961.9379 | 18     | 97    | 113 | R.GFLNNKFEEDSSGFWK.E     |               |
| 1624.6754                   | 1625.6774 | -3     | 133   | 148 | R.GGYPDGNDSEASGPFR.R     |               |
| 1607.8155                   | 1608.7781 | -28    | 194   | 209 | R.GAYKGLNEEVYTGSGK.N     |               |
| 1087.639                    | 1088.6438 | -2     | 302   | 311 | K.YSIPIVLAGR.D           |               |
| 2300.2133                   | 2301.1514 | -30    | 324   | 344 | K.TAAFLLPILAHMRDGITASR.F | Oxidation (M) |
| 1360.735                    | 1361.7413 | -1     | 361   | 371 | R.ELINQIYLEAR.K          |               |
| 1603.8471                   | 1604.8655 | 7      | 381   | 395 | R.AVVIYGGTQFGHSIR.Q      |               |
| 1778.9203                   | 1779.9283 | 0      | 461   | 475 | R.QTLFSAITFPPEIQR.L      |               |
| 869.5698                    | 870.5476  | -34    | 515   | 521 | R.KLVEILR.N              |               |
| 1761.9063                   | 1762.8868 | -16    | 522   | 536 | R.NIGDERPMVYFVETKK.K     |               |
| 1777.9033                   | 1778.9191 | 5      | 522   | 536 | R.NIGDERPMVYFVETKK.K     | Oxidation (M) |
| 1085.5465                   | 1086.5762 | 21     | 550   | 559 | K.ISTTSIHGDR.E           |               |
| 1498.7468                   | 1499.7693 | 9      | 550   | 562 | K.ISTTSIHGDR.E           |               |
| 2131.0596                   | 2132.0598 | -3     | 625   | 643 | R.AISFFDTESDNHLAQPLVK.V  |               |

**Spot 162 (B6 20080606) – mixture of: ATP synthase subunit beta, mitochondrial precursor (Atp5b), ATP synthase beta subunit (Atp5b), Tubulin beta-5 chain (Tubb5), Tubulin beta-2C chain (Tubb2c), Tubulin beta-3 chain (Tubb3), Tubulin beta-2A chain (Tubb2a) and Tubulin beta-2B chain (Tubb2b)**

SUB [4700 Reflector Spec #1 MC=>BC=>MC]BP = 842.5, 41270] , <<A1\_MS\_1>> 4700 Reflector Spec #1 MC=>BC=>MC]BP = 882.6, 21

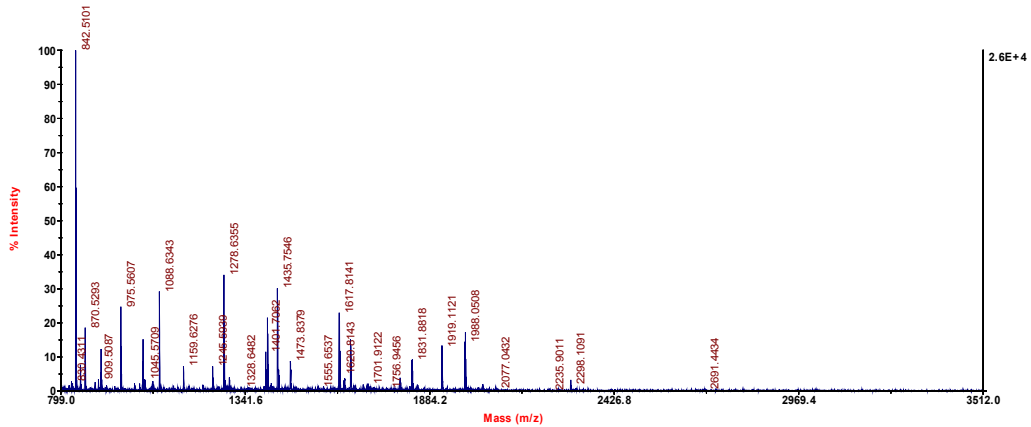

| Spot 162 (20080606-B6) Atp5b (precursor) |           |        |       |     |                       |           |        |                 |  |
|------------------------------------------|-----------|--------|-------|-----|-----------------------|-----------|--------|-----------------|--|
| MS•MS/MS                                 |           |        |       |     |                       |           |        |                 |  |
| Calculated                               | Observed  | +/-ppm | start | end | Sequence              | Ion Score | C.I. % | Modification    |  |
| 975.5621                                 | 975.562   | 0      | 202   | 212 | IGLFGGAGVGK           |           |        |                 |  |
| 975.5621                                 | 975.562   | 0      | 202   | 212 | IGLFGGAGVGK           | 73        | 100    |                 |  |
| 1038.5942                                | 1038.5979 | 4      | 134   | 143 | IPVGPETLGR            |           |        |                 |  |
| 1040.6714                                | 1040.667  | -4     | 481   | 489 | LVPLKETIK             |           |        |                 |  |
| 1040.6714                                | 1040.667  | -4     | 481   | 489 | LVPLKETIK             | 18        | 98.277 |                 |  |
| 1088.635                                 | 1088.6351 | 0      | 189   | 198 | VVDLLAPYAK            | 45        | 99.997 |                 |  |
| 1088.635                                 | 1088.6351 | 0      | 189   | 198 | VVDLLAPYAK            |           |        |                 |  |
| 1217.7                                   | 1217.6989 | -1     | 199   | 212 | GKIGLFGGAGVGK         |           |        |                 |  |
| 1278.6359                                | 1278.6357 | 0      | 110   | 121 | TIAMDGTEGLVR          |           |        | Oxidation (M)   |  |
| 1278.6359                                | 1278.6357 | 0      | 110   | 121 | TIAMDGTEGLVR          | 16        | 97.06  | Oxidation (M)   |  |
| 1401.7042                                | 1401.7065 | 2      | 144   | 155 | IMNVGEPIDR            |           |        | Oxidation (M)   |  |
| 1406.681                                 | 1406.6829 | 1      | 226   | 239 | AHGGYSVFAGVGER        |           |        |                 |  |
| 1406.681                                 | 1406.6829 | 1      | 226   | 239 | AHGGYSVFAGVGER        | 28        | 99.829 |                 |  |
| 1435.7539                                | 1435.7545 | 0      | 311   | 324 | FTQAGSEVSALLGR        |           |        |                 |  |
| 1435.7539                                | 1435.7545 | 0      | 311   | 324 | FTQAGSEVSALLGR        | 62        | 100    |                 |  |
| 1439.7893                                | 1439.7858 | -2     | 262   | 294 | VALTGLTVAEYFR         |           |        |                 |  |
| 1473.8345                                | 1473.8369 | 2      | 213   | 225 | TVLIMELINNAK          |           |        | Oxidation (M)   |  |
| 1473.8345                                | 1473.8369 | 2      | 213   | 225 | TVLIMELINNAK          | 13        | 94.797 | Oxidation (M)   |  |
| 1617.8053                                | 1617.8105 | 3      | 265   | 279 | VALVYGGMNEPPGAR       |           |        | Oxidation (M)   |  |
| 1617.8053                                | 1617.8105 | 3      | 265   | 279 | VALVYGGMNEPPGAR       | 3         | 39.566 | Oxidation (M)   |  |
| 1650.9174                                | 1650.9211 | 2      | 95    | 109 | LVLEVAQHLGESTVR       | 24        | 99.592 |                 |  |
| 1650.9174                                | 1650.9211 | 2      | 95    | 109 | LVLEVAQHLGESTVR       |           |        |                 |  |
| 1796.9574                                | 1796.9711 | 8      | 144   | 159 | IMNVGEPIDRGPVK        |           |        | Oxidation (M)   |  |
| 1796.9574                                | 1796.9711 | 8      | 144   | 159 | IMNVGEPIDRGPVK        | 4         | 53.625 | Oxidation (M)   |  |
| 1831.8643                                | 1831.8785 | 8      | 407   | 422 | IMDPNIVGSEHYDVAR      |           |        | Oxidation (M)   |  |
| 1831.8643                                | 1831.8785 | 8      | 407   | 422 | IMDPNIVGSEHYDVAR      | 12        | 93.524 | Oxidation (M)   |  |
| 1919.0959                                | 1919.1094 | 7      | 125   | 143 | VLDGSAPIKIPVGPETLGR   | 57        | 100    |                 |  |
| 1919.0959                                | 1919.1094 | 7      | 125   | 143 | VLDGSAPIKIPVGPETLGR   |           |        |                 |  |
| 1988.0334                                | 1988.0475 | 7      | 388   | 406 | AIAEELGIYPAVDPLDSTR   | 45        | 99.996 |                 |  |
| 1988.0334                                | 1988.0475 | 7      | 388   | 406 | AIAEELGIYPAVDPLDSTR   |           |        |                 |  |
| 2039.0055                                | 2039.0231 | 9      | 463   | 480 | FLSQPFQVAEVFTGHMGK    |           |        | Oxidation (M)   |  |
| 2298.074                                 | 2298.1057 | 14     | 325   | 345 | IPSAVGYQPTLATDMGTMQER |           |        | 2 Oxidation (M) |  |

| Spot 162 (20080606-B6) Atp5b (precursor) |           |        |       |     |                           |           |        |                 |  |
|------------------------------------------|-----------|--------|-------|-----|---------------------------|-----------|--------|-----------------|--|
| PMF/MALDI                                |           |        |       |     |                           |           |        |                 |  |
| Calculated                               | Observed  | +/-ppm | start | end | Sequence                  | Ion Score | C.I. % | Modification    |  |
| 1649.9101                                | 1650.9224 | 3      | 95    | 109 | R.LVLEVAQHLGESTVR.T       |           |        |                 |  |
| 1261.6336                                | 1262.6232 | -14    | 110   | 121 | R.TIAMDGTEGLVR.G          |           |        |                 |  |
| 1277.6286                                | 1278.6355 | 0      | 110   | 121 | R.TIAMDGTEGLVR.G          |           |        | Oxidation (M)   |  |
| 1037.5969                                | 1038.5923 | -2     | 134   | 143 | K.IPVGPETLGR.I            |           |        |                 |  |
| 1400.6969                                | 1401.7062 | 1      | 144   | 155 | R.IMNVGEPIDR.G            |           |        | Oxidation (M)   |  |
| 1087.6277                                | 1088.6343 | -1     | 189   | 198 | K.VVDLLAPYAK.G            |           |        |                 |  |
| 974.5549                                 | 975.5807  | -2     | 202   | 212 | K.IGLFGGAGVGK.T           |           |        |                 |  |
| 1472.8272                                | 1473.8379 | 2      | 213   | 225 | K.TVLIMELINNAK.A          |           |        | Oxidation (M)   |  |
| 1405.6739                                | 1406.6832 | 1      | 226   | 239 | K.AHGGYSVFAGVGER.T        |           |        |                 |  |
| 2075.9833                                | 2077.0432 | 25     | 242   | 259 | R.EGNDLYHEMIESGVINLK.D    |           |        | Oxidation (M)   |  |
| 1616.7981                                | 1617.8141 | 5      | 265   | 279 | K.VALVYGGMNEPPGAR.A       |           |        | Oxidation (M)   |  |
| 1438.782                                 | 1439.7874 | -1     | 262   | 294 | R.VALTGLTVAEYFR.D         |           |        |                 |  |
| 1434.7467                                | 1435.7546 | 0      | 311   | 324 | R.FTQAGSEVSALLGR.I        |           |        |                 |  |
| 2297.0668                                | 2298.1091 | 15     | 325   | 345 | R.IPSAVGYQPTLATDMGTMQER.I |           |        | 2 Oxidation (M) |  |
| 1987.0262                                | 1988.0508 | 9      | 388   | 406 | R.AIAEELGIYPAVDPLDSTR.I   |           |        |                 |  |
| 1830.857                                 | 1831.8818 | 10     | 407   | 422 | R.IMDPNIVGSEHYDVAR.G      |           |        | Oxidation (M)   |  |
| 2037.9983                                | 2039.0341 | 14     | 463   | 480 | R.FLSQPFQVAEVFTGHMGK.L    |           |        | Oxidation (M)   |  |

| Spot 162 (20080606-B6) Atp5b |           |        |       |     |                             |           |                    |
|------------------------------|-----------|--------|-------|-----|-----------------------------|-----------|--------------------|
| PMF/MALDI                    |           |        |       |     |                             |           |                    |
| Calculated                   | Observed  | +/-ppm | start | end | Sequence                    | Ion Score | C.I.% Modification |
| 1649.9101                    | 1650.9224 | 3      | 41    | 55  | R.LVLEVAQHLGESTV.R.T        |           |                    |
| 1261.6336                    | 1262.6232 | -14    | 56    | 67  | R.TIAMDGTEGLV.R.G           |           |                    |
| 1277.6286                    | 1278.6355 | 0      | 56    | 67  | R.TIAMDGTEGLV.R.G           |           | Oxidation (M)      |
| 1918.0888                    | 1919.1121 | 8      | 71    | 89  | K.VLDSGAPIKIPVGPETLGR.I     |           |                    |
| 1037.5869                    | 1038.5923 | -2     | 80    | 89  | K.IPVGPETLGR.I              |           |                    |
| 1400.6969                    | 1401.7062 | 1      | 90    | 101 | R.IMNVGEPIDER.G             |           | Oxidation (M)      |
| 1795.9502                    | 1796.9758 | 10     | 90    | 105 | R.IMNVGEPIDERGPIK.T         |           | Oxidation (M)      |
| 1087.6277                    | 1088.6343 | -1     | 135   | 144 | K.VVDLLAPYAK.G              |           |                    |
| 1216.6928                    | 1217.7041 | 3      | 145   | 158 | K.GGKIGLFGGAGVGK.T          |           |                    |
| 974.5549                     | 975.5607  | -2     | 148   | 158 | K.IGLFGGAGVGK.T             |           |                    |
| 1472.8272                    | 1473.8379 | 2      | 159   | 171 | K.TVLIMELINNAK.A            |           | Oxidation (M)      |
| 1405.6739                    | 1406.6832 | 1      | 172   | 185 | K.AHGGYSVYFAGVGER.T         |           |                    |
| 2075.9633                    | 2077.0432 | 25     | 188   | 205 | R.EGNLHYHEMIESGVINLK.D      |           | Oxidation (M)      |
| 1616.7961                    | 1617.8141 | 5      | 211   | 225 | K.VALTYGGMNEPFGAR.A         |           | Oxidation (M)      |
| 1438.782                     | 1439.7874 | -1     | 228   | 240 | R.VALTGLTVAEYFR.D           |           |                    |
| 1434.7467                    | 1435.7546 | 0      | 257   | 270 | R.FTOAGSEYVALLGR.I          |           |                    |
| 2297.0668                    | 2298.1091 | 15     | 271   | 291 | R.IPSAVGYOPTLATDMGTMOER.I   |           | 2 Oxidation (M)    |
| 1987.0262                    | 1988.0508 | 9      | 334   | 352 | R.AIAELGIYPAVDPLDSTSR.I     |           |                    |
| 1830.857                     | 1831.8818 | 10     | 353   | 368 | R.IMDPNIGSEHYDVAR.G         |           | Oxidation (M)      |
| 2690.3684                    | 2691.4434 | 25     | 379   | 402 | K.SLDQIAILGMDELSEEDKLTYSR.A |           | Oxidation (M)      |
| 2037.9983                    | 2039.0341 | 14     | 409   | 426 | R.FLSQPFQVAEYVFTGHMGK.L     |           | Oxidation (M)      |
| 1039.6641                    | 1040.665  | -6     | 427   | 435 | K.LVPLKETIK.G               |           |                    |

| Spot 162 (20080606-B6) Tubb5 |           |        |       |     |                     |           |                    |
|------------------------------|-----------|--------|-------|-----|---------------------|-----------|--------------------|
| PMF/MALDI                    |           |        |       |     |                     |           |                    |
| Calculated                   | Observed  | +/-ppm | start | end | Sequence            | Ion Score | C.I.% Modification |
| 1300.6299                    | 1301.6589 | 17     | 47    | 58  | R.ISVYYNEATGGK.Y    |           |                    |
| 1630.8236                    | 1631.8336 | 2      | 63    | 77  | R.AILVDLEPGTMDSVR.S |           | Oxidation (M)      |
| 1129.588                     | 1130.6001 | 4      | 242   | 251 | R.FPGQLNADLR.K      |           |                    |
| 1158.6219                    | 1159.6276 | -1     | 253   | 262 | K.LAVNMVFPFR.L      |           | Oxidation (M)      |
| 1619.8283                    | 1620.8143 | -13    | 263   | 276 | R.LHFFMPGFAPLTSR.G  |           |                    |
| 1658.8879                    | 1659.8839 | -7     | 283   | 297 | R.ALTVPQLTQGVFDAQ.N |           |                    |
| 1038.5862                    | 1039.5927 | -1     | 310   | 318 | R.YLTVAAVFR.G       |           |                    |
| 1695.8257                    | 1696.8177 | -9     | 337   | 350 | K.NSSYFVEWIPNNVK.T  |           |                    |
| 1244.586                     | 1245.5939 | 1      | 381   | 390 | R.ISEQFTAMFR.R      |           | Oxidation (M)      |

| Spot 162 (20080606-B6) Tubb2c |           |        |       |     |                     |           |                    |
|-------------------------------|-----------|--------|-------|-----|---------------------|-----------|--------------------|
| PMF/MALDI                     |           |        |       |     |                     |           |                    |
| Calculated                    | Observed  | +/-ppm | start | end | Sequence            | Ion Score | C.I.% Modification |
| 1327.6408                     | 1328.6482 | 0      | 47    | 58  | R.INVYYNEATGGK.Y    |           |                    |
| 1616.808                      | 1617.8141 | -1     | 63    | 77  | R.AVLVDLEPGTMDSVR.S |           | Oxidation (M)      |
| 1129.588                      | 1130.6001 | 4      | 242   | 251 | R.FPGQLNADLR.K      |           |                    |
| 1158.6219                     | 1159.6276 | -1     | 253   | 262 | K.LAVNMVFPFR.L      |           | Oxidation (M)      |
| 1619.8283                     | 1620.8143 | -13    | 263   | 276 | R.LHFFMPGFAPLTSR.G  |           |                    |
| 1706.8549                     | 1707.8745 | 7      | 283   | 297 | R.ALTVPQLTQGMFDAQ.N |           | Oxidation (M)      |
| 1038.5862                     | 1039.5927 | -1     | 310   | 318 | R.YLTVAAVFR.G       |           |                    |
| 1695.8257                     | 1696.8177 | -9     | 337   | 350 | K.NSSYFVEWIPNNVK.T  |           |                    |
| 1244.586                      | 1245.5939 | 1      | 381   | 390 | R.ISEQFTAMFR.R      |           | Oxidation (M)      |

| Spot 162 (20080606-B6) Tubb3 |           |        |       |     |                     |           |                    |
|------------------------------|-----------|--------|-------|-----|---------------------|-----------|--------------------|
| PMF/MALDI                    |           |        |       |     |                     |           |                    |
| Calculated                   | Observed  | +/-ppm | start | end | Sequence            | Ion Score | C.I.% Modification |
| 1630.8236                    | 1631.8336 | 2      | 63    | 77  | R.AILVDLEPGTMDSVR.S |           | Oxidation (M)      |
| 1129.588                     | 1130.6001 | 4      | 242   | 251 | R.FPGQLNADLR.K      |           |                    |
| 1158.6219                    | 1159.6276 | -1     | 253   | 262 | K.LAVNMVFPFR.L      |           | Oxidation (M)      |
| 1619.8283                    | 1620.8143 | -13    | 263   | 276 | R.LHFFMPGFAPLTSR.G  |           | Oxidation (M)      |
| 1706.8549                    | 1707.8745 | 7      | 283   | 297 | R.ALTVPQLTQGMFDAQ.N |           | Oxidation (M)      |
| 1068.5968                    | 1069.6086 | 4      | 310   | 318 | R.YLTVATVFR.G       |           |                    |
| 1405.6759                    | 1406.6832 | 0      | 325   | 336 | K.EVDEQMLAQSK.N     |           | Oxidation (M)      |
| 1695.8257                    | 1696.8177 | -9     | 337   | 350 | K.NSSYFVEWIPNNVK.V  |           |                    |
| 1244.586                     | 1245.5939 | 1      | 381   | 390 | R.ISEQFTAMFR.R      |           | Oxidation (M)      |

| Spot 162 (20080606-B6) Tubb2a |           |        |       |     |                     |           |                    |
|-------------------------------|-----------|--------|-------|-----|---------------------|-----------|--------------------|
| PMF/MALDI                     |           |        |       |     |                     |           |                    |
| Calculated                    | Observed  | +/-ppm | start | end | Sequence            | Ion Score | C.I.% Modification |
| 1630.8236                     | 1631.8336 | 2      | 63    | 77  | R.AILVDLEPGTMDSVR.S |           | Oxidation (M)      |
| 1350.6676                     | 1351.6962 | 16     | 163   | 174 | R.IMNTFSVMPSPK.V    |           |                    |
| 1129.588                      | 1130.6001 | 4      | 242   | 251 | R.FPGQLNADLR.K      |           |                    |
| 1158.6219                     | 1159.6276 | -1     | 253   | 262 | K.LAVNMVFPFR.L      |           | Oxidation (M)      |
| 1619.8283                     | 1620.8143 | -13    | 263   | 276 | R.LHFFMPGFAPLTSR.G  |           |                    |
| 1706.8549                     | 1707.8745 | 7      | 283   | 297 | R.ALTVPQLTQGMFDSK.N |           |                    |
| 1695.8257                     | 1696.8177 | -9     | 337   | 350 | K.NSSYFVEWIPNNVK.T  |           |                    |
| 1244.586                      | 1245.5939 | 1      | 381   | 390 | R.ISEQFTAMFR.R      |           | Oxidation (M)      |

| Spot 162 (20080606-B6) Tubb2a |           |        |       |     |                     |           |                    |
|-------------------------------|-----------|--------|-------|-----|---------------------|-----------|--------------------|
| PMF/MALDI                     |           |        |       |     |                     |           |                    |
| Calculated                    | Observed  | +/-ppm | start | end | Sequence            | Ion Score | C.I.% Modification |
| 1630.8236                     | 1631.8336 | 2      | 63    | 77  | R.AILVDLEPGTMDSVR.S |           | Oxidation (M)      |
| 1350.6676                     | 1351.6962 | 16     | 163   | 174 | R.IMNTFSVMPSPK.V    |           |                    |
| 1129.588                      | 1130.6001 | 4      | 242   | 251 | R.FPGQLNADLR.K      |           |                    |
| 1158.6219                     | 1159.6276 | -1     | 253   | 262 | K.LAVNMVFPFR.L      |           | Oxidation (M)      |
| 1619.8283                     | 1620.8143 | -13    | 263   | 276 | R.LHFFMPGFAPLTSR.G  |           |                    |
| 1706.8549                     | 1707.8745 | 7      | 283   | 297 | R.ALTVPQLTQGMFDSK.N |           |                    |
| 1695.8257                     | 1696.8177 | -9     | 337   | 350 | K.NSSYFVEWIPNNVK.T  |           |                    |
| 1244.586                      | 1245.5939 | 1      | 381   | 390 | R.ISEQFTAMFR.R      |           | Oxidation (M)      |

# Spot 167 (D1 20070719) – predicted: Importin 5 (Ipo5)

SUB (4700 Reflector Spec #1 MC=>BC=>MC[BP = 842.5, 6848] , <<E15\_MS\_1>> 4700 Reflector Spec #1 MC=>BC=>MC[BP = 842.5, 88

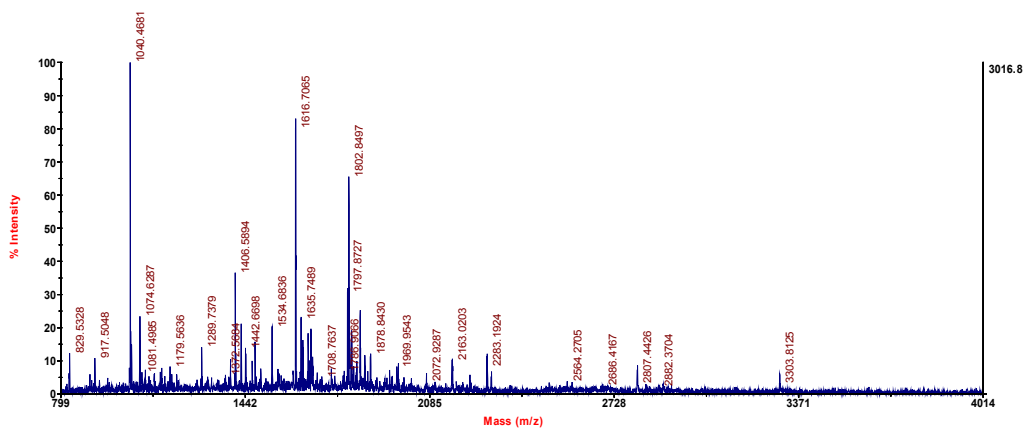

| Spot 167 (20070719-D1) Ipo5 (predicted) |           |        |       |      |                          |                 |
|-----------------------------------------|-----------|--------|-------|------|--------------------------|-----------------|
| PMF/MALDI                               |           |        |       |      |                          |                 |
| Calculated                              | Observed  | +/-ppm | start | end  | Sequence                 |                 |
| 1533.7423                               | 1534.6836 | -43    | 68    | 80   | R.KQAEETYENIPGR.S        |                 |
| 1405.6473                               | 1406.5894 | -46    | 69    | 80   | K.QAEETYENIPGR.S         |                 |
| 1288.7867                               | 1289.7379 | -43    | 81    | 91   | R.SKITFLLOAIR.N          |                 |
| 1073.6597                               | 1074.6287 | -36    | 83    | 91   | K.ITFLLOAIR.N            |                 |
| 961.4465                                | 962.4514  | -2     | 92    | 100  | R.NTTAAEEAR.Q            |                 |
| 916.5164                                | 917.5048  | -21    | 101   | 108  | R.QMAAVLLR.R             | Oxidation (M)   |
| 1072.6175                               | 1073.5883 | -34    | 101   | 109  | R.QMAAVLLRR.L            | Oxidation (M)   |
| 1943.9002                               | 1944.8784 | -15    | 132   | 147  | K.SELMIIQMETQSSMR.K      | 3 Oxidation (M) |
| 2071.9952                               | 2072.9287 | -36    | 132   | 148  | K.SELMIIQMETQSSMRK.K     | 3 Oxidation (M) |
| 1840.8591                               | 1841.8136 | -29    | 160   | 175  | R.NLIDEGNQQWPEGLK.F      |                 |
| 1615.7664                               | 1616.7065 | -42    | 176   | 189  | K.FLFDVSSQNMGLR.E        | Oxidation (M)   |
| 1828.9835                               | 1829.928  | -34    | 237   | 253  | R.ATAAFILANEHNVALFK.H    |                 |
| 1674.7494                               | 1675.6906 | -39    | 402   | 414  | K.EHIMQMLQADWVK.Y        | 2 Oxidation (M) |
| 1993.9138                               | 1994.9261 | 3      | 402   | 416  | K.EHIMQMLQADWVKYR.H      | 2 Oxidation (M) |
| 1785.9043                               | 1786.9066 | -3     | 483   | 498  | K.VIAALLGTMEDGGNQR.V     |                 |
| 1801.8992                               | 1802.8497 | -32    | 483   | 498  | K.VIAALLGTMEDGGNQR.V     | Oxidation (M)   |
| 1092.6114                               | 1093.5751 | -40    | 529   | 537  | K.HLHSIMVLK.L            | Oxidation (M)   |
| 1634.8055                               | 1635.7489 | -39    | 568   | 580  | K.FVPYYDLFMPSLK.H        | Oxidation (M)   |
| 1036.5665                               | 1037.5446 | -28    | 581   | 589  | K.HIVENAVGK.E            |                 |
| 1926.9431                               | 1927.9302 | -36    | 612   | 627  | K.EKFMGDASDVMLLLK.T      | 2 Oxidation (M) |
| 1637.8157                               | 1638.7701 | -32    | 614   | 627  | K.FMGDASDVMLLLK.T        |                 |
| 1669.8055                               | 1670.7598 | -32    | 614   | 627  | K.FMGDASDVMLLLK.T        | 2 Oxidation (M) |
| 1810.8998                               | 1811.8496 | -32    | 659   | 673  | K.EFGDYLPLVVMGSLMK.T     | 2 Oxidation (M) |
| 1818.8202                               | 1819.8508 | 13     | 720   | 734  | K.STACQMLVCYAKELK.E      | Oxidation (M)   |
| 1796.9196                               | 1797.8727 | -30    | 732   | 746  | K.ELKEGFVEYTEQVVK.L      |                 |
| 1426.698                                | 1427.6392 | -46    | 735   | 746  | K.EGFVEYTEQVVK.L         |                 |
| 828.5143                                | 829.5328  | 14     | 747   | 753  | K.LMVPLLK.F              | Oxidation (M)   |
| 1039.4876                               | 1040.4681 | -26    | 754   | 761  | K.FYFHGQVR.V             |                 |
| 2162.0201                               | 2163.0203 | -3     | 797   | 816  | K.AIGTEPDSVLSSEIMHSFAK.C | Oxidation (M)   |
| 1441.7313                               | 1442.6698 | -48    | 842   | 852  | K.LEEHFKNQELR.Q          |                 |
| 1494.7718                               | 1495.708  | -48    | 883   | 895  | K.VSDILHSIFSSYK.E        |                 |
| 1751.9094                               | 1752.8333 | -48    | 883   | 897  | K.VSDILHSIFSSYKEK.V      |                 |
| 826.5137                                | 827.5179  | -4     | 1101  | 1107 | K.RLANVVR.Q              |                 |

| Spot 167 (P1036 sample O090618-01) Ipo5<br>LCMS/MS (Scaffold) |                    |                                                                                                          |                         |                   |                      |                               |               |                 |                           |              |                     |
|---------------------------------------------------------------|--------------------|----------------------------------------------------------------------------------------------------------|-------------------------|-------------------|----------------------|-------------------------------|---------------|-----------------|---------------------------|--------------|---------------------|
| Sample Name                                                   | Acc No.            | Proteins(s) inferred                                                                                     | No. Peptides identified | Sequence Coverage | Position in sequence | Peptide Sequence              | Precursor m/z | Charge observed | Calculated mass (neutral) | Mascot score | Mascot Expect value |
| P1036-0090618-01                                              | ENSRNOP00000014859 | ens ENSRNOP00000014859 ENSRNOG00000010989 transcript:ENSRNOT00000014859 Tax_id=10116 [Rattus norvegicus] | 32                      | 39.40%            | 40 - 50              | (R)SKITFLLOAIR(N)             | 430.6         | 3               | 1288.79                   | 41.7         | 3.15E-03            |
|                                                               |                    |                                                                                                          |                         |                   | 499 - 505            | (K)LQELIQK(G)                 | 436.27        | 2               | 870.52                    | 41           | 2.04E-02            |
|                                                               |                    |                                                                                                          |                         |                   | 60 - 67              | (R)QMAAVLLR(R)                | 451.27        | 2               | 900.52                    | 46.5         | 8.49E-03            |
|                                                               |                    |                                                                                                          |                         |                   | 843 - 855            | (K)YSDILHSIFSSYK(E)           | 499.27        | 3               | 1494.77                   | 35.1         | 9.98E-02            |
|                                                               |                    |                                                                                                          |                         |                   | 42 - 50              | (K)ITFLLOAIR(N)               | 537.84        | 2               | 1073.66                   | 84.9         | 2.88E-07            |
|                                                               |                    |                                                                                                          |                         |                   | 42 - 50              | (K)ITFLLOAIR(N)               | 537.84        | 2               | 1073.66                   | 58.3         | 1.23E-04            |
|                                                               |                    |                                                                                                          |                         |                   | 529 - 541            | (K)FVPPYYDLFMPSLK(H)          | 540.61        | 3               | 1618.81                   | 42.9         | 1.82E-02            |
|                                                               |                    |                                                                                                          |                         |                   | 575 - 588            | (K)FMQDASDVMQLLK(T)           | 546.95        | 3               | 1637.81                   | 50.7         | 3.01E-03            |
|                                                               |                    |                                                                                                          |                         |                   | 843 - 857            | (K)YSDILHSIFSSYK(V)           | 584.98        | 3               | 1751.91                   | 60.6         | 2.75E-04            |
|                                                               |                    |                                                                                                          |                         |                   | 239 - 249            | (K)SLVEIADTVPK(Y)             | 586.33        | 2               | 1170.65                   | 39           | 3.71E-02            |
|                                                               |                    |                                                                                                          |                         |                   | 196 - 212            | (R)ATAAFILANEHNVALFK(H)       | 610.67        | 3               | 1828.98                   | 43.6         | 1.12E-02            |
|                                                               |                    |                                                                                                          |                         |                   | 196 - 212            | (R)ATAAFILANEHNVALFK(H)       | 611           | 3               | 1829.98                   | 32.2         | 1.82E-01            |
|                                                               |                    |                                                                                                          |                         |                   | 963 - 979            | (K)TKENVNATENCISAVGK(I)       | 612.63        | 3               | 1834.87                   | 43           | 1.41E-02            |
|                                                               |                    |                                                                                                          |                         |                   | 176 - 190            | (R)MLVQcMODQEHPSIR(T)         | 624.95        | 3               | 1871.83                   | 29.9         | 1.51E-01            |
|                                                               |                    |                                                                                                          |                         |                   | 573 - 588            | (K)EKFMDASDVMQLLK(T)          | 632.66        | 3               | 1894.95                   | 40.9         | 2.75E-02            |
|                                                               |                    |                                                                                                          |                         |                   | 91 - 106             | (K)SELLMIQMETQSSMR(K)         | 632.98        | 3               | 1895.92                   | 46.5         | 7.06E-03            |
|                                                               |                    |                                                                                                          |                         |                   | 40 - 50              | (R)SKITFLLOAIR(N)             | 645.4         | 2               | 1288.79                   | 72.4         | 2.50E-06            |
|                                                               |                    |                                                                                                          |                         |                   | 279 - 297            | (R)QLALEVIVLTSETAAAMLR(K)     | 677.05        | 3               | 2028.13                   | 57.6         | 2.39E-04            |
|                                                               |                    |                                                                                                          |                         |                   | 478 - 489            | (K)SLIPIYLDNLVK(H)            | 694.41        | 2               | 1386.81                   | 39.7         | 1.35E-02            |
|                                                               |                    |                                                                                                          |                         |                   | 509 - 528            | (K)LVLEGVVTSIASVADTAEEK(F)    | 701.38        | 3               | 2101.12                   | 70.5         | 2.29E-05            |
|                                                               |                    |                                                                                                          |                         |                   | 509 - 528            | (K)LVLEGVVTSIASVADTAEEK(F)    | 701.38        | 3               | 2101.12                   | 103          | 1.26E-08            |
|                                                               |                    |                                                                                                          |                         |                   | 26 - 39              | (K)QAEETENIPGR(S)             | 703.83        | 2               | 1405.65                   | 77.1         | 3.88E-06            |
|                                                               |                    |                                                                                                          |                         |                   | 696 - 707            | (K)EGFVEYTEQVVK(L)            | 714.36        | 2               | 1426.7                    | 54.1         | 1.07E-03            |
|                                                               |                    |                                                                                                          |                         |                   | 757 - 776            | (K)AIGTEPDSVLEIMHSFAK(C)      | 716.35        | 3               | 2146.03                   | 34.5         | 9.53E-02            |
|                                                               |                    |                                                                                                          |                         |                   | 843 - 855            | (K)YSDILHSIFSSYK(E)           | 748.39        | 2               | 1494.77                   | 58.5         | 4.56E-04            |
|                                                               |                    |                                                                                                          |                         |                   | 27 - 39              | (R)QAEETENIPGR(S)             | 767.88        | 2               | 1533.74                   | 84.1         | 1.23E-06            |
|                                                               |                    |                                                                                                          |                         |                   | 69 - 90              | (R)LLSSAFDEVYPALPSDVQTAIK(S)  | 788.75        | 3               | 2363.23                   | 43.2         | 1.32E-02            |
|                                                               |                    |                                                                                                          |                         |                   | 135 - 148            | (K)FLFDSVSSGNMGLR(E)          | 800.89        | 2               | 1599.77                   | 88.4         | 3.79E-07            |
|                                                               |                    |                                                                                                          |                         |                   | 529 - 541            | (K)FVPPYYDLFMPSLK(H)          | 810.41        | 2               | 1618.81                   | 41.1         | 2.75E-02            |
|                                                               |                    |                                                                                                          |                         |                   | 363 - 375            | (K)EHIMQLGNADWK(Y)            | 822.39        | 2               | 1642.76                   | 72.1         | 1.17E-05            |
|                                                               |                    |                                                                                                          |                         |                   | 575 - 588            | (K)FMQDASDVMQLLK(T)           | 827.91        | 2               | 1653.81                   | 90.6         | 2.68E-07            |
|                                                               |                    |                                                                                                          |                         |                   | 68 - 90              | (R)LLSSAFDEVYPALPSDVQTAIK(S)  | 840.78        | 3               | 2519.33                   | 49.5         | 2.23E-03            |
|                                                               |                    |                                                                                                          |                         |                   | 499 - 505            | (K)LQELIQK(G)                 | 871.53        | 1               | 870.52                    | 56.6         | 5.61E-04            |
|                                                               |                    |                                                                                                          |                         |                   | 903 - 923            | (K)YAEYFLRPMQLQYVcDSNPEVR(D)  | 884.41        | 3               | 2650.22                   | 39           | 2.45E-02            |
|                                                               |                    |                                                                                                          |                         |                   | 444 - 459            | (K)VIAALLQTMEDQGNGR(V)        | 893.96        | 2               | 1785.91                   | 74.2         | 1.41E-05            |
|                                                               |                    |                                                                                                          |                         |                   | 444 - 459            | (K)VIAALLQTMEDQGNGR(V)        | 901.96        | 2               | 1801.9                    | 67.9         | 5.12E-05            |
|                                                               |                    |                                                                                                          |                         |                   | 2 - 26               | (M)AAAAEQQGFYLLGNLLSPDNVVR(K) | 915.15        | 3               | 2742.44                   | 50.5         | 1.86E-03            |
|                                                               |                    |                                                                                                          |                         |                   | 196 - 212            | (R)ATAAFILANEHNVALFK(H)       | 915.5         | 2               | 1828.98                   | 93.6         | 1.15E-07            |
|                                                               |                    |                                                                                                          |                         |                   | 119 - 134            | (R)NLIDEDGNNOVPEGLK(F)        | 921.44        | 2               | 1840.86                   | 71.5         | 1.66E-05            |
|                                                               |                    |                                                                                                          |                         |                   | 573 - 588            | (K)EKFMDASDVMQLLK(T)          | 948.49        | 2               | 1894.95                   | 68.9         | 4.35E-05            |
|                                                               |                    |                                                                                                          |                         |                   | 2 - 27               | (M)AAAAEQQGFYLLGNLLSPDNVVR(K) | 957.85        | 3               | 2870.53                   | 58.2         | 2.39E-04            |
|                                                               |                    |                                                                                                          |                         |                   | 509 - 528            | (K)LVLEGVVTSIASVADTAEEK(F)    | 1051.56       | 2               | 2101.11                   | 112          | 1.66E-09            |
|                                                               |                    |                                                                                                          |                         |                   | 757 - 776            | (K)AIGTEPDSVLEIMHSFAK(C)      | 1074.02       | 2               | 2146.02                   | 85.9         | 6.74E-07            |
|                                                               |                    |                                                                                                          |                         |                   |                      | (K)TASIKPEVALLDTQDMENMSDDDG   |               |                 |                           |              |                     |
|                                                               |                    |                                                                                                          |                         |                   | 635 - 673            | WEFVNLGDQQSFGIK(T)            | 1086.76       | 4               | 4343.01                   | 82.2         | 6.29E-07            |
|                                                               |                    |                                                                                                          |                         |                   | 69 - 90              | (R)LLSSAFDEVYPALPSDVQTAIK(S)  | 1182.62       | 2               | 2363.23                   | 68.7         | 3.71E-05            |
|                                                               |                    |                                                                                                          |                         |                   |                      | (K)TQDFNDMEDDDPGISYMISAWAR(M) |               |                 |                           |              |                     |
|                                                               |                    |                                                                                                          |                         |                   | 589 - 612            |                               | 1425.11       | 2               | 2848.2                    | 74.9         | 1.69E-06            |
|                                                               |                    |                                                                                                          |                         |                   |                      | (K)TASIKPEVALLDTQDMENMSDDDG   |               |                 |                           |              |                     |
|                                                               |                    |                                                                                                          |                         |                   | 635 - 673            | WEFVNLGDQQSFGIK(T)            | 1448.67       | 3               | 4343                      | 78.5         | 1.38E-06            |

## Spot 170 (D3 20080606) Protein phosphatase 2A activator, regulatory subunit 4 (Protein phosphatase 2A, regulatory subunit B (PR 53)) (Ppp2r4)

SUB (4700 Reflector Spec #1 MC=>BC=>MC[BP = 842.5, 31457] , <<C1\_MS\_1>> 4700 Reflector Spec #1 MC=>BC=>MC[BP = 882.6, 67

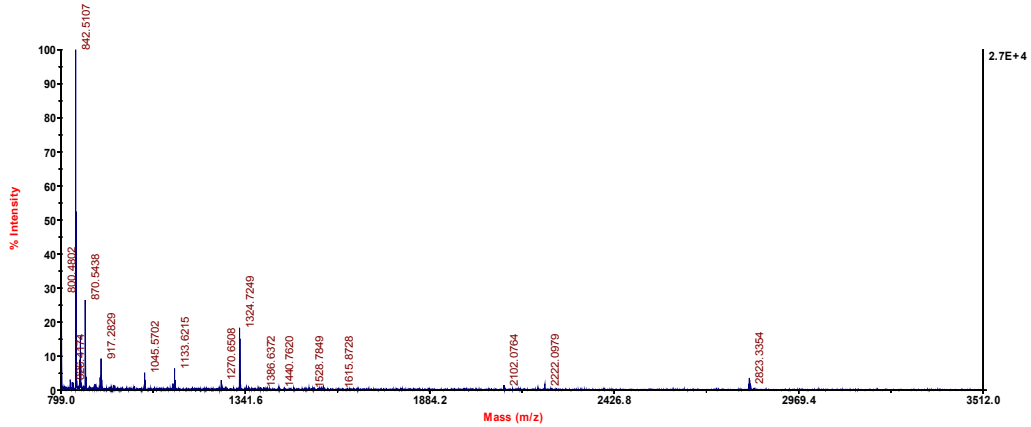

| Spot 170 (20080606-D3) Ppp2r4 |           |        |       |     |                        |               |
|-------------------------------|-----------|--------|-------|-----|------------------------|---------------|
| PMF/MALDI                     |           |        |       |     |                        |               |
| Calculated                    | Observed  | +/-ppm | start | end | Sequence               |               |
| 1269.6387                     | 1270.6508 | 4      | 28    | 38  | K KEIHTVPDMGK.W        |               |
| 1439.7231                     | 1440.762  | 22     | 29    | 40  | K EIHTVPDMGKWK.R       | Oxidation (M) |
| 2101.0732                     | 2102.0764 | -2     | 42    | 60  | R SQAYADYIGFILTLNEGK.G |               |
| 913.4909                      | 914.4992  | 1      | 63    | 69  | K KLTFDYK.V            |               |
| 1127.655                      | 1128.6689 | 6      | 77    | 86  | K LVALLDLDR.W          |               |
| 854.4399                      | 855.4559  | 10     | 100   | 106 | R FGNKAYR.T            |               |
| 1132.6128                     | 1133.6215 | 1      | 174   | 183 | R VDDQVANFK.V          |               |
| 1342.6703                     | 1343.6556 | -16    | 184   | 193 | K VFDRYLEVMR.K         | Oxidation (M) |
| 825.4055                      | 826.4174  | 6      | 188   | 193 | R YLEVMR.K             | Oxidation (M) |
| 953.5004                      | 954.5139  | 6      | 188   | 194 | R YLEVMR.K.L           | Oxidation (M) |
| 807.4603                      | 808.4556  | -15    | 195   | 200 | K LQKTYR.M             |               |
| 1323.7187                     | 1324.7249 | -1     | 311   | 323 | K FGSLLPIHPVTSG.-      |               |

## Spot 170 (D11 20080815) - Microtubule-associated protein RP/EB family member 1 (Mapre1)

4700 Reflector Spec #1 MC=>BC=>MC[BP = 882.6, 12669]

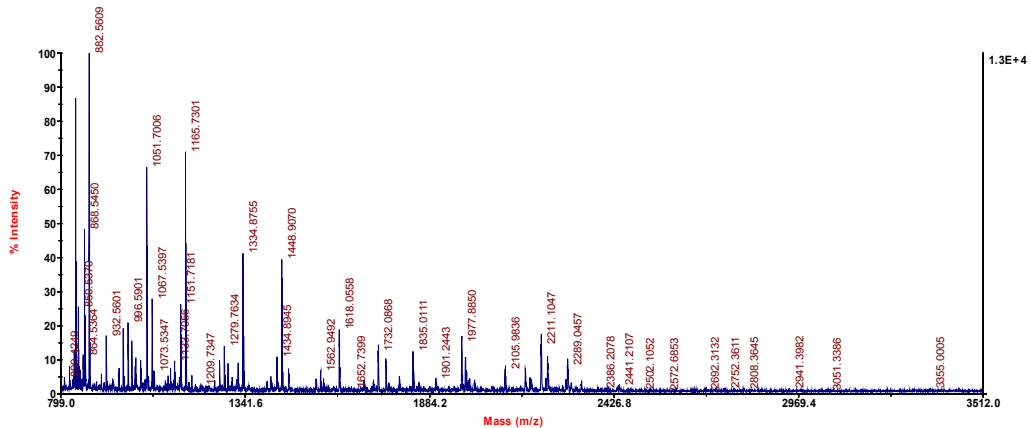

| Spot 170 (20080815-D11) Ppp2r4 |           |        |       |     |                      |                 |
|--------------------------------|-----------|--------|-------|-----|----------------------|-----------------|
| MS+MS/MS                       |           |        |       |     |                      |                 |
| Calculated                     | Observed  | +/-ppm | start | end | Sequence             |                 |
| 932.5675                       | 932.5603  | -8     | 77    | 84  | ILIQAGFKR            |                 |
| 1320.6583                      | 1320.6429 | -12    | 67    | 76  | LEHEYIQNFK           |                 |
| 1794.9174                      | 1794.8583 | -33    | 63    | 76  | FQAKLEHEYIQNFK       |                 |
| 1835.0245                      | 1835.0121 | -7     | 151   | 168 | KPLGSGSAAPQRPIATOR   |                 |
| 1835.0245                      | 1835.0121 | -7     | 151   | 168 | KPLGSGSAAPQRPIATOR   |                 |
| 1977.8977                      | 1977.8853 | -6     | 114   | 130 | FFDANYDGKEYDPVAAR    | 10 94.941       |
| 1977.8977                      | 1977.8853 | -6     | 114   | 130 | FFDANYDGKEYDPVAAR    |                 |
| 1992.1124                      | 1992.0796 | -16    | 131   | 150 | QGQETAVAPSLVAPALSKPK |                 |
| 2163.9644                      | 2163.9788 | 7      | 182   | 201 | KNPGMGNGDDEAAELMQQVK | 2 Oxidation (M) |

# Spot 174 (B13 20080606) - Septin-2 (Sept2)

SUB (4700 Reflector Spec #1 MC=>BC=>MC[BP = 842.5, 64994] , <<A1\_MS\_1>> 4700 Reflector Spec #1 MC=>BC=>MC[BP = 882.6, 21

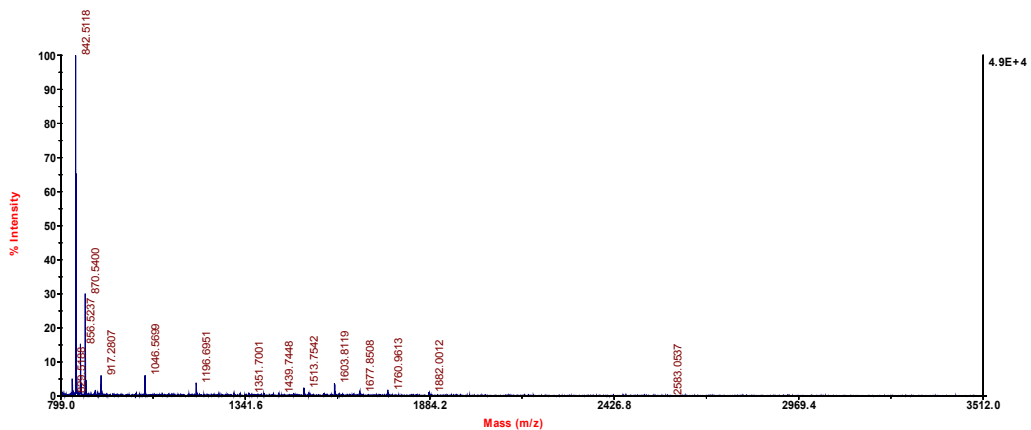

| Spot 174 (20080606-B13) Sept2 |           |        |       |     |                   |           |
|-------------------------------|-----------|--------|-------|-----|-------------------|-----------|
| MS+MS/MS                      |           |        |       |     |                   |           |
| Calculated                    | Observed  | +/-ppm | start | end | Sequence          | Ion Score |
| 858.493                       | 858.5201  | 32     | 319   | 325 | DQILLEK           |           |
| 952.6189                      | 952.6111  | -8     | 175   | 183 | VNIYVPIAK         |           |
| 1046.5841                     | 1046.5691 | -14    | 184   | 192 | ADTLTKER          | 0         |
| 1046.5841                     | 1046.5691 | -14    | 184   | 192 | ADTLTKER          | 0         |
| 1196.6997                     | 1196.698  | -1     | 67    | 77  | IIPGAAEKIER       |           |
| 1196.6997                     | 1196.698  | -1     | 67    | 77  | IIPGAAEKIER       | 26        |
| 1325.6947                     | 1325.6918 | -2     | 199   | 209 | ILDEIEHSIK        |           |
| 1513.7533                     | 1513.7513 | -1     | 117   | 126 | TIISYIDEQFER      |           |
| 1513.7533                     | 1513.7513 | -1     | 117   | 126 | TIISYIDEQFER      | 19        |
| 1603.8174                     | 1603.8112 | -4     | 78    | 91  | TVQIEASTVEIEER    |           |
| 1603.8174                     | 1603.8112 | -4     | 78    | 91  | TVQIEASTVEIEER    | 29        |
| 1677.8442                     | 1677.8506 | 4      | 97    | 112 | LTVVDTPGYGDAINSR  | 26        |
| 1677.8442                     | 1677.8506 | 4      | 97    | 112 | LTVVDTPGYGDAINSR  | 99.704    |
| 1759.9589                     | 1759.9509 | -5     | 233   | 249 | ASIPFSVVGSNQLIEAK |           |
| 1759.9589                     | 1759.9509 | -5     | 233   | 249 | ASIPFSVVGSNQLIEAK |           |
| 1881.9956                     | 1882.0024 | 4      | 51    | 66  | STLINSFLTDLYPER   |           |
| 1881.9956                     | 1882.0024 | 4      | 51    | 66  | STLINSFLTDLYPER   |           |

| Spot 174 (20080606-B13) Sept2 |           |        |       |     |                       |                 |
|-------------------------------|-----------|--------|-------|-----|-----------------------|-----------------|
| PMF/MALDI                     |           |        |       |     |                       |                 |
| Calculated                    | Observed  | +/-ppm | start | end | Sequence              | Ion Score       |
| 1880.9884                     | 1882.0012 | 3      | 51    | 66  | K.STLINSFLTDLYPER.I   |                 |
| 1196.6924                     | 1196.6951 | -4     | 67    | 77  | R.IIPGAAEKIER.T       |                 |
| 1602.8101                     | 1603.8119 | -3     | 78    | 91  | R.TVQIEASTVEIEER.G    |                 |
| 1886.9949                     | 1887.9987 | -2     | 78    | 94  | R.TVQIEASTVEIEERGVK.L |                 |
| 1676.837                      | 1677.8508 | 4      | 97    | 112 | R.LTVVDTPGYGDAINSR.D  |                 |
| 1512.746                      | 1513.7541 | 1      | 117   | 126 | K.TIISYIDEQFER.Y      |                 |
| 1045.5768                     | 1046.5699 | -13    | 184   | 192 | K.ADTLTKER.E          |                 |
| 1324.6874                     | 1325.6821 | -9     | 199   | 209 | R.ILDEIEHSIK.I        |                 |
| 1758.9516                     | 1759.9485 | -6     | 233   | 249 | K.ASIPFSVVGSNQLIEAK.G |                 |
| 909.4048                      | 910.4039  | -9     | 332   | 338 | R.MQEIAR.M            | 2 Oxidation (M) |



# Spot 177 (C11 20080606) Protein phosphatase 2A activator, regulatory subunit 4 (Protein phosphatase 2A, regulatory subunit B (PR 53)) (Ppp2r4)

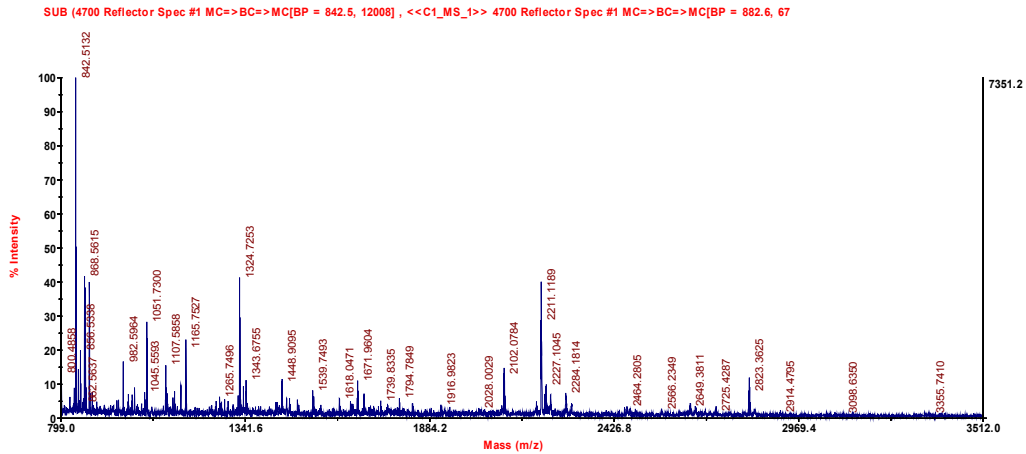

| Spot 177 (20080606.C11) Ppp2r4 |           |        |       |     |                          |           |       |               |  |
|--------------------------------|-----------|--------|-------|-----|--------------------------|-----------|-------|---------------|--|
| PMF/MALDI                      |           |        |       |     |                          |           |       |               |  |
| Calculated                     | Observed  | +/-ppm | start | end | Sequence                 | Ion Score | C.I.% | Modification  |  |
| 2238.1056                      | 2239.1313 | 8      | 7     | 27  | R.QPPDSEETPSATPTFIIPK    |           |       |               |  |
| 2101.0732                      | 2102.0784 | -1     | 42    | 60  | R.SQAYADYIGFILTLNEGK     |           |       |               |  |
| 2286.1896                      | 2287.2009 | 2      | 42    | 62  | R.SQAYADYIGFILTLNEGK     |           |       |               |  |
| 1669.8927                      | 1670.8972 | -2     | 63    | 76  | K.KLTFDYKVSEAIK          |           |       |               |  |
| 1541.7977                      | 1542.7842 | -13    | 64    | 76  | K.LTFDYKVSEAIK           |           |       |               |  |
| 1127.655                       | 1128.6617 | 0      | 77    | 86  | K.LVALLDLDR              |           |       |               |  |
| 2648.381                       | 2649.3811 | -3     | 77    | 99  | K.LVALLDLDRWIDETPPVDQPSR |           |       |               |  |
| 1538.7365                      | 1539.7493 | 4      | 87    | 99  | R.WIDETPPVDQPSR          |           |       |               |  |
| 1670.972                       | 1671.9604 | -11    | 169   | 183 | K.IGVLRVDDQVAVFK         |           |       |               |  |
| 1132.6128                      | 1133.6317 | 10     | 174   | 183 | R.VDDQVAVFK              |           |       |               |  |
| 1649.8777                      | 1650.8804 | -3     | 174   | 187 | R.VDDQVAVKVFDR           |           |       |               |  |
| 2441.2777                      | 2442.1736 | -46    | 174   | 193 | R.VDDQVAVKVFDRYLEVMR     |           |       |               |  |
| 1342.6703                      | 1343.6755 | -2     | 184   | 193 | K.VFDRYLEVMR             |           |       | Oxidation (M) |  |
| 1470.7653                      | 1471.7703 | -2     | 184   | 194 | K.VFDRYLEVMR             |           |       | Oxidation (M) |  |
| 1014.5651                      | 1015.5699 | -2     | 303   | 310 | K.FPVIQHF                |           |       |               |  |
| 1323.7187                      | 1324.7253 | 0      | 311   | 323 | K.FGSLPIHPVTSG           |           |       |               |  |

# Spot 180 (D21 20070719) – Protein disulfide-isomerase (P4hb, Pdia1)

4700 Reflector Spec #1 MC=>BC=>MC[BP = 2212.1, 9891]

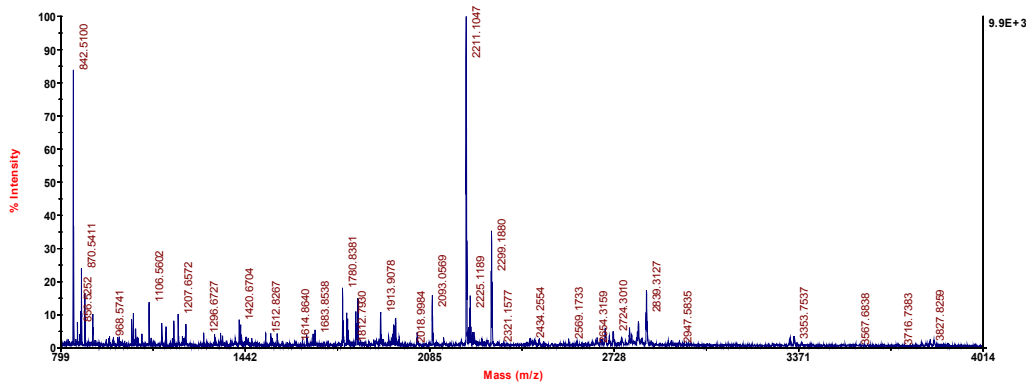

| Spot 180 (20070719-D21) P4hb, Pdia1 |           |        |       |     |                           |               |
|-------------------------------------|-----------|--------|-------|-----|---------------------------|---------------|
| MS•MS/MS                            |           |        |       |     |                           |               |
| Calculated                          | Observed  | +/-ppm | start | end | Sequence                  | Ion Score     |
| 910.4417                            | 910.442   | 0      | 447   | 454 | FFPASADR                  |               |
| 1424.7783                           | 1424.7697 | -6     | 198   | 209 | YQLDKDGVVLFK              |               |
| 1552.8733                           | 1552.8718 | -1     | 198   | 210 | YQLDKDGVVLFK              |               |
| 1655.766                            | 1655.7738 | 5      | 211   | 224 | FDEGRNDFEGETK             |               |
| 1780.8348                           | 1780.834  | 0      | 84    | 99  | VDATEESDLAQYGVGR          |               |
| 1780.8348                           | 1780.834  | 0      | 84    | 99  | VDATEESDLAQYGVGR          |               |
| 1833.913                            | 1833.9158 | 2      | 268   | 302 | ILFIFIDSDHTDNQR           | 6             |
| 1833.913                            | 1833.9158 | 2      | 268   | 302 | ILFIFIDSDHTDNQR           | 77.98         |
| 1912.9034                           | 1912.9113 | 4      | 211   | 226 | FDEGRNDFEGETK             |               |
| 1957.9402                           | 1957.9503 | 5      | 447   | 463 | FFPASADRTVIDYNGER         |               |
| 1965.0439                           | 1965.045  | 1      | 233   | 249 | HNQLPLVIEFTEQTAPK         |               |
| 1965.0439                           | 1965.045  | 1      | 233   | 249 | HNQLPLVIEFTEQTAPK         |               |
| 2093.0508                           | 2093.0537 | 1      | 81    | 99  | LAKVDATEESDLAQYGVGR       |               |
| 2093.0508                           | 2093.0537 | 1      | 81    | 99  | LAKVDATEESDLAQYGVGR       |               |
| 2219.1013                           | 2219.1096 | 4      | 427   | 446 | MDSTANEVEAVKVSFPTLK       | Oxidation (M) |
| 2709.4609                           | 2709.3352 | -46    | 233   | 256 | HNQLPLVIEFTEQTAPKIFGGEIK  |               |
| 2752.415                            | 2752.3369 | -28    | 81    | 105 | LAKVDATEESDLAQYGVGRGYPTIK |               |

| Spot 180 (20070719-D21) P4hb, Pdia1 |           |        |       |     |                                          |               |
|-------------------------------------|-----------|--------|-------|-----|------------------------------------------|---------------|
| PMF/MALDI                           |           |        |       |     |                                          |               |
| Calculated                          | Observed  | +/-ppm | start | end | Sequence                                 | Ion Score     |
| 1001.5505                           | 1002.5637 | 6      | 72    | 80  | KLKAEGSEIR.L                             |               |
| 2092.0436                           | 2093.0566 | 3      | 81    | 99  | R.LAKVDATEESDLAQYGVGR.G                  |               |
| 1779.8275                           | 1780.838  | 2      | 84    | 99  | K.VDATEESDLAQYGVGR.G                     |               |
| 2439.1918                           | 2440.156  | -18    | 84    | 105 | K.VDATEESDLAQYGVGRGYPTIK.F               |               |
| 3715.7952                           | 3716.738  | -17    | 135   | 172 | R.TGPAATLSDTAAASLVDSSEVTYIGFFKDAQSDSAK.Q |               |
| 2683.3381                           | 2684.3135 | -12    | 173   | 197 | K.QFLAAEAVDDIPFGITSNSDVF.SK.Y            |               |
| 1423.7711                           | 1424.7665 | -8     | 198   | 209 | K.YQLDKDGVVLFK.K                         |               |
| 1654.7587                           | 1655.774  | 5      | 211   | 224 | K.FDEGRNDFEGETK.E                        |               |
| 1307.6357                           | 1308.6401 | -2     | 216   | 226 | R.NNDFEGETK.L                            |               |
| 1964.0367                           | 1965.0511 | 4      | 233   | 249 | K.HNQLPLVIEFTEQTAPK.I                    |               |
| 2708.4537                           | 2709.3306 | -48    | 233   | 256 | K.HNQLPLVIEFTEQTAPKIFGGEIK.T             |               |
| 1090.6695                           | 1081.6775 | 1      | 257   | 265 | K.THILLFLPK.S                            |               |
| 2018.0221                           | 2018.9983 | -15    | 266   | 302 | K.GKILFIDSDHTDNQR.I                      |               |
| 1832.9057                           | 1833.9185 | 3      | 268   | 302 | K.ILFIFIDSDHTDNQR.I                      |               |
| 965.5596                            | 966.5642  | -2     | 303   | 310 | R.ILEFFGLK.K                             |               |
| 1221.6162                           | 1222.6284 | 4      | 319   | 328 | R.LITLLEEMTK.Y                           | Oxidation (M) |
| 1408.6722                           | 1409.6929 | 10     | 329   | 340 | K.YKPESDELTAEK.I                         |               |
| 2453.2362                           | 2454.2554 | 5      | 353   | 372 | K.IKPHLMSQELPEDWDKQPVK.V                 | Oxidation (M) |
| 1226.5455                           | 1227.5577 | 4      | 378   | 387 | K.NFEEVAFDEK.K                           |               |
| 1354.6405                           | 1355.6542 | 5      | 378   | 388 | K.NFEEVAFDEK.N                           |               |
| 1728.9046                           | 1729.9224 | 6      | 412   | 426 | K.LGETYKDHENIVAK.M                       |               |
| 2218.094                            | 2219.1128 | 5      | 427   | 446 | K.MDSTANEVEAVKVSFPTLK.F                  | Oxidation (M) |
| 927.5178                            | 928.5508  | 28     | 439   | 446 | K.VHSFPTLK.F                             |               |
| 909.4345                            | 910.442   | 0      | 447   | 454 | K.FFPASADR.T                             |               |
| 1956.933                            | 1957.9537 | 7      | 447   | 463 | K.FFPASADRTVIDYNGER.T                    |               |
| 1065.5091                           | 1066.528  | 11     | 455   | 463 | R.TVIDYNGER.T                            |               |

# Spot 187 (D17 20070719) – Alpha-centractin (Actr1a)

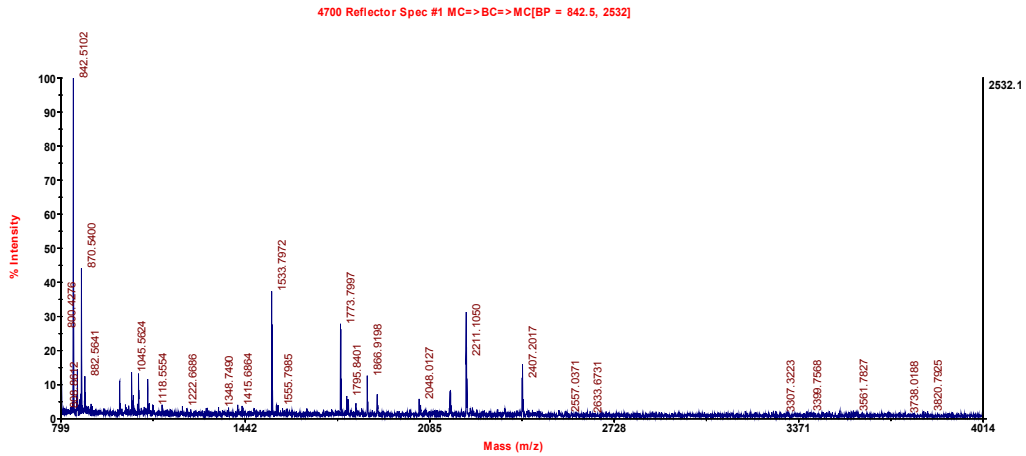

| Spot 187 (20070719-D17) Actr1a |           |        |       |     |                          |                 |
|--------------------------------|-----------|--------|-------|-----|--------------------------|-----------------|
| PMF/MALDI                      |           |        |       |     |                          |                 |
| Calculated                     | Observed  | +/-ppm | start | end | Sequence                 |                 |
| 1002.5134                      | 1003.5367 | 16     | 23    | 32  | K.AGFAGDQIPK.Y           |                 |
| 1532.7909                      | 1533.7972 | -1     | 47    | 61  | R.VMAGALEGDIFIGPK.A      | Oxidation (M)   |
| 2155.0732                      | 2156.1138 | 15     | 47    | 66  | R.VMAGALEGDIFIGPKAEEHR.G | Oxidation (M)   |
| 1088.5325                      | 1089.5431 | 3      | 73    | 81  | R.YPMEHGIVK.D            | Oxidation (M)   |
| 2050.8877                      | 2051.8726 | -11    | 73    | 88  | R.YPMEHGIVKDWNDMER.I     | 2 Oxidation (M) |
| 1100.5938                      | 1101.5892 | -11    | 183   | 192 | R.IDIAGRIVSR.F           |                 |
| 1900.8643                      | 1901.8918 | 0      | 200   | 215 | R.KEGYDFHSSSEFEIVK.A     |                 |
| 1772.7893                      | 1773.7997 | 2      | 201   | 215 | K.EGYDFHSSSEFEIVK.A      |                 |
| 1865.9159                      | 1866.9198 | -2     | 239   | 255 | K.AGYLPGSTIEIGPSR.F      |                 |
| 1068.604                       | 1069.6195 | 8      | 328   | 336 | K.IRISAPQER.L            |                 |
| 799.4188                       | 800.4276  | 2      | 330   | 336 | R.ISAPQER.L              |                 |

# Spot 188 (E1 20070719) – Proliferating cell nuclear antigen (Pcna)

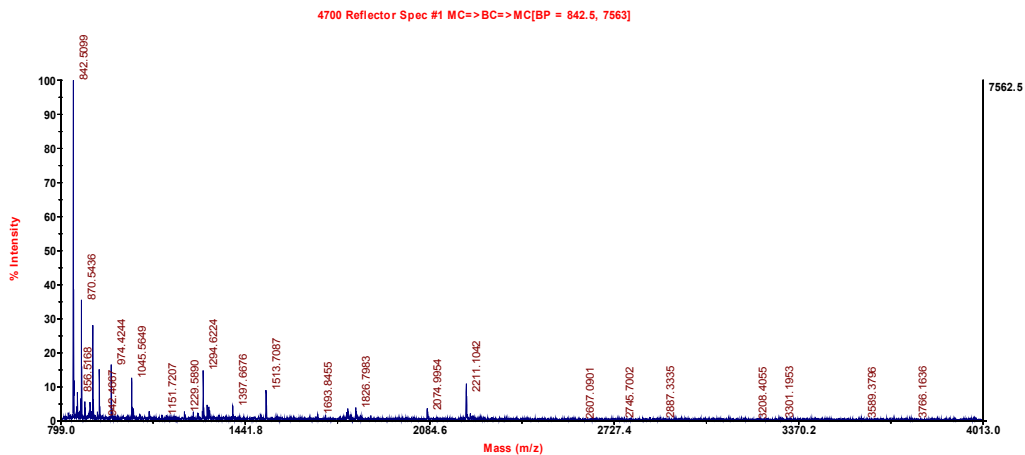

| Spot 188 (20070719.E1) Pcna |           |        |       |     |                     |           |                    |
|-----------------------------|-----------|--------|-------|-----|---------------------|-----------|--------------------|
| MS•MS/MS                    |           |        |       |     |                     |           |                    |
| Calculated                  | Observed  | +/-ppm | start | end | Sequence            | Ion Score | C.I.% Modification |
| 900.4607                    | 900.4645  | 4      | 241   | 248 | IADMGHLK            |           | Oxidation (M)      |
| 910.4067                    | 910.4077  | -1     | 139   | 146 | MPSGEFAR            |           | Oxidation (M)      |
| 910.4067                    | 910.4077  | -1     | 139   | 146 | MPSGEFAR            |           | Oxidation (M)      |
| 932.4875                    | 932.4891  | 2      | 211   | 217 | YLNFFTK             |           |                    |
| 932.4875                    | 932.4891  | 2      | 211   | 217 | YLNFFTK             | 27        | 99.792             |
| 974.4213                    | 974.4222  | 1      | 54    | 61  | SEGFDTYR            | 5         | 63.494             |
| 974.4213                    | 974.4222  | 1      | 54    | 61  | SEGFDTYR            |           |                    |
| 1293.6433                   | 1293.6249 | -14    | 169   | 181 | FSASGELGNGNIK       |           |                    |
| 1397.6763                   | 1397.6659 | -7     | 65    | 77  | NLAMGVNLTSMISK      |           | 2 Oxidation (M)    |
| 1513.7057                   | 1513.7073 | 1      | 249   | 261 | YYLAPKIEDEEGS       |           |                    |
| 1513.7057                   | 1513.7073 | 1      | 249   | 261 | YYLAPKIEDEEGS       | 0         | 0                  |
| 1719.9496                   | 1719.9065 | -25    | 65    | 80  | NLAMGVNLTSMISKILK   |           |                    |
| 2074.9927                   | 2074.991  | -1     | 92    | 110 | AEDNADTLALVFEAPNQEK | 14        | 95.988             |
| 2074.9927                   | 2074.991  | -1     | 92    | 110 | AEDNADTLALVFEAPNQEK |           |                    |

| Spot 188 (20070719.E1) Pcna |           |        |       |     |                         |           |                    |
|-----------------------------|-----------|--------|-------|-----|-------------------------|-----------|--------------------|
| PMF/MALDI                   |           |        |       |     |                         |           |                    |
| Calculated                  | Observed  | +/-ppm | start | end | Sequence                | Ion Score | C.I.% Modification |
| 973.4141                    | 974.4244  | 3      | 54    | 61  | R_SEGFDTYR_C            |           |                    |
| 1796.8219                   | 1797.8129 | -9     | 62    | 77  | R_CDRNLAMGVNLTSMISK_I   |           |                    |
| 1828.8117                   | 1829.8138 | -3     | 62    | 77  | R_CDRNLAMGVNLTSMISK_I   |           | 2 Oxidation (M)    |
| 1364.6792                   | 1365.6415 | -33    | 65    | 77  | R_NLAMGVNLTSMISK_I      |           |                    |
| 1396.669                    | 1397.6676 | -6     | 65    | 77  | R_NLAMGVNLTSMISK_I      |           | 2 Oxidation (M)    |
| 1718.9423                   | 1719.9095 | -23    | 65    | 80  | R_NLAMGVNLTSMISKILK_C   |           |                    |
| 2073.9854                   | 2074.9954 | 1      | 92    | 110 | R_AEDNADTLALVFEAPNQEK_V |           |                    |
| 893.4065                    | 894.4213  | 8      | 139   | 146 | K_MPSGEFAR_I            |           |                    |
| 909.4014                    | 910.4088  | 0      | 139   | 146 | K_MPSGEFAR_I            |           | Oxidation (M)      |
| 1292.6361                   | 1293.6304 | -10    | 169   | 181 | K_FSASGELGNGNIK_L       |           |                    |
| 931.4803                    | 932.4893  | 2      | 211   | 217 | R_YLNFFTK_A             |           |                    |
| 899.4535                    | 900.4644  | 4      | 241   | 248 | K_IADMGHLK_Y            |           | Oxidation (M)      |
| 1512.6984                   | 1513.7087 | 2      | 249   | 261 | K_YYLAPKIEDEEGS_-       |           |                    |

# Spot 192 (C10 20080606) - Mu-chrySTALLIN homolog (CryM)

SUB (4700 Reflector Spec #1 MC=>BC=>MC[BP = 842.5, 71155] , <<C1\_MS\_1>> 4700 Reflector Spec #1 MC=>BC=>MC[BP = 882.6, 67

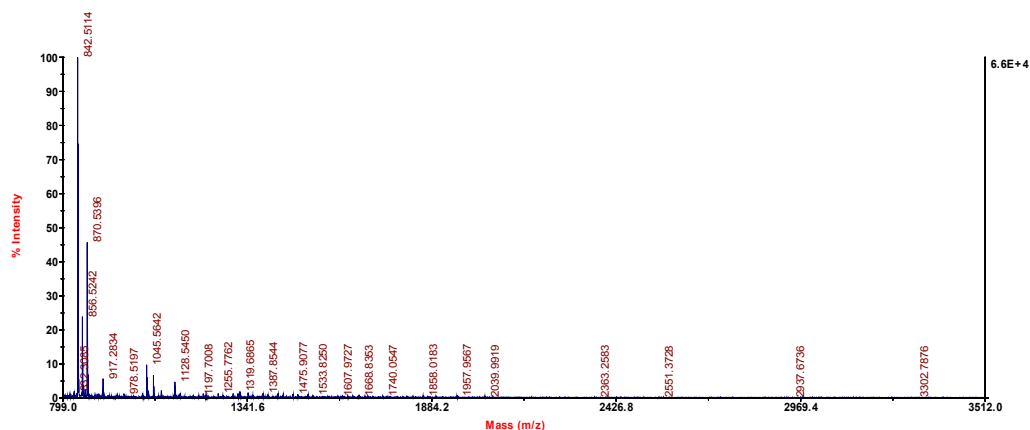

| Spot 192 (20080606-C10) Crym |           |        |       |     |                    |           |                    |
|------------------------------|-----------|--------|-------|-----|--------------------|-----------|--------------------|
| MS•MS/MS                     |           |        |       |     |                    |           |                    |
| Calculated                   | Observed  | +/-ppm | start | end | Sequence           | Ion Score | C.I.% Modification |
| 1050.5579                    | 1050.5555 | -2     | 242   | 250 | QAVLYVDSR          | 9         | 87.734             |
| 1050.5579                    | 1050.5555 | -2     | 242   | 250 | QAVLYVDSR          |           |                    |
| 1065.5323                    | 1065.5336 | 1      | 176   | 185 | FASSVQGDVR         |           |                    |
| 1065.5323                    | 1065.5336 | 1      | 176   | 185 | FASSVQGDVR         | 9         | 87.096             |
| 1088.6422                    | 1088.6429 | 1      | 118   | 128 | RTAAVSAIATK        |           |                    |
| 1088.6422                    | 1088.6429 | 1      | 118   | 128 | RTAAVSAIATK        |           |                    |
| 1128.5466                    | 1128.5472 | 1      | 37    | 47  | GPDGGVMQPVR        |           | Oxidation (M)      |
| 1128.5466                    | 1128.5472 | 1      | 37    | 47  | GPDGGVMQPVR        | 11        | 92.062             |
| 1141.5524                    | 1141.5577 | 5      | 304   | 313 | LVYDSWSSGK         |           |                    |
| 1319.6875                    | 1319.6869 | 0      | 291   | 303 | SLGMAVEDLVAAK      |           | Oxidation (M)      |
| 1319.6875                    | 1319.6869 | 0      | 291   | 303 | SLGMAVEDLVAAK      |           | Oxidation (M)      |
| 1636.7925                    | 1636.793  | 0      | 171   | 185 | ENAEKFASSVQGDVR    |           |                    |
| 1668.834                     | 1668.8275 | -4     | 4     | 18  | APAFLSADEVQDHLR    |           |                    |
| 1858.032                     | 1858.0294 | -1     | 19    | 36  | SSSLIPPLEAALANFSK  |           |                    |
| 1896.0146                    | 1895.9785 | -19    | 266   | 303 | TTVFKSLGMAVEDLVAAK |           | Oxidation (M)      |
| 1957.9575                    | 1957.9514 | -3     | 57    | 75  | GFLGVMPAYSAEDALTTK |           | Oxidation (M)      |
| 2039.9954                    | 2039.9926 | -1     | 234   | 250 | ELDDELMKQAVLYVDSR  |           | Oxidation (M)      |

| Spot 192 (20080606-C10) Crym |           |        |       |     |                        |           |                    |
|------------------------------|-----------|--------|-------|-----|------------------------|-----------|--------------------|
| PMF/MALDI                    |           |        |       |     |                        |           |                    |
| Calculated                   | Observed  | +/-ppm | start | end | Sequence               | Ion Score | C.I.% Modification |
| 1667.8267                    | 1668.8353 | 1      | 4     | 18  | R.APAFLSADEVQDHLR.S    |           |                    |
| 1857.0247                    | 1858.0183 | -7     | 19    | 36  | R.SSSLIPPLEAALANFSK.G  |           |                    |
| 1127.5394                    | 1128.545  | -1     | 37    | 47  | K.GPDGGVMQPVR.T        |           | Oxidation (M)      |
| 1956.9503                    | 1957.9567 | 0      | 57    | 75  | R.GFLGVMPAYSAEDALTTK.L |           | Oxidation (M)      |
| 1087.6349                    | 1088.6405 | -2     | 118   | 128 | K.RTAAVSAIATK.F        |           |                    |
| 931.5338                     | 932.5331  | -9     | 119   | 128 | R.TAAVSAIATK.F         |           |                    |
| 1635.7852                    | 1636.8014 | 5      | 171   | 185 | R.ENAEKFASSVQGDVR.V    |           |                    |
| 1064.5251                    | 1065.5341 | 2      | 176   | 185 | K.FASSVQGDVR.V         |           |                    |
| 2038.9881                    | 2039.9919 | -2     | 234   | 250 | R.ELDDELMKQAVLYVDSR.E  |           | Oxidation (M)      |
| 1049.5506                    | 1050.5554 | -2     | 242   | 250 | K.QAVLYVDSR.E          |           |                    |
| 1895.0074                    | 1895.9846 | -16    | 266   | 303 | K.TTVFKSLGMAVEDLVAAK.L |           | Oxidation (M)      |
| 1318.6802                    | 1319.6865 | -1     | 291   | 303 | K.SLGMAVEDLVAAK.L      |           | Oxidation (M)      |
| 1140.5451                    | 1141.5593 | 6      | 304   | 313 | K.LVYDSWSSGK.-         |           |                    |

## Spot 201 (C15 20080606) – Splicing factor 3a, subunit 3 [Mus musculus] (Sf3a3)

SUB (4700 Reflector Spec #1 MC=>BC=>MC[BP = 842.5, 58733] , <<C1\_MS\_1>> 4700 Reflector Spec #1 MC=>BC=>MC[BP = 882.6, 67

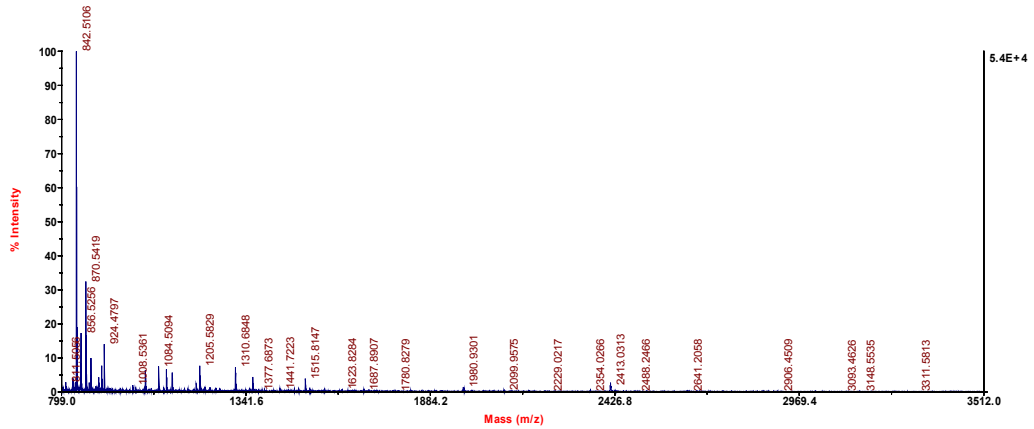

| Spot 201 (20080606-C15) Sf3a3 |           |        |       |     |                           |                 |
|-------------------------------|-----------|--------|-------|-----|---------------------------|-----------------|
| PMF/MALDI                     |           |        |       |     |                           |                 |
| Calculated                    | Observed  | +/-ppm | start | end | Sequence                  |                 |
| 1171.6309                     | 1172.6293 | -8     | 2     | 10  | M ETILEQORR.Y             |                 |
| 860.414                       | 861.4413  | 23     | 10    | 15  | R.RYHEEK.E                |                 |
| 838.3929                      | 839.3997  | 0      | 18    | 24  | R.LMDVMAK.E               |                 |
| 1440.7069                     | 1441.7223 | 6      | 31    | 42  | K.STLRDQINSDHR.T          | 2 Oxidation (M) |
| 1083.5019                     | 1084.5094 | 0      | 50    | 58  | R.YMEVSGNLR.D             | Oxidation (M)   |
| 1208.5673                     | 1209.5884 | 11     | 59    | 68  | R.DLYDDKGLR.K             |                 |
| 2098.9595                     | 2099.9575 | -4     | 70    | 87  | K.EELNAISGNPEFAEFYNR.L    |                 |
| 956.5192                      | 957.53    | 4      | 90    | 96  | K.QIKFHR.K                |                 |
| 2412.0353                     | 2413.0312 | -5     | 118   | 138 | R.ENPSEEAQNLFVFTDEEGYGR.Y |                 |
| 1979.9186                     | 1980.9301 | 2      | 185   | 199 | R.YLEMMLLEYLDYDTR.V       | Oxidation (M)   |
| 1514.8093                     | 1515.8147 | -1     | 200   | 212 | R.VKPLDQGNELFGK.I         |                 |
| 879.4338                      | 880.4443  | 4      | 213   | 219 | K.IQTFEKK.K               |                 |
| 1007.5267                     | 1008.5361 | 0      | 213   | 220 | K.IQTFEKK.W               |                 |
| 884.5695                      | 885.5754  | -1     | 265   | 273 | K.SALLALGLK.C             |                 |
| 1494.793                      | 1495.7976 | -2     | 290   | 303 | K.GKSLDLSLFAK.N           |                 |
| 1309.6765                     | 1310.6848 | 1      | 292   | 303 | K.SLESLSLFAK.N            |                 |
| 1123.5734                     | 1124.5802 | 0      | 339   | 347 | R.QLTHENVGR.K             |                 |
| 1251.6664                     | 1252.6731 | -2     | 339   | 348 | R.QLTHENVGRK.Q            |                 |
| 802.445                       | 803.4521  | 0      | 418   | 424 | R.GPKAFQR.H               |                 |
| 644.398                       | 645.4119  | 8      | 425   | 430 | R.HFAEWR.H                |                 |
| 2353.0346                     | 2354.0266 | -6     | 471   | 480 | R.WQPDTEEEYEDSSGNVNIKK.T  |                 |
| 923.4712                      | 924.4797  | 1      | 491   | 497 | K.TYEDLKR.Q               |                 |

## Spot 201 (D7 20070719) – Heterogeneous nuclear ribonucleoprotein K (Hnrnpk)

4700 Reflector Spec #1 MC=>BC=>MC[BP = 1194.5, 17257]

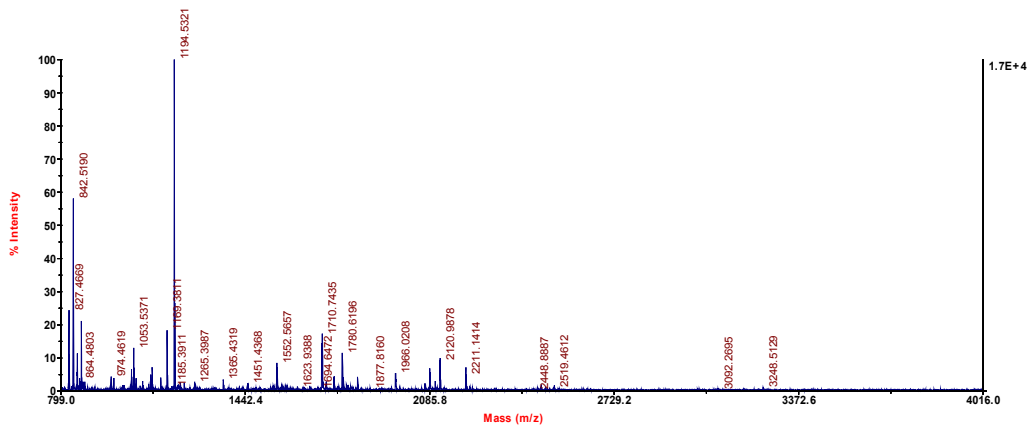

| Spot 201 (20070719-D7) Hnmpk |           |        |       |     |                    |           |        |                 |  |
|------------------------------|-----------|--------|-------|-----|--------------------|-----------|--------|-----------------|--|
| MS•MS/MS                     |           |        |       |     |                    |           |        |                 |  |
| Calculated                   | Observed  | +/-ppm | start | end | Sequence           | Ion Score | C.I.%  | Modification    |  |
| 876.4249                     | 876.4186  | -7     | 457   | 463 | QYSGKFF            |           |        |                 |  |
| 1013.4356                    | 1013.4648 | 29     | 317   | 325 | GGDLMAYDR          |           |        | Oxidation (M)   |  |
| 1014.3832                    | 1014.4172 | 34     | 279   | 286 | DYDDMSPR           |           |        | Oxidation (M)   |  |
| 1053.6415                    | 1053.652  | 10     | 192   | 201 | VVLIGGKPR          |           |        |                 |  |
| 1053.6415                    | 1053.652  | 10     | 192   | 201 | VVLIGGKPR          |           |        |                 |  |
| 1105.5208                    | 1105.5552 | 31     | 259   | 268 | GGFDRMPPGR         |           |        | Oxidation (M)   |  |
| 1169.5367                    | 1169.5696 | 28     | 317   | 326 | GGDLMAYDRR         | 11        | 96.09  | Oxidation (M)   |  |
| 1169.5367                    | 1169.5696 | 28     | 317   | 326 | GGDLMAYDRR         |           |        |                 |  |
| 1194.6993                    | 1194.735  | 30     | 306   | 316 | NLPLPPPPPR         |           |        |                 |  |
| 1194.6993                    | 1194.735  | 30     | 306   | 316 | NLPLPPPPPR         | 49        | 99.999 |                 |  |
| 1229.6683                    | 1229.6609 | -6     | 248   | 258 | GRPVGFPMRGR        |           |        |                 |  |
| 2121.9653                    | 2121.8572 | -46    | 269   | 286 | GGRPMPSSRRDYDDMSPR |           |        | 2 Oxidation (M) |  |
| 2121.9653                    | 2121.8572 | -46    | 269   | 286 | GGRPMPSSRRDYDDMSPR |           |        | 2 Oxidation (M) |  |

# Spot 213 (D6 20070719) – Succinate dehydrogenase [ubiquinone] flavoprotein subunit, mitochondrial precursor (Sdha)

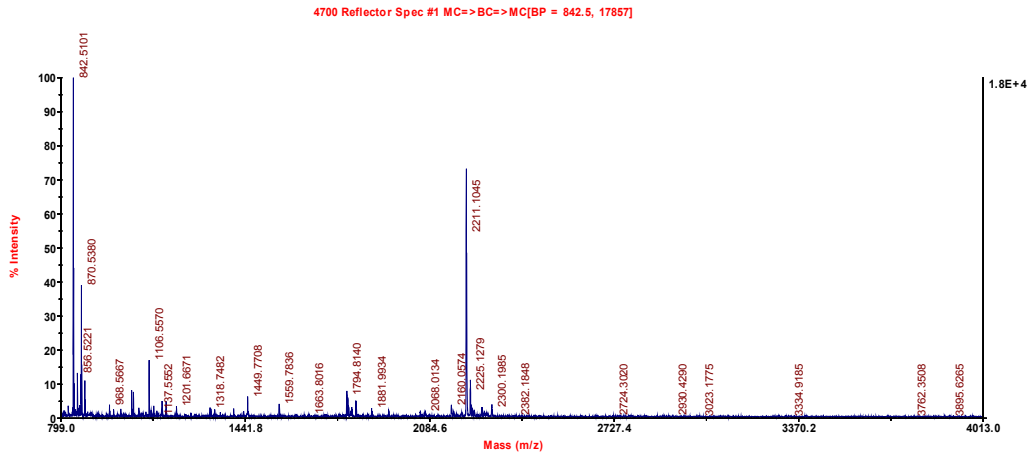

| Spot 213 (20070719.D6) Sdha |           |        |       |     |                          |                 |
|-----------------------------|-----------|--------|-------|-----|--------------------------|-----------------|
| PMF/MALDI                   |           |        |       |     |                          |                 |
| Calculated                  | Observed  | +/-ppm | start | end | Sequence                 |                 |
| 1094.5185                   | 1095.5420 | 16     | 113   | 120 | R.VHWFYDTVK.G            |                 |
| 1136.5574                   | 1137.5552 | -8     | 155   | 163 | R.TEDGRIYQR.A            |                 |
| 2277.9929                   | 2279.0176 | 8      | 181   | 199 | R.CCCVADRTGHSLLHTLYGR.S  |                 |
| 1353.7153                   | 1354.7296 | 5      | 188   | 199 | R.TGHSLLHTLYGR.S         |                 |
| 1320.715                    | 1321.7206 | -1     | 241   | 253 | R.AKNTIATGGYGR.T         |                 |
| 1121.5829                   | 1122.583  | -6     | 243   | 253 | K.NTIATGGYGR.T           |                 |
| 2250.9522                   | 2252.063  | 46     | 254   | 274 | R.TYFSCTSHTSTGDGTAMVTR.A |                 |
| 1645.8093                   | 1646.8055 | -7     | 478   | 492 | K.ANAGEESVMNLDKLR.F      |                 |
| 1661.8042                   | 1662.8225 | 7      | 478   | 492 | K.ANAGEESVMNLDKLR.F      | Oxidation (M)   |
| 1751.8447                   | 1752.8514 | 0      | 505   | 519 | R.LSMGKSMQSHAAVFR.V      | 2 Oxidation (M) |
| 1148.5397                   | 1149.5619 | 13     | 510   | 519 | K.SMGSHAAVFR.V           | Oxidation (M)   |
| 1399.746                    | 1400.7614 | 6      | 531   | 542 | K.VSQLYGDQLHLK.T         |                 |
| 2067.0273                   | 2068.0134 | -10    | 591   | 607 | K.VRIDEYDYSKPIEGGQK.K    |                 |
| 1811.8577                   | 1812.8661 | 1      | 593   | 607 | R.IDEYDYSKPIEGGQK.K      |                 |
| 1069.5457                   | 1070.5603 | 7      | 608   | 615 | K.KPFAEHWK.K             |                 |
| 1197.6407                   | 1198.6654 | 15     | 608   | 616 | K.KPFAEHWK.H             |                 |
| 1317.7292                   | 1318.7462 | 9      | 629   | 639 | K.VTLDIRPVVDK.T          |                 |



# Spot 218 (D1 20080606) – mixture of: 14-3-3 zeta/delta (Ywhaz) and 14-3-3 protein gamma (Ywhag)

SUB (4700 Reflector Spec #1 MC=>BC=>MC[BP = 1548.7, 10727] , <<C1\_MS\_1>> 4700 Reflector Spec #1 MC=>BC=>MC[BP = 882.6, 6

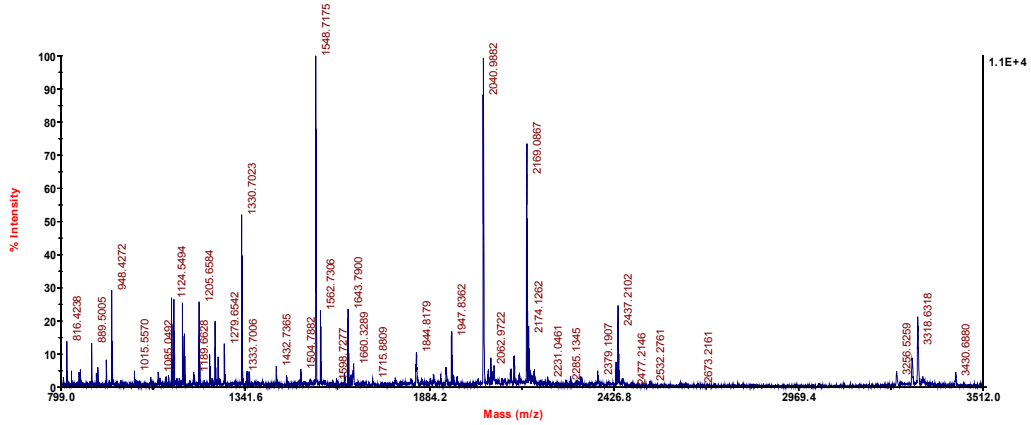

| Spot 218 (20080606-D1) Ywhaz |           |        |       |     |                                   |                 |
|------------------------------|-----------|--------|-------|-----|-----------------------------------|-----------------|
| PMF/MALDI                    |           |        |       |     |                                   |                 |
| Calculated                   | Observed  | +/-ppm | start | end | Sequence                          | Ion Score       |
| 1014.5458                    | 1015.557  | 4      | 10    | 18  | K.AKLAEQAER.Y                     |                 |
| 815.4137                     | 816.4238  | 4      | 12    | 18  | K.LAEQAER.Y                       |                 |
| 1933.7856                    | 1934.8495 | 29     | 12    | 27  | K.LAEQAERYDDMAACMK.S              | 2 Oxidation (M) |
| 1547.7063                    | 1548.7175 | 3      | 28    | 41  | K.SVTEGGAELSNEER.N                |                 |
| 2436.2132                    | 2437.2102 | -4     | 28    | 49  | K.SVTEGGAELSNEERNLLSVAYK.N        |                 |
| 906.5174                     | 907.5287  | 4      | 42    | 49  | R.NLLSVAYK.N                      |                 |
| 888.4916                     | 889.5005  | 2      | 61    | 68  | R.VVSSIEQK.T                      |                 |
| 1503.778                     | 1504.7882 | 2      | 61    | 74  | R.VVSSIEQKTEGAEK.K                |                 |
| 1631.873                     | 1632.8796 | 0      | 61    | 75  | R.VVSSIEQKTEGAEKK.Q               |                 |
| 1329.6928                    | 1330.7023 | 2      | 104   | 115 | K.FLIPNASQPESK.V                  |                 |
| 1597.7963                    | 1598.7277 | -47    | 116   | 127 | K.VFYLMKMGDYR.Y                   | Oxidation (M)   |
| 931.4222                     | 932.4315  | 2      | 121   | 127 | K.MKGDYR.Y                        |                 |
| 947.4171                     | 948.4272  | 3      | 121   | 127 | K.MKGDYR.Y                        | Oxidation (M)   |
| 1278.6456                    | 1279.6542 | 1      | 128   | 139 | R.YLAEVAAGDDKK.G                  |                 |
| 3300.615                     | 3301.5815 | -12    | 128   | 157 | R.YLAEVAAGDDKKGVDQSQQAYQEAFEISK.K |                 |
| 2296.1699                    | 2297.1646 | -5     | 139   | 158 | K.KGVDQSQQAYQEAFEISK.K            |                 |
| 2039.98                      | 2040.9862 | 0      | 140   | 157 | K.GVDQSQQAYQEAFEISK.K             |                 |
| 2168.0749                    | 2169.0867 | 2      | 140   | 158 | K.GVDQSQQAYQEAFEISK.K             |                 |
| 1235.6445                    | 1236.6598 | 7      | 158   | 167 | K.KEMQTPHIR.L                     |                 |
| 1251.6394                    | 1252.6476 | 1      | 158   | 167 | K.KEMQTPHIR.L                     | Oxidation (M)   |
| 1107.5495                    | 1108.5632 | 6      | 159   | 167 | K.KEMQTPHIR.L                     |                 |
| 1123.5444                    | 1124.5494 | -2     | 159   | 167 | K.KEMQTPHIR.L                     | Oxidation (M)   |
| 2316.2041                    | 2317.189  | -10    | 168   | 187 | R.LGLALNFSVFYIEILNSPEK.A          |                 |
| 2130.9844                    | 2131.9812 | -5     | 194   | 212 | K.TAFDDAJAELDTLSEESYK.D           |                 |
| 3317.6224                    | 3318.6318 | 1      | 194   | 222 | K.TAFDDAJAELDTLSEESYKDSTLMQLLR.D  | Oxidation (M)   |
| 1188.6536                    | 1189.6628 | 2      | 213   | 222 | K.DSTLMQLLR.D                     |                 |
| 1204.6485                    | 1205.6584 | 2      | 213   | 222 | K.DSTLMQLLR.D                     | Oxidation (M)   |

| Spot 218 (20080606-D1) Ywhag |           |        |       |     |                                  |                 |
|------------------------------|-----------|--------|-------|-----|----------------------------------|-----------------|
| PMF/MALDI                    |           |        |       |     |                                  |                 |
| Calculated                   | Observed  | +/-ppm | start | end | Sequence                         | Ion Score       |
| 815.4137                     | 816.4238  | 4      | 13    | 19  | R.LAEQAER.Y                      |                 |
| 1843.808                     | 1844.8179 | 1      | 13    | 26  | R.LAEQAERYDDMAAAMK.N             | 2 Oxidation (M) |
| 1642.7798                    | 1643.79   | 2      | 29    | 42  | K.NVTELNEPLSNEER.N               |                 |
| 2531.2867                    | 2532.2761 | -7     | 29    | 50  | K.NVTELNEPLSNEERNLLSVAYK.N       |                 |
| 906.5174                     | 907.5287  | 4      | 43    | 50  | R.NLLSVAYK.N                     |                 |
| 902.5073                     | 903.5107  | -4     | 62    | 69  | R.VVSSIEQK.T                     |                 |
| 1597.7963                    | 1598.7277 | -47    | 121   | 132 | K.VFYLMKMGDYR.Y                  | Oxidation (M)   |
| 931.4222                     | 932.4315  | 2      | 126   | 132 | K.MKGDYR.Y                       |                 |
| 947.4171                     | 948.4272  | 3      | 126   | 132 | K.MKGDYR.Y                       | Oxidation (M)   |
| 1235.651                     | 1236.6598 | 1      | 133   | 143 | R.YLAEVATGEK.R.A                 |                 |
| 2376.128                     | 2377.187  | 22     | 153   | 172 | K.AYSEAEHSEKHEMQTPHIR.L          | Oxidation (M)   |
| 1260.6033                    | 1261.6112 | 0      | 163   | 172 | K.EHMQTPHIR.L                    | Oxidation (M)   |
| 2129.9641                    | 2130.9656 | -3     | 199   | 217 | K.TAFDDAJAELDTLNEDSYK.D          |                 |
| 3300.6071                    | 3301.5815 | -10    | 199   | 227 | K.TAFDDAJAELDTLNEDSYKDSTLMQLLR.D |                 |
| 3316.602                     | 3317.5806 | -9     | 199   | 227 | K.TAFDDAJAELDTLNEDSYKDSTLMQLLR.D | Oxidation (M)   |
| 1188.6536                    | 1189.6628 | 2      | 218   | 227 | K.DSTLMQLLR.D                    |                 |
| 1204.6485                    | 1205.6584 | 2      | 218   | 227 | K.DSTLMQLLR.D                    | Oxidation (M)   |

# Spot 240 (C23 20080606) - 14-3-3 protein epsilon (Ywhae)

SUB (4700 Reflector Spec #1 MC=>BC=>MC[BP = 1540.7, 18697] , <<C1\_MS\_1>> 4700 Reflector Spec #1 MC=>BC=>MC[BP = 882.6, 6

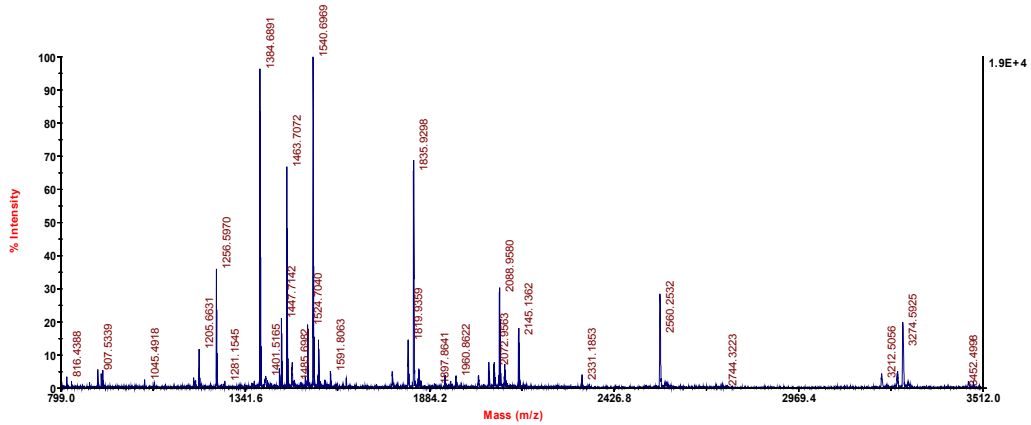

| Spot 240 (20080606.C23) Ywhae |           |        |       |     |                                |           |       |                 |  |
|-------------------------------|-----------|--------|-------|-----|--------------------------------|-----------|-------|-----------------|--|
| PMF/MALDI                     |           |        |       |     |                                |           |       |                 |  |
| Calculated                    | Observed  | +/-ppm | start | end | Sequence                       | Ion Score | C.I.% | Modification    |  |
| 815.4137                      | 816.4388  | 22     | 13    | 19  | K.LAEQAERY                     |           |       |                 |  |
| 1927.8655                     | 1928.8673 | -3     | 13    | 26  | K.LAEQAERYDEMVESMK             |           |       | Oxidation (M)   |  |
| 1943.8604                     | 1944.8766 | 5      | 13    | 26  | K.LAEQAERYDEMVESMK             |           |       | Oxidation (M)   |  |
| 1959.8553                     | 1960.8622 | 0      | 13    | 26  | K.LAEQAERYDEMVESMK             |           |       | 2 Oxidation (M) |  |
| 1574.7974                     | 1575.8132 | 5      | 29    | 42  | K.KVAGMDVELTVEER               |           |       |                 |  |
| 1590.7923                     | 1591.8063 | 4      | 29    | 42  | K.KVAGMDVELTVEER               |           |       | Oxidation (M)   |  |
| 1446.7024                     | 1447.7142 | 3      | 30    | 42  | K.VAGMDVELTVEER                |           |       |                 |  |
| 1462.6974                     | 1463.7072 | 2      | 30    | 42  | K.VAGMDVELTVEER                |           |       | Oxidation (M)   |  |
| 906.5174                      | 907.5339  | 10     | 43    | 50  | R.NLLSVAYK                     |           |       |                 |  |
| 1516.8725                     | 1517.8828 | 2      | 43    | 56  | R.NLLSVAYKNVIGAR               |           |       |                 |  |
| 916.5229                      | 917.5478  | 19     | 62    | 69  | R.IISIEQIK                     |           |       |                 |  |
| 882.4381                      | 883.4578  | 14     | 81    | 86  | K.MIREYR                       |           |       | Oxidation (M)   |  |
| 1440.6918                     | 1441.7024 | 2      | 84    | 94  | R.EYRQMVETELK                  |           |       | Oxidation (M)   |  |
| 1937.0047                     | 1938.0088 | -2     | 107   | 123 | K.HLPAANTGESKVFYYK             |           |       |                 |  |
| 905.4178                      | 906.4367  | 13     | 124   | 130 | K.MKGDYHR                      |           |       |                 |  |
| 921.4127                      | 922.4326  | 14     | 124   | 130 | K.MKGDYHR                      |           |       | Oxidation (M)   |  |
| 1255.5833                     | 1256.597  | 5      | 131   | 141 | R.YLAEFATGNDR                  |           |       |                 |  |
| 1383.6783                     | 1384.6891 | 3      | 131   | 142 | R.YLAEFATGNDR                  |           |       |                 |  |
| 1193.5928                     | 1194.6115 | 10     | 143   | 153 | K.EAAENSLVAYK                  |           |       |                 |  |
| 1818.9298                     | 1819.9359 | -1     | 154   | 170 | K.AASDIAMTELPPTHPIR            |           |       |                 |  |
| 1834.9247                     | 1835.9298 | -1     | 154   | 170 | K.AASDIAMTELPPTHPIR            |           |       | Oxidation (M)   |  |
| 2330.1947                     | 2331.1853 | -7     | 171   | 190 | R.LGLALNFSVFYYEILNSPDR         |           |       |                 |  |
| 2086.9582                     | 2087.9653 | 0      | 187   | 215 | K.AAFDDAJAELDTLSEESYK          |           |       |                 |  |
| 3257.6013                     | 3258.5818 | -8     | 197   | 225 | K.AAFDDAJAELDTLSEESYK          |           |       |                 |  |
| 3273.6962                     | 3274.6925 | -3     | 197   | 225 | K.AAFDDAJAELDTLSEESYK          |           |       | Oxidation (M)   |  |
| 1188.8636                     | 1189.865  | 3      | 216   | 225 | K.DSTLMQLLR                    |           |       |                 |  |
| 1204.6485                     | 1205.6631 | 6      | 216   | 225 | K.DSTLMQLLR                    |           |       | Oxidation (M)   |  |
| 3466.459                      | 3467.4968 | 9      | 226   | 255 | R.DNLTWTSDMQGDGEONKEALQDVEDENQ |           |       | Oxidation (M)   |  |

| Spot 240 (P1014-05) Ywhae |          |                                                                   |                         |                   |                      |                        |               |                 |                           |              |                     |
|---------------------------|----------|-------------------------------------------------------------------|-------------------------|-------------------|----------------------|------------------------|---------------|-----------------|---------------------------|--------------|---------------------|
| LCMS/MS (Scaffold)        |          |                                                                   |                         |                   |                      |                        |               |                 |                           |              |                     |
| Sample Name               | Acc. No. | Proteins(s) inferred                                              | No. Peptides identified | Sequence Coverage | Position in sequence | Peptide Sequence       | Precursor m/z | Charge observed | Calculated mass (neutral) | Mascot score | Mascot Expect value |
| P1014-05                  | P62260   | sj P62260 14-3-3 protein epsilon Tax_id=10116 [Rattus norvegicus] | 9                       | 32.50%            | 87 - 94              | (R)QMVETELK(L)         | 489.16        | 2               | 976.30                    | 54.9         | 1.55E-002           |
|                           |          |                                                                   |                         |                   | 143 - 153            | (K)EAAENSLVAYK(A)      | 597.68        | 2               | 1193.35                   | 60.6         | 3.62E-003           |
|                           |          |                                                                   |                         |                   | 131 - 141            | (R)YLAEFATGNDR(K)      | 629.08        | 2               | 1256.15                   | 51.9         | 2.62E-002           |
|                           |          |                                                                   |                         |                   | 245 - 255            | (K)EALQDVEDENQ(C)      | 645.08        | 2               | 1288.15                   | 72.4         | 2.39E-004           |
|                           |          |                                                                   |                         |                   | 13 - 28              | (K)LAEQAERYDEMVESMK(K) | 648.86        | 3               | 1943.56                   | 44.6         | 1.35E-001           |
|                           |          |                                                                   |                         |                   | 13 - 29              | (K)LAEQAERYDEMVESMK(V) | 686.82        | 3               | 2057.43                   | 58.0         | 6.29E-003           |
|                           |          |                                                                   |                         |                   | 30 - 42              | (K)VAGMDVELTVEER(N)    | 732.20        | 2               | 1462.39                   | 70.6         | 3.30E-004           |
|                           |          |                                                                   |                         |                   | 1 - 12               | (m)DDREDLVYQAK(L)      | 762.70        | 2               | 1523.39                   | 52.0         | 2.34E-002           |
|                           |          |                                                                   |                         |                   | 13 - 28              | (K)LAEQAERYDEMVESMK(K) | 964.76        | 2               | 1927.50                   | 66.8         | 6.59E-003           |

| Spot 240 [P1014-05 (75062 Rodent)] Ywhae |          |        |       |     |                             |           |        |                                        |  |
|------------------------------------------|----------|--------|-------|-----|-----------------------------|-----------|--------|----------------------------------------|--|
| LCMS/MS                                  |          |        |       |     |                             |           |        |                                        |  |
| Calculated                               | Observed | +/-ppm | start | end | Sequence                    | Ion Score | C.I. % | Modification                           |  |
| 1523.6926                                | 762.6622 |        | 1     | 12  | -.MDDRRELVYQAK.L            | 39        |        | Acetyl (Protein N-term)                |  |
| 1523.6926                                | 762.7012 |        | 1     | 12  | -.MDDRRELVYQAK.L            | 52        |        | Acetyl (Protein N-term)                |  |
| 1523.6926                                | 762.7227 |        | 1     | 12  | -.MDDRRELVYQAK.L            | 49        |        | Acetyl (Protein N-term)                |  |
| 1523.6926                                | 762.7391 |        | 1     | 12  | -.MDDRRELVYQAK.L            | 47        |        | Acetyl (Protein N-term)                |  |
| 1523.6926                                | 763.1816 |        | 1     | 12  | -.MDDRRELVYQAK.L            | 37        |        | Acetyl (Protein N-term)                |  |
| 1539.6875                                | 770.1812 |        | 1     | 12  | -.MDDRRELVYQAK.L            | 19        |        | Acetyl (Protein N-term); Oxidation (M) |  |
| 1539.6875                                | 513.9822 |        | 1     | 12  | -.MDDRRELVYQAK.L            | 29        |        | Acetyl (Protein N-term); Oxidation (M) |  |
| 1539.6875                                | 770.6812 |        | 1     | 12  | -.MDDRRELVYQAK.L            | 26        |        | Acetyl (Protein N-term); Oxidation (M) |  |
| 1539.6875                                | 771.1996 |        | 1     | 12  | -.MDDRRELVYQAK.L            | 25        |        | Acetyl (Protein N-term); Oxidation (M) |  |
| 1927.8655                                | 964.7587 |        | 13    | 26  | K.LAEQAERYDEMVESMK.K        | 57        |        |                                        |  |
| 1927.8655                                | 964.8182 |        | 13    | 26  | K.LAEQAERYDEMVESMK.K        | 49        |        |                                        |  |
| 1927.8655                                | 643.8385 |        | 13    | 26  | K.LAEQAERYDEMVESMK.K        | 35        |        |                                        |  |
| 1943.8604                                | 646.8605 |        | 13    | 26  | K.LAEQAERYDEMVESMK.K        | 45        |        | Oxidation (M)                          |  |
| 1959.8553                                | 654.1422 |        | 13    | 26  | K.LAEQAERYDEMVESMK.K        | 8         |        | 2 Oxidation (M)                        |  |
| 2055.9605                                | 514.9177 |        | 13    | 29  | K.LAEQAERYDEMVESMK.K.V      | 35        |        |                                        |  |
| 2055.9605                                | 686.5392 |        | 13    | 29  | K.LAEQAERYDEMVESMK.K.V      | 47        |        |                                        |  |
| 2055.9605                                | 686.8182 |        | 13    | 29  | K.LAEQAERYDEMVESMK.K.V      | 58        |        |                                        |  |
| 2071.9554                                | 691.8405 |        | 13    | 29  | K.LAEQAERYDEMVESMK.K.V      | 32        |        | Oxidation (M)                          |  |
| 1462.6974                                | 732.1996 |        | 30    | 42  | K.VAGMDVELTVEER.N           | 71        |        | Oxidation (M)                          |  |
| 906.5174                                 | 454.1381 |        | 43    | 50  | R.NLLSVAYK.N                | 35        |        |                                        |  |
| 1516.8725                                | 506.8195 |        | 43    | 56  | R.NLLSVAYKNVIGAR.R          | 16        |        |                                        |  |
| 2144.1324                                | 715.6212 |        | 62    | 80  | R.IISSIEQKEENKGGEDKLIK.M    | 54        |        |                                        |  |
| 976.4899                                 | 489.1581 |        | 87    | 94  | R.QMVTETLK.L                | 55        |        |                                        |  |
| 992.4848                                 | 497.1021 |        | 87    | 94  | R.QMVTETLK.L                | 36        |        | Oxidation (M)                          |  |
| 992.4848                                 | 497.6016 |        | 87    | 94  | R.QMVTETLK.L                | 25        |        | Oxidation (M)                          |  |
| 718.369                                  | 719.22   |        | 119   | 123 | K.VFYFK.M                   | 17        |        |                                        |  |
| 1255.5833                                | 629.0812 |        | 131   | 141 | R.YLAEFATGNDR.K             | 52        |        |                                        |  |
| 2559.2605                                | 854.2411 |        | 131   | 153 | R.YLAEFATGNDRKEAAENSLVAYK.A | 31        |        |                                        |  |
| 1193.5928                                | 597.6797 |        | 143   | 153 | K.EAAENSLVAYK.A             | 61        |        |                                        |  |
| 1193.5928                                | 598.1376 |        | 143   | 153 | K.EAAENSLVAYK.A             | 36        |        |                                        |  |
| 1193.5928                                | 598.1581 |        | 143   | 153 | K.EAAENSLVAYK.A             | 30        |        |                                        |  |
| 1834.9247                                | 612.5002 |        | 154   | 170 | K.AASDIAMTELPPTHPIR.L       | 19        |        | Oxidation (M)                          |  |
| 1288.5419                                | 645.0402 |        | 245   | 255 | K.EALQDVEDENG.-             | 13        |        |                                        |  |
| 1288.5419                                | 645.0812 |        | 245   | 255 | K.EALQDVEDENG.-             | 72        |        |                                        |  |

# Spot 242 (C5 20080606) – mixture of: F-actin-capping protein subunit alpha-2 (Capza2) and F-actin capping protein alpha-1 subunit (Capza1)

SUB (4700 Reflector Spec #1 MC=>BC=>MC[BP = 842.5, 69684] , <<C1\_MS\_1>> 4700 Reflector Spec #1 MC=>BC=>MC[BP = 882.6, 67

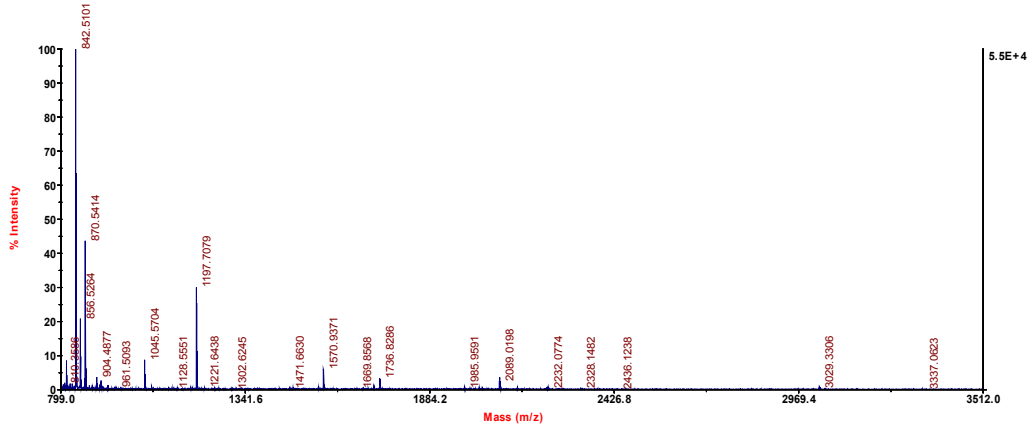

| Spot 242 (20080606-C5) Capza2 |           |        |       |     |                   |           |
|-------------------------------|-----------|--------|-------|-----|-------------------|-----------|
| MS+MS/MS                      |           |        |       |     |                   |           |
| Calculated                    | Observed  | +/-ppm | start | end | Sequence          | Ion Score |
| 815.4522                      | 815.4528  | 1      | 98    | 103 | FDHLRK            | 15        |
| 815.4522                      | 815.4528  | 1      | 98    | 103 | FDHLRK            | 97.303    |
| 869.5315                      | 869.5419  | 12     | 260   | 266 | RQLPVTR           |           |
| 904.4886                      | 904.488   | -1     | 267   | 273 | TKIDWNIK          | 12        |
| 904.4886                      | 904.488   | -1     | 267   | 273 | TKIDWNIK          | 94.884    |
| 906.4349                      | 906.4688  | 37     | 279   | 286 | IGKEMQNA          |           |
| 1197.6949                     | 1197.7072 | 10     | 38    | 47  | LLLNNDLLR         | 73        |
| 1197.6949                     | 1197.7072 | 10     | 38    | 47  | LLLNNDLLR         | 100       |
| 2029.0138                     | 2029.0148 | 0      | 194   | 210 | IQVHYVEDGNVQLVSHK |           |

| Spot 242 (20080606-C5) Capza2 |           |        |       |     |                       |           |
|-------------------------------|-----------|--------|-------|-----|-----------------------|-----------|
| PMF/MALDI                     |           |        |       |     |                       |           |
| Calculated                    | Observed  | +/-ppm | start | end | Sequence              | Ion Score |
| 1196.6877                     | 1197.7079 | 11     | 38    | 47  | R.LLLNNDLLR.E         |           |
| 814.445                       | 815.4535  | 2      | 98    | 103 | K.FDHLR.K.E           |           |
| 1984.9353                     | 1985.9591 | 8      | 130   | 146 | R.AYVKEHYPNGVCTVYGK.K |           |
| 890.4399                      | 891.4515  | 5      | 173   | 178 | R.WRSEWKF             |           |
| 2028.0065                     | 2029.0139 | 0      | 194   | 210 | K.IQVHYVEDGNVQLVSHK.D |           |
| 868.5243                      | 869.5349  | 4      | 260   | 266 | R.RQLPVTR.T           |           |
| 903.4814                      | 904.4877  | -1     | 267   | 273 | R.TKIDWNIK.I          |           |
| 905.4276                      | 906.4713  | 40     | 279   | 286 | K.IGKEMQNA.-          |           |

| Spot 242 (20080606-C5) Capza1 |           |        |       |     |                               |           |
|-------------------------------|-----------|--------|-------|-----|-------------------------------|-----------|
| PMF/MALDI                     |           |        |       |     |                               |           |
| Calculated                    | Observed  | +/-ppm | start | end | Sequence                      | Ion Score |
| 900.4876                      | 961.5093  | 15     | 8     | 15  | R.VSDEEK.VR.I                 |           |
| 2088.0065                     | 2089.0198 | 3      | 20    | 37  | K.FITHAPPGEFNEVFNDVRL         |           |
| 1196.6877                     | 1197.7079 | 11     | 38    | 47  | R.LLLNNDLLR.E                 |           |
| 2139.9664                     | 2140.9941 | 9      | 48    | 66  | R.EGAAHAFAGYINMDQFTPVK.I      |           |
| 2230.0502                     | 2231.0654 | 4      | 67    | 86  | K.IEGYDDGVLITEHGDGNSR.F       |           |
| 814.445                       | 815.4535  | 2      | 98    | 103 | K.FDHLR.K.E                   |           |
| 1565.7002                     | 1566.7272 | 13     | 104   | 118 | K.EASDPQPEDVDGGLK.S           |           |
| 1984.9126                     | 1985.9591 | 20     | 104   | 121 | K.EASDPQPEDVDGGLK.SWR.D       |           |
| 890.4399                      | 891.4515  | 5      | 173   | 178 | R.WRSEWKF                     |           |
| 1569.9131                     | 1570.9371 | 11     | 179   | 193 | K.FTITPPTAGVGVK.I             |           |
| 2028.0065                     | 2029.0139 | 0      | 194   | 210 | K.IQVHYVEDGNVQLVSHK.D         |           |
| 1718.8323                     | 1719.8634 | 8      | 211   | 226 | K.DVDSVTYSNEVQTAK.E           |           |
| 3028.3495                     | 3029.3352 | -7     | 231   | 256 | K.IEESAENEYGTASENYQTMSDTTFK.A |           |
| 868.5243                      | 869.5349  | 4      | 260   | 266 | R.RQLPVTR.T                   |           |
| 903.4814                      | 904.4877  | -1     | 267   | 273 | R.TKIDWNIK.I                  |           |
| 905.4276                      | 906.4713  | 40     | 279   | 286 | K.IGKEMQNA.-                  |           |



# Spot 285 (C18 20080606) - Tissue specific transplantation antigen P35B (Tsta3)

SUB (4700 Reflector Spec #1 MC=>BC=>MC[BP = 882.6, 14143] , <<C1\_MS\_1>> 4700 Reflector Spec #1 MC=>BC=>MC[BP = 882.6, 67

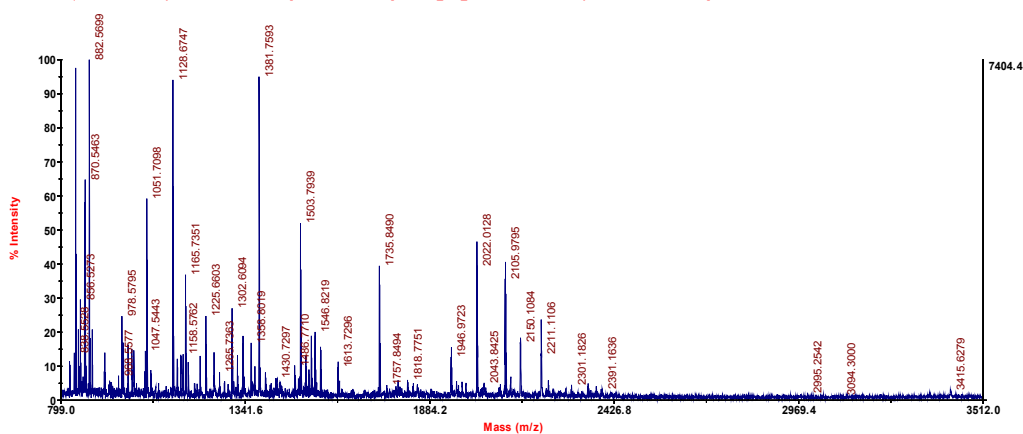

| Spot 285 (20080606-C18) Tsta3 |           |        |       |     |                             |               |
|-------------------------------|-----------|--------|-------|-----|-----------------------------|---------------|
| PMF/MALDI                     |           |        |       |     |                             |               |
| Calculated                    | Observed  | +/-ppm | start | end | Sequence                    |               |
| 1127.6663                     | 1128.6747 | 1      | 10    | 21  | R.ILVTGGSSLVGR.A            | Ion Score     |
| 2386.2533                     | 2387.2095 | -21    | 22    | 44  | R.AIQKVVADGAGLPGEWVWFVSSK.D | C.I.%         |
| 1945.9786                     | 1946.9723 | -7     | 26    | 44  | K.VVADGAGLPGEWVWFVSSK.D     | Modification  |
| 1734.8424                     | 1735.849  | 0      | 45    | 60  | K.DADLTDAAQTALFQK.V         |               |
| 1367.6966                     | 1368.7051 | -1     | 79    | 88  | R.NIKYNLDFWR.K              |               |
| 1012.4767                     | 1013.4888 | 5      | 82    | 88  | K.YNLDFWR.K                 |               |
| 1140.5716                     | 1141.5787 | 0      | 82    | 89  | K.YNLDFWRK.N                |               |
| 2021.0079                     | 2022.0128 | -1     | 90    | 107 | K.NVHINDNVLHSAFEVGT.R.K     |               |
| 2149.1028                     | 2150.1084 | -1     | 90    | 108 | K.NVHINDNVLHSAFEVGT.R.K.V   |               |
| 1046.5291                     | 1047.5443 | 8      | 148   | 155 | K.RMIDVQNR.A                | Oxidation (M) |
| 890.428                       | 891.4374  | 2      | 149   | 155 | R.MIDVQNR.A                 | Oxidation (M) |
| 1502.7841                     | 1503.7939 | 2      | 200   | 214 | K.SSGSALTVWGTGKPR.R         |               |
| 1380.7514                     | 1381.7593 | 0      | 215   | 225 | R.RQFIYSLDLAR.L             |               |
| 1224.6503                     | 1225.6603 | 2      | 216   | 225 | R.QFIYSLDLAR.L              |               |
| 946.58                        | 946.5831  | -4     | 226   | 232 | R.LFIWVLR.E                 |               |
| 2390.174                      | 2391.1636 | -7     | 233   | 253 | R.EYNEVEPIILSVGEEDEVSIIK.E  |               |
| 2348.0366                     | 2349.0815 | 16     | 254   | 275 | K.EAAEAVVEAMDFSGEYTFDSTK.S  | Oxidation (M) |

# Spot 286 (D8 20080606) - Tubulin cofactor A (Tbca)

SUB (4700 Reflector Spec #1 MC=>BC=>MC[BP = 1207.6, 7735] , <<C1\_MS\_1>> 4700 Reflector Spec #1 MC=>BC=>MC[BP = 882.6, 67

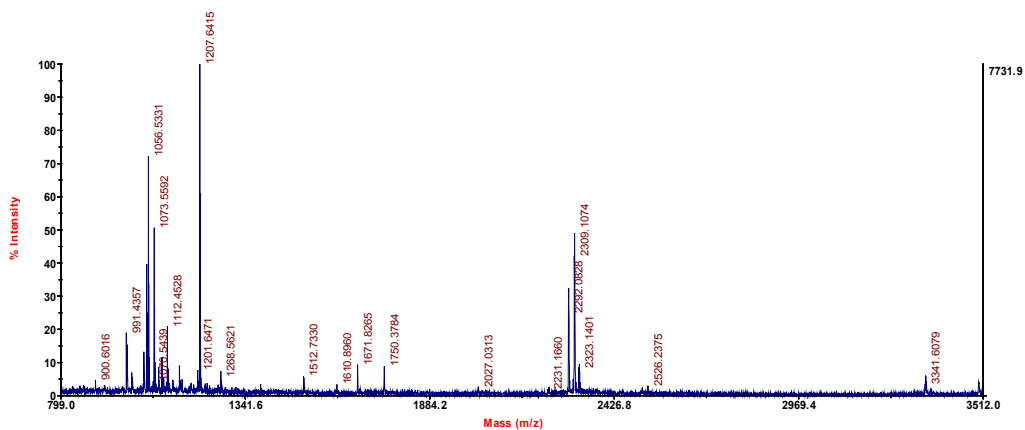

| Spot 286 (20080606-D8) Tbca |           |        |       |     |                          |               |
|-----------------------------|-----------|--------|-------|-----|--------------------------|---------------|
| PMF/MALDI                   |           |        |       |     |                          |               |
| Calculated                  | Observed  | +/-ppm | start | end | Sequence                 |               |
| 1226.671                    | 1229.6184 | -49    | 1     | 10  | -MADPRVRGIK.I            |               |
| 899.5916                    | 900.6016  | 3      | 11    | 18  | K.IKTGVVVK.R.L           | Oxidation (M) |
| 1269.6274                   | 1270.5747 | -47    | 22    | 31  | K.EKVMYKEAK.Q            | Oxidation (M) |
| 1511.7289                   | 1512.733  | -2     | 40    | 52  | K.MKAEDGENYAIKK.Q        | Oxidation (M) |
| 2291.1393                   | 2292.0828 | -28    | 42    | 61  | K.AEDGENYAIKKQAEILQESR.M |               |
| 1200.6462                   | 1201.6471 | -5     | 52    | 61  | K.QAEILQESR.M            |               |
| 1072.5513                   | 1073.5592 | 1      | 53    | 61  | K.QAEILQESR.M            |               |
| 1206.6357                   | 1207.6415 | -1     | 70    | 79  | R.RLEAAYTDLR.Q           |               |
| 1050.5345                   | 1051.5414 | 0      | 71    | 79  | R.LEAAYTDLR.Q            |               |
| 2308.107                    | 2309.1074 | -3     | 80    | 98  | R.QILESEKDLLEEAEYKEAR.I  |               |
| 1085.6332                   | 1086.6387 | -2     | 99    | 108 | R.IMLDSVKLEA.-           |               |







# Spot 302 (E5 20070719) – Microtubule-associated protein RP/EB family member 1 (Mapre1)

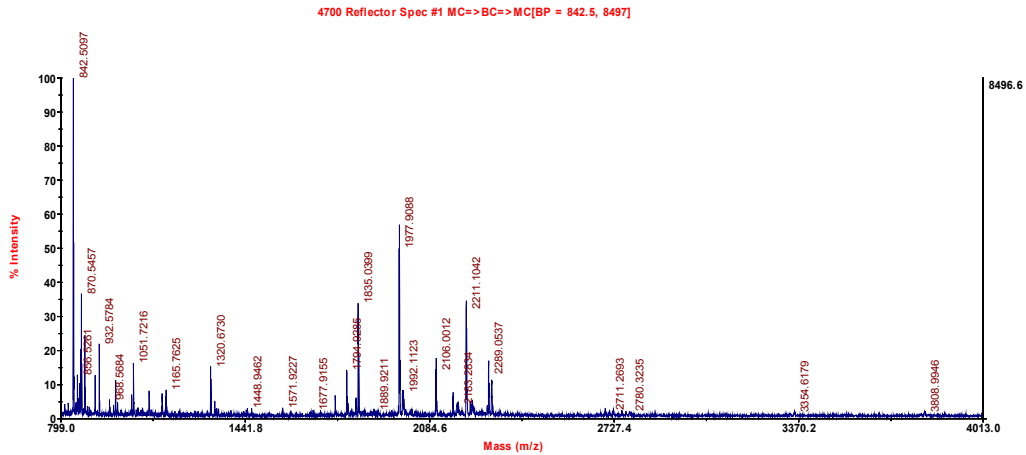

| Spot 302 (20070719-E5) Mapre1 |           |        |       |     |                                        |           |                    |
|-------------------------------|-----------|--------|-------|-----|----------------------------------------|-----------|--------------------|
| MS•MS/MS                      |           |        |       |     |                                        |           |                    |
| Calculated                    | Observed  | +/-ppm | start | end | Sequence                               | Ion Score | C.I.% Modification |
| 932.5675                      | 932.5753  | 8      | 76    | 83  | ILQAGFKR                               |           |                    |
| 932.5675                      | 932.5753  | 8      | 76    | 83  | ILQAGFKR                               |           |                    |
| 1045.5465                     | 1045.5662 | 19     | 214   | 221 | DFYFGKLR                               |           |                    |
| 1061.505                      | 1061.5457 | 38     | 212   | 219 | ERDFYFGK                               |           |                    |
| 1320.6583                     | 1320.668  | 7      | 66    | 75  | LEHEYIQNFK                             | 8         | 88.061             |
| 1320.6583                     | 1320.668  | 7      | 66    | 75  | LEHEYIQNFK                             |           |                    |
| 1794.9174                     | 1794.9248 | 4      | 62    | 75  | FOAKLEHEYIQNFK                         |           |                    |
| 1794.9174                     | 1794.9248 | 4      | 62    | 75  | FOAKLEHEYIQNFK                         | 12        | 94.454             |
| 1835.0245                     | 1835.0361 | 6      | 150   | 167 | KPLGSGSAAPQRPIATOR                     |           |                    |
| 1835.0245                     | 1835.0361 | 6      | 150   | 167 | KPLGSGSAAPQRPIATOR                     |           |                    |
| 1977.8977                     | 1977.9028 | 3      | 113   | 129 | FFDANYDGKEYDPVAAR                      |           |                    |
| 1977.8977                     | 1977.9028 | 3      | 113   | 129 | FFDANYDGKEYDPVAAR                      | 5         | 74.882             |
| 1988.9963                     | 1989.0118 | 8      | 204   | 219 | LTVEDLEKERDFYFGK                       |           |                    |
| 1988.9963                     | 1989.0118 | 8      | 204   | 219 | LTVEDLEKERDFYFGK                       |           |                    |
| 1992.1124                     | 1992.1089 | -2     | 130   | 149 | QGQETAVAPSLVAPALSKPK                   |           |                    |
| 2105.9927                     | 2105.998  | 3      | 112   | 129 | KFFDANYDGKEYDPVAAR                     | 5         | 73.21              |
| 2105.9927                     | 2105.998  | 3      | 112   | 129 | KFFDANYDGKEYDPVAAR                     |           |                    |
| 3808.1191                     | 3808.0178 | -27    | 130   | 167 | QGQETAVAPSLVAPALSKPKKPLGSGSAAPORPIATOR |           |                    |

| Spot 302 (20070719-E5) Mapre1 |           |        |       |     |                          |           |                    |
|-------------------------------|-----------|--------|-------|-----|--------------------------|-----------|--------------------|
| PMF/MALDI                     |           |        |       |     |                          |           |                    |
| Calculated                    | Observed  | +/-ppm | start | end | Sequence                 | Ion Score | C.I.% Modification |
| 2021.0734                     | 2022.0638 | -8     | 61    | 76  | KVKFOAKLEHEYIQNFK.I      |           |                    |
| 1793.91                       | 1794.9285 | 6      | 63    | 76  | KFOAKLEHEYIQNFK.I        |           |                    |
| 1319.651                      | 1320.673  | 11     | 67    | 76  | KLEHEYIQNFK.I            |           |                    |
| 931.5603                      | 932.5784  | 12     | 77    | 84  | KILQAGFKR.M              |           |                    |
| 2104.9854                     | 2106.0012 | 4      | 113   | 130 | K.KFFDANYDGKEYDPVAAR.Q   |           |                    |
| 1976.8904                     | 1977.9088 | 6      | 114   | 130 | K.FFDANYDGKEYDPVAAR.Q    |           |                    |
| 1991.1051                     | 1992.1123 | 0      | 131   | 150 | R.QGQETAVAPSLVAPALSKPK.K |           |                    |
| 1834.0173                     | 1835.0399 | 8      | 151   | 168 | K.KPLGSGSAAPQRPIATOR.T   |           |                    |
| 2018.8673                     | 2019.9552 | 40     | 183   | 201 | K.NPQMGNGDDEAAELMQGVK.V  |           | Oxidation (M)      |
| 1570.893                      | 1571.9227 | 14     | 202   | 214 | K.VLKLTVEDLEKER.D        |           |                    |
| 1987.9891                     | 1989.0173 | 11     | 205   | 220 | K.LTVEDLEKERDFYFGK.L     |           |                    |
| 1060.4978                     | 1061.5466 | 39     | 213   | 220 | K.ERDFYFGK.L             |           |                    |
| 1044.5393                     | 1045.5695 | 22     | 215   | 222 | R.DFYFGKLR.N             |           |                    |

# Spot 307 (D20 20070719) – Protein disulfide-isomerase precursor (P4hb, Pdia1)

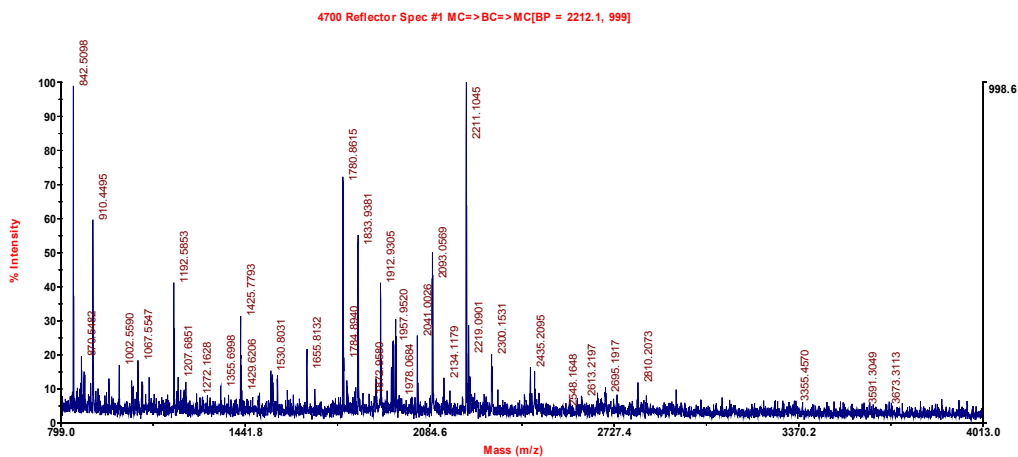

| Spot 307 (20070719-D20) P4hb, Pdia1 |           |        |       |     |                       |           |        |               |  |
|-------------------------------------|-----------|--------|-------|-----|-----------------------|-----------|--------|---------------|--|
| MS•MS/MS                            |           |        |       |     |                       |           |        |               |  |
| Calculated                          | Observed  | +/-ppm | start | end | Sequence              | Ion Score | C.I.%  | Modification  |  |
| 910.4417                            | 910.446   | 5      | 447   | 454 | FFPASADR              |           |        |               |  |
| 910.4417                            | 910.446   | 5      | 447   | 454 | FFPASADR              |           |        |               |  |
| 966.5658                            | 966.5798  | 14     | 303   | 310 | ILEFFGLK              |           |        |               |  |
| 1002.5577                           | 1002.555  | -3     | 72    | 80  | LKAEQSEIR             |           |        |               |  |
| 1066.5164                           | 1066.5223 | 6      | 455   | 463 | TVIDYNGER             |           |        |               |  |
| 1081.6769                           | 1081.6942 | 16     | 257   | 265 | THILLFLPK             |           |        |               |  |
| 1355.6477                           | 1355.6957 | 35     | 378   | 388 | NFEVAFDEKK            |           |        |               |  |
| 1424.7783                           | 1424.804  | 18     | 198   | 209 | YQLDKDGVVLFK          |           |        |               |  |
| 1552.8733                           | 1552.8961 | 15     | 198   | 210 | YQLDKDGVVLFK          |           |        |               |  |
| 1587.8013                           | 1587.8472 | 29     | 266   | 279 | SVSDYDGKLSNFKK        |           |        |               |  |
| 1655.766                            | 1655.8142 | 29     | 211   | 224 | FDEGRNFEGETK          |           |        |               |  |
| 1780.8348                           | 1780.8633 | 16     | 84    | 99  | VDATEESDLAQQYGVR      |           |        |               |  |
| 1780.8348                           | 1780.8633 | 16     | 84    | 99  | VDATEESDLAQQYGVR      | 4         | 40.068 |               |  |
| 1833.913                            | 1833.9404 | 15     | 268   | 302 | ILFIFIDSDHTDNQR       | 15        | 95.567 |               |  |
| 1833.913                            | 1833.9404 | 15     | 268   | 302 | ILFIFIDSDHTDNQR       |           |        |               |  |
| 1912.9034                           | 1912.9344 | 16     | 211   | 226 | FDEGRNFEGETKEK        |           |        |               |  |
| 1912.9034                           | 1912.9344 | 16     | 211   | 226 | FDEGRNFEGETKEK        |           |        |               |  |
| 1957.9402                           | 1957.9553 | 8      | 447   | 463 | FFPASADRTVIDYNGER     |           |        |               |  |
| 1965.0439                           | 1965.0548 | 6      | 233   | 249 | HNQLPLVIEFTQTAPK      |           |        |               |  |
| 2093.0508                           | 2093.0603 | 5      | 81    | 99  | LAKVDATEESDLAQQYGVR   |           |        |               |  |
| 2093.0508                           | 2093.0603 | 5      | 81    | 99  | LAKVDATEESDLAQQYGVR   | 19        | 98.368 |               |  |
| 2219.1013                           | 2219.0928 | -4     | 427   | 446 | MDSTANEVAVKVSFPTLK    |           |        | Oxidation (M) |  |
| 2219.1013                           | 2219.0928 | -4     | 427   | 446 | MDSTANEVAVKVSFPTLK    |           |        | Oxidation (M) |  |
| 2434.2434                           | 2434.2012 | -17    | 353   | 372 | IKPHLMSQELPEDWDKQPVK  |           |        | Oxidation (M) |  |
| 2613.2852                           | 2613.2244 | -23    | 319   | 340 | LITLEEEMTKYKPEDELTAEK |           |        | Oxidation (M) |  |

| Spot 307 (20070719-D20) P4hb, Pdia1 |           |        |       |     |                           |           |       |               |  |
|-------------------------------------|-----------|--------|-------|-----|---------------------------|-----------|-------|---------------|--|
| PMF/MALDI                           |           |        |       |     |                           |           |       |               |  |
| Calculated                          | Observed  | +/-ppm | start | end | Sequence                  | Ion Score | C.I.% | Modification  |  |
| 1001.5505                           | 1002.559  | 1      | 72    | 80  | LKAEQSEIR.L               |           |       |               |  |
| 2092.0436                           | 2093.0569 | 3      | 81    | 99  | R.LAKVDATEESDLAQQYGVR.G   |           |       |               |  |
| 1779.8275                           | 1780.8615 | 15     | 84    | 99  | K.VDATEESDLAQQYGVR.G      |           |       |               |  |
| 1201.5979                           | 1202.6328 | 23     | 123   | 132 | R.EADDIVNWLK.K            |           |       |               |  |
| 1423.7711                           | 1424.8047 | 18     | 198   | 209 | K.YQLDKDGVVLFK.K          |           |       |               |  |
| 1654.7587                           | 1655.8132 | 29     | 211   | 224 | K.FDEGRNFEGETK.E          |           |       |               |  |
| 1964.0367                           | 1965.0522 | 4      | 233   | 249 | K.HNQLPLVIEFTQTAPK.I      |           |       |               |  |
| 1080.6695                           | 1081.698  | 20     | 257   | 265 | K.THILLFLPK.S             |           |       |               |  |
| 1832.9067                           | 1833.9381 | 14     | 268   | 302 | K.ILFIFIDSDHTDNQR.I       |           |       |               |  |
| 965.5566                            | 966.5925  | 17     | 303   | 310 | R.ILEFFGLK.K              |           |       |               |  |
| 1093.6535                           | 1094.6735 | 12     | 303   | 311 | R.ILEFFGLK.K.E            |           |       |               |  |
| 2612.2778                           | 2613.2197 | -25    | 319   | 340 | R.LITLEEEMTKYKPEDELTAEK.I |           |       | Oxidation (M) |  |
| 1408.6722                           | 1409.7102 | 22     | 329   | 340 | K.YKPEDELTAEK.I           |           |       |               |  |
| 1964.9666                           | 1966.0592 | 43     | 353   | 368 | K.IKPHLMSQELPEDWDK.Q      |           |       |               |  |
| 2433.2362                           | 2434.1958 | -20    | 353   | 372 | K.IKPHLMSQELPEDWDKQPVK.V  |           |       | Oxidation (M) |  |
| 1354.6405                           | 1355.6998 | 38     | 378   | 388 | K.NFEVAFDEKK.N            |           |       |               |  |
| 1728.9046                           | 1729.9167 | 3      | 412   | 426 | K.LGETYKHENVIK.M          |           |       |               |  |
| 2218.094                            | 2219.0901 | -5     | 427   | 446 | K.MDSTANEVAVKVSFPTLK.F    |           |       | Oxidation (M) |  |
| 927.5178                            | 928.5173  | -8     | 439   | 446 | K.VHSFPTLK.F              |           |       |               |  |
| 909.4345                            | 910.4495  | 9      | 447   | 454 | K.FFPASADR.T              |           |       |               |  |
| 1956.933                            | 1957.952  | 6      | 447   | 463 | K.FFPASADRTVIDYNGER.T     |           |       |               |  |
| 1065.5091                           | 1066.5245 | 8      | 455   | 463 | R.TVIDYNGER.T             |           |       |               |  |

# Spot 311 (D5 20070719) – Probable ATP-dependent RNA helicase DDX4 (Ddx4)

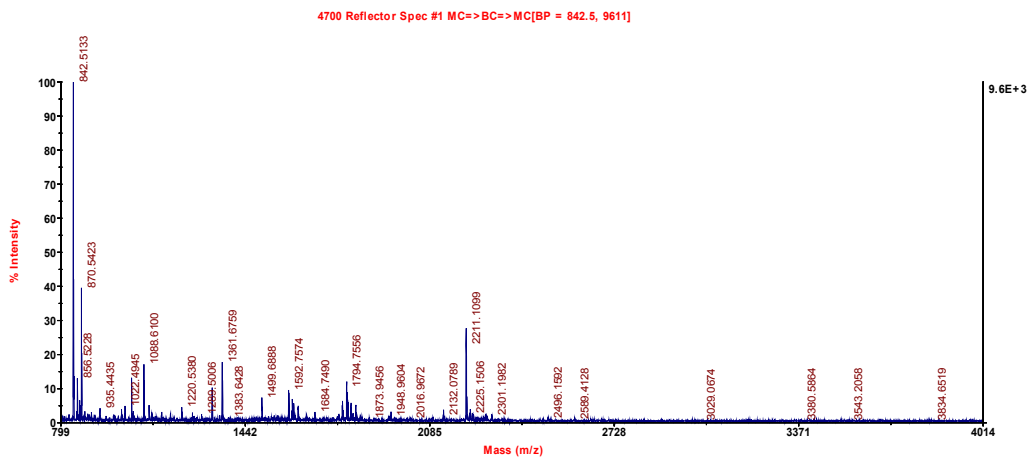

| Spot 311 (20070719-D5) Ddx4 |           |        |       |     |                     |           |        |              |  |
|-----------------------------|-----------|--------|-------|-----|---------------------|-----------|--------|--------------|--|
| MS•MS/MS                    |           |        |       |     |                     |           |        |              |  |
| Calculated                  | Observed  | +/-ppm | start | end | Sequence            | Ion Score | C.I.%  | Modification |  |
| 870.577                     | 870.5404  | -42    | 515   | 521 | KLVEILR             |           |        |              |  |
| 935.4581                    | 935.4437  | -15    | 565   | 572 | EQALGDFR            |           |        |              |  |
| 1088.6462                   | 1088.615  | -29    | 302   | 311 | YSIPVLAGR           |           |        |              |  |
| 1088.6462                   | 1088.615  | -29    | 302   | 311 | YSIPVLAGR           |           |        |              |  |
| 1220.6018                   | 1220.5472 | -45    | 563   | 572 | EREQALGDFR          |           |        |              |  |
| 1361.7423                   | 1361.6884 | -40    | 361   | 371 | ELINQIYLEAR         |           |        |              |  |
| 1361.7423                   | 1361.6884 | -40    | 361   | 371 | ELINQIYLEAR         | 20        | 99.081 |              |  |
| 1383.647                    | 1383.6567 | 7      | 436   | 447 | MLDMGFPEMKK         |           |        |              |  |
| 1499.7561                   | 1499.7087 | -32    | 550   | 562 | ISTSIHGDTREGR       |           |        |              |  |
| 1499.7561                   | 1499.7087 | -32    | 550   | 562 | ISTSIHGDTREGR       |           |        |              |  |
| 1610.7405                   | 1610.7026 | -24    | 173   | 188 | KPAASDSGSGDTFQSR    |           |        |              |  |
| 1625.6826                   | 1625.6464 | -22    | 133   | 148 | GGYPDGNDSSEASGPFR   |           |        |              |  |
| 1762.9156                   | 1762.8679 | -27    | 522   | 536 | NIGDERPMVFVETKK     |           |        |              |  |
| 1779.9276                   | 1779.8959 | -18    | 461   | 475 | QTLFSATFPPEIQR      |           |        |              |  |
| 1779.9276                   | 1779.8959 | -18    | 461   | 475 | QTLFSATFPPEIQR      |           |        |              |  |
| 1781.7837                   | 1781.7552 | -16    | 133   | 149 | GGYPDGNDSSEASGPFR   |           |        |              |  |
| 2132.0659                   | 2132.1204 | 26     | 625   | 643 | AISFFDTESDNHLAQPLVK | 34        | 99.962 |              |  |
| 2132.0659                   | 2132.1204 | 26     | 625   | 643 | AISFFDTESDNHLAQPLVK |           |        |              |  |

| Spot 311 (20070719-D5) Ddx4 |           |        |       |     |                         |           |       |               |  |
|-----------------------------|-----------|--------|-------|-----|-------------------------|-----------|-------|---------------|--|
| PMF/MALDI                   |           |        |       |     |                         |           |       |               |  |
| Calculated                  | Observed  | +/-ppm | start | end | Sequence                | Ion Score | C.I.% | Modification  |  |
| 1496.6049                   | 1497.6663 | 36     | 39    | 53  | RTSASSEMEDGPSGR.D       |           |       |               |  |
| 1624.6754                   | 1625.6217 | -38    | 133   | 148 | RGGYPDGNDSSEASGPFR.R    |           |       |               |  |
| 1609.7332                   | 1610.6796 | -38    | 188   | 203 | RKPAASDSGSGDTFQSR.S     |           |       |               |  |
| 1188.5986                   | 1189.5704 | -30    | 213   | 224 | KGLNEEVVTGSQK.N         |           |       |               |  |
| 1087.639                    | 1088.61   | -33    | 317   | 326 | KYSIPVLAGR.D            |           |       |               |  |
| 1360.735                    | 1361.6759 | -49    | 376   | 386 | R ELINQIYLEAR.K         |           |       |               |  |
| 1603.8471                   | 1604.7862 | -41    | 396   | 410 | R AVVIYGGTGFQHSIR.Q     |           |       |               |  |
| 804.4415                    | 805.4499  | 1      | 426   | 432 | R LMDIIGK.E             |           |       | Oxidation (M) |  |
| 1092.5451                   | 1093.4994 | -49    | 442   | 450 | K YLVLEADPR.M           |           |       |               |  |
| 1105.5148                   | 1106.504  | -16    | 463   | 472 | K LUSCPQMPQSK.E         |           |       | Oxidation (M) |  |
| 1778.9203                   | 1779.8961 | -36    | 476   | 490 | R QTLFSATFPPEIQR.L      |           |       |               |  |
| 1591.8206                   | 1592.7576 | -44    | 514   | 527 | R DVQGSILQVGOYSK.R      |           |       |               |  |
| 934.4508                    | 935.4435  | -16    | 580   | 587 | R EQALGDFR.C            |           |       |               |  |
| 2131.0586                   | 2132.0789 | 6      | 640   | 658 | R AISFFDTESDNHLAQPLVK.V |           |       |               |  |
| 1021.5193                   | 1022.4946 | -31    | 690   | 699 | R GAVFASVDTR.K          |           |       |               |  |

# Spot 313 (D3 20070719) – Stress-70 protein, mitochondrial precursor (Hspa9)

4700 Reflector Spec #1 MC=>BC=>MC[BP = 842.5, 8323]

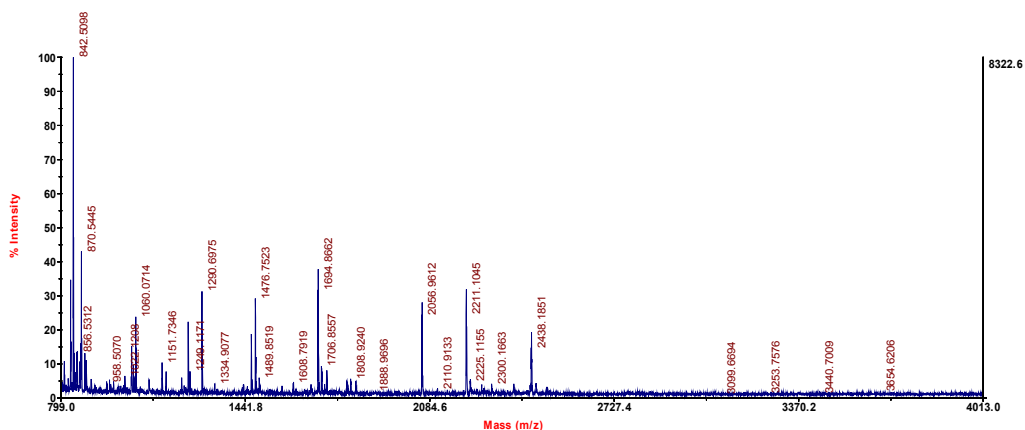

| Spot 313 (20070719-D3) Hspa9 |           |        |       |     |                       |           |                                    |
|------------------------------|-----------|--------|-------|-----|-----------------------|-----------|------------------------------------|
| MS•MS/MS                     |           |        |       |     |                       |           |                                    |
| Calculated                   | Observed  | +/-ppm | start | end | Sequence              | Ion Score | C.I.% Modification                 |
| 887.5131                     | 887.5109  | -2     | 100   | 107 | LVGMPAKR              |           | Oxidation (M)                      |
| 904.5032                     | 904.502   | -1     | 618   | 624 | MRELLAR               |           | Oxidation (M)                      |
| 958.4952                     | 958.504   | 9      | 77    | 85  | VLENAEGAR             |           |                                    |
| 1045.5387                    | 1045.5636 | 24     | 647   | 654 | LFEMAYKK              |           | Oxidation (M)                      |
| 1056.6312                    | 1056.6444 | 12     | 285   | 292 | HMKFKR                |           |                                    |
| 1242.6801                    | 1242.6956 | 12     | 207   | 218 | DAGQISGLNVLR          |           |                                    |
| 1242.6801                    | 1242.6956 | 12     | 207   | 218 | DAGQISGLNVLR          | 0         | 0                                  |
| 1290.6801                    | 1290.6971 | 13     | 395   | 405 | VQQTVDLFGFR           |           |                                    |
| 1290.6801                    | 1290.6971 | 13     | 395   | 405 | VQQTVDLFGFR           | 7         | 81.02                              |
| 1462.757                     | 1462.7739 | 12     | 378   | 391 | SDIGEVILVGGMTR        |           | Oxidation (M)                      |
| 1462.757                     | 1462.7739 | 12     | 378   | 391 | SDIGEVILVGGMTR        |           | Oxidation (M)                      |
| 1476.7329                    | 1476.752  | 13     | 86    | 99  | TTPSVVAFDPDGER        |           |                                    |
| 1476.7329                    | 1476.752  | 13     | 86    | 99  | TTPSVVAFDPDGER        | 0         | 3.104                              |
| 1489.8373                    | 1489.8536 | 11     | 349   | 361 | AQFEGIVDLIKR          |           |                                    |
| 1490.7996                    | 1490.8464 | 31     | 613   | 624 | EEISKMRELLAR          |           | Oxidation (M)                      |
| 1608.7687                    | 1608.7921 | 15     | 174   | 187 | MKETAENYLGHAK         |           | Oxidation (M)                      |
| 1670.9183                    | 1670.9171 | -1     | 203   | 218 | QATKDAGQISGLNVLR      |           |                                    |
| 1694.8496                    | 1694.8652 | 9      | 188   | 202 | NAVITVPAYFNDSQR       |           |                                    |
| 1694.8496                    | 1694.8652 | 9      | 188   | 202 | NAVITVPAYFNDSQR       | 4         | 58.284                             |
| 1706.8378                    | 1706.8563 | 11     | 293   | 307 | ETGVDLTKDNMALQR       |           | Oxidation (M)                      |
| 1709.8717                    | 1709.8639 | -5     | 144   | 159 | IVRASNGDAWVEAHGK      |           |                                    |
| 1724.8715                    | 1724.8921 | 12     | 108   | 122 | QAVTNPNTFYATKR        |           |                                    |
| 1808.9025                    | 1808.9252 | 13     | 469   | 485 | SQVVFSTAADGQTQVEIK    |           |                                    |
| 2110.9783                    | 2110.9368 | -20    | 596   | 612 | MEEFKDQLPADECNKLK     |           | Carbamidomethyl (C); Oxidation (M) |
| 2434.2129                    | 2434.2026 | -4     | 542   | 563 | EQQIMQSSGGLSKDDIENMVK |           | Oxidation (M)                      |

| Spot 313 (20070719-D3) Hspa9 |           |        |       |     |                              |           |                    |
|------------------------------|-----------|--------|-------|-----|------------------------------|-----------|--------------------|
| PMF/MALDI                    |           |        |       |     |                              |           |                    |
| Calculated                   | Observed  | +/-ppm | start | end | Sequence                     | Ion Score | C.I.% Modification |
| 2421.188                     | 2422.1882 | -3     | 53    | 76  | K.GAVVGDLDGTTNSCVAVMEGKGAQ.V |           | Oxidation (M)      |
| 957.4879                     | 958.507   | 12     | 77    | 85  | K.VLENAEGAR.T                |           |                    |
| 1475.7256                    | 1476.7522 | 13     | 86    | 99  | R.TTPSVVAFDPDGER.L           |           |                    |
| 886.5058                     | 887.5123  | -1     | 100   | 107 | R.LVGMPAKR.G                 |           | Oxidation (M)      |
| 1567.7631                    | 1568.7812 | 7      | 108   | 121 | R.QAVTNPNTFYATK.R            |           |                    |
| 1723.8642                    | 1724.8933 | 13     | 108   | 122 | R.QAVTNPNTFYATK.R.L          |           |                    |
| 971.5916                     | 972.615   | 17     | 139   | 146 | K.NVPFKIVR.A                 |           |                    |
| 1708.8645                    | 1709.8644 | -4     | 144   | 159 | K.IVRASNGDAWVEAHGK.L         |           |                    |
| 1568.8272                    | 1569.7996 | -22    | 160   | 173 | K.LYSPSQIGAFVLMK.M           |           |                    |
| 1607.7613                    | 1608.7917 | 14     | 174   | 187 | K.MKETAENYLGHAK.N            |           | Oxidation (M)      |
| 1693.8424                    | 1694.8652 | 10     | 188   | 202 | K.NAVITVPAYFNDSQR.Q          |           | Oxidation (M)      |
| 1669.9111                    | 1670.9181 | 0      | 203   | 218 | R.QATKDAGQISGLNVLR.V         |           |                    |
| 1241.6728                    | 1242.6979 | 14     | 207   | 218 | K.DAGQISGLNVLR.V             |           |                    |
| 1705.8305                    | 1706.8556 | 10     | 293   | 307 | R.ETGVDLTKDNMALQR.V          |           | Oxidation (M)      |
| 1488.83                      | 1489.8518 | 10     | 349   | 361 | R.AQFEGIVDLIKR.T             |           |                    |
| 1461.7497                    | 1462.7737 | 11     | 378   | 391 | K.SDIGEVILVGGMTR.M           |           | Oxidation (M)      |
| 1289.6728                    | 1290.6974 | 13     | 395   | 405 | K.VQQTVDLFGFR.A              |           |                    |
| 1807.8952                    | 1808.924  | 12     | 469   | 485 | K.SQVVFSTAADGQTQVEIK.V       |           |                    |
| 2433.2057                    | 2434.199  | -6     | 542   | 563 | R.EQQIMQSSGGLSKDDIENMVK.N    |           | Oxidation (M)      |
| 903.496                      | 904.5026  | -1     | 618   | 624 | K.MRELLAR.K                  |           | Oxidation (M)      |
| 1044.5314                    | 1045.5656 | 26     | 647   | 654 | K.LFEMAYKK.M                 |           | Oxidation (M)      |

# Spot 320 (C22 20080606) - Heat shock protein 1 (chaperonin) (Hspd1)

SUB (4700 Reflector Spec #1 MC=>BC=>MC[BP = 882.6, 6937] , <<C1\_MS\_1>> 4700 Reflector Spec #1 MC=>BC=>MC[BP = 882.6, 673

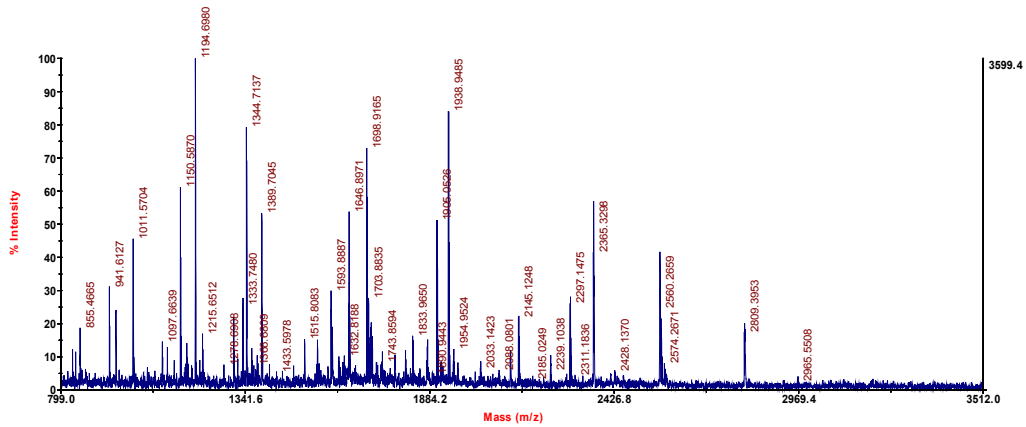

| Spot 320 (20080606-C22) Hspd1 |           |        |       |     |                              |           |                    |
|-------------------------------|-----------|--------|-------|-----|------------------------------|-----------|--------------------|
| PMF/MALDI                     |           |        |       |     |                              |           |                    |
| Calculated                    | Observed  | +/-ppm | start | end | Sequence                     | Ion Score | C.I.% Modification |
| 2144.1221                     | 2145.1248 | -2     | 38    | 58  | R.ALMLQGVLDLADAVVTMGPK.G     |           | 2 Oxidation (M)    |
| 1556.8311                     | 1557.827  | -7     | 59    | 72  | K.GRTVIEQSWGSPK.V            |           |                    |
| 1343.7085                     | 1344.7137 | -2     | 61    | 72  | R.TVIEQSWGSPK.V              |           |                    |
| 2559.2413                     | 2560.2659 | 7      | 97    | 121 | K.LVQDVANNNEEAGDGTITATVLAR.S |           |                    |
| 1182.672                      | 1183.6521 | -23    | 131   | 141 | K.ISKGANPVEIR.R              |           |                    |
| 854.461                       | 855.4665  | -2     | 134   | 141 | K.GANPVEIR.R                 |           |                    |
| 1010.5621                     | 1011.5704 | 1      | 134   | 142 | K.GANPVEIRR.G                |           |                    |
| 2238.0838                     | 2239.1038 | 6      | 203   | 221 | K.DGKTLNDELEIEIGMKFDR.G      |           | Oxidation (M)      |
| 1921.9455                     | 1922.9319 | -11    | 206   | 221 | K.TLNDELEIEIGMKFDR.G         |           |                    |
| 1937.9404                     | 1938.9485 | 0      | 206   | 221 | K.TLNDELEIEIGMKFDR.G         |           | Oxidation (M)      |
| 1806.8941                     | 1807.8937 | -4     | 219   | 233 | K.FDRGYISPYFINTSK.G          |           |                    |
| 2120.0691                     | 2121.0276 | -23    | 219   | 236 | K.FDRGYISPYFINTSKGQK.C       |           |                    |
| 1388.6976                     | 1389.7045 | 0      | 222   | 233 | R.GYISPYFINTSK.G             |           |                    |
| 1729.8233                     | 1730.8927 | 36     | 237   | 250 | K.CEFQDAYVLLSEK.I            |           |                    |
| 2032.1429                     | 2033.1423 | -4     | 250   | 268 | K.KISSVGSIVPALEIANHR.K       |           |                    |
| 1904.0479                     | 1905.0526 | -1     | 251   | 268 | K.ISSVGSIVPALEIANHR.K        |           |                    |
| 2364.3264                     | 2365.3298 | -2     | 269   | 290 | R.KPLVIAEDVDGEALSTLVNLR.L    |           |                    |
| 1725.9526                     | 1726.9257 | -20    | 293   | 309 | K.VGLQVAVKAPFGDNR.K          |           |                    |
| 1854.0476                     | 1855.0613 | 3      | 293   | 310 | K.VGLQVAVKAPFGDNRK.N         |           |                    |
| 832.3628                      | 833.3945  | 5      | 302   | 309 | K.APFGDNR.K                  |           |                    |
| 960.4777                      | 961.494   | 9      | 302   | 310 | K.APFGDNRK.N                 |           |                    |
| 1645.8961                     | 1646.8971 | -4     | 345   | 359 | K.VGEVIVTKDDAMLLK.G          |           |                    |
| 2452.2333                     | 2453.2002 | -16    | 370   | 389 | K.RIQEITEQDITSEYEKEK.L       |           | Oxidation (M)      |
| 2038.9946                     | 2040.0173 | 8      | 371   | 387 | R.IQEITEQDITSEYEK.E          |           |                    |
| 2296.1322                     | 2297.1475 | 3      | 371   | 389 | R.IQEITEQDITSEYEKEK.L        |           |                    |
| 2808.4028                     | 2809.3953 | -5     | 371   | 393 | R.IQEITEQDITSEYEKEKLNLR.L    |           |                    |
| 1631.8115                     | 1632.8188 | 0      | 406   | 420 | K.VGGTSDVEVNEKDR.V           |           |                    |
| 959.5036                      | 960.5117  | 1      | 421   | 429 | R.VTDALNATR.A                |           |                    |
| 940.6069                      | 941.6127  | -2     | 463   | 470 | K.IGIEIIR.A                  |           |                    |
| 1214.6507                     | 1215.6512 | -6     | 482   | 493 | K.NAGVEGSLIVEK.I             |           |                    |
| 2563.1822                     | 2564.2178 | 11     | 494   | 516 | K.ILGSSSEVGYDAMLGDFVNMVEK.G  |           | 2 Oxidation (M)    |
| 1096.6604                     | 1097.6639 | -3     | 517   | 526 | K.GIIDPTKAVR.T               |           |                    |

# Spot 330 (D22 20070719) – SUMO-activating enzyme subunit 1 (Sae1)

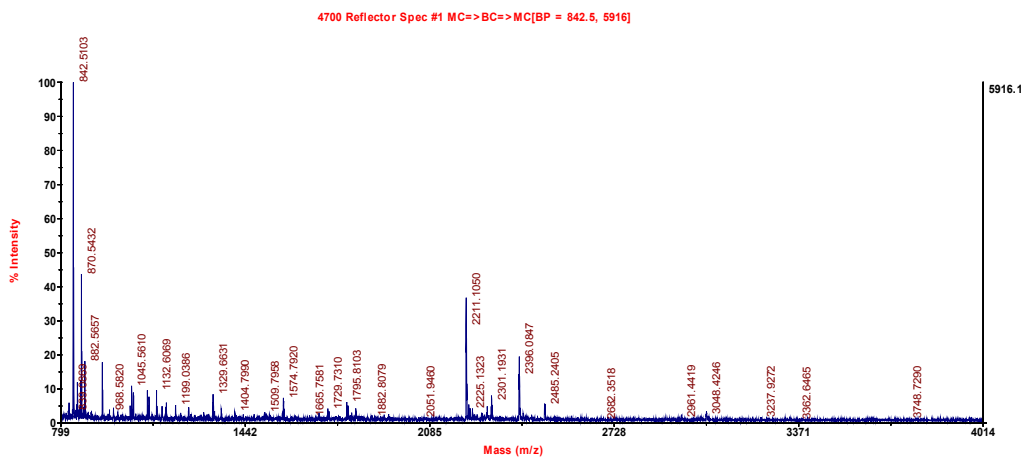

| Spot 330 (20070719-D22) Sae1 |           |        |       |     |                            |               |
|------------------------------|-----------|--------|-------|-----|----------------------------|---------------|
| PMF/MALDI                    |           |        |       |     |                            |               |
| Calculated                   | Observed  | +/-ppm | start | end | Sequence                   | Ion Score     |
| 2395.0775                    | 2396.0845 | 0      | 2     | 24  | M.VEKEEVSGGGGISEEEAAQYDR.Q |               |
| 1099.6138                    | 1100.6176 | -3     | 28    | 36  | R.LWGLEAQKR.L              |               |
| 1513.8902                    | 1514.8726 | -16    | 42    | 56  | R.VLVGMKGLGAEIAK.N         | Oxidation (M) |
| 826.5276                     | 827.5223  | -15    | 57    | 64  | K.NLILAGVK.G               |               |
| 2484.2319                    | 2485.2402 | 0      | 65    | 86  | K.GLTMLDHEQVSPEDLGAQFLIR.T | Oxidation (M) |
| 1573.7808                    | 1574.7919 | 2      | 87    | 101 | R.TGSVGNRAEASLER.A         |               |
| 1243.6231                    | 1244.6186 | -11    | 102   | 112 | R.AGNLNPMDVK.V             | Oxidation (M) |
| 1356.6634                    | 1357.6595 | -8     | 187   | 199 | K.VSQGVEDGPPDAKR.A         |               |
| 2264.092                     | 2265.0693 | -13    | 257   | 276 | K.GRDPDSYSEDAELLQIR.N      |               |
| 2050.9695                    | 2051.9458 | -15    | 259   | 276 | R.DPTSDSYSEDAELLQIR.N      |               |
| 2219.0747                    | 2220.0918 | 4      | 277   | 296 | R.NDVFDSLGVSPDLLPDDFVY.Y   |               |
| 2283.0531                    | 2284.1475 | 38     | 320   | 338 | K.ALSGRDPPHNNFFFDGMK.G     | Oxidation (M) |
| 1727.7403                    | 1728.7565 | 5      | 325   | 338 | R.DPPHNNFFFDGMK.G          | Oxidation (M) |

# Spot 338 (C21 20080606) – NADH-ubiquinone oxidoreductase 75 kDa subunit, mitochondrial (Ndufs1)

SUB [4700 Reflector Spec #1 MC=>BC=>MC]BP = 882.6, 6098] , <<C1\_MS\_1>> 4700 Reflector Spec #1 MC=>BC=>MC]BP = 882.6, 673

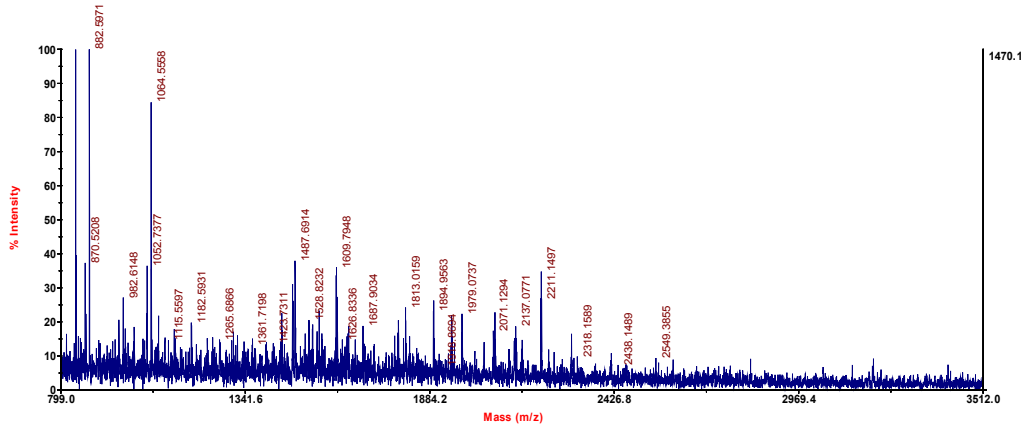

| Spot 338 (20080606-C21) Ndufs1 |           |        |       |     |                          |           |        |               |  |
|--------------------------------|-----------|--------|-------|-----|--------------------------|-----------|--------|---------------|--|
| PMF/MALDI                      |           |        |       |     |                          |           |        |               |  |
| Calculated                     | Observed  | +/-ppm | start | end | Sequence                 | Ion Score | C.I. % | Modification  |  |
| 1692.7365                      | 1693.7677 | -15    | 56    | 68  | K.VSMQIPRFYHER.L         |           |        |               |  |
| 1607.7791                      | 1608.7827 | -2     | 185   | 200 | R.FASEIAGVDLGTTR.G       |           |        |               |  |
| 2136.0733                      | 2137.0771 | -2     | 247   | 266 | R.KTESIDVMDAVGSNIVVSTR.T |           |        | Oxidation (M) |  |
| 1917.8527                      | 1918.8694 | 5      | 277   | 291 | R.MHEDINEEWSDKTR.F       |           |        | Oxidation (M) |  |
| 968.508                        | 969.5104  | -5     | 292   | 299 | R.FAYDGLKR.Q             |           |        |               |  |
| 1610.794                       | 1611.8    | -1     | 312   | 325 | K.GLLTYTSWEDALSR.V       |           |        |               |  |
| 1181.5751                      | 1182.5931 | 9      | 326   | 336 | R.VAGMLQSFEGK.A          |           |        | Oxidation (M) |  |
| 1063.5451                      | 1064.5558 | 3      | 409   | 417 | R.FEAPLFNAR.I            |           |        |               |  |
| 1557.7787                      | 1558.7979 | 8      | 451   | 464 | K.ILODIASGNHEFSK.V       |           |        |               |  |
| 1400.781                       | 1401.7819 | -5     | 471   | 483 | K.KPMVVLGSSALQR.D        |           |        | Oxidation (M) |  |
| 2070.1473                      | 2071.1294 | -12    | 519   | 538 | R.IASQVAALDLGYKPGVEAIR.K |           |        |               |  |
| 1537.8253                      | 1538.8057 | -17    | 608   | 621 | K.VAVTPPGLAREDWKI        |           |        |               |  |
| 2074.0946                      | 2075.1047 | 1      | 625   | 643 | R.ALSEIAGITLPYDTLDQVR.N  |           |        |               |  |



# Spot 339 (D4 20080606) - 6-phosphogluconolactonase (PgIs)

SUB (4700 Reflector Spec #1 MC=>BC=>MC[BP] = 882.6, 11309) , <<C1\_MS\_1>> 4700 Reflector Spec #1 MC=>BC=>MC[BP] = 882.6, 67

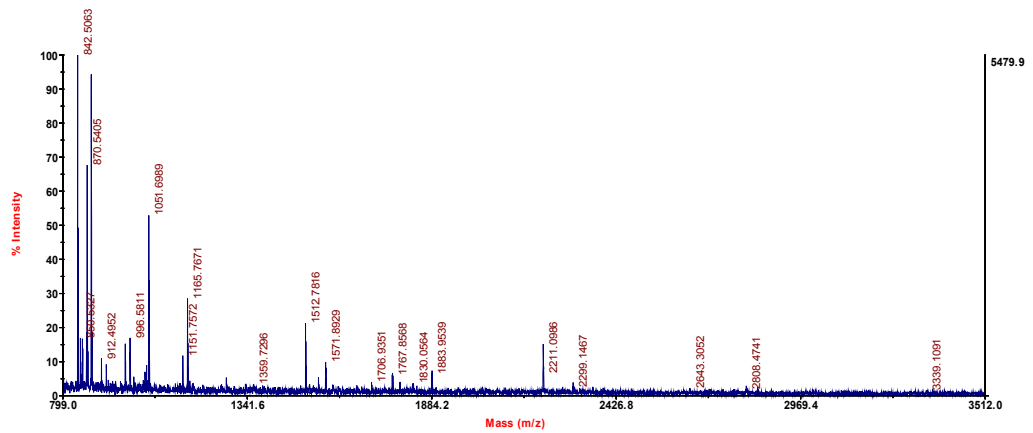

| Spot 339 (20080606-D4) PgIs |           |        |       |     |                                |                    |
|-----------------------------|-----------|--------|-------|-----|--------------------------------|--------------------|
| PMF/MALDI                   |           |        |       |     |                                |                    |
| Calculated                  | Observed  | +/-ppm | start | end | Sequence                       |                    |
| 1511.7732                   | 1512.7817 | 1      | 91    | 106 | R.DLPAATAPAGPASFAW             | Ion Score          |
| 1766.8628                   | 1767.8569 | -7     | 116   | 130 | R.LVPFDHAESTYGLYR.T            | C.I.% Modification |
| 2807.4229                   | 2808.4744 | 16     | 137   | 162 | K.LLPIFDQVLTIDPALPVEDAAEDYAR.K |                    |
| 1570.8831                   | 1571.8931 | 2      | 205   | 219 | K.IVAPIGDSKPPPPQR.V            |                    |
| 1882.9458                   | 1883.9539 | 0      | 249   | 265 | R.ILEDQESALPAAMVQPR.T          | Oxidation (M)      |

# Spot 342 (A24 20080606) - Inner membrane protein, mitochondrial, isoform CRA\_a (Immt)

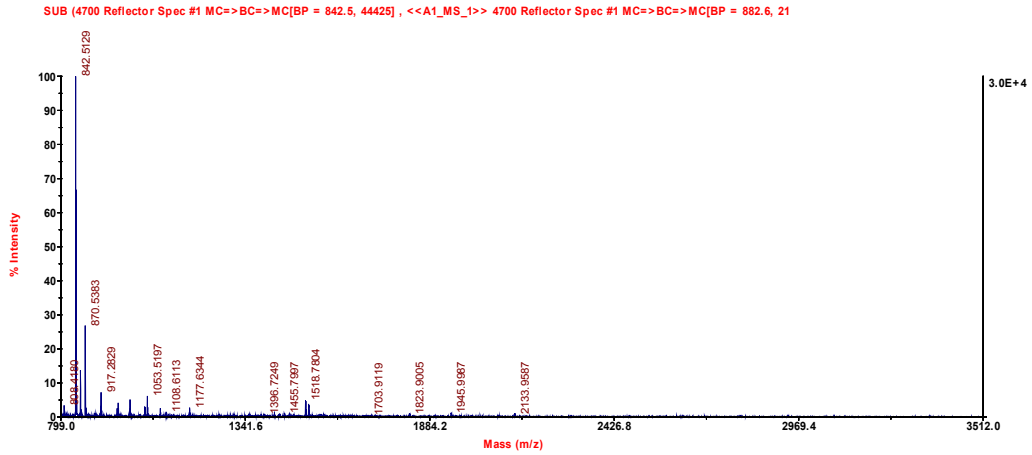

| Spot 342 (20080606-A24) Immt |           |        |       |     |                         |           |       |               |  |
|------------------------------|-----------|--------|-------|-----|-------------------------|-----------|-------|---------------|--|
| PMF/MALDI                    |           |        |       |     |                         |           |       |               |  |
| Calculated                   | Observed  | +/-ppm | start | end | Sequence                | Ion Score | C.I.% | Modification  |  |
| 966.6362                     | 967.5931  | 0      | 102   | 110 | K.KPIQSSPLK.I           |           |       |               |  |
| 1517.7695                    | 1518.7804 | 3      | 175   | 188 | K.SLEDALNOTATVTR.Q      |           |       |               |  |
| 1441.7899                    | 1442.8073 | 8      | 189   | 202 | R.QTITAGNAAVGAVK.A      |           |       |               |  |
| 1562.7828                    | 1563.7919 | 1      | 268   | 282 | R.EIAGATPYITAAEEK.L     |           |       |               |  |
| 1454.7803                    | 1455.7997 | 8      | 283   | 295 | K.LHSMVLDLSVVK.K        |           |       |               |  |
| 1526.8205                    | 1527.8331 | -3     | 306   | 318 | K.VVSYHVELVQAR.D        |           |       |               |  |
| 1570.7879                    | 1571.8281 | 21     | 324   | 337 | K.ELDSITPDITPGWK.G      |           |       |               |  |
| 1107.6036                    | 1108.6113 | 0      | 380   | 388 | K.QHIELALER.Q           |           |       |               |  |
| 807.4127                     | 808.418   | -2     | 396   | 403 | R.AFDSAVAK.A            |           |       |               |  |
| 2131.948                     | 2132.9565 | 1      | 480   | 497 | R.SQEQMDNFTLDINTAYAR.L  |           |       | Oxidation (M) |  |
| 1822.8809                    | 1823.9005 | 7      | 500   | 516 | R.GIEQAVQSHAVAEER.K     |           |       |               |  |
| 1944.9826                    | 1945.9987 | 5      | 534   | 552 | K.TSSAEMPTIPLGSAVEAIR.V |           |       | Oxidation (M) |  |
| 1052.5138                    | 1053.5197 | -1     | 576   | 584 | R.GVYSEETLR.A           |           |       |               |  |

**Spot 344 (D8 20070719) – mixture of: Tubulin alpha-3 chain (Tuba3), Tubulin alpha-8 chain (Tuba8), Tubulin alpha-1A chain (Tuba1a), Tubulin alpha-1B chain (Tuba1b), Tubulin alpha-1C chain (Tuba1c) and Tubulin alpha-8 chain (Tuba8)**

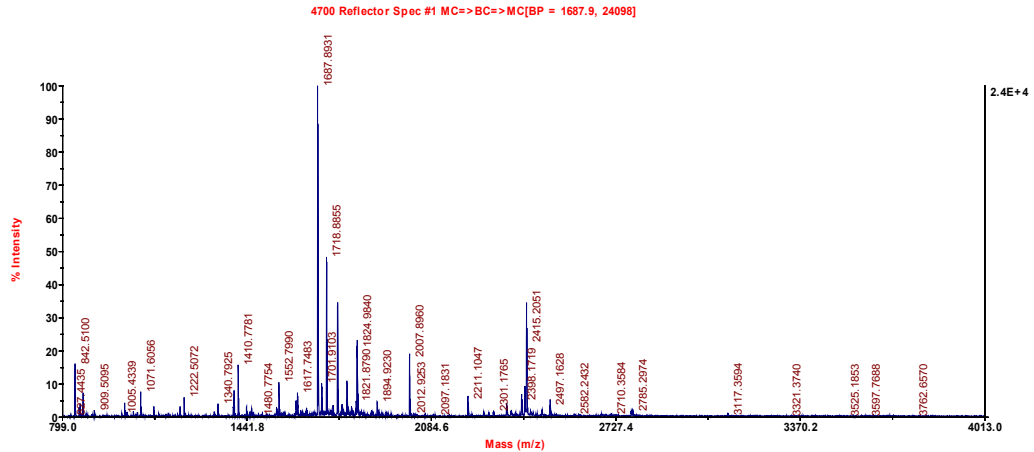

| Spot 344 (20070719-D8) Tuba3 |           |        |       |     |                              |           |
|------------------------------|-----------|--------|-------|-----|------------------------------|-----------|
| MS•MS/MS                     |           |        |       |     |                              |           |
| Calculated                   | Observed  | +/-ppm | start | end | Sequence                     | Ion Score |
| 1015.5782                    | 1015.5765 | -2     | 327   | 336 | DVNAAIATIK                   |           |
| 1071.6045                    | 1071.6045 | 0      | 113   | 121 | EIVDLVLR                     |           |
| 1340.7897                    | 1340.7898 | 0      | 113   | 123 | EIVDLVLRIR                   |           |
| 1396.693                     | 1396.6952 | 2      | 391   | 401 | LDHKFDLMYAK                  |           |
| 1410.7739                    | 1410.7773 | 2      | 85    | 96  | QLFHPEQLITGK                 |           |
| 1410.7739                    | 1410.7773 | 2      | 85    | 96  | QLFHPEQLITGK                 | 62        |
| 1457.8685                    | 1457.8756 | 5      | 230   | 243 | LIGQIVSSITASLR               |           |
| 1552.7941                    | 1552.7986 | 3      | 391   | 402 | LDHKFDLMYAKR                 |           |
| 1552.7941                    | 1552.7986 | 3      | 391   | 402 | LDHKFDLMYAKR                 | 4         |
| 1687.8901                    | 1687.8923 | 1      | 65    | 79  | AVFVDLEPTVWDEV               |           |
| 1687.8901                    | 1687.8923 | 1      | 65    | 79  | AVFVDLEPTVWDEV               | 103       |
| 1718.8821                    | 1718.8857 | 2      | 216   | 229 | NLDIERPTYTNLNR               |           |
| 1718.8821                    | 1718.8857 | 2      | 216   | 229 | NLDIERPTYTNLNR               | 24        |
| 1756.9633                    | 1756.964  | 0      | 265   | 280 | IHFPLATYAPVISAEEK            |           |
| 1756.9633                    | 1756.964  | 0      | 265   | 280 | IHFPLATYAPVISAEEK            | 133       |
| 1824.9854                    | 1824.9844 | -1     | 353   | 370 | VGINYQPPTVPPGGDLAK           |           |
| 1824.9854                    | 1824.9844 | -1     | 353   | 370 | VGINYQPPTVPPGGDLAK           | 47        |
| 1827.9963                    | 1828.0005 | 2      | 106   | 121 | GHYTIGKEIVDLVLR              |           |
| 1894.8318                    | 1894.9236 | 48     | 312   | 326 | YMACCMLYRGDVPK               |           |
| 2007.8929                    | 2007.8995 | 1      | 41    | 60  | TIGGGDDSFNTFFSETGAGK         | 130       |
| 2007.8929                    | 2007.8995 | 1      | 41    | 60  | TIGGGDDSFNTFFSETGAGK         |           |
| 2266.1714                    | 2266.1824 | 5      | 65    | 84  | AVFVDLEPTVWDEVRTGTYR         |           |
| 2346.0132                    | 2346.0095 | -2     | 403   | 422 | AFVHWYVYVGEEMEEGFSEAR        |           |
| 2409.2085                    | 2409.209  | 0      | 244   | 264 | FDGALNVDLTFQTNLVPYPR         |           |
| 2415.2051                    | 2415.207  | 1      | 85    | 105 | QLFHPEQLITGKEDAANNYAR        | 63        |
| 2415.2051                    | 2415.207  | 1      | 85    | 105 | QLFHPEQLITGKEDAANNYAR        |           |
| 2497.1741                    | 2497.1648 | -4     | 41    | 64  | TIGGGDDSFNTFFSETGAGKHVPR     |           |
| 3117.3428                    | 3117.3591 | 5      | 423   | 450 | EDLAALEKDYEEVGVDSVEAEAEEGEEY |           |

| Spot 344 (20070719-D8) Tuba3 |           |        |       |     |                                  |           |
|------------------------------|-----------|--------|-------|-----|----------------------------------|-----------|
| PMF/MALDI                    |           |        |       |     |                                  |           |
| Calculated                   | Observed  | +/-ppm | start | end | Sequence                         | Ion Score |
| 2006.8958                    | 2007.896  | 1      | 41    | 60  | K.TIGGGDDSFNTFFSETGAGK.H         |           |
| 2496.167                     | 2497.1628 | -5     | 41    | 64  | K.TIGGGDDSFNTFFSETGAGKHVPR.A     |           |
| 1686.8829                    | 1687.8931 | 2      | 65    | 79  | R.AVFVDLEPTVWDEV.R.T             |           |
| 2265.1641                    | 2266.1775 | 3      | 65    | 84  | R.AVFVDLEPTVWDEVRTGTYR.Q         |           |
| 1409.7667                    | 1410.7781 | 3      | 85    | 96  | R.QLFHPEQLITGK.E                 |           |
| 2414.1978                    | 2415.2051 | 0      | 85    | 105 | R.QLFHPEQLITGKEDAANNYAR.G        |           |
| 1022.4417                    | 1023.4598 | 11     | 97    | 105 | K.EDAANNYAR.G                    |           |
| 1826.989                     | 1828.0007 | 2      | 106   | 121 | R.GHYTIGKEIVDLVLR.I              |           |
| 1070.5972                    | 1071.6056 | 1      | 113   | 121 | K.EIVDLVLR.I                     |           |
| 1339.7823                    | 1340.7925 | 2      | 113   | 123 | K.EIVDLVLRIR.K                   |           |
| 908.4967                     | 909.5095  | 6      | 157   | 164 | R.LSDYGK.K.S                     |           |
| 1873.9758                    | 1874.9896 | 3      | 215   | 229 | R.RNLDIERPTYTNLNR.L              |           |
| 1717.8747                    | 1718.8855 | 2      | 216   | 229 | R.NLDIERPTYTNLNR.L               |           |
| 1456.8613                    | 1457.876  | 5      | 230   | 243 | R.LIGQIVSSITASLR.F               |           |
| 2408.2012                    | 2409.2073 | -1     | 244   | 264 | R.FDGALNVDLTFQTNLVPYPR.I         |           |
| 1756.9559                    | 1756.9663 | 2      | 265   | 280 | R.IHFPLATYAPVISAEEK.A            |           |
| 1609.9039                    | 1610.897  | -9     | 321   | 336 | R.GDVVPKDVNAAIATIK.T             |           |
| 1014.5709                    | 1015.5777 | -1     | 327   | 336 | K.DVNAAIATIK.T                   |           |
| 1754.845                     | 1755.89   | 21     | 339   | 352 | K.RTIQFVDCPTGFK.V                |           |
| 1823.9782                    | 1824.984  | -1     | 353   | 370 | K.VGINYQPPTVPPGGDLAK.V           |           |
| 1395.6857                    | 1396.6965 | 3      | 391   | 401 | R.LDHKFDLMYAK.R                  |           |
| 886.4259                     | 887.4356  | 3      | 395   | 401 | K.FDLMYAK.R                      |           |
| 902.4208                     | 903.4473  | 21     | 395   | 401 | K.FDLMYAK.R                      |           |
| 1058.5219                    | 1059.5331 | 4      | 395   | 402 | K.FDLMYAKR.A                     |           |
| 2501.107                     | 2502.1792 | 26     | 402   | 422 | K.RAFVHWYVYVGEEMEEGFSEAR.E       |           |
| 2345.0059                    | 2346.0068 | -3     | 403   | 422 | R.AFVHWYVYVGEEMEEGFSEAR.E        |           |
| 3116.3357                    | 3117.3594 | 5      | 423   | 450 | R.EDLAALEKDYEEVGVDSVEAEAEEGEEY.- |           |

| Spot 344 (20070719-D8) Tuba1a |           |        |       |     |                          |           |        |               |  |  |  |
|-------------------------------|-----------|--------|-------|-----|--------------------------|-----------|--------|---------------|--|--|--|
| MS•MS/MS                      |           |        |       |     |                          |           |        |               |  |  |  |
| Calculated                    | Observed  | +/-ppm | start | end | Sequence                 | Ion Score | C.I.%  | Modification  |  |  |  |
| 1015.5782                     | 1015.5765 | -2     | 327   | 336 | DVNAAIATIK               |           |        |               |  |  |  |
| 1396.693                      | 1396.6952 | 2      | 391   | 401 | LDHKFDLMYAK              |           |        | Oxidation (M) |  |  |  |
| 1410.7739                     | 1410.7773 | 2      | 85    | 96  | QLFHPEQLITGK             |           |        |               |  |  |  |
| 1410.7739                     | 1410.7773 | 2      | 85    | 96  | QLFHPEQLITGK             | 62        | 100    |               |  |  |  |
| 1457.8685                     | 1457.8756 | 5      | 230   | 243 | LIGQIVSSITASLR           |           |        |               |  |  |  |
| 1552.7941                     | 1552.7986 | 3      | 391   | 402 | LDHKFDLMYAKR             |           |        | Oxidation (M) |  |  |  |
| 1552.7941                     | 1552.7986 | 3      | 391   | 402 | LDHKFDLMYAKR             | 4         | 47.118 | Oxidation (M) |  |  |  |
| 1701.9058                     | 1701.9078 | 1      | 65    | 79  | AVFVDLEPTVIDEVR          |           |        |               |  |  |  |
| 1701.9058                     | 1701.9078 | 1      | 65    | 79  | AVFVDLEPTVIDEVR          | 45        | 99.996 |               |  |  |  |
| 1718.8821                     | 1718.8857 | 2      | 216   | 229 | NLDIERPTYNLNR            |           |        |               |  |  |  |
| 1718.8821                     | 1718.8857 | 2      | 216   | 229 | NLDIERPTYNLNR            | 24        | 99.486 |               |  |  |  |
| 1756.9633                     | 1756.964  | 0      | 265   | 280 | IHFPLATYAPVISAEEK        |           |        |               |  |  |  |
| 1756.9633                     | 1756.964  | 0      | 265   | 280 | IHFPLATYAPVISAEEK        | 133       | 100    |               |  |  |  |
| 1824.9854                     | 1824.9844 | -1     | 353   | 370 | VGINYQPPTVVPGGDLAK       | 47        | 99.998 |               |  |  |  |
| 1824.9854                     | 1824.9844 | -1     | 353   | 370 | VGINYQPPTVVPGGDLAK       |           |        |               |  |  |  |
| 2007.8929                     | 2007.8955 | 1      | 41    | 60  | TIGGGDDSFNTFFSETGAGK     |           |        |               |  |  |  |
| 2007.8929                     | 2007.8955 | 1      | 41    | 60  | TIGGGDDSFNTFFSETGAGK     | 130       | 100    |               |  |  |  |
| 2346.0132                     | 2346.0085 | -2     | 403   | 422 | AFVHWYVYEGMEEGEFSEAR     |           |        | Oxidation (M) |  |  |  |
| 2409.2085                     | 2409.209  | 0      | 244   | 264 | FDGALNVDLTFGTNLVYPR      |           |        |               |  |  |  |
| 2415.2051                     | 2415.207  | 1      | 85    | 105 | QLFHPEQLITGKEDAANNYAR    |           |        |               |  |  |  |
| 2415.2051                     | 2415.207  | 1      | 85    | 105 | QLFHPEQLITGKEDAANNYAR    | 63        | 100    |               |  |  |  |
| 2497.1741                     | 2497.1648 | -4     | 41    | 64  | TIGGGDDSFNTFFSETGAGKHVPR |           |        |               |  |  |  |

| Spot 344 (20070719-D8) Tuba1a |           |        |       |     |                              |           |       |               |  |  |  |
|-------------------------------|-----------|--------|-------|-----|------------------------------|-----------|-------|---------------|--|--|--|
| PMF/MALDI                     |           |        |       |     |                              |           |       |               |  |  |  |
| Calculated                    | Observed  | +/-ppm | start | end | Sequence                     | Ion Score | C.I.% | Modification  |  |  |  |
| 2006.8858                     | 2007.896  | 1      | 41    | 60  | K.TIGGGDDSFNTFFSETGAGK.H     |           |       |               |  |  |  |
| 2496.167                      | 2497.1628 | -5     | 41    | 64  | K.TIGGGDDSFNTFFSETGAGKHVPR.A |           |       |               |  |  |  |
| 1700.8985                     | 1701.9103 | 3      | 65    | 79  | R.AVFVDLEPTVIDEVR.T          |           |       |               |  |  |  |
| 1409.7667                     | 1410.7781 | 3      | 85    | 96  | R.QLFHPEQLITGK.E             |           |       |               |  |  |  |
| 2414.1978                     | 2415.2051 | 0      | 85    | 105 | R.QLFHPEQLITGKEDAANNYAR.G    |           |       |               |  |  |  |
| 1022.4417                     | 1023.4598 | 11     | 97    | 105 | K.EDAANNYAR.G                |           |       |               |  |  |  |
| 908.4967                      | 909.5095  | 6      | 157   | 164 | R.LSVDYGK.K.S                |           |       |               |  |  |  |
| 1873.9758                     | 1874.9896 | 3      | 215   | 229 | R.RNLDIERPTYNLNR.L           |           |       |               |  |  |  |
| 1717.8747                     | 1718.8855 | 2      | 216   | 229 | R.NLDIERPTYNLNR.L            |           |       |               |  |  |  |
| 1456.8613                     | 1457.876  | 5      | 230   | 243 | R.LIGQIVSSITASLR.F           |           |       |               |  |  |  |
| 2408.2012                     | 2409.2073 | -1     | 244   | 264 | R.FDGALNVDLTFGTNLVYPR.I      |           |       |               |  |  |  |
| 1755.9559                     | 1756.9663 | 2      | 265   | 280 | R.IHFPLATYAPVISAEEK.A        |           |       |               |  |  |  |
| 1609.9039                     | 1610.897  | -9     | 321   | 336 | R.GDVVPKDVNAAIATIK.T         |           |       |               |  |  |  |
| 1014.5709                     | 1015.5777 | -1     | 327   | 336 | K.DVNAAIATIK.T               |           |       |               |  |  |  |
| 1754.845                      | 1755.89   | 21     | 339   | 352 | K.RSIQFVWCPTGFK.V            |           |       |               |  |  |  |
| 1823.9782                     | 1824.984  | -1     | 353   | 370 | K.VGINYQPPTVVPGGDLAK.V       |           |       |               |  |  |  |
| 1395.6857                     | 1396.6965 | 3      | 391   | 401 | R.LDHKFDLMYAKR               |           |       | Oxidation (M) |  |  |  |
| 886.4259                      | 887.4356  | 3      | 395   | 401 | K.FDLMYAKR                   |           |       |               |  |  |  |
| 902.4208                      | 903.4473  | 21     | 395   | 401 | K.FDLMYAKR                   |           |       | Oxidation (M) |  |  |  |
| 1058.5219                     | 1059.5331 | 4      | 395   | 402 | K.FDLMYAKR.A                 |           |       | Oxidation (M) |  |  |  |
| 2501.107                      | 2502.1792 | 26     | 402   | 422 | R.AFVHWYVYEGMEEGEFSEAR.E     |           |       | Oxidation (M) |  |  |  |
| 2345.0059                     | 2346.0068 | -3     | 403   | 422 | R.AFVHWYVYEGMEEGEFSEAR.E     |           |       | Oxidation (M) |  |  |  |

| Spot 344 (20070719-D8) Tuba1b |           |        |       |     |                          |           |        |                     |  |  |  |
|-------------------------------|-----------|--------|-------|-----|--------------------------|-----------|--------|---------------------|--|--|--|
| MS•MS/MS                      |           |        |       |     |                          |           |        |                     |  |  |  |
| Calculated                    | Observed  | +/-ppm | start | end | Sequence                 | Ion Score | C.I.%  | Modification        |  |  |  |
| 1015.5782                     | 1015.5765 | -2     | 327   | 336 | DVNAAIATIK               |           |        |                     |  |  |  |
| 1396.693                      | 1396.6952 | 2      | 391   | 401 | LDHKFDLMYAK              |           |        | Oxidation (M)       |  |  |  |
| 1410.7739                     | 1410.7773 | 2      | 85    | 96  | QLFHPEQLITGK             |           |        |                     |  |  |  |
| 1410.7739                     | 1410.7773 | 2      | 85    | 96  | QLFHPEQLITGK             | 62        | 100    |                     |  |  |  |
| 1552.7941                     | 1552.7986 | 3      | 391   | 402 | LDHKFDLMYAKR             |           |        | Oxidation (M)       |  |  |  |
| 1552.7941                     | 1552.7986 | 3      | 391   | 402 | LDHKFDLMYAKR             | 4         | 47.118 | Oxidation (M)       |  |  |  |
| 1701.9058                     | 1701.9078 | 1      | 65    | 79  | AVFVDLEPTVIDEVR          |           |        |                     |  |  |  |
| 1701.9058                     | 1701.9078 | 1      | 65    | 79  | AVFVDLEPTVIDEVR          | 45        | 99.996 |                     |  |  |  |
| 1718.8821                     | 1718.8857 | 2      | 216   | 229 | NLDIERPTYNLNR            |           |        |                     |  |  |  |
| 1718.8821                     | 1718.8857 | 2      | 216   | 229 | NLDIERPTYNLNR            | 24        | 99.486 |                     |  |  |  |
| 1740.8527                     | 1740.8761 | 13     | 339   | 352 | RSIQFVWCPTGFK            |           |        | Carbamidomethyl (C) |  |  |  |
| 1756.9633                     | 1756.964  | 0      | 265   | 280 | IHFPLATYAPVISAEEK        |           |        |                     |  |  |  |
| 1756.9633                     | 1756.964  | 0      | 265   | 280 | IHFPLATYAPVISAEEK        | 133       | 100    |                     |  |  |  |
| 1824.9854                     | 1824.9844 | -1     | 353   | 370 | VGINYQPPTVVPGGDLAK       | 47        | 99.998 |                     |  |  |  |
| 1824.9854                     | 1824.9844 | -1     | 353   | 370 | VGINYQPPTVVPGGDLAK       |           |        |                     |  |  |  |
| 2007.8929                     | 2007.8955 | 1      | 41    | 60  | TIGGGDDSFNTFFSETGAGK     |           |        |                     |  |  |  |
| 2007.8929                     | 2007.8955 | 1      | 41    | 60  | TIGGGDDSFNTFFSETGAGK     | 130       | 100    |                     |  |  |  |
| 2346.0132                     | 2346.0085 | -2     | 403   | 422 | AFVHWYVYEGMEEGEFSEAR     |           |        | Oxidation (M)       |  |  |  |
| 2409.2085                     | 2409.209  | 0      | 244   | 264 | FDGALNVDLTFGTNLVYPR      |           |        |                     |  |  |  |
| 2415.2051                     | 2415.207  | 1      | 85    | 105 | QLFHPEQLITGKEDAANNYAR    |           |        |                     |  |  |  |
| 2415.2051                     | 2415.207  | 1      | 85    | 105 | QLFHPEQLITGKEDAANNYAR    | 63        | 100    |                     |  |  |  |
| 2497.1741                     | 2497.1648 | -4     | 41    | 64  | TIGGGDDSFNTFFSETGAGKHVPR |           |        |                     |  |  |  |

| Spot 344 (20070719-D8) Tuba1b |           |        |       |     |                              |           |       |               |  |  |  |
|-------------------------------|-----------|--------|-------|-----|------------------------------|-----------|-------|---------------|--|--|--|
| PMF/MALDI                     |           |        |       |     |                              |           |       |               |  |  |  |
| Calculated                    | Observed  | +/-ppm | start | end | Sequence                     | Ion Score | C.I.% | Modification  |  |  |  |
| 2006.8858                     | 2007.896  | 1      | 41    | 60  | K.TIGGGDDSFNTFFSETGAGK.H     |           |       |               |  |  |  |
| 2496.167                      | 2497.1628 | -5     | 41    | 64  | K.TIGGGDDSFNTFFSETGAGKHVPR.A |           |       |               |  |  |  |
| 1700.8985                     | 1701.9103 | 3      | 65    | 79  | R.AVFVDLEPTVIDEVR.T          |           |       |               |  |  |  |
| 1409.7667                     | 1410.7781 | 3      | 85    | 96  | R.QLFHPEQLITGK.E             |           |       |               |  |  |  |
| 2414.1978                     | 2415.2051 | 0      | 85    | 105 | R.QLFHPEQLITGKEDAANNYAR.G    |           |       |               |  |  |  |
| 1022.4417                     | 1023.4598 | 11     | 97    | 105 | K.EDAANNYAR.G                |           |       |               |  |  |  |
| 908.4967                      | 909.5095  | 6      | 157   | 164 | R.LSVDYGK.K.S                |           |       |               |  |  |  |
| 1873.9758                     | 1874.9896 | 3      | 215   | 229 | R.RNLDIERPTYNLNR.L           |           |       |               |  |  |  |
| 1717.8747                     | 1718.8855 | 2      | 216   | 229 | R.NLDIERPTYNLNR.L            |           |       |               |  |  |  |
| 2408.2012                     | 2409.2073 | -1     | 244   | 264 | R.FDGALNVDLTFGTNLVYPR.I      |           |       |               |  |  |  |
| 1755.9559                     | 1756.9663 | 2      | 265   | 280 | R.IHFPLATYAPVISAEEK.A        |           |       |               |  |  |  |
| 1609.9039                     | 1610.897  | -9     | 321   | 336 | R.GDVVPKDVNAAIATIK.T         |           |       |               |  |  |  |
| 1014.5709                     | 1015.5777 | -1     | 327   | 336 | K.DVNAAIATIK.T               |           |       |               |  |  |  |
| 1740.8294                     | 1741.8292 | -4     | 339   | 352 | K.RSIQFVWCPTGFK.V            |           |       |               |  |  |  |
| 1823.9782                     | 1824.984  | -1     | 353   | 370 | K.VGINYQPPTVVPGGDLAK.V       |           |       |               |  |  |  |
| 1395.6857                     | 1396.6965 | 3      | 391   | 401 | R.LDHKFDLMYAKR               |           |       | Oxidation (M) |  |  |  |
| 886.4259                      | 887.4356  | 3      | 395   | 401 | K.FDLMYAKR                   |           |       |               |  |  |  |
| 902.4208                      | 903.4473  | 21     | 395   | 401 | K.FDLMYAKR                   |           |       | Oxidation (M) |  |  |  |
| 1058.5219                     | 1059.5331 | 4      | 395   | 402 | K.FDLMYAKR.A                 |           |       | Oxidation (M) |  |  |  |
| 2501.107                      | 2502.1792 | 26     | 402   | 422 | R.AFVHWYVYEGMEEGEFSEAR.E     |           |       | Oxidation (M) |  |  |  |
| 2345.0059                     | 2346.0068 | -3     | 403   | 422 | R.AFVHWYVYEGMEEGEFSEAR.E     |           |       | Oxidation (M) |  |  |  |

| Spot 344 (20070719-D8) Tuba1c |           |        |       |     |                          |           |        |                                    |  |
|-------------------------------|-----------|--------|-------|-----|--------------------------|-----------|--------|------------------------------------|--|
| MS•MS/MS                      |           |        |       |     |                          |           |        |                                    |  |
| Calculated                    | Observed  | +/-ppm | start | end | Sequence                 | Ion Score | C.I. % | Modification                       |  |
| 1015.5782                     | 1015.5765 | -2     | 327   | 336 | DVNAAIATIK               |           |        |                                    |  |
| 1396.693                      | 1396.6952 | 2      | 391   | 401 | LDHKFDLMYAK              |           |        | Oxidation (M)                      |  |
| 1410.7739                     | 1410.7773 | 2      | 85    | 96  | QLFHPEQLTGK              |           |        |                                    |  |
| 1410.7739                     | 1410.7773 | 2      | 85    | 96  | QLFHPEQLTGK              | 62        | 100    |                                    |  |
| 1552.7941                     | 1552.7986 | 3      | 391   | 402 | LDHKFDLMYAKR             |           |        | Oxidation (M)                      |  |
| 1552.7941                     | 1552.7986 | 3      | 391   | 402 | LDHKFDLMYAKR             | 4         | 47.118 | Oxidation (M)                      |  |
| 1701.9058                     | 1701.9078 | 1      | 65    | 79  | AVFVDLEPTVDEVR           |           |        |                                    |  |
| 1701.9058                     | 1701.9078 | 1      | 65    | 79  | AVFVDLEPTVDEVR           | 45        | 99.996 |                                    |  |
| 1718.8821                     | 1718.8857 | 2      | 216   | 229 | NLDIERPTYNLNR            |           |        |                                    |  |
| 1718.8821                     | 1718.8857 | 2      | 216   | 229 | NLDIERPTYNLNR            | 24        | 99.486 |                                    |  |
| 1756.9633                     | 1756.964  | 0      | 265   | 280 | IHFPLATYAPVISAEEK        |           |        |                                    |  |
| 1756.9633                     | 1756.964  | 0      | 265   | 280 | IHFPLATYAPVISAEEK        | 133       | 100    |                                    |  |
| 2007.8929                     | 2007.8955 | 1      | 41    | 60  | TIGGGDDSFNTFFSETGAGK     | 130       | 100    |                                    |  |
| 2007.8929                     | 2007.8955 | 1      | 41    | 60  | TIGGGDDSFNTFFSETGAGK     |           |        |                                    |  |
| 2346.0132                     | 2346.0085 | -2     | 403   | 422 | AFVHWYYVGEEMEEGFSEAR     |           |        | Oxidation (M)                      |  |
| 2409.2085                     | 2409.209  | 0      | 244   | 264 | FDGALNVDLTFQTNLVYPR      |           |        |                                    |  |
| 2415.2051                     | 2415.207  | 1      | 85    | 105 | QLFHPEQLTGKEDAANNYAR     | 63        | 100    |                                    |  |
| 2415.2051                     | 2415.207  | 1      | 85    | 105 | QLFHPEQLTGKEDAANNYAR     |           |        |                                    |  |
| 2497.1741                     | 2497.1648 | -4     | 41    | 64  | TIGGGDDSFNTFFSETGAGKHVPR |           |        |                                    |  |
| 2780.3018                     | 2780.312  | 4      | 261   | 304 | AYHEQLTVAETNACFEPANQVMYK |           |        | Carbamidomethyl (C); Oxidation (M) |  |

| Spot 344 (20070719-D8) Tuba1c |           |        |       |     |                              |           |        |               |  |
|-------------------------------|-----------|--------|-------|-----|------------------------------|-----------|--------|---------------|--|
| PMF/MALDI                     |           |        |       |     |                              |           |        |               |  |
| Calculated                    | Observed  | +/-ppm | start | end | Sequence                     | Ion Score | C.I. % | Modification  |  |
| 2006.8958                     | 2007.896  | 1      | 41    | 60  | K.TIGGGDDSFNTFFSETGAGK.H     |           |        |               |  |
| 2496.167                      | 2497.1628 | -5     | 41    | 64  | K.TIGGGDDSFNTFFSETGAGKHVPR.A |           |        |               |  |
| 1700.8955                     | 1701.9103 | 3      | 65    | 79  | R.AVFVDLEPTVDEVR.T           |           |        |               |  |
| 1409.7667                     | 1410.7781 | 3      | 85    | 96  | R.QLFHPEQLTGK.E              |           |        |               |  |
| 2414.1978                     | 2415.2051 | 0      | 85    | 105 | R.QLFHPEQLTGKEDAANNYAR.G     |           |        |               |  |
| 1022.4417                     | 1023.4598 | 11     | 97    | 105 | K.EDAANNYAR.G                |           |        |               |  |
| 908.4967                      | 909.5095  | 6      | 157   | 164 | R.LSVDYGK.S                  |           |        |               |  |
| 1873.9758                     | 1874.9896 | 3      | 215   | 229 | R.NLDIERPTYNLNR.L            |           |        |               |  |
| 1717.8747                     | 1718.8855 | 2      | 216   | 229 | R.NLDIERPTYNLNR.L            |           |        |               |  |
| 2408.2012                     | 2409.2073 | -1     | 244   | 264 | R.FDGALNVDLTFQTNLVYPR.I      |           |        |               |  |
| 1755.9559                     | 1756.9663 | 2      | 265   | 280 | R.IHFPLATYAPVISAEEK.A        |           |        |               |  |
| 1609.9039                     | 1610.897  | -9     | 321   | 336 | R.GDVVPKDVNAAIATIK.T         |           |        |               |  |
| 1014.5709                     | 1015.5777 | -1     | 327   | 336 | K.DVNAAIATIK.T               |           |        |               |  |
| 1754.845                      | 1755.89   | 21     | 339   | 352 | K.RTIQFVDWCPTGFK.V           |           |        |               |  |
| 1851.9843                     | 1852.9657 | -14    | 353   | 370 | K.VGINYQPPTVPPGGDLAR.V       |           |        |               |  |
| 1395.6857                     | 1396.6965 | 3      | 391   | 401 | R.LDHKFDLMYAK.R              |           |        | Oxidation (M) |  |
| 886.4259                      | 887.4356  | 3      | 395   | 401 | K.FDLMYAK.R                  |           |        |               |  |
| 902.4208                      | 903.4473  | 21     | 395   | 401 | K.FDLMYAK.R                  |           |        | Oxidation (M) |  |
| 1058.5219                     | 1059.5331 | 4      | 395   | 402 | K.FDLMYAKR.A                 |           |        | Oxidation (M) |  |
| 2501.107                      | 2502.1792 | 26     | 402   | 422 | K.RAFVHWYYVGEEMEEGFSEAR.E    |           |        | Oxidation (M) |  |
| 2345.0059                     | 2346.0068 | -3     | 403   | 422 | R.AFVHWYYVGEEMEEGFSEAR.E     |           |        | Oxidation (M) |  |

| Spot 344 (20070719-D8) Tuba8 |           |        |       |     |                      |           |        |                                        |  |
|------------------------------|-----------|--------|-------|-----|----------------------|-----------|--------|----------------------------------------|--|
| MS•MS/MS                     |           |        |       |     |                      |           |        |                                        |  |
| Calculated                   | Observed  | +/-ppm | start | end | Sequence             | Ion Score | C.I. % | Modification                           |  |
| 1396.693                     | 1396.6952 | 2      | 391   | 401 | LDHKFDLMYAK          |           |        | Oxidation (M)                          |  |
| 1410.7739                    | 1410.7773 | 2      | 85    | 96  | QLFHPEQLTGK          |           |        |                                        |  |
| 1410.7739                    | 1410.7773 | 2      | 85    | 96  | QLFHPEQLTGK          | 62        | 100    |                                        |  |
| 1552.7941                    | 1552.7986 | 3      | 391   | 402 | LDHKFDLMYAKR         |           |        | Oxidation (M)                          |  |
| 1552.7941                    | 1552.7986 | 3      | 391   | 402 | LDHKFDLMYAKR         | 4         | 51.931 | Oxidation (M)                          |  |
| 1687.8571                    | 1687.8923 | 21     | 65    | 79  | AVMVDLEPTVDEVR       |           |        | Oxidation (M)                          |  |
| 1687.8571                    | 1687.8923 | 21     | 65    | 79  | AVMVDLEPTVDEVR       | 103       | 100    | Oxidation (M)                          |  |
| 1718.8821                    | 1718.8857 | 2      | 216   | 229 | NLDIERPTYNLNR        |           |        |                                        |  |
| 1718.8821                    | 1718.8857 | 2      | 216   | 229 | NLDIERPTYNLNR        | 24        | 99.532 |                                        |  |
| 1824.9854                    | 1824.9844 | -1     | 353   | 370 | VGINYQPPTVPPGGDLAK   | 47        | 99.998 |                                        |  |
| 1824.9854                    | 1824.9844 | -1     | 353   | 370 | VGINYQPPTVPPGGDLAK   |           |        |                                        |  |
| 1894.8318                    | 1894.9236 | 48     | 312   | 326 | YMACCMLYRGDVVPK      |           |        | 2 Carbamidomethyl (C); 2 Oxidation (M) |  |
| 2346.0132                    | 2346.0085 | -2     | 403   | 422 | AFVHWYYVGEEMEEGFSEAR |           |        | Oxidation (M)                          |  |
| 2409.2085                    | 2409.209  | 0      | 244   | 264 | FDGALNVDLTFQTNLVYPR  |           |        |                                        |  |
| 2415.2051                    | 2415.207  | 1      | 85    | 105 | QLFHPEQLTGKEDAANNYAR | 63        | 100    |                                        |  |
| 2415.2051                    | 2415.207  | 1      | 85    | 105 | QLFHPEQLTGKEDAANNYAR |           |        |                                        |  |

**Spot 350 (D7 20080606) – mixture of: Cytosol aminopeptidase (Leucine aminopeptidase 3) (Lap3) and Pre-mRNA-processing factor 19 (Nuclear matrix protein SNEV [Mus musculus]) (Prpf19)**

SUB (4700 Reflector Spec #1 MC=>BC=>MC[BP = 882.6, 6166] , <<C1\_MS\_1>> 4700 Reflector Spec #1 MC=>BC=>MC[BP = 882.6, 673

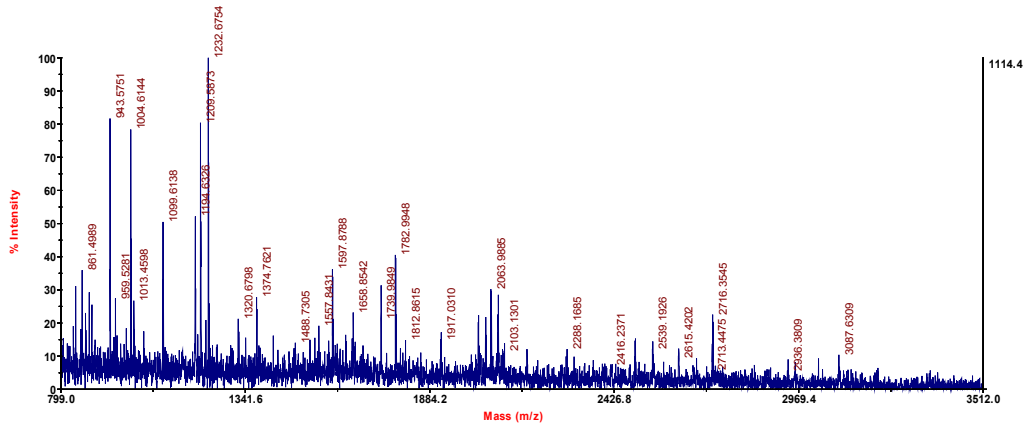

| Spot 350 (20080606-D7) Lap3 |           |        |       |     |                                  |           |       |                 |  |
|-----------------------------|-----------|--------|-------|-----|----------------------------------|-----------|-------|-----------------|--|
| PMF/MALDI                   |           |        |       |     |                                  |           |       |                 |  |
| Calculated                  | Observed  | +/-ppm | start | end | Sequence                         | Ion Score | C.I.% | Modification    |  |
| 2025.8916                   | 2026.9033 | 2      | 44    | 61  | K.DKDDVDPQFTSAGENFNK.L           |           |       |                 |  |
| 2082.9355                   | 2083.95   | 3      | 105   | 122 | R.SAGVDDQENWHEGKENIR.A           |           |       |                 |  |
| 1231.6673                   | 1232.6754 | 1      | 189   | 200 | K.GVLFASGQNLAR.Q                 |           |       |                 |  |
| 1635.7232                   | 1636.7472 | 10     | 201   | 214 | R.QLMESPANEMTPTR.F               |           |       | 2 Oxidation (M) |  |
| 2085.0088                   | 2085.97   | -22    | 236   | 253 | R.TKSWIEEQEMGSFSLVAK.G           |           |       | Oxidation (M)   |  |
| 3084.6444                   | 3085.5066 | -15    | 254   | 282 | K.GSEEPVFLIEHYTGSPNATEAPLVFVGK.G |           |       |                 |  |
| 1193.6292                   | 1194.6326 | -3     | 263   | 294 | K.GITFDSGGISIK.A                 |           |       |                 |  |
| 2715.2336                   | 2716.3545 | 42     | 295   | 321 | K.ASANMDLMRADMGAATCSAIVSAAK.L    |           |       | 2 Oxidation (M) |  |
| 1663.8318                   | 1664.8372 | -1     | 418   | 431 | K.LFEASVETGDRVWR.M               |           |       |                 |  |
| 1208.5648                   | 1209.5873 | 13     | 432   | 440 | R.MPLFEHYTR.Q                    |           |       | Oxidation (M)   |  |
| 1003.6066                   | 1004.6144 | 1      | 506   | 513 | R.TLIEFLLR.F                     |           |       |                 |  |

| Spot 350 (20080606-D7) Prpf19 |           |        |       |     |                              |           |       |               |  |
|-------------------------------|-----------|--------|-------|-----|------------------------------|-----------|-------|---------------|--|
| PMF/MALDI                     |           |        |       |     |                              |           |       |               |  |
| Calculated                    | Observed  | +/-ppm | start | end | Sequence                     | Ion Score | C.I.% | Modification  |  |
| 2046.9833                     | 2047.9907 | 0      | 77    | 93  | K.ALQDEWDVAMLHSFTLR.Q        |           |       | Oxidation (M) |  |
| 1373.7514                     | 1374.7621 | 2      | 176   | 187 | K.LQDKATVLTTR.K              |           |       |               |  |
| 883.4869                      | 890.4893  | -8     | 180   | 187 | K.ATYLTTR.K                  |           |       |               |  |
| 1781.9774                     | 1782.9948 | 6      | 191   | 206 | R.GKTVPEELVKPEELSK.Y         |           |       |               |  |
| 1596.861                      | 1597.8788 | 7      | 193   | 206 | K.TVPEELVKPEELSK.Y           |           |       |               |  |
| 1916.0255                     | 1917.031  | -1     | 193   | 208 | K.TVPEELVKPEELSKYR.Q         |           |       |               |  |
| 2614.3755                     | 2615.4202 | 14     | 266   | 289 | K.KVTSVVFHPSQELVFSASPDATIR.I |           |       |               |  |
| 2486.2806                     | 2487.282  | -2     | 267   | 289 | K.VTTSVVFHPSQELVFSASPDATIR.I |           |       |               |  |
| 958.5236                      | 959.5281  | -3     | 376   | 382 | K.IWDLKER.T                  |           |       |               |  |
| 1319.6721                     | 1320.6798 | 0      | 429   | 439 | K.TLQLDNNFEVK.S              |           |       |               |  |
| 1012.4648                     | 1013.4598 | -12    | 489   | 497 | K.FIATGMDR.S                 |           |       | Oxidation (M) |  |

# Spot 351 (D10 20080606) - Protein disulfide isomerase (P4hb, Pdia1)

SUB (4700 Reflector Spec #1 MC=>BC=>MC[BP = 1834.9, 9095] , <<C1\_MS\_1>> 4700 Reflector Spec #1 MC=>BC=>MC[BP = 882.6, 67

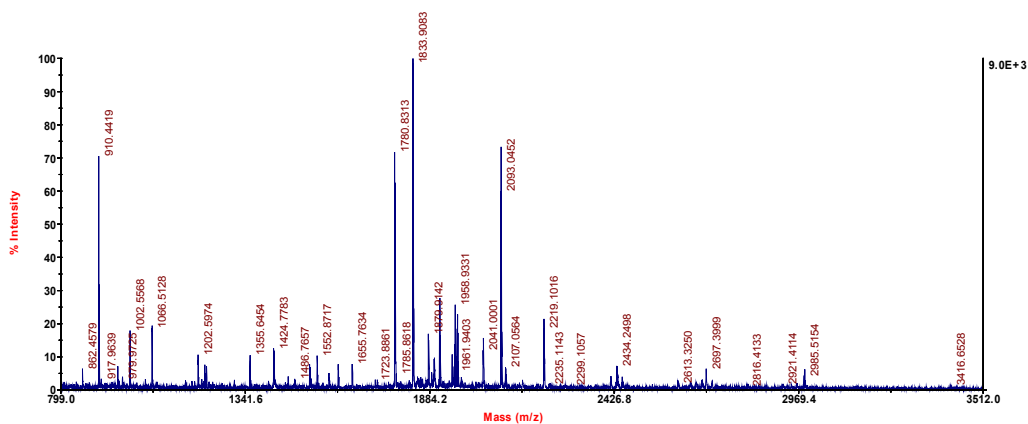

| Spot 351 (20080606-D10) P4hb, Pdia1 |           |        |       |     |                                 |               |
|-------------------------------------|-----------|--------|-------|-----|---------------------------------|---------------|
| PMF/MALDI                           |           |        |       |     |                                 |               |
| Calculated                          | Observed  | +/-ppm | start | end | Sequence                        |               |
| 861.4596                            | 862.4579  | -10    | 60    | 67  | K.ALAPEYAK.A                    |               |
| 1001.5505                           | 1002.5568 | -1     | 72    | 80  | K.LKAEQSEIR.L                   |               |
| 2092.0436                           | 2093.0452 | -3     | 81    | 99  | R.LAKVDATEESDLAQQYGVR.G         |               |
| 1779.8275                           | 1780.8313 | -2     | 84    | 99  | K.VDATEESDLAQQYGVR.G            |               |
| 1465.6797                           | 1466.6812 | -4     | 109   | 122 | K.NGDTASPKEYTAGR.E              |               |
| 2649.267                            | 2650.292  | 7      | 109   | 132 | K.NGDTASPKEYTAGREADDIVNWLK.K    |               |
| 1878.9112                           | 1879.9142 | -2     | 117   | 132 | K.EYTAGREADDIVNWLK.K            |               |
| 1201.5979                           | 1202.5974 | -6     | 123   | 132 | R.EADDIVNWLK.K                  |               |
| 1485.7939                           | 1486.7657 | -24    | 123   | 134 | R.EADDIVNWLK.K.R.T              |               |
| 2984.4866                           | 2985.5154 | 7      | 135   | 164 | R.TGPAATLSDTAAAESLVDSEVTGIFFK.D |               |
| 1423.7711                           | 1424.7783 | 0      | 198   | 209 | K.YGLDKDGWLFK.K                 |               |
| 1551.8661                           | 1552.8717 | -1     | 198   | 210 | K.YGLDKDGWLFK.K.F               |               |
| 1654.7587                           | 1655.7634 | -2     | 211   | 224 | K.FDEGRNFEGETK.E                |               |
| 1911.8962                           | 1912.9025 | -1     | 211   | 226 | K.FDEGRNFEGETK.E.L              |               |
| 1964.0367                           | 1965.0376 | -3     | 233   | 249 | K.HNQLPLVIEFTEGTAPK.I           |               |
| 1458.6991                           | 1459.6934 | -9     | 266   | 278 | K.SVSDYDGKLSNFK.K               |               |
| 1586.794                            | 1587.8044 | 2      | 266   | 279 | K.SVSDYDGKLSNFK.K.A             |               |
| 1832.9057                           | 1833.9083 | -3     | 288   | 302 | K.ILFIFIDSDHTDNGR.I             |               |
| 965.5586                            | 966.5621  | -4     | 303   | 310 | R.ILEFFGLK.K                    |               |
| 1221.6162                           | 1222.6202 | -3     | 319   | 328 | R.LITLLEEMTK.Y                  | Oxidation (M) |
| 2612.2778                           | 2613.325  | 15     | 319   | 340 | R.LITLLEEMTKY.PESDELTAEK.I      | Oxidation (M) |
| 1408.6722                           | 1409.6638 | -12    | 329   | 340 | K.YKPESDELTAEK.I                |               |
| 2433.2362                           | 2434.2498 | 3      | 353   | 372 | K.IKPHLMSQELPEDWDKQPVK.V        | Oxidation (M) |
| 1722.8828                           | 1723.8861 | -2     | 373   | 387 | K.VLVGKNFEVAFDEK.K              |               |
| 1850.9778                           | 1852.0033 | 10     | 373   | 388 | K.VLVGKNFEVAFDEK.K.N            |               |
| 1226.5455                           | 1227.5547 | 2      | 378   | 387 | K.NFEVAFDEK.K                   |               |
| 1354.6405                           | 1355.6454 | -2     | 378   | 388 | K.NFEVAFDEK.K.N                 |               |
| 1728.9046                           | 1729.9036 | -5     | 412   | 426 | K.LGETYKDHENVIK.M               |               |
| 2202.0991                           | 2203.1057 | 0      | 427   | 446 | K.MDSTANEVAVKVSFPTLK.F          |               |
| 2218.094                            | 2219.1016 | 0      | 427   | 446 | K.MDSTANEVAVKVSFPTLK.F          |               |
| 909.4345                            | 910.4419  | 0      | 447   | 454 | K.FFPASADR.T                    | Oxidation (M) |
| 1956.933                            | 1957.9414 | 1      | 447   | 463 | K.FFPASADRTVIDYNGER.T           |               |
| 1065.5091                           | 1066.5128 | -3     | 455   | 463 | R.TVIDYNGER.T                   |               |

# Spot 352 (B5 20080606) - COP9 signalosome complex subunit 4 (Cops4)

SUB (4700 Reflector Spec #1 MC=>BC=>MC[BP = 842.5, 58128] , <<A1\_MS\_1>> 4700 Reflector Spec #1 MC=>BC=>MC[BP = 882.6, 21

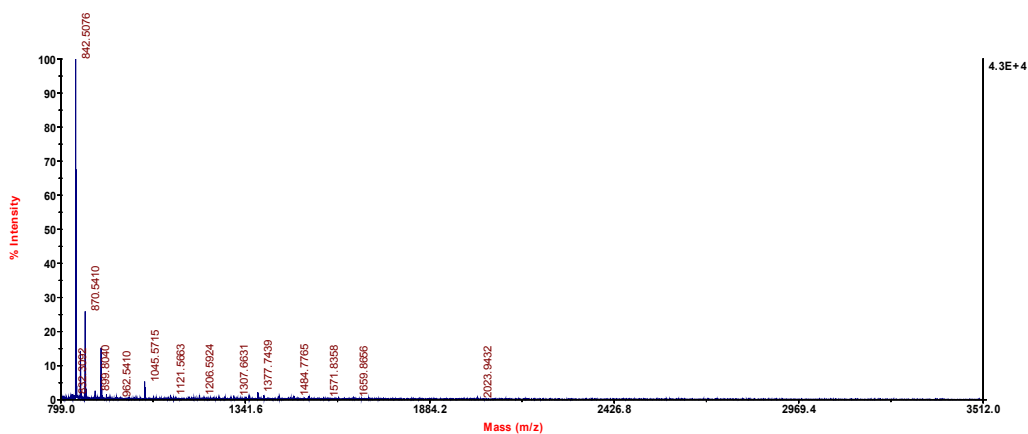

| Spot 352 (20080606-B5) Cops4 |           |        |       |     |                             |           |
|------------------------------|-----------|--------|-------|-----|-----------------------------|-----------|
| MS•MS/MS                     |           |        |       |     |                             |           |
| Calculated                   | Observed  | +/-ppm | start | end | Sequence                    | Ion Score |
| 834.4468                     | 834.4577  | 13     | 201   | 207 | FIEAAQR                     |           |
| 962.5417                     | 962.5405  | -1     | 200   | 207 | KFIEAAQR                    |           |
| 1121.5619                    | 1121.5663 | 4      | 338   | 347 | IASGMITEGR                  |           |
| 1206.5961                    | 1206.5956 | 0      | 291   | 302 | ATTADGSSILDR                |           |
| 1239.6401                    | 1239.6414 | 1      | 245   | 254 | MLATLFKDER                  |           |
| 1281.7161                    | 1281.6975 | -15    | 303   | 314 | AVIEHNLLSASK                |           |
| 1377.7372                    | 1377.7427 | 4      | 96    | 107 | VISFEEQVASIR                |           |
| 1377.7372                    | 1377.7427 | 4      | 96    | 107 | VISFEEQVASIR                | 12        |
| 2023.9607                    | 2023.9435 | -8     | 154   | 170 | LYLEDDDPVQAEAYINR           |           |
| 2023.9607                    | 2023.9435 | -8     | 154   | 170 | LYLEDDDPVQAEAYINR           | 21        |
| 3030.4771                    | 3030.4241 | -17    | 275   | 302 | GNQLQEFAAMLPHQKATTADGSSILDR |           |

| Spot 352 (20080606-B5) Cops4 |           |        |       |     |                                 |           |
|------------------------------|-----------|--------|-------|-----|---------------------------------|-----------|
| PMF/MALDI                    |           |        |       |     |                                 |           |
| Calculated                   | Observed  | +/-ppm | start | end | Sequence                        | Ion Score |
| 1376.73                      | 1377.7421 | 4      | 96    | 107 | R.VISFEEQVASIR.Q                |           |
| 2022.9534                    | 2023.9425 | -9     | 154   | 170 | R.LYLEDDDPVQAEAYINR.A           |           |
| 820.4555                     | 821.459   | -5     | 194   | 199 | R.VLDYRR.K                      |           |
| 961.5345                     | 962.5381  | -4     | 200   | 207 | R.KFIEAAQR.Y                    |           |
| 833.4395                     | 834.4591  | 15     | 201   | 207 | K.FIEAAQR.Y                     |           |
| 1238.6329                    | 1239.6398 | 0      | 245   | 254 | R.MLATLFKDER.C                  |           |
| 2224.1609                    | 2225.1296 | -17    | 272   | 290 | R.IIRGNLQEFAAMLPHQK.A           |           |
| 3029.4699                    | 3030.4172 | -20    | 275   | 302 | R.GNQLQEFAAMLPHQKATTADGSSILDR.A |           |
| 1205.5888                    | 1206.5944 | -1     | 291   | 302 | K.ATTADGSSILDR.A                |           |
| 1280.7088                    | 1281.7002 | -12    | 303   | 314 | R.AVIEHNLLSASK.L                |           |
| 1120.5546                    | 1121.5657 | 3      | 338   | 347 | K.IASGMITEGR.M                  |           |
| 1990.9571                    | 1991.9879 | 12     | 348   | 364 | R.MNGFIDQIGIVHFETR.E            |           |



# Spot 356 (B15 20080606) - Splicing factor 3a, subunit 1 (Sf3a1)

SUB (4700 Reflector Spec #1 MC=>BC=>MC[BP = 842.5, 61229] , <<A1\_MS\_1>> 4700 Reflector Spec #1 MC=>BC=>MC[BP = 882.6, 21

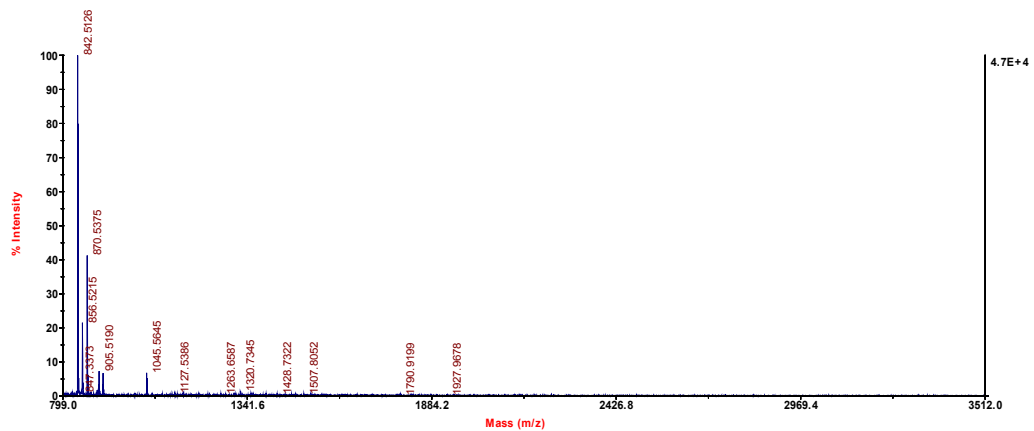

| Spot 356 (20080606-B15) Sf3a1 |           |        |       |     |                     |               |
|-------------------------------|-----------|--------|-------|-----|---------------------|---------------|
| PMF/MALDI                     |           |        |       |     |                     |               |
| Calculated                    | Observed  | +/-ppm | start | end | Sequence            |               |
|                               |           |        |       |     |                     | Ion Score     |
|                               |           |        |       |     |                     | C.I.%         |
|                               |           |        |       |     |                     | Modification  |
| 1319.7197                     | 1320.7345 | 6      | 51    | 62  | R.NIVDKTASFYAR.N    |               |
| 918.4195                      | 919.4335  | 7      | 63    | 70  | R.NGPEFEAR.I        |               |
| 1324.6986                     | 1325.6404 | -49    | 103   | 115 | K.EGKAQEPSAIPK.V    |               |
| 1926.9562                     | 1927.9678 | 1      | 116   | 131 | K.VMQQQQATGQGLPQK.V | Oxidation (M) |
| 904.513                       | 905.519   | -1     | 169   | 176 | K.LTAQFVAR.N        |               |
| 879.4702                      | 880.4664  | -13    | 211   | 217 | K.LVGEYTK.I         |               |
| 846.3476                      | 847.3373  | -21    | 423   | 428 | K.MQEHMR.I          | Oxidation (M) |
| 1506.793                      | 1507.8052 | 3      | 472   | 485 | R.TDIFGVEETAIGKK.I  |               |
| 1427.7143                     | 1428.7322 | 7      | 486   | 497 | K.IGEEIIGKPEEK.V    |               |
| 841.5021                      | 842.5126  | 4      | 699   | 706 | R.NKGPVSIK.V        |               |
| 1126.5441                     | 1127.5386 | -11    | 742   | 752 | K.IHEATGMPAGK.Q     |               |

## Spot 360 (E3 20070719) – Proteasome subunit alpha type 6 (Psm $\alpha$ 6)

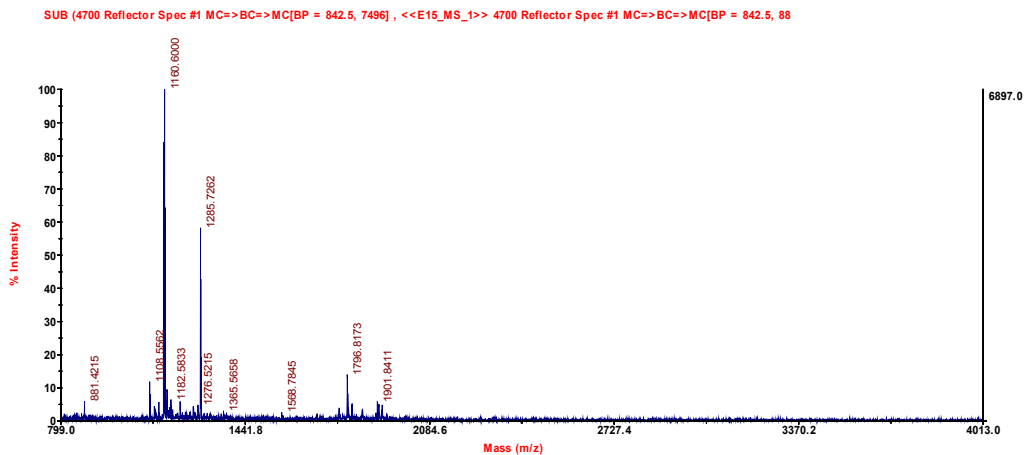

| Spot 360 (20070719-E3) Psm $\alpha$ 6 |           |        |       |     |                                          |                                    |
|---------------------------------------|-----------|--------|-------|-----|------------------------------------------|------------------------------------|
| MS+MS/MS                              |           |        |       |     |                                          |                                    |
| Calculated                            | Observed  | +/-ppm | start | end | Sequence                                 |                                    |
| 881.4151                              | 881.4256  | 12     | 96    | 102 | YEAA $\text{N}^{\text{W}}$ K             | Ion Score                          |
| 1108.5535                             | 1108.5562 | 2      | 94    | 102 | ARYEA $\text{A}^{\text{N}^{\text{W}}}$ K | C.I.%                              |
| 1108.5535                             | 1108.5562 | 2      | 94    | 102 | ARYEA $\text{A}^{\text{N}^{\text{W}}}$ K | Modification                       |
| 1156.611                              | 1156.6102 | -1     | 12    | 21  | HITIFSPEGR                               |                                    |
| 1160.5986                             | 1160.5981 | 0      | 22    | 30  | LYQVEYAFK                                |                                    |
| 1160.5986                             | 1160.5981 | 0      | 22    | 30  | LYQVEYAFK                                | 44                                 |
| 1285.7223                             | 1285.726  | 3      | 31    | 43  | AINQGG $\text{LTSVAVR}$                  | 99.996                             |
| 1285.7223                             | 1285.726  | 3      | 31    | 43  | AINQGG $\text{LTSVAVR}$                  | 10                                 |
| 1285.7223                             | 1285.726  | 3      | 31    | 43  | AINQGG $\text{LTSVAVR}$                  | 90.066                             |
| 1767.9122                             | 1767.9266 | 8      | 165   | 181 | ATAAGV $\text{KQTESTSFLEK}$              |                                    |
| 1794.8441                             | 1794.8049 | -22    | 103   | 116 | YKYGYEIPV $\text{DMLCK}$                 |                                    |
| 1933.9514                             | 1933.9553 | 2      | 4     | 21  | GSSAGFDRHITIFSPEGR                       | Carbamidomethyl (C); Oxidation (M) |

| Spot 360 (20070719-E3) Psm $\alpha$ 6 |           |        |       |     |                                             |              |
|---------------------------------------|-----------|--------|-------|-----|---------------------------------------------|--------------|
| PMF/MALDI                             |           |        |       |     |                                             |              |
| Calculated                            | Observed  | +/-ppm | start | end | Sequence                                    |              |
| 1932.9442                             | 1933.9255 | -13    | 4     | 21  | R.GSSAGFDRHITIFSPEGR.L                      | Ion Score    |
| 1155.6037                             | 1156.6105 | 0      | 12    | 21  | R.HITIFSPEGR.L                              | C.I.%        |
| 1159.5913                             | 1160.6    | 1      | 22    | 30  | R.LYQVEYAFK.A                               | Modification |
| 1284.715                              | 1285.7262 | 3      | 31    | 43  | K.AINQGG $\text{LTSVAVR.G}$                 |              |
| 1107.5451                             | 1108.5562 | 3      | 94    | 102 | R.ARYEA $\text{A}^{\text{N}^{\text{W}}}$ .Y |              |
| 880.4079                              | 881.4215  | 7      | 96    | 102 | R.YEAA $\text{N}^{\text{W}}.Y$              |              |
| 1766.905                              | 1767.9244 | 7      | 165   | 181 | K.ATAAGV $\text{KQTESTSFLEK.K}$             |              |
| 1168.5612                             | 1169.5929 | 21     | 172   | 181 | K.QTESTSFLEK.K                              |              |

# Spot 375 (A8 20080606) – mixture of: Ras-related protein Rab-2A (Rab2a) and Protein DJ-1 (Park7, Cap1)

SUB (4700 Reflector Spec #1 MC=>BC=>MC[BP = 842.5, 68207] , <<A1\_MS\_1>> 4700 Reflector Spec #1 MC=>BC=>MC[BP = 882.6, 21

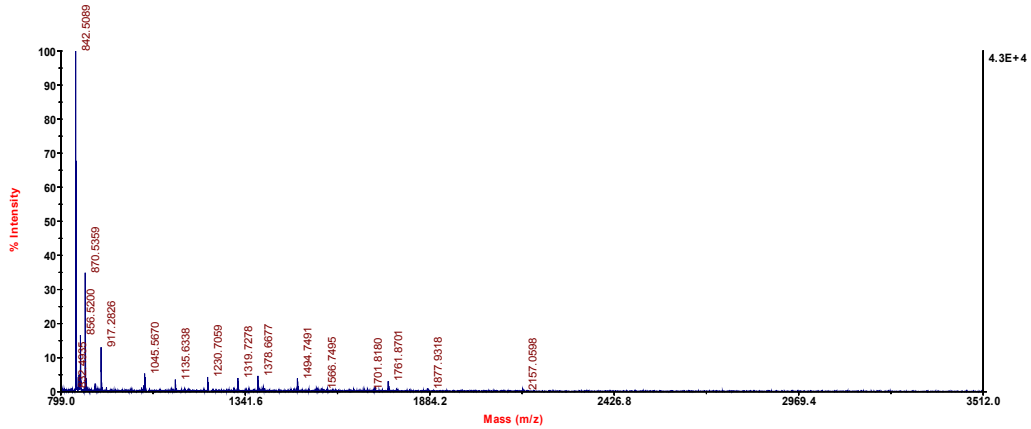

## Spot 375 (20080606.A8) Rab2a

| MS+MS/MS   |           |        |       |     |                     |           |        |               |
|------------|-----------|--------|-------|-----|---------------------|-----------|--------|---------------|
| Calculated | Observed  | +/-ppm | start | end | Sequence            | Ion Score | C.I.%  | Modification  |
| 1036.5057  | 1036.5148 | 9      | 131   | 139 | KEEGEAFAR           |           |        |               |
| 1036.5057  | 1036.5148 | 9      | 131   | 139 | KEEGEAFAR           |           |        |               |
| 1045.5425  | 1045.5641 | 21     | 70    | 77  | SITRSYYR            |           |        |               |
| 1135.6357  | 1135.6366 | 1      | 9     | 19  | YIIIGDTGVGK         | 51        | 99.999 |               |
| 1135.6357  | 1135.6366 | 1      | 9     | 19  | YIIIGDTGVGK         |           |        |               |
| 1319.7317  | 1319.7283 | -3     | 78    | 90  | GAAGALLYVDITR       | 13        | 94.86  |               |
| 1319.7317  | 1319.7283 | -3     | 78    | 90  | GAAGALLYVDITR       |           |        |               |
| 1378.6671  | 1378.6672 | 0      | 140   | 151 | EHGLIFMETSAR        |           |        | Oxidation (M) |
| 1378.6671  | 1378.6672 | 0      | 140   | 151 | EHGLIFMETSAR        |           |        | Oxidation (M) |
| 1494.7434  | 1494.7462 | 2      | 152   | 165 | TASNVEEAFINTAK      | 29        | 99.874 |               |
| 1494.7434  | 1494.7462 | 2      | 152   | 165 | TASNVEEAFINTAK      |           |        |               |
| 1560.7598  | 1560.7543 | -4     | 57    | 69  | LOIWDTAGQESFR       |           |        |               |
| 1760.8813  | 1760.8767 | -3     | 171   | 186 | IQEGVFDINNEANGIK    |           |        |               |
| 2157.071   | 2157.0581 | -6     | 152   | 170 | TASNVEEAFINTAKEIYEK |           |        |               |

## Spot 375 (20080606.A8) Rab2a

| PMF/MALDI  |           |        |       |     |                         |           |       |               |
|------------|-----------|--------|-------|-----|-------------------------|-----------|-------|---------------|
| Calculated | Observed  | +/-ppm | start | end | Sequence                | Ion Score | C.I.% | Modification  |
| 1134.6285  | 1135.6338 | -2     | 9     | 19  | K.YIIIGDTGVGK.S         |           |       |               |
| 1380.7071  | 1381.6903 | -17    | 20    | 30  | K.SCLLLOFTDKR.F         |           |       |               |
| 1549.7525  | 1560.7616 | 1      | 57    | 69  | K.LOIWDTAGQESFR.S       |           |       |               |
| 1044.5352  | 1045.567  | 23     | 70    | 77  | R.SITRSYYR.G            |           |       |               |
| 1318.7245  | 1319.7278 | -3     | 78    | 90  | R.GAAGALLYVDITR.R       |           |       |               |
| 1717.806   | 1718.8014 | -7     | 92    | 105 | R.DTFNHLLTWLEDAR.Q      |           |       |               |
| 1700.8338  | 1701.818  | -14    | 106   | 120 | R.QHSNSNMVIMLGNK.S      |           |       | Oxidation (M) |
| 1391.7045  | 1392.7074 | -3     | 128   | 139 | R.EVKKEEGEAFAR.E        |           |       |               |
| 1035.4985  | 1036.5099 | 4      | 131   | 139 | K.KEEGEEAFAR.E          |           |       |               |
| 1377.6598  | 1378.6677 | 0      | 140   | 151 | R.EHGLIFMETSAR.T        |           |       | Oxidation (M) |
| 1493.7362  | 1494.7491 | 4      | 152   | 165 | K.TASNVEEAFINTAK.E      |           |       |               |
| 2156.0637  | 2157.0598 | -5     | 152   | 170 | K.TASNVEEAFINTAKEIYEK.I |           |       |               |

## Spot 375 (20080606.A8) Park7, Cap1

| MS+MS/MS   |           |        |       |     |                 |           |        |                 |
|------------|-----------|--------|-------|-----|-----------------|-----------|--------|-----------------|
| Calculated | Observed  | +/-ppm | start | end | Sequence        | Ion Score | C.I.%  | Modification    |
| 852.4937   | 852.4966  | 3      | 123   | 130 | VTSHPLAK        |           |        |                 |
| 874.4992   | 874.5023  | 4      | 149   | 156 | DGLILTSR        |           |        |                 |
| 1230.7052  | 1230.7036 | -1     | 146   | 156 | VEKDGLILTSR     |           |        |                 |
| 1230.7052  | 1230.7036 | -1     | 146   | 156 | VEKDGLILTSR     | 28        | 99.826 |                 |
| 1721.8085  | 1721.797  | -7     | 13    | 27  | GAEEMETVIPVDIMR |           |        | 2 Oxidation (M) |
| 1877.9095  | 1877.9126 | 2      | 13    | 28  | GAEEMETVIPVDIMR |           |        | 2 Oxidation (M) |

# Spot 379 (D5 20080606) – mixture of: Platelet-activating factor acetylhydrolase 1B subunit beta (Pafah1b2) and Isoamyl acetate-hydrolyzing esterase 1 homolog (Iah1)

SUB (4700 Reflector Spec #1 MC=>BC=>MC[BP = 842.5, 66581] , <<C1\_MS\_1>> 4700 Reflector Spec #1 MC=>BC=>MC[BP = 882.6, 67

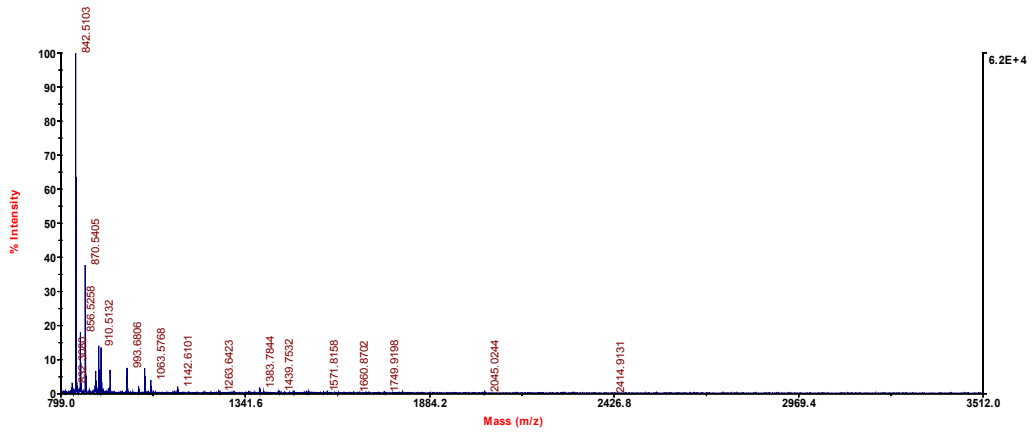

| Spot 379 (20080606-D5) Pafah1b2 |           |        |       |     |                  |              |
|---------------------------------|-----------|--------|-------|-----|------------------|--------------|
| MS•MS/MS                        |           |        |       |     |                  |              |
| Calculated                      | Observed  | +/-ppm | start | end | Sequence         |              |
|                                 |           |        |       |     |                  | Ion Score    |
|                                 |           |        |       |     |                  | C.I.%        |
|                                 |           |        |       |     |                  | Modification |
| 910.5104                        | 910.5142  | 4      | 143   | 150 | GEKPNPLR         | 29           |
| 910.5104                        | 910.5142  | 4      | 143   | 150 | GEKPNPLR         | 99.624       |
| 993.6818                        | 993.682   | 0      | 134   | 142 | IVLGLLLPR        |              |
| 993.6818                        | 993.682   | 0      | 134   | 142 | IVLGLLLPR        | 26           |
| 1027.6259                       | 1027.6255 | 0      | 153   | 161 | NAKVNQLLK        | 99.656       |
| 1027.6259                       | 1027.6255 | 0      | 153   | 161 | NAKVNQLLK        | 96.599       |
| 1141.6211                       | 1141.6268 | 5      | 87    | 96  | NGELENIKPK       |              |
| 2045.045                        | 2045.0251 | -10    | 61    | 79  | ELFSPHALNFGIGDIT |              |

| Spot 379 (20080606-D5) Iah1 |           |        |       |     |                 |              |
|-----------------------------|-----------|--------|-------|-----|-----------------|--------------|
| MS•MS/MS                    |           |        |       |     |                 |              |
| Calculated                  | Observed  | +/-ppm | start | end | Sequence        |              |
|                             |           |        |       |     |                 | Ion Score    |
|                             |           |        |       |     |                 | C.I.%        |
|                             |           |        |       |     |                 | Modification |
| 901.4162                    | 901.4185  | 3      | 53    | 60  | GFSGYNTR        |              |
| 901.4162                    | 901.4185  | 3      | 53    | 60  | GFSGYNTR        |              |
| 904.4669                    | 904.4306  | -40    | 46    | 52  | KCDVLNFR        |              |
| 940.4556                    | 940.4541  | -2     | 113   | 119 | DMVQYLR         |              |
| 943.5206                    | 943.5217  | 1      | 120   | 127 | SVDIPKER        | 16           |
| 943.5206                    | 943.5217  | 1      | 120   | 127 | SVDIPKER        | 97.003       |
| 993.6931                    | 993.682   | -11    | 64    | 71  | ILLPRIIR        |              |
| 993.6931                    | 993.682   | -11    | 64    | 71  | ILLPRIIR        |              |
| 1063.5782                   | 1063.5775 | -1     | 155   | 164 | LNVAVGEYAK      |              |
| 1063.5782                   | 1063.5775 | -1     | 155   | 164 | LNVAVGEYAK      | 21           |
| 1794.8401                   | 1794.8553 | 8      | 172   | 186 | DCGTDVLDLWTLMQK | 98.992       |
